# Supplementary material for: Consolidated BRCA1/2 Variant Interpretation by MH BRCA Correlates with Predicted PARP Inhibitor Efficacy Association by MH Guide
Source: Int J Mol Sci. 2020 May 29;21(11):3895. doi: 10.3390/ijms21113895 (PMC7312854; doi:10.3390/ijms21113895)
Supplement: Supplementary file 1 [file ijms-21-03895-s001.zip]

Archive with 6 entries (6 files):
- Figure S1-S3.pdf
- Supplemental Table 1.xlsx
- Supplemental Table 2.xlsx
- Supplemental Table 3.pdf
- Supplemental Table 4.xlsx
- Supplemental Table 5.xlsx
