# Supplementary material for: Consolidated BRCA1/2 Variant Interpretation by MH BRCA Correlates with Predicted PARP Inhibitor Efficacy Association by MH Guide
Source: Int J Mol Sci. 2020 May 29;21(11):3895. doi: 10.3390/ijms21113895 (PMC7312854; doi:10.3390/ijms21113895)
Supplement: Supplementary file 1 [file ijms-21-03895-s001.zip › Supplemental Table 1.xlsx]

## Sheet: Tabelle1
Evidence of pathogenicity			Evidence of benign impact
Code	ACMG criteria and interpretation	Database consulted	Code	ACMG criteria and interpretation	Database consulted
PVS1	“Null variant” (nonsense, frameshift, canonical ±1 or 2 splice sites, initiation codon, single or multi-exon deletion) in a gene where loss of function is a known mechanism of disease.	MH generated data: Gene list derived from the evaluation of pathogenic and benign nonsense, canonical splice site and start-loss variants with high or mid confidence level from ClinVar	BA1	MH BRCA: Allele frequency is >1% in Exome Sequencing Project, 1000 Genomes Project, or Exome Aggregation Consortium.	GnomAD data
PS1	Same amino acid change as a previously established pathogenic variant regardless of nucleotide change.	ClinVar, ENIGMA (via BRCA Exchange) variant classification	BS1	Allele frequency is greater than expected for disorder. MH BRCA: Allele frequency is >0.01% in Exome Sequencing Project, 1000 Genomes Project, or Exome Aggregation Consortium.	GnomAD data
PS2	De novo (both maternity and paternity confirmed) in a patient with the disease and no family history.	Not automatically evaluated	BS2	Observed in a healthy adult individual for a recessive (homozygous), dominant (heterozygous), or X-linked (hemizygous) disorder, with full penetrance expected at an early age.	Not automatically evaluated
PS3	Well-established in vitro or in vivo functional studies supportive of a damaging effect on the gene or gene product.	MH Variant annotation database (VarDB)	BS3	Well-established in vitro or in vivo functional studies show no damaging effect on protein function or splicing.	MH Variant annotation database VarDB
PS4	The prevalence of the variant in affected individuals is significantly increased compared with the prevalence in controls.	Not automatically evaluated	BS4	Lack of segregation in affected members of a family.	Not automatically evaluated
PM1	Located in a mutational hot spot and/or critical and well-established functional domain (e.g., active site of an enzyme) without benign variation.	MH generated data: mutational hot spots / clusters of pathogenic variants derived from the evaluation of ClinVar variants; SMART and UniProt data	BP1	Missense variant in a gene for which primarily truncating variants are known to cause disease.	MH generated data: Gene list derived from the evaluation of pathogenic and benign loss of function variants with high and mid confidence level from ClinVar
PM2	Absent from controls (or at extremely low frequency if recessive) in Exome Sequencing Project, 1000 Genomes Project, or Exome Aggregation Consortium.	GnomAD or ToMMo data (for Pop Frequencies)	BP2	Observed in trans with a pathogenic variant for a fully penetrant dominant gene/disorder or observed in cis with a pathogenic variant in any inheritance pattern.	Not automatically evaluated
PM3	For recessive disorders, detected in trans with a pathogenic variant.	Not automatically evaluated	BP3	In-frame deletions/insertions in a repetitive region without a known function.	UniProt and SMART data
PM4	Protein length changes as a result of in-frame deletions / insertions in a non-repeat region or stop-loss variants.	UniProt data	BP4	Multiple lines of computational evidence suggest no impact on gene or gene product (conservation, evolutionary, splicing impact, etc.).	dbNSFP (MetaLR and MetaSVM) and dbscSNV data
PM5	Novel missense change at an amino acid residue where a different missense change determined to be pathogenic has been seen before.	ClinVar, ENIGMA (via BRCA Exchange) variant classification	BP5	Variant found in a case with an alternate molecular basis for disease.	Not automatically evaluated
PM6	Assumed de novo, but without confirmation of paternity and maternity.	Not automatically evaluated	BP6	Reputable source recently reports variant as benign, but the evidence is not available to the laboratory to perform an independent evaluation.	ClinVar, ENIGMA (via BRCA Exchange), BIC (via BRCA Exchange), UTAH/ARUP BRCA variant classification
PP1	Co-segregation with disease in multiple affected family members in a gene definitively known to cause the disease. Needs mother and father and more family member sequencing.	Not automatically evaluated	BP7	A synonymous (silent) variant for which splicing prediction algorithms predict no impact to the splice consensus sequence nor the creation of a new splice site AND the nucleotide is not highly conserved.	Not automatically evaluated
PP2	Missense variant in a gene that has a low rate of benign missense variation and in which missense variants are a common mechanism of disease.	MH generated data: Gene list derived from the evaluation of pathogenic and benign missense variants with high and mid confidence level from ClinVar
PP3	Multiple lines of computational evidence support a deleterious effect on the gene or gene product (conservation, evolutionary, splicing impact, etc.).	dbNSFP (MetaLR and MetaSVM) and dbscSNV data
PP4	Patient's phenotype or family history is highly specific for a disease with a single genetic etiology.	Not automatically evaluated
PP5	Reputable source recently reports variant as pathogenic, but the evidence is not available to the laboratory to perform an independent evaluation.	ClinVar, ENIGMA (via BRCA Exchange), BIC (via BRCA Exchange), UTAH/ARUP BRCA variant classification
