# Supplementary material for: Consolidated BRCA1/2 Variant Interpretation by MH BRCA Correlates with Predicted PARP Inhibitor Efficacy Association by MH Guide
Source: Int J Mol Sci. 2020 May 29;21(11):3895. doi: 10.3390/ijms21113895 (PMC7312854; doi:10.3390/ijms21113895)
Supplement: Supplementary file 1 [file ijms-21-03895-s001.zip › Supplemental Table 2.xlsx]

## Sheet: Momozawa et al.
Gene	g.HGVS	c.HGVS	p.HGVS	Type	SNP-ID number	Momozawa et al. classification	MH BRCA DB onsensus	MH BRCA ACMG	MH BRCA Consolidated	MH BRCA ACMG criteria	MH Guide predicted PARPi response
BRCA2	32893224A>G	78A>G	P26=	synonymous codon	rs772146565	VUS	LIKELY BENIGN	LIKELY BENIGN	LIKELY BENIGN	BS1
BRCA2	32893236T>C	90T>C	N30=	synonymous codon	rs760655471	Benign	LIKELY BENIGN	LIKELY BENIGN	LIKELY BENIGN	BS1
BRCA2	32893253C>T	107C>T	S36F	missense	rs730881554	VUS	VUS	VUS	VUS	PP3 | BP1
BRCA2	32893269CTATAA>C	125_129delATAAT	Y42fs	frameshift variant	.	Pathogenic		LIKELY PATHOGENIC	LIKELY PATHOGENIC	PVS1 | PM2	HRD deficient (high)
BRCA2	32893271A>G	125A>G	Y42C	missense	rs4987046	Benign	BENIGN	BENIGN	BENIGN	BS1 | BS3 | BP1 | BP4 | BP6	neutral
BRCA2	32893291G>T	145G>T	E49*	stop gained	rs80358435	Pathogenic	PATHOGENIC	PATHOGENIC	PATHOGENIC	PVS1 | PS1 | PM2 | PP5	HRD deficient (high)
BRCA2	32893298A>G	152A>G	E51G	missense	.	VUS		LIKELY BENIGN	LIKELY BENIGN	BP1 | BP4 | PM2
BRCA2	32893320A>G	174A>G	E58=	synonymous codon	.	VUS	LIKELY BENIGN	VUS	VUS	PM2
BRCA2	32893328T>C	182T>C	L61P	missense	.	VUS	LIKELY BENIGN	LIKELY BENIGN	LIKELY BENIGN	BP1 | BP4 | PM2
BRCA2	32893361A>G	215A>G	N72S	missense	rs276174818	VUS	VUS	LIKELY BENIGN	LIKELY BENIGN	BS1 | BP1 | BP4
BRCA2	32893368G>A	222G>A	L74=	synonymous codon	.	VUS	LIKELY BENIGN	VUS	LIKELY BENIGN	PM2
BRCA2	32893381A>G	235A>G	I79V	missense	rs80358502	VUS	VUS	LIKELY BENIGN	LIKELY BENIGN	BS1 | BP1 | BP4
BRCA2	32893396C>G	250C>G	Q84E	missense	.	VUS	VUS	VUS	VUS	PM2 |BP1
BRCA2	32893412C>T	266C>T	P89L	missense	rs748609599	VUS	VUS	VUS	VUS	BP1
BRCA2	32893420C>T	274C>T	Q92*	stop gained	rs80358529	Pathogenic	PATHOGENIC	PATHOGENIC	PATHOGENIC	PVS1 | PS1 | PM2 | PP5	HRD deficient (high)
BRCA2	32893422A>G	276A>G	Q92=	synonymous codon	rs771101539	VUS	LIKELY BENIGN	VUS	LIKELY BENIGN	-
BRCA2	32893425TC>T	281delC	P94fs	frameshift variant	.	Pathogenic		LIKELY PATHOGENIC	LIKELY PATHOGENIC	PVS1 | PM2	HRD deficient (high)
BRCA2	32893435G>T	289G>T	E97*	stop gained	rs397507646	Pathogenic	PATHOGENIC	PATHOGENIC	PATHOGENIC	PVS1 | PS1 | PM2 | PP5	HRD deficient (high)
BRCA2	32899248C>T	352C>T	R118C	missense	rs375125172	Benign	VUS	LIKELY BENIGN	LIKELY BENIGN	BS1 | BP1 | BP4
BRCA2	32899254G>A	358G>A	V120M	missense	.	Benign		LIKELY BENIGN	LIKELY BENIGN	BP1 | BP4 | PM2
BRCA2	32899279A>G	383A>G	D128G	missense	rs80358627	VUS	VUS	LIKELY BENIGN	LIKELY BENIGN	BP1 | BP4 | PM2
BRCA2	32899291G>T	395G>T	C132F	missense	.	VUS		LIKELY BENIGN	LIKELY BENIGN	BP1 | BP4 | PM2
BRCA2	32900251C>T	439C>T	Q147*	stop gained	rs397507717	Pathogenic	PATHOGENIC	PATHOGENIC	PATHOGENIC	PVS1 | PS1 | PM2 | PP5	HRD deficient (high)
BRCA2	32900252A>G	440A>G	Q147R	missense	rs80358674	Benign	VUS	LIKELY BENIGN	LIKELY BENIGN	BS1 | BP1 | BP4
BRCA2	32900258C>T	446C>T	T149I	missense	.	VUS		LIKELY BENIGN	LIKELY BENIGN	BP1 | BP4 | PM2
BRCA2	32900264T>C	452T>C	V151A	missense	rs730881503	VUS	VUS	LIKELY BENIGN	LIKELY BENIGN	BS1 | BP1 | BP4
BRCA2	32900407A>G	504A>G	P168=	synonymous codon	.	VUS		VUS	VUS	PM2
BRCA2	32900421T>C	516+2T>C		splice donor variant	.	Pathogenic	PATHOGENIC	PATHOGENIC	PATHOGENIC	PVS1 | PS3 | PM2 | PP3 | PP5	HRD deficient (high)
BRCA2	32900639C>T	520C>T	R174C	missense	rs41293469	Pathogenic	VUS	VUS	VUS	PS3 | PM2 | BP1 | BP4	likely HRD proficient
BRCA2	32900658T>G	539T>G	I180S	missense	.	VUS		VUS	VUS	PM2 | PP3 | BP1
BRCA2	32900670T>C	551T>C	L184P	missense	rs80358775	Benign	VUS	VUS	VUS	PM2 | PP3 | BP1
BRCA2	32900680G>A	561G>A	E187=	synonymous codon	.	VUS	VUS	VUS	VUS	PM2
BRCA2	32900694T>C	575T>C	M192T	missense	rs80358805	VUS	VUS	VUS	VUS	PM2 | PP3 | BP1
BRCA2	32900699T>G	580T>G	W194G	missense	.	VUS		VUS	VUS	PM2 | PP3 | BP1
BRCA2	32900702T>C	583T>C	S195P	missense	.	VUS		VUS	VUS	PM2 | PP3 | BP1
BRCA2	32900706G>T	587G>T	S196I	missense	rs80358818	VUS	VUS	LIKELY BENIGN	LIKELY BENIGN	BS1 | BP1 | PS3 | PP3	likely HRD proficient
BRCA2	32900726A>G	607A>G	T203A	missense	.	VUS		VUS	VUS	PM2 |BP1
BRCA2	32900733G>C	614G>C	S205T	missense	.	VUS		VUS	VUS	PM2 |BP1
BRCA2	32900742T>G	623T>G	V208G	missense	rs80358865	VUS	VUS	LIKELY BENIGN	LIKELY BENIGN	BS1 | BP1 | PP3
BRCA2	32903579G>A	632-1G>A		splice acceptor variant	rs81002820	Pathogenic	PATHOGENIC	PATHOGENIC	PATHOGENIC	PVS1 | PS3 | PM2 | PP3 | PP5	HRD deficient (high)
BRCA2	32903604CTG>C	658_659delGT	V220fs	frameshift variant	rs768580992	Pathogenic	PATHOGENIC	PATHOGENIC	PATHOGENIC	PVS1 | PS1 | PP5 | BS1	HRD deficient (high)
BRCA2	32905062A>G	688A>G	K230E	missense	.	VUS		VUS	VUS	PM2 |BP1
BRCA2	32905069A>G	695A>G	Y232C	missense	rs372188754	VUS	VUS	LIKELY BENIGN	LIKELY BENIGN	BP1 | BP4
BRCA2	32905082T>C	708T>C	H236=	synonymous codon	rs185506536	Benign	LIKELY BENIGN	LIKELY BENIGN	LIKELY BENIGN	BS1
BRCA2	32905116G>A	742G>A	A248T	missense	rs55854959	VUS	VUS	LIKELY BENIGN	LIKELY BENIGN	BS1 | BP1 | BP4
BRCA2	32905117C>T	743C>T	A248V	missense	.	VUS	VUS	LIKELY BENIGN	LIKELY BENIGN	BP1 | BP4 | PM2
BRCA2	32905122G>A	748G>A	V250M	missense	.	VUS		VUS	VUS	PM2 |BP1
BRCA2	32905123TGACA>T	755_758delACAG	D252fs	frameshift variant	rs80359659	Pathogenic	PATHOGENIC	PATHOGENIC	PATHOGENIC	PVS1 | PS1 | PM2 | PP5	HRD deficient (high)
BRCA2	32906413T>C	798T>C	F266=	synonymous codon	.	VUS	LIKELY BENIGN	VUS	VUS	PM2
BRCA2	32906415G>GA	805dupA	T269fs	frameshift variant	.	Pathogenic	PATHOGENIC	PATHOGENIC	PATHOGENIC	PVS1 | PS1 | PM2 | PP5	HRD deficient (high)
BRCA2	32906422A>G	807A>G	T269=	synonymous codon	rs142072914	Benign	LIKELY BENIGN	VUS	LIKELY BENIGN	-
BRCA2	32906480A>C	865A>C	N289H	missense	rs766173	Benign	BENIGN	BENIGN	BENIGN	BA1 | BS3 | BP1 | BP6	neutral
BRCA2	32906558T>A	943T>A	C315S	missense	rs79483201	Benign	VUS	LIKELY BENIGN	LIKELY BENIGN	BS1 | BP1 | BP4
BRCA2	32906559G>A	944G>A	C315Y	missense	.	VUS		LIKELY BENIGN	LIKELY BENIGN	BP1 | BP4 | PM2
BRCA2	32906561A>G	946A>G	R316G	missense	.	VUS		VUS	VUS	PM2 |BP1
BRCA2	32906579A>C	964A>C	K322Q	missense	rs11571640	Benign	VUS	BENIGN	BENIGN	BA1 | BP1	neutral
BRCA2	32906588A>G	973A>G	T325A	missense	.	VUS		LIKELY BENIGN	LIKELY BENIGN	BP1 | BP4 | PM2
BRCA2	32906615C>T	1000C>T	H334Y	missense	.	VUS		LIKELY BENIGN	LIKELY BENIGN	BP1 | BP4 | PM2
BRCA2	32906626C>T	1011C>T	N337=	synonymous codon	rs41293473	VUS	LIKELY BENIGN	LIKELY BENIGN	LIKELY BENIGN	BS1
BRCA2	32906648A>G	1033A>G	K345E	missense	rs80358406	VUS	VUS	LIKELY BENIGN	LIKELY BENIGN	BP1 | BP4
BRCA2	32906673C>T	1058C>T	S353L	missense	rs769368098	VUS		LIKELY BENIGN	LIKELY BENIGN	BP1 | BP4
BRCA2	32906683T>C	1068T>C	S356=	synonymous codon	.	VUS		VUS	VUS	PM2
BRCA2	32906729A>C	1114A>C	N372H	missense	rs144848	Benign	BENIGN	BENIGN	BENIGN	BA1 | BS3 | BP1 | BP6	neutral
BRCA2	32906799G>A	1184G>A	W395*	stop gained	.	Pathogenic	PATHOGENIC	PATHOGENIC	PATHOGENIC	PVS1 | PS1 | PM2 | PP5	HRD deficient (high)
BRCA2	32906833C>G	1218C>G	A406=	synonymous codon	rs276174807	Benign	LIKELY BENIGN	LIKELY BENIGN	LIKELY BENIGN	BS1
BRCA2	32906847T>C	1232T>C	I411T	missense	rs79597821	Benign	LIKELY BENIGN	LIKELY BENIGN	LIKELY BENIGN	BP1 | BP4
BRCA2	32906852C>A	1237C>A	L413I	missense	.	VUS		VUS	VUS	PM2 |BP1
BRCA2	32906859A>G	1244A>G	H415R	missense	rs80358417	VUS	VUS	LIKELY BENIGN	LIKELY BENIGN	BS1 | BP1
BRCA2	32906876C>T	1261C>T	Q421*	stop gained	rs80358419	Pathogenic	PATHOGENIC	PATHOGENIC	PATHOGENIC	PVS1 | PS1 | PM2 | PP5	HRD deficient (high)
BRCA2	32906888GA>G	1278delA	D427fs	frameshift variant	rs80359274	Pathogenic	PATHOGENIC	PATHOGENIC	PATHOGENIC	PVS1 | PS1 | PM2 | PP5	HRD deficient (high)
BRCA2	32906890A>G	1275A>G	E425=	synonymous codon	rs34355306	Benign	BENIGN	VUS	BENIGN	BP6
BRCA2	32906900T>C	1285T>C	L429=	synonymous codon	.	VUS		VUS	VUS	PM2
BRCA2	32906910A>C	1295A>C	E432A	missense	.	VUS	VUS	VUS	VUS	PM2 |BP1
BRCA2	32906921A>G	1306A>G	K436E	missense	.	VUS		LIKELY BENIGN	LIKELY BENIGN	BP1 | BP4 | PM2
BRCA2	32906929T>C	1314T>C	D438=	synonymous codon	.	VUS		VUS	VUS	PM2
BRCA2	32906957C>T	1342C>T	R448C	missense	rs80358422	VUS	VUS	LIKELY BENIGN	LIKELY BENIGN	BS1 | BP1 | BP4
BRCA2	32906958G>A	1343G>A	R448H	missense	rs80358423	VUS	VUS	LIKELY BENIGN	LIKELY BENIGN	BP1 | BP4
BRCA2	32906977A>G	1362A>G	K454=	synonymous codon	rs55919657	Benign	BENIGN	LIKELY BENIGN	BENIGN	BS1 | BP6
BRCA2	32906980A>G	1365A>G	S455=	synonymous codon	rs1801439	Benign	BENIGN	BENIGN	BENIGN	BA1 | BP6	neutral
BRCA2	32907003CAG>C	1389_1390delAG	V464fs	frameshift variant	rs80359283	Pathogenic	PATHOGENIC	PATHOGENIC	PATHOGENIC	PVS1 | PS1 | PM2 | PP5	HRD deficient (high)
BRCA2	32907014A>T	1399A>T	K467*	stop gained	rs80358427	Pathogenic	PATHOGENIC	PATHOGENIC	PATHOGENIC	PVS1 | PS1 | PP5	HRD deficient (high)
BRCA2	32907054G>A	1439G>A	C480Y	missense	rs587782648	VUS	VUS	LIKELY BENIGN	LIKELY BENIGN	BP1 | BP4 | PM2
BRCA2	32907057T>C	1442T>C	I481T	missense	.	VUS		LIKELY BENIGN	LIKELY BENIGN	BP1 | BP4 | PM2
BRCA2	32907095GT>G	1481delT	V494fs	frameshift variant	.	Pathogenic		LIKELY PATHOGENIC	LIKELY PATHOGENIC	PVS1 | PM2	HRD deficient (high)
BRCA2	32907100T>G	1485T>G	A495=	synonymous codon	.	VUS		VUS	VUS	PM2
BRCA2	32907102C>G	1487C>G	S496C	missense	.	VUS		LIKELY BENIGN	LIKELY BENIGN	BP1 | BP4 | PM2
BRCA2	32907157G>A	1542G>A	E514=	synonymous codon	.	VUS		VUS	VUS	PM2
BRCA2	32907162T>C	1547T>C	F516S	missense	.	VUS	VUS	LIKELY BENIGN	LIKELY BENIGN	BP1 | BP4 | PM2
BRCA2	32907165A>G	1550A>G	N517S	missense	rs80358439	VUS	LIKELY BENIGN	BENIGN	BENIGN	BS1 | BS3 | BP1 | BP4	neutral
BRCA2	32907178A>C	1563A>C	S521=	synonymous codon	.	VUS		VUS	VUS	PM2
BRCA2	32907183A>G	1568A>G	H523R	missense	rs80358443	Benign	VUS	LIKELY BENIGN	LIKELY BENIGN	BS1 | BP1 | BP4
BRCA2	32907187G>C	1572G>C	M524I	missense	.	VUS		LIKELY BENIGN	LIKELY BENIGN	BP1 | BP4 | PM2
BRCA2	32907200T>C	1585T>C	F529L	missense	.	VUS		LIKELY BENIGN	LIKELY BENIGN	BP1 | BP4 | PM2
BRCA2	32907231G>A	1616G>A	G539E	missense	.	VUS		LIKELY BENIGN	LIKELY BENIGN	BP1 | BP4 | PM2
BRCA2	32907259G>A	1644G>A	Q548=	synonymous codon	rs55986646	Benign	BENIGN	LIKELY BENIGN	BENIGN	BS1 | BP6
BRCA2	32907262G>A	1647G>A	K549=	synonymous codon	rs276174812	Benign	LIKELY BENIGN	LIKELY BENIGN	LIKELY BENIGN	BS1
BRCA2	32907322G>T	1707G>T	Q569H	missense	.	VUS		LIKELY BENIGN	LIKELY BENIGN	BP1 | BP4 | PM2
BRCA2	32907328T>C	1713T>C	S571=	synonymous codon	.	VUS		VUS	VUS	PM2
BRCA2	32907359A>C	1744A>C	T582P	missense	rs80358457	Benign	BENIGN	LIKELY BENIGN	BENIGN	BS1 | BP1 | BP6 | PS3	likely HRD proficient
BRCA2	32907362T>C	1747T>C	L583=	synonymous codon	.	VUS		VUS	VUS	PM2
BRCA2	32907375CAAAT>C	1763_1766delATAA	N588fs	frameshift variant	rs80359303	Pathogenic	PATHOGENIC	PATHOGENIC	PATHOGENIC	PVS1 | PS1 | PM2 | PP5	HRD deficient (high)
BRCA2	32907390A>T	1775A>T	Y592F	missense	.	VUS		VUS	VUS	PM2 | PP3 | BP1
BRCA2	32907420GA>G	1813delA	I605fs	frameshift variant	rs80359307	Pathogenic	PATHOGENIC	PATHOGENIC	PATHOGENIC	PVS1 | PS1 | PP5 | BS1	HRD deficient (high)
BRCA2	32907443A>C	1828A>C	K610Q	missense	.	VUS		LIKELY BENIGN	LIKELY BENIGN	BP1 | BP4 | PM2
BRCA2	32907467G>T	1852G>T	A618S	missense	.	VUS		VUS	VUS	PM2 |BP1
BRCA2	32907479G>A	1864G>A	A622T	missense	.	VUS	VUS	LIKELY BENIGN	LIKELY BENIGN	BP1 | BP4 | PM2
BRCA2	32907494G>A	1879G>A	A627T	missense	.	VUS	VUS	LIKELY BENIGN	LIKELY BENIGN	BP1 | BP4 | PM2
BRCA2	32907504C>T	1889C>T	T630I	missense	rs80358479	VUS	BENIGN	BENIGN	BENIGN	BS1 | BS3 | BP1 | BP6	neutral
BRCA2	32907520T>A	1905T>A	D635E	missense	.	VUS		VUS	VUS	PM2 |BP1
BRCA2	32910444A>G	1952A>G	D651G	missense	rs747387987	VUS		VUS	VUS	BP1
BRCA2	32910549T>G	2057T>G	L686R	missense	.	VUS		VUS	VUS	PM2 | PP3 | BP1
BRCA2	32910619G>C	2127G>C	L709=	synonymous codon	rs554040246	Benign	BENIGN	LIKELY BENIGN	BENIGN	BS1 | BP6
BRCA2	32910658A>G	2166A>G	K722=	synonymous codon	.	VUS		VUS	VUS	PM2
BRCA2	32910672C>CA	2181dupA	D728fs	frameshift variant	.	Pathogenic		LIKELY PATHOGENIC	LIKELY PATHOGENIC	PVS1 | PM2	HRD deficient (high)
BRCA2	32910678T>C	2186T>C	I729T	missense	rs431825296	Benign	VUS	LIKELY BENIGN	LIKELY BENIGN	BS1 | BP1 | BP4
BRCA2	32910701G>T	2209G>T	A737S	missense	rs80358492	VUS		VUS	VUS	PM2 |BP1
BRCA2	32910718A>G	2226A>G	Q742=	synonymous codon	rs748757085	Benign	LIKELY BENIGN	VUS	LIKELY BENIGN	-
BRCA2	32910721T>C	2229T>C	H743=	synonymous codon	rs1801499	Benign	BENIGN	BENIGN	BENIGN	BA1 | BP6	neutral
BRCA2	32910737A>C	2245A>C	S749R	missense	.	VUS		VUS	VUS	PM2 |BP1
BRCA2	32910752C>G	2260C>G	Q754E	missense	.	VUS		LIKELY BENIGN	LIKELY BENIGN	BP1 | BP4 | PM2
BRCA2	32910754A>G	2262A>G	Q754=	synonymous codon	.	VUS	LIKELY BENIGN	VUS	LIKELY BENIGN	PM2
BRCA2	32910772A>C	2280A>C	L760F	missense	.	VUS		LIKELY BENIGN	LIKELY BENIGN	BP1 | BP4 | PM2
BRCA2	32910800A>G	2308A>G	I770V	missense	.	VUS		LIKELY BENIGN	LIKELY BENIGN	BP1 | BP4 | PM2
BRCA2	32910842A>G	2350A>G	M784V	missense	rs11571653	Benign	BENIGN	BENIGN	BENIGN	BA1 | BS3 | BP1 | BP4 | BP6	neutral
BRCA2	32910888A>G	2396A>G	K799R	missense	.	VUS	VUS	LIKELY BENIGN	LIKELY BENIGN	BP1 | BP4 | PM2
BRCA2	32910910T>G	2418T>G	D806E	missense	.	VUS		LIKELY BENIGN	LIKELY BENIGN	BP1 | BP4 | PM2
BRCA2	32910947C>A	2455C>A	Q819K	missense	.	VUS		LIKELY BENIGN	LIKELY BENIGN	BP1 | BP4 | PM2
BRCA2	32910948A>G	2456A>G	Q819R	missense	.	VUS	VUS	VUS	VUS	PM2 |BP1
BRCA2	32910953G>A	2461G>A	V821I	missense	rs756411508	VUS	VUS	LIKELY BENIGN	LIKELY BENIGN	BP1 | BP4
BRCA2	32910959G>A	2467G>A	A823T	missense	.	VUS	VUS	LIKELY BENIGN	LIKELY BENIGN	BP1 | BP4 | PM2
BRCA2	32910974T>C	2482T>C	Y828H	missense	.	VUS	VUS	LIKELY BENIGN	LIKELY BENIGN	BP1 | BP4 | PM2
BRCA2	32910977A>G	2485A>G	K829E	missense	.	VUS	VUS	LIKELY BENIGN	LIKELY BENIGN	BP1 | BP4 | PM2
BRCA2	32910982C>T	2490C>T	N830=	synonymous codon	rs56331088	Benign	LIKELY BENIGN	LIKELY BENIGN	LIKELY BENIGN	BS1
BRCA2	32910994G>T	2502G>T	L834F	missense	.	VUS	VUS	VUS	VUS	PM2 |BP1
BRCA2	32911010A>G	2518A>G	M840V	missense	.	VUS		LIKELY BENIGN	LIKELY BENIGN	BP1 | BP4 | PM2
BRCA2	32911013A>G	2521A>G	R841G	missense	.	VUS	VUS	LIKELY BENIGN	LIKELY BENIGN	BP1 | BP4 | PM2
BRCA2	32911042A>G	2550A>G	Q850=	synonymous codon	rs80359785	Benign	VUS	LIKELY BENIGN	LIKELY BENIGN	BS1
BRCA2	32911074A>C	2582A>C	Q861P	missense	.	VUS		VUS	VUS	PM2 |BP1
BRCA2	32911077A>G	2585A>G	K862R	missense	.	VUS	VUS	LIKELY BENIGN	LIKELY BENIGN	BP1 | BP4 | PM2
BRCA2	32911164T>A	2672T>A	V891D	missense	.	VUS		VUS	VUS	PM2 |BP1
BRCA2	32911179A>T	2687A>T	N896I	missense	.	VUS		VUS	VUS	PM2 |BP1
BRCA2	32911211A>G	2719A>G	K907E	missense	.	VUS	VUS	LIKELY BENIGN	LIKELY BENIGN	BP1 | BP4 | PM2
BRCA2	32911228A>G	2736A>G	T912=	synonymous codon	.	VUS		VUS	VUS	PM2
BRCA2	32911232T>C	2740T>C	L914=	synonymous codon	.	VUS		VUS	VUS	PM2
BRCA2	32911242T>C	2750T>C	V917A	missense	.	VUS		LIKELY BENIGN	LIKELY BENIGN	BP1 | BP4 | PM2
BRCA2	32911291A>G	2799A>G	T933=	synonymous codon	.	VUS		VUS	VUS	PM2
BRCA2	32911293GT>G	2802delT	D935fs	frameshift variant	.	Pathogenic		LIKELY PATHOGENIC	LIKELY PATHOGENIC	PVS1 | PM2	HRD deficient (high)
BRCA2	32911295G>A	2803G>A	D935N	missense	rs28897716	Benign	BENIGN	BENIGN	BENIGN	BS1 | BS3 | BP1 | BP6	neutral
BRCA2	32911297TAAAC>T	2808_2811delACAA	A938fs	frameshift variant	rs80359351	Pathogenic	PATHOGENIC	PATHOGENIC	PATHOGENIC	PVS1 | PS1 | PP5	HRD deficient (high)
BRCA2	32911305C>T	2813C>T	A938V	missense	.	VUS		LIKELY BENIGN	LIKELY BENIGN	BP1 | BP4 | PM2
BRCA2	32911307A>G	2815A>G	T939A	missense	.	VUS	VUS	LIKELY BENIGN	LIKELY BENIGN	BP1 | BP4 | PM2
BRCA2	32911312A>G	2820A>G	Q940=	synonymous codon	rs771061558	VUS	LIKELY BENIGN	VUS	LIKELY BENIGN	-
BRCA2	32911319A>G	2827A>G	I943V	missense	rs397507294	VUS		VUS	VUS	PM2 |BP1
BRCA2	32911405A>C	2913A>C	L971F	missense	.	VUS		LIKELY BENIGN	LIKELY BENIGN	BP1 | BP4 | PM2
BRCA2	32911416TCTC>T	2927_2929delCCT	S976del	cds indel	rs751328384	VUS	VUS	VUS	VUS	PM4
BRCA2	32911438A>G	2946A>G	I982M	missense	rs80358541	Benign	VUS	LIKELY BENIGN	LIKELY BENIGN	BS1 | BP1 | BP4
BRCA2	32911463A>G	2971A>G	N991D	missense	rs1799944	Benign	BENIGN	BENIGN	BENIGN	BA1 | BS3 | BP1 | BP4 | BP6	neutral
BRCA2	32911467A>G	2975A>G	K992R	missense	.	VUS		LIKELY BENIGN	LIKELY BENIGN	BP1 | BP4 | PM2
BRCA2	32911557ATAACAT>A	3069_3074delCATTAA	N1023_I1024del	cds indel	rs730881605	Pathogenic	VUS	VUS	VUS	PM2 | PM4
BRCA2	32911593T>C	3101T>C	I1034T	missense	rs545974734	VUS	VUS	VUS	VUS	PP3 | BP1
BRCA2	32911603A>G	3111A>G	Q1037=	synonymous codon	rs786202967	Benign	LIKELY BENIGN	VUS	LIKELY BENIGN	PM2
BRCA2	32911631A>G	3139A>G	I1047V	missense	.	VUS		LIKELY BENIGN	LIKELY BENIGN	BP1 | BP4 | PM2
BRCA2	32911676C>T	3184C>T	P1062S	missense	.	VUS	VUS	LIKELY BENIGN	LIKELY BENIGN	BP1 | BP4 | PM2
BRCA2	32911683CAATT>C	3195_3198delTAAT	N1066fs	frameshift variant	rs80359375	Pathogenic	PATHOGENIC	PATHOGENIC	PATHOGENIC	PVS1 | PS1 | PM2 | PP5	HRD deficient (high)
BRCA2	32911693TG>T	3202delG	V1068fs	frameshift variant	rs397507658	Pathogenic	PATHOGENIC	PATHOGENIC	PATHOGENIC	PVS1 | PS1 | PM2 | PP5	HRD deficient (high)
BRCA2	32911712A>T	3220A>T	S1074C	missense	rs145605603	Benign	VUS	LIKELY BENIGN	LIKELY BENIGN	BS1 | BP1
BRCA2	32911748A>G	3256A>G	I1086V	missense	rs80358571	VUS	VUS	LIKELY BENIGN	LIKELY BENIGN	BS1 | BP1 | BP4
BRCA2	32911838A>C	3346A>C	T1116P	missense	.	VUS		VUS	VUS	PM2 |BP1
BRCA2	32911841A>G	3349A>G	I1117V	missense	rs397507307	VUS	VUS	VUS	VUS	PM2 | PP3 | BP1
BRCA2	32911878A>T	3386A>T	Q1129L	missense	.	VUS		VUS	VUS	PM2 | PP3 | BP1
BRCA2	32911882T>C	3390T>C	F1130=	synonymous codon	.	VUS		VUS	VUS	PM2
BRCA2	32911886A>G	3394A>G	K1132E	missense	.	VUS		VUS	VUS	PM2 |BP1
BRCA2	32911887A>G	3395A>G	K1132R	missense	rs80358582	Benign	VUS	VUS	VUS	PM2 |BP1
BRCA2	32911888A>G	3396A>G	K1132=	synonymous codon	rs1801406	Benign	BENIGN	BENIGN	BENIGN	BA1 | BP6	neutral
BRCA2	32911905A>G	3413A>G	Q1138R	missense	.	VUS		VUS	VUS	PM2 |BP1
BRCA2	32911907A>G	3415A>G	K1139E	missense	rs747903103	VUS		LIKELY BENIGN	LIKELY BENIGN	BP1 | BP4
BRCA2	32911910A>G	3418A>G	S1140G	missense	.	VUS		LIKELY BENIGN	LIKELY BENIGN	BP1 | BP4 | PM2
BRCA2	32911912T>A	3420T>A	S1140R	missense	.	VUS		LIKELY BENIGN	LIKELY BENIGN	BP1 | BP4
BRCA2	32911954C>G	3462C>G	T1154=	synonymous codon	rs4986856	Benign	LIKELY BENIGN	LIKELY BENIGN	LIKELY BENIGN	BS1
BRCA2	32911968G>A	3476G>A	C1159Y	missense	.	VUS		LIKELY BENIGN	LIKELY BENIGN	BP1 | BP4 | PM2
BRCA2	32911969CAG>C	3481_3482delGA	D1161fs	frameshift variant	.	Pathogenic		LIKELY PATHOGENIC	LIKELY PATHOGENIC	PVS1 | PM2	HRD deficient (high)
BRCA2	32911993A>G	3501A>G	I1167M	missense	.	VUS		LIKELY BENIGN	LIKELY BENIGN	BP1 | BP4 | PM2
BRCA2	32912008G>A	3516G>A	S1172=	synonymous codon	rs1799952	Benign	BENIGN	VUS	BENIGN	BP6
BRCA2	32912016A>G	3524A>G	Q1175R	missense	.	VUS		VUS	VUS	PM2 |BP1
BRCA2	32912047A>T	3555A>T	T1185=	synonymous codon	.	VUS		VUS	VUS	PM2
BRCA2	32912089CTG>C	3599_3600delGT	C1200*	stop gained	rs80359391	Pathogenic	PATHOGENIC	PATHOGENIC	PATHOGENIC	PVS1 | PS1 | PP5	HRD deficient (high)
BRCA2	32912091G>GTT	3600_3601insTT	N1201fs	frameshift variant	.	Pathogenic		LIKELY PATHOGENIC	LIKELY PATHOGENIC	PVS1 | PM2	HRD deficient (high)
BRCA2	32912096A>G	3604A>G	K1202E	missense	.	VUS		LIKELY BENIGN	LIKELY BENIGN	BP1 | BP4 | PM2
BRCA2	32912150T>C	3658T>C	Y1220H	missense	rs397507312	VUS		LIKELY BENIGN	LIKELY BENIGN	BP1 | BP4
BRCA2	32912197A>G	3705A>G	Q1235=	synonymous codon	.	VUS		VUS	VUS	PM2
BRCA2	32912212G>A	3720G>A	L1240=	synonymous codon	rs773240495	Benign	LIKELY BENIGN	VUS	LIKELY BENIGN	-
BRCA2	32912221T>A	3729T>A	D1243E	missense	.	VUS		VUS	VUS	PM2 | PP3 | BP1
BRCA2	32912278A>C	3786A>C	S1262=	synonymous codon	.	VUS		VUS	VUS	PM2
BRCA2	32912299T>C	3807T>C	V1269=	synonymous codon	rs543304	Benign	BENIGN	BENIGN	BENIGN	BA1 | BP6	neutral
BRCA2	32912300G>A	3808G>A	V1270I	missense	.	VUS	VUS	LIKELY BENIGN	LIKELY BENIGN	BP1 | BP4 | PM2
BRCA2	32912306A>G	3814A>G	M1272V	missense	rs80358624	VUS	VUS	LIKELY BENIGN	LIKELY BENIGN	BP1 | BP4
BRCA2	32912310T>A	3818T>A	F1273Y	missense	.	VUS		VUS	VUS	PM2 |BP1
BRCA2	32912318GA>G	3830delA	N1277fs	frameshift variant	rs397507689	Pathogenic	PATHOGENIC	PATHOGENIC	PATHOGENIC	PVS1 | PS1 | PM2 | PP5	HRD deficient (high)
BRCA2	32912345G>GAAA	3858_3860dupAAA	K1286dup	cds indel	.	VUS		VUS	VUS	PM2 | PM4
BRCA2	32912395T>C	3903T>C	T1301=	synonymous codon	rs199786746	VUS	LIKELY BENIGN	VUS	VUS	PM2
BRCA2	32912402A>G	3910A>G	T1304A	missense	rs28897723	VUS	VUS	LIKELY BENIGN	LIKELY BENIGN	BS1 | BP1 | BP4
BRCA2	32912404T>G	3912T>G	T1304=	synonymous codon	.	VUS		VUS	VUS	PM2
BRCA2	32912418T>G	3926T>G	I1309S	missense	.	VUS	VUS	LIKELY BENIGN	LIKELY BENIGN	BP1 | BP4 | PM2
BRCA2	32912475G>A	3983G>A	S1328N	missense	rs753690365	Benign	LIKELY BENIGN	LIKELY BENIGN	LIKELY BENIGN	BS1 | BP1 | BP4
BRCA2	32912481A>G	3989A>G	N1330S	missense	.	VUS	LIKELY BENIGN	LIKELY BENIGN	LIKELY BENIGN	BP1 | BP4 | PM2
BRCA2	32912511AT>A	4021delT	S1341fs	frameshift variant	rs397507702	Pathogenic	PATHOGENIC	PATHOGENIC	PATHOGENIC	PVS1 | PS1 | PM2 | PP5	HRD deficient (high)
BRCA2	32912514C>A	4022C>A	S1341*	stop gained	.	Pathogenic	PATHOGENIC	PATHOGENIC	PATHOGENIC	PVS1 | PS1 | PM2 | PP5	HRD deficient (high)
BRCA2	32912553C>T	4061C>T	T1354M	missense	rs80358656	Benign	BENIGN	BENIGN	BENIGN	BS1 | BS3 | BP1 | BP4 | BP6	neutral
BRCA2	32912568C>T	4076C>T	T1359I	missense	.	VUS	VUS	LIKELY BENIGN	LIKELY BENIGN	BP1 | BP4 | PM2
BRCA2	32912579A>G	4087A>G	N1363D	missense	.	VUS		LIKELY BENIGN	LIKELY BENIGN	BP1 | BP4 | PM2
BRCA2	32912596A>G	4104A>G	L1368=	synonymous codon	.	VUS		VUS	VUS	PM2
BRCA2	32912610T>C	4118T>C	M1373T	missense	rs750581150	VUS	VUS	LIKELY BENIGN	LIKELY BENIGN	BP1 | BP4 | PM2
BRCA2	32912625C>G	4133C>G	T1378S	missense	.	VUS		LIKELY BENIGN	LIKELY BENIGN	BP1 | BP4 | PM2
BRCA2	32912629G>T	4137G>T	Q1379H	missense	.	VUS	VUS	VUS	VUS	PM2 |BP1
BRCA2	32912638A>T	4146A>T	E1382D	missense	.	VUS		VUS	VUS	PM2 |BP1
BRCA2	32912655CTTTT>C	4166_4169delTTTT	F1389fs	frameshift variant	.	Pathogenic		LIKELY PATHOGENIC	LIKELY PATHOGENIC	PVS1 | PM2	HRD deficient (high)
BRCA2	32912670C>T	4178C>T	A1393V	missense	rs398122776	Benign	VUS	LIKELY BENIGN	LIKELY BENIGN	BP1 | BP4
BRCA2	32912671G>A	4179G>A	A1393=	synonymous codon	rs770531115	Benign	LIKELY BENIGN	LIKELY BENIGN	LIKELY BENIGN	BS1
BRCA2	32912687T>C	4195T>C	C1399R	missense	rs730881530	VUS	VUS	LIKELY BENIGN	LIKELY BENIGN	BP1 | BP4 | PM2
BRCA2	32912692T>G	4200T>G	H1400Q	missense	.	VUS		LIKELY BENIGN	LIKELY BENIGN	BP1 | BP4 | PM2
BRCA2	32912698T>C	4206T>C	N1402=	synonymous codon	.	Benign	LIKELY BENIGN	VUS	LIKELY BENIGN	PM2
BRCA2	32912705A>G	4213A>G	N1405D	missense	.	VUS	VUS	LIKELY BENIGN	LIKELY BENIGN	BP1 | BP4 | PM2
BRCA2	32912714C>G	4222C>G	Q1408E	missense	.	VUS		LIKELY BENIGN	LIKELY BENIGN	BP1 | BP4 | PM2
BRCA2	32912733C>T	4241C>T	T1414M	missense	rs70953664	Benign	BENIGN	LIKELY BENIGN	BENIGN	BS1 | BP1 | BP4 | BP6
BRCA2	32912734G>A	4242G>A	T1414=	synonymous codon	.	Benign	LIKELY BENIGN	VUS	LIKELY BENIGN	PM2
BRCA2	32912737G>A	4245G>A	E1415=	synonymous codon	rs786201111	Benign	LIKELY BENIGN	VUS	LIKELY BENIGN	PM2
BRCA2	32912751ATTTTGAGACTTCTGATACAT>A	4264_4283delGAGACTTCTGATACATTTTT	E1422fs	frameshift variant	.	Pathogenic		LIKELY PATHOGENIC	LIKELY PATHOGENIC	PVS1 | PM2	HRD deficient (high)
BRCA2	32912757A>G	4265A>G	E1422G	missense	.	VUS		LIKELY BENIGN	LIKELY BENIGN	BP1 | BP4 | PM2
BRCA2	32912785A>G	4293A>G	A1431=	synonymous codon	rs786201516	Benign	LIKELY BENIGN	VUS	LIKELY BENIGN	PM2
BRCA2	32912806C>T	4314C>T	V1438=	synonymous codon	rs730881590	Benign	LIKELY BENIGN	LIKELY BENIGN	LIKELY BENIGN	BS1
BRCA2	32912812A>C	4320A>C	K1440N	missense	rs769535925	VUS	VUS	LIKELY BENIGN	LIKELY BENIGN	BS1 | BP1 |PP3
BRCA2	32912830TG>T	4339delG	V1447*	stop gained	rs80359443	Pathogenic	PATHOGENIC	PATHOGENIC	PATHOGENIC	PVS1 | PS1 | PM2 | PP5	HRD deficient (high)
BRCA2	32912857A>G	4365A>G	E1455=	synonymous codon	.	VUS	LIKELY BENIGN	VUS	VUS	PM2
BRCA2	32912858G>A	4366G>A	E1456K	missense	.	VUS	VUS	VUS	VUS	PM2 |BP1
BRCA2	32912859A>C	4367A>C	E1456A	missense	.	VUS	VUS	VUS	VUS	PM2 |BP1
BRCA2	32912868A>G	4376A>G	N1459S	missense	rs117187202	Benign	VUS	LIKELY BENIGN	LIKELY BENIGN	BS1 | BP1 | BP4
BRCA2	32912891C>T	4399C>T	H1467Y	missense	.	VUS	VUS	LIKELY BENIGN	LIKELY BENIGN	BP1 | BP4 | PM2
BRCA2	32912919A>G	4427A>G	D1476G	missense	rs745425169	VUS	VUS	VUS	VUS	BP1
BRCA2	32912923T>C	4431T>C	I1477=	synonymous codon	.	VUS	LIKELY BENIGN	VUS	LIKELY BENIGN	PM2
BRCA2	32912962A>G	4470A>G	I1490M	missense	.	VUS		LIKELY BENIGN	LIKELY BENIGN	BP1 | BP4 | PM2
BRCA2	32912974T>C	4482T>C	S1494=	synonymous codon	.	VUS		VUS	VUS	PM2
BRCA2	32912977C>G	4485C>G	V1495=	synonymous codon	.	VUS		VUS	VUS	PM2
BRCA2	32913023G>A	4531G>A	E1511K	missense	rs376338226	VUS	VUS	LIKELY BENIGN	LIKELY BENIGN	BS1 | BP1 | BP4
BRCA2	32913026C>T	4534C>T	R1512C	missense	rs80358684	VUS	VUS	LIKELY BENIGN	LIKELY BENIGN	BP1 | BP4 | PM2
BRCA2	32913027G>A	4535G>A	R1512H	missense	rs80358685	VUS	VUS	LIKELY BENIGN	LIKELY BENIGN	BP1 | BP4 | PM2
BRCA2	32913029GATGA>G	4539_4542delTGAA	D1513fs	frameshift variant	.	Pathogenic		LIKELY PATHOGENIC	LIKELY PATHOGENIC	PVS1 | PM2	HRD deficient (high)
BRCA2	32913070A>G	4578A>G	T1526=	synonymous codon	rs202022822	Benign	BENIGN	LIKELY BENIGN	BENIGN	BS1 | BP6
BRCA2	32913071G>C	4579G>C	A1527P	missense	.	VUS		VUS	VUS	PM2 | PP3 | BP1
BRCA2	32913077G>A	4585G>A	G1529R	missense	rs28897728	Benign	BENIGN	BENIGN	BENIGN	BS1 | BS3 | BP1| BP6 | PP3	neutral
BRCA2	32913091A>C	4599A>C	K1533N	missense	rs80358694	Benign	VUS	LIKELY BENIGN	LIKELY BENIGN	BS1 | BP1 | BP4
BRCA2	32913102A>T	4610A>T	E1537V	missense	.	VUS		VUS	VUS	PM2 |BP1
BRCA2	32913103A>G	4611A>G	E1537=	synonymous codon	.	VUS		VUS	VUS	PM2
BRCA2	32913138AAG>A	4649_4650delAG	E1550fs	frameshift variant	.	Pathogenic		LIKELY PATHOGENIC	LIKELY PATHOGENIC	PVS1 | PM2	HRD deficient (high)
BRCA2	32913192T>C	4700T>C	L1567P	missense	.	VUS		VUS	VUS	PM2 |BP1
BRCA2	32913220T>A	4728T>A	L1576=	synonymous codon	.	VUS		VUS	VUS	PM2
BRCA2	32913272A>G	4780A>G	M1594V	missense	.	VUS		LIKELY BENIGN	LIKELY BENIGN	BP1 | BP4 | PM2
BRCA2	32913314G>T	4822G>T	E1608*	stop gained	.	Pathogenic		LIKELY PATHOGENIC	LIKELY PATHOGENIC	PVS1 | PM2	HRD deficient (high)
BRCA2	32913346T>A	4854T>A	D1618E	missense	rs80358708	VUS	VUS	LIKELY BENIGN	LIKELY BENIGN	BS1 | BP1 | BP4
BRCA2	32913391CTT>C	4903_4904delTT	L1635fs	frameshift variant	.	Pathogenic		LIKELY PATHOGENIC	LIKELY PATHOGENIC	PVS1 | PM2	HRD deficient (high)
BRCA2	32913407G>A	4915G>A	V1639I	missense	rs80358716	VUS	VUS	VUS	VUS	PM2 |BP1
BRCA2	32913419G>A	4927G>A	V1643I	missense	.	VUS	VUS	LIKELY BENIGN	LIKELY BENIGN	BP1 | BP4 | PM2
BRCA2	32913442TC>T	4952delC	P1651fs	frameshift variant	rs397507752	Pathogenic	PATHOGENIC	PATHOGENIC	PATHOGENIC	PVS1 | PS1 | PM2 | PP5	HRD deficient (high)
BRCA2	32913457C>A	4965C>A	Y1655*	stop gained	rs80358721	Pathogenic	PATHOGENIC	PATHOGENIC	PATHOGENIC	PVS1 | PS1 | PM2 | PP5	HRD deficient (high)
BRCA2	32913469C>A	4977C>A	S1659=	synonymous codon	.	VUS		VUS	VUS	PM2
BRCA2	32913507A>G	5015A>G	Y1672C	missense	.	VUS		LIKELY BENIGN	LIKELY BENIGN	BP1 | BP4 | PM2
BRCA2	32913508C>T	5016C>T	Y1672=	synonymous codon	.	VUS		VUS	VUS	PM2
BRCA2	32913518A>G	5026A>G	S1676G	missense	.	VUS		LIKELY BENIGN	LIKELY BENIGN	BP1 | BP4 | PM2
BRCA2	32913552T>C	5060T>C	L1687P	missense	.	VUS		VUS	VUS	PM2 |BP1
BRCA2	32913591G>T	5099G>T	G1700V	missense	.	VUS		LIKELY BENIGN	LIKELY BENIGN	BP1 | BP4 | PM2
BRCA2	32913595A>G	5103A>G	Q1701=	synonymous codon	.	VUS		VUS	VUS	PM2
BRCA2	32913597CAGAA>C	5110_5113delAGAA	R1704*	stop gained	.	Pathogenic	PATHOGENIC	PATHOGENIC	PATHOGENIC	PVS1 | PS1 | PP5 | BS1	HRD deficient (high)
BRCA2	32913662A>G	5170A>G	I1724V	missense	rs35335654	Benign	LIKELY BENIGN	LIKELY BENIGN	LIKELY BENIGN	BS1 | BP1 | BP4
BRCA2	32913674G>A	5182G>A	D1728N	missense	rs80358744	VUS	VUS	LIKELY BENIGN	LIKELY BENIGN	BP1 | BP4 | PM2
BRCA2	32913691C>T	5199C>T	S1733=	synonymous codon	rs28897734	Benign	BENIGN	VUS	BENIGN	BP6
BRCA2	32913692G>A	5200G>A	E1734K	missense	rs786202543	VUS	VUS	LIKELY BENIGN	LIKELY BENIGN	BP1 | BP4 | PM2
BRCA2	32913693A>T	5201A>T	E1734V	missense	.	VUS		LIKELY BENIGN	LIKELY BENIGN	BS1 | BP1
BRCA2	32913718C>G	5226C>G	N1742K	missense	.	Benign		LIKELY BENIGN	LIKELY BENIGN	BP1 | BP4 | PM2
BRCA2	32913763T>A	5271T>A	Y1757*	stop gained	.	Pathogenic	PATHOGENIC	PATHOGENIC	PATHOGENIC	PVS1 | PM2 | PP5	HRD deficient (high)
BRCA2	32913774G>T	5282G>T	G1761V	missense	.	VUS		VUS	VUS	PM2 |BP1
BRCA2	32913775A>T	5283A>T	G1761=	synonymous codon	.	VUS		VUS	VUS	PM2
BRCA2	32913787A>C	5295A>C	K1765N	missense	.	VUS		LIKELY BENIGN	LIKELY BENIGN	BP1 | BP4 | PM2
BRCA2	32913804G>C	5312G>C	G1771A	missense	.	VUS		VUS	VUS	BP1
BRCA2	32913809G>C	5317G>C	E1773Q	missense	.	VUS		LIKELY BENIGN	LIKELY BENIGN	BP1 | BP4 | PM2
BRCA2	32913870A>G	5378A>G	N1793S	missense	rs80358759	VUS	VUS	LIKELY BENIGN	LIKELY BENIGN	BP1 | BP4
BRCA2	32913901T>C	5409T>C	T1803=	synonymous codon	.	VUS		VUS	VUS	PM2
BRCA2	32913911G>C	5419G>C	D1807H	missense	.	VUS		VUS	VUS	PM2 |BP1
BRCA2	32913920G>A	5428G>A	V1810I	missense	rs80358766	VUS	VUS	VUS	VUS	BP1
BRCA2	32913966C>T	5474C>T	A1825V	missense	rs397507352	Benign	VUS	LIKELY BENIGN	LIKELY BENIGN	BS1 | BP1 | BP4
BRCA2	32913970CATTAA>C	5482_5486delAAATT	K1828fs	frameshift variant	rs80359516	Pathogenic	PATHOGENIC	PATHOGENIC	PATHOGENIC	PVS1 | PS1 | PM2 | PP5	HRD deficient (high)
BRCA2	32913976A>G	5484A>G	K1828=	synonymous codon	.	VUS	LIKELY BENIGN	VUS	VUS	PM2
BRCA2	32913982C>G	5490C>G	S1830=	synonymous codon	.	VUS	LIKELY BENIGN	VUS	VUS	PM2
BRCA2	32913987C>A	5495C>A	S1832Y	missense	rs138489917	VUS	VUS	LIKELY BENIGN	LIKELY BENIGN	BS1 | BP1
BRCA2	32914007G>A	5515G>A	V1839I	missense	rs776630512	VUS	VUS	LIKELY BENIGN	LIKELY BENIGN	BP1 | BP4 | PM2
BRCA2	32914021A>T	5529A>T	A1843=	synonymous codon	rs372951842	VUS	LIKELY BENIGN	LIKELY BENIGN	LIKELY BENIGN	BS1
BRCA2	32914046G>A	5554G>A	V1852I	missense	rs80358777	VUS	VUS	LIKELY BENIGN	LIKELY BENIGN	BP1 | BP4
BRCA2	32914048TTG>T	5560_5561delGT	V1854fs	frameshift variant	rs397507787	Pathogenic	PATHOGENIC	PATHOGENIC	PATHOGENIC	PVS1 | PS1 | PM2 | PP5	HRD deficient (high)
BRCA2	32914065CAATT>C	5576_5579delTTAA	I1859fs	frameshift variant	rs770318608	Pathogenic	PATHOGENIC	PATHOGENIC	PATHOGENIC	PVS1 | PS1 | PP5	HRD deficient (high)
BRCA2	32914120AAAC>A	5632_5634delAAC	N1878del	cds indel	rs771028475	VUS	VUS	VUS	VUS	PM4
BRCA2	32914127G>T	5635G>T	E1879*	stop gained	rs55996097	Pathogenic	PATHOGENIC	PATHOGENIC	PATHOGENIC	PVS1 | PS1 | PP5	HRD deficient (high)
BRCA2	32914137C>A	5645C>A	S1882*	stop gained	rs80358785	Pathogenic	PATHOGENIC	PATHOGENIC	PATHOGENIC	PVS1 | PS1 | PP5	HRD deficient (high)
BRCA2	32914152C>T	5660C>T	T1887M	missense	rs397507795	VUS	VUS	LIKELY BENIGN	LIKELY BENIGN	BS1 | BP1 | BP4
BRCA2	32914165AG>A	5675delG	G1892fs	frameshift variant	.	Pathogenic		LIKELY PATHOGENIC	LIKELY PATHOGENIC	PVS1 | PM2	HRD deficient (high)
BRCA2	32914166GGTT>G	5678_5680delGTT	C1893del	cds indel	.	VUS		VUS	VUS	PM2 | PM4
BRCA2	32914174C>G	5682C>G	Y1894*	stop gained	rs41293497	Pathogenic	PATHOGENIC	PATHOGENIC	PATHOGENIC	PVS1 | PS1 | PP5	HRD deficient (high)
BRCA2	32914175G>A	5683G>A	E1895K	missense	rs146351301	Benign	VUS	LIKELY BENIGN	LIKELY BENIGN	BS1 | BP1 | BP4															x
BRCA2	32914199A>G	5707A>G	I1903V	missense	.	VUS	VUS	LIKELY BENIGN	LIKELY BENIGN	BP1 | BP4 | PM2
BRCA2	32914200T>C	5708T>C	I1903T	missense	rs149474191	Benign	VUS	VUS	VUS	BP1
BRCA2	32914206A>G	5714A>G	H1905R	missense	rs80358796	VUS	VUS	LIKELY BENIGN	LIKELY BENIGN	BP1 | BP4 | PM2
BRCA2	32914209ACT>A	5722_5723delCT	L1908fs	frameshift variant	rs80359530	Pathogenic	PATHOGENIC	PATHOGENIC	PATHOGENIC	PVS1 | PS1 | PM2 | PP5	HRD deficient (high)
BRCA2	32914229T>G	5737T>G	C1913G	missense	rs80358799	VUS	VUS	LIKELY BENIGN	LIKELY BENIGN	BP1 | BP4 | PM2
BRCA2	32914233G>T	5741G>T	S1914I	missense	.	VUS		LIKELY BENIGN	LIKELY BENIGN	BP1 | BP4 | PM2
BRCA2	32914245A>G	5753A>G	H1918R	missense	rs80358804	VUS	VUS	LIKELY BENIGN	LIKELY BENIGN	BS1 | BP1 | BP4
BRCA2	32914260ACATT>A	5771_5774delTTCA	I1924fs	frameshift variant	rs80359535	Pathogenic	PATHOGENIC	PATHOGENIC	PATHOGENIC	PVS1 | PS1 | PM2 | PP5	HRD deficient (high)
BRCA2	32914277A>G	5785A>G	I1929V	missense	rs79538375	Benign	BENIGN	BENIGN	BENIGN	BS1 | BS3 | BP1| BP4 | BP6	neutral
BRCA2	32914285A>G	5793A>G	Q1931=	synonymous codon	rs371682489	Benign	LIKELY BENIGN	LIKELY BENIGN	LIKELY BENIGN	BS1
BRCA2	32914328T>C	5836T>C	S1946P	missense	rs80358811	VUS	VUS	LIKELY BENIGN	LIKELY BENIGN	BS1 | BP1 | BP4
BRCA2	32914392A>T	5900A>T	K1967M	missense	.	VUS	VUS	VUS	VUS	PM2 |BP1
BRCA2	32914461A>C	5969A>C	D1990A	missense	rs148618542	Benign	VUS	LIKELY BENIGN	LIKELY BENIGN	BS1 | BP1
BRCA2	32914464C>T	5972C>T	A1991V	missense	rs80358829	VUS		VUS	VUS	PM2 |BP1
BRCA2	32914468A>G	5976A>G	S1992=	synonymous codon	rs748854546	Benign	LIKELY BENIGN	VUS	LIKELY BENIGN	-
BRCA2	32914477C>T	5985C>T	N1995=	synonymous codon	rs374620036	VUS	LIKELY BENIGN	VUS	LIKELY BENIGN	-
BRCA2	32914478G>C	5986G>C	A1996P	missense	.	VUS		VUS	VUS	PP3 | BP1
BRCA2	32914485A>C	5993A>C	Q1998P	missense	rs80358835	VUS	VUS	VUS	VUS	PM2 |BP1
BRCA2	32914503AAGAT>A	6014_6017delATAG	D2005fs	frameshift variant	.	Pathogenic	PATHOGENIC	PATHOGENIC	PATHOGENIC	PVS1 | PS1 | PM2 | PP5	HRD deficient (high)
BRCA2	32914521T>G	6029T>G	V2010G	missense	rs80358839	VUS	VUS	LIKELY BENIGN	LIKELY BENIGN	BS1 | BP1 | BP4
BRCA2	32914536T>C	6044T>C	L2015S	missense	.	VUS	VUS	LIKELY BENIGN	LIKELY BENIGN	BP1 | BP4 | PM2
BRCA2	32914551A>G	6059A>G	E2020G	missense	.	VUS		VUS	VUS	PM2 |BP1
BRCA2	32914591A>G	6099A>G	I2033M	missense	rs80358848	VUS	VUS	LIKELY BENIGN	LIKELY BENIGN	BP1 | BP4 | PM2
BRCA2	32914592C>T	6100C>T	R2034C	missense	rs1799954	Benign	BENIGN	BENIGN	BENIGN	BS1 | BS3 | BP1| BP4 | BP6	neutral
BRCA2	32914593G>A	6101G>A	R2034H	missense	rs80358849	VUS	VUS	LIKELY BENIGN	LIKELY BENIGN	BP1 | BP4 | PM2
BRCA2	32914606T>C	6114T>C	H2038=	synonymous codon	rs786203600	Benign	LIKELY BENIGN	VUS	LIKELY BENIGN	PM2
BRCA2	32914609A>C	6117A>C	L2039F	missense	.	VUS	VUS	VUS	VUS	PM2 |BP1
BRCA2	32914613T>C	6121T>C	S2041P	missense	.	VUS	VUS	LIKELY BENIGN	LIKELY BENIGN	BP1 | BP4 | PM2
BRCA2	32914623G>T	6131G>T	G2044V	missense	rs56191579	Benign	VUS	BENIGN	BENIGN	BA1 | BP1	neutral
BRCA2	32914630A>G	6138A>G	S2046=	synonymous codon	.	VUS		VUS	VUS	PM2
BRCA2	32914632A>G	6140A>G	Y2047C	missense	rs730881542	VUS	VUS	LIKELY BENIGN	LIKELY BENIGN	BP1 | BP4 | PM2
BRCA2	32914640G>A	6148G>A	V2050I	missense	rs80358854	VUS	VUS	LIKELY BENIGN	LIKELY BENIGN	BP1 | BP4 | PM2
BRCA2	32914648A>G	6156A>G	S2052=	synonymous codon	.	Benign	LIKELY BENIGN	VUS	LIKELY BENIGN	PM2
BRCA2	32914657C>G	6165C>G	F2055L	missense	.	VUS	VUS	LIKELY BENIGN	LIKELY BENIGN	BP1 | BP4 | PM2
BRCA2	32914664T>C	6172T>C	F2058L	missense	.	VUS		VUS	VUS	PM2 | PP3 | BP1
BRCA2	32914672A>G	6180A>G	T2060=	synonymous codon	.	VUS		VUS	VUS	PM2
BRCA2	32914687A>G	6195A>G	Q2065=	synonymous codon	.	VUS	LIKELY BENIGN	VUS	VUS	PM2
BRCA2	32914703A>G	6211A>G	S2071G	missense	.	VUS		VUS	VUS	PM2 | PP3 | BP1
BRCA2	32914725G>T	6233G>T	G2078V	missense	rs769883812	VUS	VUS	VUS	VUS	PP3 | BP1
BRCA2	32914734AG>A	6244delG	E2082fs	frameshift variant	.	Pathogenic		LIKELY PATHOGENIC	LIKELY PATHOGENIC	PVS1 | PM2	HRD deficient (high)
BRCA2	32914736G>T	6244G>T	E2082*	stop gained	.	Pathogenic	PATHOGENIC	PATHOGENIC	PATHOGENIC	PVS1 | PS1 | PM2 | PP5	HRD deficient (high)
BRCA2	32914769C>T	6277C>T	H2093Y	missense	.	VUS		LIKELY BENIGN	LIKELY BENIGN	BP1 | BP4 | PM2
BRCA2	32914782C>T	6290C>T	T2097M	missense	rs80358866	VUS	VUS	LIKELY BENIGN	LIKELY BENIGN	BS1 | BP1
BRCA2	32914790CA>C	6302delA	N2101fs	frameshift variant	rs397507839	Pathogenic	PATHOGENIC	PATHOGENIC	PATHOGENIC	PVS1 | PS1 | PM2 | PP5	HRD deficient (high)
BRCA2	32914814C>T	6322C>T	R2108C	missense	rs55794205	Benign	LIKELY BENIGN	LIKELY BENIGN	LIKELY BENIGN	BS1 | BP1 |BP4 | PS3	likely HRD proficient
BRCA2	32914817G>A	6325G>A	V2109I	missense	rs79456940	Benign	VUS	LIKELY BENIGN	LIKELY BENIGN	BS1 | BP1 | BP4
BRCA2	32914839AC>A	6348delC	C2117fs	frameshift variant	.	Pathogenic		LIKELY PATHOGENIC	LIKELY PATHOGENIC	PVS1 | PM2	HRD deficient (high)
BRCA2	32914841T>G	6349T>G	C2117G	missense	.	VUS		LIKELY BENIGN	LIKELY BENIGN	BP1 | BP4 | PM2
BRCA2	32914876A>G	6384A>G	K2128=	synonymous codon	.	VUS	LIKELY BENIGN	VUS	VUS	PM2
BRCA2	32914892A>G	6400A>G	N2134D	missense	.	VUS		LIKELY BENIGN	LIKELY BENIGN	BP1 | BP4 | PM2
BRCA2	32914893ATAACT>A	6405_6409delCTTAA	N2135fs	frameshift variant	rs80359584	Pathogenic	PATHOGENIC	PATHOGENIC	PATHOGENIC	PVS1 | PS1 | PP5 | BS1	HRD deficient (high)
BRCA2	32914915T>G	6423T>G	G2141=	synonymous codon	rs780721021	VUS	VUS	VUS	VUS	PM2
BRCA2	32914936TATTAA>T	6446_6450delTTAAA	I2149fs	frameshift variant	rs80359593	Pathogenic	PATHOGENIC	PATHOGENIC	PATHOGENIC	PVS1 | PS1 | PM2 | PP5	HRD deficient (high)
BRCA2	32914947C>G	6455C>G	S2152C	missense	.	VUS		VUS	VUS	PM2 |BP1
BRCA2	32914951A>T	6459A>T	P2153=	synonymous codon	.	VUS	LIKELY BENIGN	VUS	VUS	PM2
BRCA2	32914953ATC>A	6468_6469delTC	Q2157fs	frameshift variant	rs80359596	Pathogenic	PATHOGENIC	PATHOGENIC	PATHOGENIC	PVS1 | PS1 | PM2 | PP5	HRD deficient (high)
BRCA2	32914963AT>A	6474delT	Q2159fs	frameshift variant	.	Pathogenic		LIKELY PATHOGENIC	LIKELY PATHOGENIC	PVS1 | PM2	HRD deficient (high)
BRCA2	32914973G>A	6481G>A	D2161N	missense	.	VUS		LIKELY BENIGN	LIKELY BENIGN	BP1 | BP4 | PM2
BRCA2	32914995G>A	6503G>A	G2168E	missense	rs397507372	VUS		LIKELY BENIGN	LIKELY BENIGN	BP1 | BP4 | PM2
BRCA2	32915025A>G	6533A>G	H2178R	missense	.	VUS		LIKELY BENIGN	LIKELY BENIGN	BP1 | BP4 | PM2
BRCA2	32915085A>T	6593A>T	E2198V	missense	.	VUS		VUS	VUS	PM2 |BP1
BRCA2	32915106T>G	6614T>G	V2205G	missense	rs730881546	VUS	VUS	VUS	VUS	PM2 |BP1
BRCA2	32915114AAT>A	6626_6627delTA	I2209fs	frameshift variant	rs80359610	Pathogenic	PATHOGENIC	PATHOGENIC	PATHOGENIC	PVS1 | PS1 | PM2 | PP5	HRD deficient (high)
BRCA2	32915129T>C	6637T>C	S2213P	missense	rs80358890	Benign		LIKELY BENIGN	LIKELY BENIGN	BP1 | BP4 | PM2
BRCA2	32915141A>T	6649A>T	K2217*	stop gained	.	Pathogenic		LIKELY PATHOGENIC	LIKELY PATHOGENIC	PVS1 | PM2	HRD deficient (high)
BRCA2	32915148C>A	6656C>A	S2219*	stop gained	.	Pathogenic		PATHOGENIC	PATHOGENIC	PVS1 | PS1 | PM2	HRD deficient (high)
BRCA2	32915180A>C	6688A>C	I2230L	missense	.	VUS		VUS	VUS	PM2 |BP1
BRCA2	32915188AG>A	6697delG	A2233fs	frameshift variant	.	Pathogenic		PATHOGENIC	PATHOGENIC	PVS1 | PS1 | PM2	HRD deficient (high)
BRCA2	32915205A>T	6713A>T	D2238V	missense	.	VUS		VUS	VUS	PM2 |BP1
BRCA2	32915212GAC>G	6722_6723delCA	T2241fs	frameshift variant	.	Pathogenic		LIKELY PATHOGENIC	LIKELY PATHOGENIC	PVS1 | PM2	HRD deficient (high)
BRCA2	32915228C>G	6736C>G	P2246A	missense	.	VUS		LIKELY BENIGN	LIKELY BENIGN	BP1 | BP4 | PM2
BRCA2	32915230A>G	6738A>G	P2246=	synonymous codon	rs760272304	Benign	LIKELY BENIGN	LIKELY BENIGN	LIKELY BENIGN	BS1
BRCA2	32915249C>G	6757C>G	L2253V	missense	.	VUS	LIKELY BENIGN	LIKELY BENIGN	LIKELY BENIGN	BP1 | BP4 | PM2
BRCA2	32915263C>T	6771C>T	P2257=	synonymous codon	rs373696964	Benign	LIKELY BENIGN	LIKELY BENIGN	LIKELY BENIGN	BS1
BRCA2	32915264G>A	6772G>A	E2258K	missense	rs730881549	VUS	VUS	LIKELY BENIGN	LIKELY BENIGN	BP1 | BP4
BRCA2	32915292C>G	6800C>G	S2267*	stop gained	.	Pathogenic	PATHOGENIC	PATHOGENIC	PATHOGENIC	PVS1 | PS1 | PM2 | PP5	HRD deficient (high)
BRCA2	32915300G>C	6808G>C	G2270R	missense	.	VUS		LIKELY BENIGN	LIKELY BENIGN	BP1 | BP4 | PM2
BRCA2	32915315G>A	6823G>A	E2275K	missense	rs587782362	VUS	VUS	LIKELY BENIGN	LIKELY BENIGN	BP1 | BP4 | PM2
BRCA2	32915319C>T	6827C>T	P2276L	missense	.	VUS		LIKELY BENIGN	LIKELY BENIGN	BP1 | BP4 | PM2
BRCA2	32915326C>A	6834C>A	I2278=	synonymous codon	.	VUS		VUS	VUS	PM2
BRCA2	32915333G>A	6841G>A	G2281R	missense	.	VUS	VUS	VUS	VUS	PM2 | PP3 | BP1
BRCA2	32918699AC>A	6849delC	S2284fs	frameshift variant	rs761744738	Pathogenic		LIKELY PATHOGENIC	LIKELY PATHOGENIC	PVS1 | PM2	HRD deficient (high)
BRCA2	32918775A>T	6922A>T	K2308*	stop gained	.	Pathogenic		LIKELY PATHOGENIC	LIKELY PATHOGENIC	PVS1 | PM2	HRD deficient (high)
BRCA2	32920978C>T	6952C>T	R2318*	stop gained	rs80358920	Pathogenic	PATHOGENIC	PATHOGENIC	PATHOGENIC	PVS1 | PS1 | PM2 | PP5	HRD deficient (high)
BRCA2	32929001A>G	7011A>G	T2337=	synonymous codon	.	VUS		VUS	VUS	PM2
BRCA2	32929011C>T	7021C>T	R2341C	missense	rs41293505	VUS	VUS	VUS	VUS	BP1
BRCA2	32929024A>G	7034A>G	Q2345R	missense	.	VUS	VUS	LIKELY BENIGN	LIKELY BENIGN	BP1 | BP4 | PM2
BRCA2	32929040C>T	7050C>T	T2350=	synonymous codon	rs587780870	Benign	LIKELY BENIGN	VUS	LIKELY BENIGN	-
BRCA2	32929041G>A	7051G>A	A2351T	missense	rs80358930	VUS	VUS	LIKELY BENIGN	LIKELY BENIGN	BS1 | BP1 | BP4
BRCA2	32929042C>G	7052C>G	A2351G	missense	rs80358932	Benign	LIKELY BENIGN	BENIGN	BENIGN	BS1| BS3| BP1	neutral
BRCA2	32929056T>G	7066T>G	F2356V	missense	rs863224596	VUS	VUS	VUS	VUS	PM2 |BP1
BRCA2	32929111A>G	7121A>G	N2374S	missense	.	VUS	VUS	LIKELY BENIGN	LIKELY BENIGN	BS1 | BP1 | BP4
BRCA2	32929116G>A	7126G>A	A2376T	missense	rs730881552	VUS		LIKELY BENIGN	LIKELY BENIGN	BP1 | BP4
BRCA2	32929118A>G	7128A>G	A2376=	synonymous codon	.	VUS		VUS	VUS	PM2
BRCA2	32929127A>G	7137A>G	G2379=	synonymous codon	rs730881593	Benign	LIKELY BENIGN	VUS	LIKELY BENIGN	PM2
BRCA2	32929143G>GT	7156dupT	S2386fs	frameshift variant	rs80359639	Pathogenic	PATHOGENIC	PATHOGENIC	PATHOGENIC	PVS1 | PS1 | PM2 | PP5	HRD deficient (high)
BRCA2	32929153C>T	7163C>T	T2388I	missense	.	VUS		LIKELY BENIGN	LIKELY BENIGN	BP1 | BP4 | PM2
BRCA2	32929178G>A	7188G>A	L2396=	synonymous codon	rs587780871	Benign	LIKELY BENIGN	LIKELY BENIGN	LIKELY BENIGN	BS1
BRCA2	32929190C>T	7200C>T	G2400=	synonymous codon	.	VUS		VUS	VUS	PM2
BRCA2	32929196A>G	7206A>G	P2402=	synonymous codon	.	VUS	LIKELY BENIGN	VUS	VUS	PM2
BRCA2	32929232A>G	7242A>G	S2414=	synonymous codon	rs1799955	Benign	BENIGN	BENIGN	BENIGN	BA1 | BP6	neutral
BRCA2	32929297A>T	7307A>T	N2436I	missense	rs80358955	Benign	BENIGN	BENIGN	BENIGN	BS1 | BS3 | BP1| BP4 | BP6	neutral
BRCA2	32929299AT>A	7311delT	I2437fs	frameshift variant	.	Pathogenic		LIKELY PATHOGENIC	LIKELY PATHOGENIC	PVS1 | PM2	HRD deficient (high)
BRCA2	32929301T>C	7311T>C	I2437=	synonymous codon	.	VUS		VUS	VUS	PM2
BRCA2	32929327A>G	7337A>G	K2446R	missense	.	VUS		LIKELY BENIGN	LIKELY BENIGN	BP1 | BP4 | PM2
BRCA2	32929334G>A	7344G>A	K2448=	synonymous codon	.	VUS		VUS	VUS	PM2
BRCA2	32929353C>A	7363C>A	H2455N	missense	.	VUS		LIKELY BENIGN	LIKELY BENIGN	BP1 | BP4 | PM2
BRCA2	32929388A>G	7398A>G	A2466=	synonymous codon	rs863224311	Benign	LIKELY BENIGN	VUS	LIKELY BENIGN	PM2
BRCA2	32929401A>G	7411A>G	T2471A	missense	rs771087264	VUS	VUS	LIKELY BENIGN	LIKELY BENIGN	BS1 | BP1 | BP4
BRCA2	32929420C>CT	7433dupT	L2478fs	frameshift variant	rs779007406	VUS	PATHOGENIC	PATHOGENIC	PATHOGENIC	PVS1 | PS1 | PP5	HRD deficient (high)
BRCA2	32930564G>T	7436-1G>T		splice acceptor variant	.	Pathogenic		PATHOGENIC	PATHOGENIC	PVS1 | PM2 | PP3	HRD deficient (high)
BRCA2	32930598T>C	7469T>C	I2490T	missense	rs11571707	Benign	BENIGN	BENIGN	BENIGN	BA1 | BS3 | BP1 | BP4 | BP6	neutral
BRCA2	32930606A>T	7477A>T	M2493L	missense	.	VUS	VUS	VUS	VUS	PM2 |BP1
BRCA2	32930609C>T	7480C>T	R2494*	stop gained	rs80358972	Pathogenic	PATHOGENIC	PATHOGENIC	PATHOGENIC	PVS1 | PS1 | PP5 | BS1	HRD deficient (high)
BRCA2	32930633C>T	7504C>T	R2502C	missense	rs55716624	VUS	VUS	BENIGN	BENIGN	BS1 | BS3 | BP1 | BP4	neutral
BRCA2	32930634G>A	7505G>A	R2502H	missense	rs56070345	Benign	VUS	LIKELY BENIGN	LIKELY BENIGN	BS1 | BP1 | BP4
BRCA2	32930636G>A	7507G>A	V2503I	missense	rs587782191	VUS	VUS	LIKELY BENIGN	LIKELY BENIGN	BP1 | BP4
BRCA2	32930650A>G	7521A>G	P2507=	synonymous codon	rs759383358	VUS	BENIGN	LIKELY BENIGN	BENIGN	BS1 | BP6
BRCA2	32930651G>A	7522G>A	G2508S	missense	rs80358978	VUS	VUS	BENIGN	BENIGN	BS1 | BS3 | BP1 | PP3	neutral
BRCA2	32930668A>G	7539A>G	A2513=	synonymous codon	.	VUS		VUS	VUS	PM2
BRCA2	32930687C>T	7558C>T	R2520*	stop gained	rs80358981	Pathogenic	PATHOGENIC	PATHOGENIC	PATHOGENIC	PVS1 | PS1 | PP5 | BS1	HRD deficient (high)
BRCA2	32930713AG>A	7586delG	G2529fs	frameshift variant	.	Pathogenic		LIKELY PATHOGENIC	LIKELY PATHOGENIC	PVS1 | PM2	HRD deficient (high)
BRCA2	32931893C>T	7632C>T	G2544=	synonymous codon	rs551834979	Benign	LIKELY BENIGN	BENIGN	BENIGN	BS1 | BS3	neutral
BRCA2	32931917T>A	7656T>A	I2552=	synonymous codon	.	VUS		VUS	VUS	PM2
BRCA2	32931931CAG>C	7673_7674delAG	E2558fs	frameshift variant	rs80359672	Pathogenic	PATHOGENIC	PATHOGENIC	PATHOGENIC	PVS1 | PS1 | PM2 | PP5	HRD deficient (high)
BRCA2	32931951A>T	7690A>T	T2564S	missense	.	VUS		LIKELY BENIGN	LIKELY BENIGN	BP1 | BP4 | PM2
BRCA2	32931959T>C	7698T>C	D2566=	synonymous codon	.	VUS		VUS	VUS	PM2
BRCA2	32931967G>A	7706G>A	G2569D	missense	rs587781943	VUS	VUS	VUS	VUS	PM2 |BP1
BRCA2	32931977T>C	7716T>C	S2572=	synonymous codon	.	VUS		VUS	VUS	PM2
BRCA2	32931991A>G	7730A>G	K2577R	missense	.	VUS	VUS	LIKELY BENIGN	LIKELY BENIGN	BP1 | BP4 | PM2
BRCA2	32932019G>C	7758G>C	W2586C	missense	.	VUS		VUS	VUS	PM2 | PP3 | BP1
BRCA2	32932039G>A	7778G>A	G2593E	missense	.	VUS		VUS	VUS	PM2 | PP3 | BP1
BRCA2	32936676C>A	7822C>A	P2608T	missense	.	VUS		VUS	VUS	PM2 | PP3 | BP1
BRCA2	32936699T>C	7845T>C	I2615=	synonymous codon	.	VUS		VUS	VUS	PM2
BRCA2	32936701C>T	7847C>T	S2616F	missense	.	VUS		VUS	VUS	PM2 | PP3 | BP1
BRCA2	32936727A>C	7873A>C	R2625=	synonymous codon	.	VUS		VUS	VUS	PM2
BRCA2	32936786T>C	7932T>C	N2644=	synonymous codon	.	VUS	LIKELY BENIGN	VUS	VUS	PM2
BRCA2	32936805A>AG	7954dupG	V2652fs	frameshift variant	.	Pathogenic		LIKELY PATHOGENIC	LIKELY PATHOGENIC	PVS1 | PM2	HRD deficient (high)
BRCA2	32936823A>T	7969A>T	K2657*	stop gained	.	Pathogenic		LIKELY PATHOGENIC	LIKELY PATHOGENIC	PVS1 | PM2	HRD deficient (high)
BRCA2	32937350G>A	8011G>A	A2671T	missense	.	VUS		VUS	VUS	PM2 | PP3 | BP1
BRCA2	32937362A>G	8023A>G	I2675V	missense	rs397507954	Pathogenic	LIKELY PATHOGENIC	LIKELY PATHOGENIC	LIKELY PATHOGENIC	PS3 | PM2 | PP3 | PP5 | BP1	likely HRD proficient
BRCA2	32937379C>G	8040C>G	D2680E	missense	.	VUS	VUS	VUS	VUS	PM2 |BP1
BRCA2	32937398G>A	8059G>A	V2687I	missense	.	VUS	VUS	VUS	VUS	PM2 |BP1
BRCA2	32937438T>C	8099T>C	I2700T	missense	rs587782365	VUS	VUS	LIKELY BENIGN	LIKELY BENIGN	BP1 | BP4 | PM2
BRCA2	32937453G>C	8114G>C	S2705T	missense	.	VUS		VUS	VUS	PM2 |BP1
BRCA2	32937468G>A	8129G>A	S2710N	missense	.	VUS		VUS	VUS	PM2 |BP1
BRCA2	32937478C>G	8139C>G	T2713=	synonymous codon	.	VUS		VUS	VUS	PM2
BRCA2	32937480A>T	8141A>T	Q2714L	missense	.	Benign		VUS	VUS	PM2 |BP1
BRCA2	32937504C>A	8165C>A	T2722K	missense	.	Pathogenic	LIKELY PATHOGENIC	VUS	LIKELY PATHOGENIC	PM2 | PM5 | PP3 | BP1
BRCA2	32937526G>T	8187G>T	K2729N	missense	rs80359065	Benign	BENIGN	BENIGN	BENIGN	BA1 | BS3 | BP1 | BP6 | PP3	neutral
BRCA2	32937544C>T	8205C>T	P2735=	synonymous codon	.	VUS		VUS	VUS	PM2
BRCA2	32937586G>A	8247G>A	Q2749=	synonymous codon	rs786202060	Benign	LIKELY BENIGN	VUS	LIKELY BENIGN	PM2
BRCA2	32937614G>A	8275G>A	V2759M	missense	.	VUS		LIKELY BENIGN	LIKELY BENIGN	BP1 | BP4 | PM2
BRCA2	32937638C>T	8299C>T	P2767S	missense	rs587782619	VUS	VUS	VUS	VUS	PM2 | PP3 | BP1
BRCA2	32937650C>T	8311C>T	P2771S	missense	.	VUS		VUS	VUS	PM2 |BP1
BRCA2	32937669A>G	8330A>G	K2777R	missense	.	VUS		VUS	VUS	PM2 | PP3 | BP1
BRCA2	32944556T>G	8349T>G	T2783=	synonymous codon	.	VUS		VUS	VUS	PM2
BRCA2	32944567G>A	8360G>A	R2787H	missense	rs80359078	VUS	VUS	BENIGN	BENIGN	BS1| BS3| BP1	neutral
BRCA2	32944586A>T	8379A>T	G2793=	synonymous codon	.	VUS		VUS	VUS	PM2
BRCA2	32944612C>T	8405C>T	P2802L	missense	.	VUS		VUS	VUS	PM2 |BP1
BRCA2	32944627C>T	8420C>T	S2807L	missense	rs55763607	VUS	VUS	BENIGN	BENIGN	BS1 | BS3| BP1| PP3	neutral
BRCA2	32944694G>A	8487G>A	Q2829=	synonymous codon	.	VUS		LIKELY PATHOGENIC	LIKELY PATHOGENIC	PS3 | PM2 | PP3	HRD deficient (high)
BRCA2	32944696T>C	8487+2T>C		splice donor variant	.	Pathogenic	PATHOGENIC	PATHOGENIC	PATHOGENIC	PVS1 | PM2 | PP5	HRD deficient (high)
BRCA2	32945109C>A	8504C>A	S2835*	stop gained	rs80359102	Pathogenic	PATHOGENIC	PATHOGENIC	PATHOGENIC	PVS1 | PS1 | PM2 | PP5	HRD deficient (high)
BRCA2	32945110A>G	8505A>G	S2835=	synonymous codon	rs765655952	VUS	LIKELY BENIGN	VUS	LIKELY BENIGN	-
BRCA2	32945124T>C	8519T>C	I2840T	missense	.	VUS	VUS	VUS	VUS	PM2 | PP3 | BP1
BRCA2	32945130G>A	8525G>A	R2842H	missense	rs80359105	Benign	BENIGN	BENIGN	BENIGN	BS1 | BS3 | BP1 | BP6 | PP3	neutral
BRCA2	32945167T>C	8562T>C	Y2854=	synonymous codon	rs786201333	Benign	LIKELY BENIGN	VUS	LIKELY BENIGN	PM2
BRCA2	32945176C>T	8571C>T	A2857=	synonymous codon	.	VUS		VUS	VUS	PM2
BRCA2	32945192G>GA	8589dupA	A2864fs	frameshift variant	.	Pathogenic		LIKELY PATHOGENIC	LIKELY PATHOGENIC	PVS1 | PM2	HRD deficient (high)
BRCA2	32945234G>T	8629G>T	E2877*	stop gained	rs80359121	Pathogenic	PATHOGENIC	PATHOGENIC	PATHOGENIC	PVS1 | PS1 | PM2 | PP5	HRD deficient (high)
BRCA2	32950809A>G	8635A>G	N2879D	missense	.	VUS		LIKELY BENIGN	LIKELY BENIGN	BP1 | BP4 | PM2
BRCA2	32950829A>G	8655A>G	L2885=	synonymous codon	.	VUS		VUS	VUS	PM2
BRCA2	32950837G>A	8663G>A	R2888H	missense	rs80359124	VUS	VUS	LIKELY BENIGN	LIKELY BENIGN	BP1 | BP4
BRCA2	32950840C>T	8666C>T	A2889V	missense	.	VUS		LIKELY BENIGN	LIKELY BENIGN	BP1 | BP4 | PM2
BRCA2	32950872G>T	8698G>T	D2900Y	missense	.	VUS		VUS	VUS	PM2 | PP3 | BP1
BRCA2	32950909C>G	8735C>G	A2912G	missense	.	VUS		VUS	VUS	PM2 |BP1
BRCA2	32950930T>A	8754+2T>A		splice donor variant	.	Pathogenic		PATHOGENIC	PATHOGENIC	PVS1 | PM2 | PP3	HRD deficient (high)
BRCA2	32953590G>C	8891G>C	R2964T	missense	.	VUS		VUS	VUS	PM2 | PP3 | BP1
BRCA2	32953598A>G	8899A>G	T2967A	missense	.	VUS		LIKELY BENIGN	LIKELY BENIGN	BP1 | BP4 | PM2
BRCA2	32953613T>C	8914T>C	L2972=	synonymous codon	.	VUS	LIKELY BENIGN	VUS	VUS	PM2
BRCA2	32953617G>A	8918G>A	R2973H	missense	rs80359143	Benign	VUS	LIKELY BENIGN	LIKELY BENIGN	BS1 | BP1 | PP3
BRCA2	32953632C>G	8933C>G	S2978*	stop gained	rs80359144	Pathogenic	PATHOGENIC	PATHOGENIC	PATHOGENIC	PVS1 | PS1 | PM2 | PP5	HRD deficient (high)
BRCA2	32953970A>T	9037A>T	T3013S	missense	.	VUS		VUS	VUS	PM2 |BP1
BRCA2	32953989A>C	9056A>C	K3019T	missense	.	VUS		LIKELY BENIGN	LIKELY BENIGN	BP1 | BP4 | PM2
BRCA2	32954009C>T	9076C>T	Q3026*	stop gained	rs80359159	Pathogenic	PATHOGENIC	PATHOGENIC	PATHOGENIC	PVS1 | PS1 | PM2 | PP5	HRD deficient (high)
BRCA2	32954012T>A	9079T>A	L3027I	missense	.	VUS		VUS	VUS	PM2 | PP3 | BP1
BRCA2	32954022C>CA	9097dupA	T3033fs	frameshift variant	rs397507419	Pathogenic	PATHOGENIC	PATHOGENIC	PATHOGENIC	PVS1 | PS1 | PM2 | PP5	HRD deficient (high)
BRCA2	32954037A>G	9104A>G	Y3035C	missense	rs80359165	VUS	VUS	BENIGN	BENIGN	BS1 | BS3| BP1| PP3	neutral
BRCA2	32954041A>G	9108A>G	Q3036=	synonymous codon	rs786203037	Benign	LIKELY BENIGN	VUS	LIKELY BENIGN	BS3 | PM2	neutral
BRCA2	32954042C>T	9109C>T	Q3037*	stop gained	rs397508037	Pathogenic	PATHOGENIC	PATHOGENIC	PATHOGENIC	PVS1 | PS1 | PM2 | PP5	HRD deficient (high)
BRCA2	32954050G>A	9117G>A	P3039=	synonymous codon	rs28897756	Pathogenic	PATHOGENIC	LIKELY PATHOGENIC	LIKELY PATHOGENIC	PS3 | PM2 | PP3 | PP5	HRD deficient (high)
BRCA2	32954181G>A	9155G>A	R3052Q	missense	rs80359171	Pathogenic	LIKELY BENIGN	LIKELY BENIGN	LIKELY BENIGN	BS3 | BP1 | PM5 | PP3	neutral
BRCA2	32954192C>T	9166C>T	H3056Y	missense	.	VUS		LIKELY BENIGN	LIKELY BENIGN	BP1 | BP4 | PM2
BRCA2	32954213C>T	9187C>T	P3063S	missense	rs80359176	VUS	VUS	LIKELY BENIGN	LIKELY BENIGN	BS3 | BP1| BP4	neutral
BRCA2	32954242G>A	9216G>A	V3072=	synonymous codon	rs773533016	VUS	VUS	VUS	VUS	BS3	neutral
BRCA2	32954246C>T	9220C>T	L3074=	synonymous codon	rs151275325	Benign	LIKELY BENIGN	VUS	LIKELY BENIGN	-
BRCA2	32954250T>C	9224T>C	I3075T	missense	.	VUS		VUS	VUS	PM2 |BP1
BRCA2	32954267G>A	9241G>A	V3081I	missense	.	VUS		LIKELY BENIGN	LIKELY BENIGN	BP1 | BP4 | PM2
BRCA2	32954272G>GA	9253dupA	T3085fs	frameshift variant	rs80359752	Pathogenic	PATHOGENIC	PATHOGENIC	PATHOGENIC	PVS1 | PS1 | PM2 | PP5	HRD deficient (high)
BRCA2	32954274A>G	9248A>G	K3083R	missense	.	VUS	VUS	LIKELY BENIGN	LIKELY BENIGN	BP1 | BP4 | PM2
BRCA2	32968839C>T	9270C>T	F3090=	synonymous codon	rs587780873	VUS	LIKELY BENIGN	VUS	LIKELY BENIGN	PM2
BRCA2	32968840G>A	9271G>A	V3091I	missense	rs80359194	VUS	VUS	VUS	VUS	PS3 | PM2 | BP1 | BP4	likely HRD proficient
BRCA2	32968844A>G	9275A>G	Y3092C	missense	rs80359195	Benign	LIKELY BENIGN	BENIGN	BENIGN	BS1 | BS3| BP1| PP3	neutral
BRCA2	32968855G>A	9286G>A	E3096K	missense	rs80359199	VUS	VUS	VUS	VUS	PP3 | BP1
BRCA2	32968951C>T	9382C>T	R3128*	stop gained	rs80359212	Pathogenic	PATHOGENIC	PATHOGENIC	PATHOGENIC	PVS1 | PS1 | PP5 | BS1	HRD deficient (high)
BRCA2	32968954C>G	9385C>G	P3129A	missense	rs80359213	VUS		VUS	VUS	PM2 |BP1
BRCA2	32968961C>A	9392C>A	S3131Y	missense	.	VUS		VUS	VUS	PM2 |BP1
BRCA2	32968970G>A	9401G>A	G3134D	missense	.	VUS	VUS	VUS	VUS	PM2 |BP1
BRCA2	32969018C>T	9449C>T	P3150L	missense	rs80359217	VUS	VUS	VUS	VUS	PM2 | PP3 | BP1
BRCA2	32969019AAAAGAG>A	9451_9456delAAAGAG	K3151_E3152del	cds indel	.	VUS		VUS	VUS	PM2 | PM4
BRCA2	32971086C>G	9553C>G	H3185D	missense	.	VUS		LIKELY BENIGN	LIKELY BENIGN	BP1 | BP4 | PM2
BRCA2	32971112C>T	9579C>T	T3193=	synonymous codon	.	VUS		VUS	VUS	PM2
BRCA2	32971138C>T	9605C>T	P3202L	missense	rs397507432	VUS	VUS	LIKELY BENIGN	LIKELY BENIGN	BP1 | BP4 | PM2
BRCA2	32971139G>A	9606G>A	P3202=	synonymous codon	rs755890067	Benign	LIKELY BENIGN	LIKELY BENIGN	LIKELY BENIGN	BS1
BRCA2	32971161G>A	9628G>A	G3210S	missense	.	Benign	VUS	LIKELY BENIGN	LIKELY BENIGN	BP1 | BP4 | PM2
BRCA2	32971171A>G	9638A>G	N3213S	missense	.	VUS		LIKELY BENIGN	LIKELY BENIGN	BP1 | BP4 | PM2
BRCA2	32971182G>T	9648+1G>T		splice donor variant	.	Pathogenic		PATHOGENIC	PATHOGENIC	PVS1 | PM2 | PP3	HRD deficient (high)
BRCA2	32972333G>C	9683G>C	S3228T	missense	.	VUS		LIKELY BENIGN	LIKELY BENIGN	BP1 | BP4 | PM2
BRCA2	32972356A>G	9706A>G	K3236E	missense	rs80359239	VUS		LIKELY BENIGN	LIKELY BENIGN	BP1 | BP4 | PM2
BRCA2	32972383T>G	9733T>G	S3245A	missense	.	VUS	VUS	LIKELY BENIGN	LIKELY BENIGN	BP1 | BP4 | PM2
BRCA2	32972415G>C	9765G>C	G3255=	synonymous codon	.	VUS		VUS	VUS	PM2
BRCA2	32972435A>G	9785A>G	Q3262R	missense	.	VUS		LIKELY BENIGN	LIKELY BENIGN	BP1 | BP4 | PM2
BRCA2	32972525C>T	9875C>T	P3292L	missense	rs56121817	VUS	VUS	BENIGN	BENIGN	BS1| BS3| BP1	neutral
BRCA2	32972526G>A	9876G>A	P3292=	synonymous codon	rs369047997	Benign	LIKELY BENIGN	LIKELY BENIGN	LIKELY BENIGN	BS1
BRCA2	32972535G>A	9885G>A	Q3295=	synonymous codon	.	VUS	LIKELY BENIGN	LIKELY BENIGN	VUS	BS1
BRCA2	32972548C>T	9898C>T	P3300S	missense	rs770868371	VUS	VUS	VUS	VUS	PP3 | BP1
BRCA2	32972639AAAT>A	9990_9992delAAT	E3330_I3331delinsD	cds indel	.	VUS		VUS	VUS	PM2 | PM4
BRCA2	32972644T>C	9994T>C	S3332P	missense	.	VUS		VUS	VUS	PM2 |BP1
BRCA2	32972645C>A	9995C>A	S3332Y	missense	.	VUS	VUS	VUS	VUS	PM2 |BP1
BRCA2	32972699A>C	10049A>C	Q3350P	missense	.	VUS		VUS	VUS	PM2 | PP3 | BP1
BRCA2	32972728A>G	10078A>G	K3360E	missense	.	VUS		VUS	VUS	PM2 |BP1
BRCA2	32972733A>G	10083A>G	Q3361=	synonymous codon	.	VUS		VUS	VUS	PM2
BRCA2	32972756C>G	10106C>G	T3369S	missense	.	VUS		LIKELY BENIGN	LIKELY BENIGN	BP1 | BP4 | PM2
BRCA2	32972763T>C	10113T>C	T3371=	synonymous codon	rs779075029	VUS	LIKELY BENIGN	LIKELY BENIGN	LIKELY BENIGN	BS1
BRCA2	32972781A>C	10131A>C	E3377D	missense	.	VUS	VUS	LIKELY BENIGN	LIKELY BENIGN	BP1 | BP4 | PM2
BRCA2	32972791A>C	10141A>C	R3381=	synonymous codon	.	VUS		VUS	VUS	PM2
BRCA2	32972800C>T	10150C>T	R3384*	stop gained	rs397507568	VUS	VUS	LIKELY BENIGN	LIKELY BENIGN	BS1
BRCA2	32972823C>A	10173C>A	I3391=	synonymous codon	.	VUS		VUS	VUS	PM2
BRCA2	32972844G>C	10194G>C	Q3398H	missense	.	VUS		LIKELY BENIGN	LIKELY BENIGN	BP1 | BP4 | PM2
BRCA2	32972853G>A	10203G>A	T3401=	synonymous codon	rs147854265	Benign	LIKELY BENIGN	LIKELY BENIGN	LIKELY BENIGN	BS1
BRCA2	32972867AAAAT>A	10220_10223delATAA	N3407fs	frameshift variant	.	Pathogenic		VUS	VUS	PM2
BRCA2	32972884A>G	10234A>G	I3412V	missense	rs1801426	Benign	BENIGN	BENIGN	BENIGN	BA1 | BS3 | BP1 | BP4 | BP6	neutral
BRCA1	41197729T>C	5558A>G	Y1853C	missense	rs80357258	Pathogenic	LIKELY PATHOGENIC	LIKELY PATHOGENIC	LIKELY PATHOGENIC	PS3 | PM1 | PM2 | PP3	HRD deficient (high)
BRCA1	41197742C>T	5545G>A	E1849K	missense	.	VUS		VUS	VUS	BS3 | PM1 | PM2	neutral
BRCA1	41197760C>G	5527G>C	A1843P	missense	rs80357019	VUS	LIKELY PATHOGENIC	LIKELY PATHOGENIC	LIKELY PATHOGENIC	PS3 | PM1 | PM2	HRD deficient (high)
BRCA1	41197775C>A	5512G>T	V1838L	missense	rs730881501	Pathogenic	VUS	LIKELY PATHOGENIC	LIKELY PATHOGENIC	PM1 | PM2 | PM5 | BS3	neutral
BRCA1	41197780T>C	5507A>G	E1836G	missense	.	VUS		VUS	VUS	BS3 | PM1 | PM2 | PP3	neutral
BRCA1	41197784G>A	5503C>T	R1835*	stop gained	rs41293465	Pathogenic	PATHOGENIC	PATHOGENIC	PATHOGENIC	PVS1 | PS1 | PM2 | PP5	HRD deficient (high)
BRCA1	41197800C>T	5487G>A	E1829=	synonymous codon	.	VUS		VUS	VUS	BS3 | PM2	neutral
BRCA1	41199659C>T	5467+1G>A		splice donor variant	rs80358145	Pathogenic	LIKELY PATHOGENIC	PATHOGENIC	PATHOGENIC	PVS1 | PS3 | PM2 | PP3 | PP5	HRD deficient (high)
BRCA1	41199684A>G	5443T>C	W1815R	missense	.	VUS		VUS	VUS	BS3 | PM1 | PM2 | PP3	neutral
BRCA1	41201153T>A	5391A>T	S1797=	synonymous codon	.	VUS		VUS	VUS	BS3 | PM2	neutral
BRCA1	41201179C>T	5365G>A	A1789T	missense	rs80357078	Pathogenic	VUS	LIKELY PATHOGENIC	LIKELY PATHOGENIC	PS3 | PM1	likely HRD proficient
BRCA1	41201211T>C	5333A>G	D1778G	missense	rs80357041	VUS	LIKELY BENIGN	VUS	VUS	BS3 | PM1 | PM2	neutral
BRCA1	41203085G>A	5327C>T	P1776L	missense	rs398122695	VUS	VUS	VUS	VUS	BS3 | PM1 | PM2	neutral
BRCA1	41203094G>A	5318C>T	T1773I	missense	rs80357428	VUS	VUS	LIKELY PATHOGENIC	LIKELY PATHOGENIC	PS3 | PM1 | PM2	likely HRD proficient
BRCA1	41203097A>C	5315T>G	F1772C	missense	.	VUS	VUS	VUS	VUS	BS3 | PM1 | PM2	neutral
BRCA1	41203102C>T	5310G>A	G1770=	synonymous codon	rs273901761	Benign	LIKELY BENIGN	BENIGN	BENIGN	BS1 | BS3	neutral
BRCA1	41203106T>C	5306A>G	Y1769C	missense	rs397509257	VUS	VUS	LIKELY BENIGN	LIKELY BENIGN	BS1| BP4 | PM1
BRCA1	41203109C>A	5303G>T	C1768F	missense	.	VUS		LIKELY PATHOGENIC	LIKELY PATHOGENIC	PS3 | PM1 | PM2	HRD deficient (high)
BRCA1	41203124C>T	5288G>A	G1763E	missense	.	VUS		VUS	VUS	PM1 | PM2
BRCA1	41203135C>G	5278-1G>C		splice acceptor variant	rs80358099	Pathogenic	PATHOGENIC	PATHOGENIC	PATHOGENIC	PVS1 | PS3 | PM2 | PP3 | PP5	HRD deficient (high)
BRCA1	41209091G>C	5255C>G	A1752G	missense	.	VUS	VUS	VUS	VUS	BS3 | PM2	neutral
BRCA1	41209095G>A	5251C>T	R1751*	stop gained	rs80357123	Pathogenic	PATHOGENIC	PATHOGENIC	PATHOGENIC	PVS1 | PS1 | PM2 | PP5	HRD deficient (high)
BRCA1	41209101G>C	5245C>G	P1749A	missense	rs397509244	VUS		VUS	VUS	BS3	neutral
BRCA1	41209133CCT>C	5211_5212delAG	G1738fs	frameshift variant	.	Pathogenic	PATHOGENIC	PATHOGENIC	PATHOGENIC	PVS1 | PM2 | PP5	HRD deficient (high)
BRCA1	41215349C>T	5193+1G>A		splice donor variant	rs80358004	Pathogenic	PATHOGENIC	PATHOGENIC	PATHOGENIC	PVS1 | PS3 | PM2 | PP3 | PP5	HRD deficient (high)
BRCA1	41215366C>T	5177G>A	R1726K	missense	.	VUS		LIKELY BENIGN	LIKELY BENIGN	BS3 | BP4 | PM2	neutral
BRCA1	41215382G>A	5161C>T	Q1721*	stop gained	.	Pathogenic	PATHOGENIC	PATHOGENIC	PATHOGENIC	PVS1 | PS1 | PM2 | PP5	HRD deficient (high)
BRCA1	41215389C>A	5154G>T	W1718C	missense	rs80357239	VUS	LIKELY PATHOGENIC	LIKELY PATHOGENIC	LIKELY PATHOGENIC	PS3 | PM2 | PP3	HRD deficient (high)
BRCA1	41215915C>T	5128G>A	G1710R	missense	rs397509229	VUS		BENIGN	BENIGN	BS1 | BS3	neutral
BRCA1	41215920G>T	5123C>A	A1708E	missense	rs28897696	Pathogenic	PATHOGENIC	PATHOGENIC	PATHOGENIC	PS1 | PS3 | PP5	HRD deficient (high)
BRCA1	41215947C>T	5096G>A	R1699Q	missense	rs41293459	Pathogenic	VUS	LIKELY PATHOGENIC	LIKELY PATHOGENIC	PS3 | PM5	HRD deficient (high)
BRCA1	41215948G>A	5095C>T	R1699W	missense	rs55770810	Pathogenic	PATHOGENIC	PATHOGENIC	PATHOGENIC	PS1 | PS3 | PP3 | PP5 | BS1	HRD deficient (high)
BRCA1	41215953C>A	5090G>T	C1697F	missense	.	VUS		LIKELY PATHOGENIC	LIKELY PATHOGENIC	PS3 | PM2	HRD deficient (high)
BRCA1	41215969C>G	5075-1G>C		splice acceptor variant	rs1800747	Pathogenic	PATHOGENIC	PATHOGENIC	PATHOGENIC	PVS1 | PS3 | PM2 | PP3 | PP5	HRD deficient (high)
BRCA1	41219631T>G	5068A>C	K1690Q	missense	rs397507239	VUS	VUS	BENIGN	BENIGN	BS1 | BS3	neutral
BRCA1	41219633A>G	5066T>C	M1689T	missense	rs80357061	Pathogenic	VUS	LIKELY PATHOGENIC	LIKELY PATHOGENIC	PS3 | PM2	likely HRD proficient
BRCA1	41219665ATTAG>A	5030_5033delCTAA	T1677fs	frameshift variant	rs80357580	Pathogenic	PATHOGENIC	PATHOGENIC	PATHOGENIC	PVS1 | PS1 | PM2 | PP5	HRD deficient (high)
BRCA1	41219701G>A	4998C>T	Y1666=	synonymous codon	rs730882165	Benign	LIKELY BENIGN	VUS	LIKELY BENIGN	PM2
BRCA1	41219707G>A	4992C>T	L1664=	synonymous codon	rs142459158	Benign	BENIGN	LIKELY BENIGN	BENIGN	BS1 | BP6
BRCA1	41222946A>G	4985T>C	F1662S	missense	rs28897695	Benign	BENIGN	BENIGN	BENIGN	BS1 | BS3 | BP4 | BP6	neutral
BRCA1	41222967G>A	4964C>T	S1655F	missense	rs80357390	Pathogenic	LIKELY PATHOGENIC	LIKELY PATHOGENIC	LIKELY PATHOGENIC	PS3 | PM2	HRD deficient (high)
BRCA1	41222974C>A	4957G>T	V1653L	missense	.	VUS		LIKELY PATHOGENIC	LIKELY PATHOGENIC	PS3 | PM2	HRD deficient (high)
BRCA1	41222975C>T	4956G>A	M1652I	missense	rs1799967	Benign	BENIGN	BENIGN	BENIGN	BA1 | BS3 | BP4 | BP6	neutral
BRCA1	41222980A>G	4951T>C	S1651P	missense	.	VUS	VUS	LIKELY PATHOGENIC	LIKELY PATHOGENIC	PS3 | PM2	likely HRD proficient
BRCA1	41222989T>C	4942A>G	K1648E	missense	rs747694453	VUS		VUS	VUS	BS3	neutral
BRCA1	41222996C>G	4935G>C	R1645S	missense	rs80357373	VUS	VUS	VUS	VUS	BS3 | PM2	neutral
BRCA1	41223035C>T	4896G>A	V1632=	synonymous codon	.	VUS		VUS	VUS	BS3 | PM2	neutral
BRCA1	41223048A>G	4883T>C	M1628T	missense	rs4986854	Benign	BENIGN	BENIGN	BENIGN	BA1 | BS3 | BP4 | BP6	neutral
BRCA1	41223076T>C	4855A>G	T1619A	missense	.	VUS		VUS	VUS	BP4 | PM2
BRCA1	41223094T>C	4837A>G	S1613G	missense	rs1799966	Benign	BENIGN	BENIGN	BENIGN	BA1 | BS3 | BP6	neutral
BRCA1	41223118A>G	4813T>C	L1605=	synonymous codon	rs80356833	Benign	LIKELY BENIGN	LIKELY BENIGN	LIKELY BENIGN	BS1
BRCA1	41223119T>C	4812A>G	Q1604=	synonymous codon	rs28897693	Benign	BENIGN	BENIGN	BENIGN	BS1 | BS3 | BP6	neutral
BRCA1	41223133A>G	4798T>C	L1600=	synonymous codon	rs775837744	Benign	LIKELY BENIGN	VUS	LIKELY BENIGN	-
BRCA1	41223165C>T	4766G>A	R1589H	missense	rs80357341	VUS	VUS	LIKELY BENIGN	LIKELY BENIGN	BS3 | BP4	neutral
BRCA1	41223171G>A	4760C>T	S1587L	missense	.	VUS		VUS	VUS	BP4 | PM2
BRCA1	41223179G>A	4752C>T	A1584=	synonymous codon	rs786201422	Benign	LIKELY BENIGN	VUS	LIKELY BENIGN	PM2
BRCA1	41223183C>G	4748G>C	R1583T	missense	.	VUS		VUS	VUS	PM2
BRCA1	41223202A>G	4729T>C	S1577P	missense	rs80356909	Benign	VUS	BENIGN	BENIGN	BS1 | BS3 | BP4	neutral
BRCA1	41223214C>T	4717G>A	D1573N	missense	.	VUS		VUS	VUS	BP4 | PM2
BRCA1	41226379C>T	4644G>A	T1548=	synonymous codon	rs28897692	Benign	LIKELY BENIGN	LIKELY BENIGN	LIKELY BENIGN	BS1
BRCA1	41226411G>A	4612C>T	Q1538*	stop gained	rs80356992	Pathogenic	PATHOGENIC	PATHOGENIC	PATHOGENIC	PVS1 | PS1 | PM2 | PP5	HRD deficient (high)
BRCA1	41226540T>C	4485-2A>G		splice acceptor variant	rs80358054	Pathogenic	PATHOGENIC	PATHOGENIC	PATHOGENIC	PVS1 | PM2 | PP3 | PP5	HRD deficient (high)
BRCA1	41228515CTGGT>C	4470_4473delACCA	P1491fs	frameshift variant	.	Pathogenic		LIKELY PATHOGENIC	LIKELY PATHOGENIC	PVS1 | PM2	HRD deficient (high)
BRCA1	41228533T>C	4456A>G	S1486G	missense	.	VUS		VUS	VUS	PM2
BRCA1	41228542T>G	4447A>C	S1483R	missense	.	VUS	VUS	VUS	VUS	BP4 | PM2
BRCA1	41228566C>A	4423G>T	D1475Y	missense	.	VUS	VUS	VUS	VUS	PM2
BRCA1	41228567A>G	4422T>C	A1474=	synonymous codon	rs756281673	Benign	LIKELY BENIGN	LIKELY BENIGN	LIKELY BENIGN	BS1
BRCA1	41228613T>C	4376A>G	K1459R	missense	.	VUS	VUS	VUS	VUS	BP4 | PM2
BRCA1	41231356A>G	4358-2725T>C		intron variant	rs374519494	VUS	VUS	LIKELY BENIGN	LIKELY BENIGN	BS1
BRCA1	41231371C>G	4358-2740G>C		intron variant	.	VUS		VUS	VUS	PM2
BRCA1	41231372T>A	4358-2741A>T		intron variant	.	VUS		VUS	VUS	PM2
BRCA1	41231398T>C	4358-2767A>G		intron variant	.	VUS		VUS	VUS	PM2 |BP1
BRCA1	41234431T>C	4347A>G	T1449=	synonymous codon	rs80356840	Benign	LIKELY BENIGN	LIKELY BENIGN	LIKELY BENIGN	BS1
BRCA1	41234439G>GTTCT	4335_4338dupAGAA	Q1447fs	frameshift variant	rs397509164	Pathogenic	PATHOGENIC	PATHOGENIC	PATHOGENIC	PVS1 | PS1 | PM2 | PP5	HRD deficient (high)
BRCA1	41234465G>A	4313C>T	A1438V	missense	.	VUS		VUS	VUS	PM2
BRCA1	41234470A>G	4308T>C	S1436=	synonymous codon	rs1060915	Benign	BENIGN	BENIGN	BENIGN	BA1 | BP6	neutral
BRCA1	41234472A>G	4306T>C	S1436P	missense	.	VUS		VUS	VUS	BP4 | PM2
BRCA1	41234489G>A	4289C>T	P1430L	missense	.	VUS		VUS	VUS	PM2
BRCA1	41234510C>T	4268G>A	S1423N	missense	.	VUS		VUS	VUS	BP4 | PM2
BRCA1	41234523C>A	4255G>T	E1419*	stop gained	.	Pathogenic	PATHOGENIC	PATHOGENIC	PATHOGENIC	PVS1 | PS1 | PM2 | PP5	HRD deficient (high)
BRCA1	41234568G>C	4210C>G	L1404V	missense	.	VUS		VUS	VUS	PM2
BRCA1	41234580T>C	4198A>G	M1400V	missense	rs80357306	VUS		LIKELY PATHOGENIC	LIKELY PATHOGENIC	PS3 | PM2	likely HRD proficient
BRCA1	41242960C>T	4185+1G>A		splice donor variant	rs80358076	Pathogenic	PATHOGENIC	PATHOGENIC	PATHOGENIC	PVS1 | PS3 | PM2 | PP3 | PP5	HRD deficient (high)
BRCA1	41242961C>T	4185G>A	Q1395=	synonymous codon	rs80356857	Pathogenic	PATHOGENIC	LIKELY PATHOGENIC	LIKELY PATHOGENIC	PS3 | PM2 | PP3 | PP5	HRD deficient (high)
BRCA1	41242983TGA>T	4161_4162delTC	Q1388fs	frameshift variant	rs80357565	Pathogenic	PATHOGENIC	PATHOGENIC	PATHOGENIC	PVS1 | PS1 | PM2 | PP5	HRD deficient (high)
BRCA1	41242987A>G	4159T>C	S1387P	missense	.	VUS	VUS	VUS	VUS	PM2
BRCA1	41242988G>A	4158C>T	S1386=	synonymous codon	.	VUS		VUS	VUS	PM2
BRCA1	41242991T>C	4155A>G	L1385=	synonymous codon	.	VUS	LIKELY BENIGN	VUS	VUS	PM2
BRCA1	41243008CAG>C	4136_4137delCT	S1379*	stop gained	rs397509141	Pathogenic	PATHOGENIC	PATHOGENIC	PATHOGENIC	PVS1 | PS1 | PM2 | PP5	HRD deficient (high)
BRCA1	41243012G>A	4134C>T	V1378=	synonymous codon	.	VUS		VUS	VUS	PM2
BRCA1	41243015G>A	4131C>T	S1377=	synonymous codon	rs80356871	Benign	LIKELY BENIGN	VUS	LIKELY BENIGN	-
BRCA1	41243024ACT>A	4120_4121delAG	S1374*	stop gained	rs80357787	Pathogenic	PATHOGENIC	PATHOGENIC	PATHOGENIC	PVS1 | PS1 | PM2 | PP5	HRD deficient (high)
BRCA1	41243040G>T	4106C>A	A1369E	missense	.	VUS		VUS	VUS	PM2
BRCA1	41243044C>T	4102G>A	A1368T	missense	.	VUS	VUS	VUS	VUS	BP4 | PM2
BRCA1	41243454A>G	4094T>C	L1365S	missense	.	VUS		VUS	VUS	BP4 | PM2
BRCA1	41243495C>T	4053G>A	L1351=	synonymous codon	.	VUS		VUS	VUS	PM2
BRCA1	41243501C>T	4047G>A	T1349=	synonymous codon	rs758515222	Benign	LIKELY BENIGN	VUS	LIKELY BENIGN	-
BRCA1	41243502G>A	4046C>T	T1349M	missense	rs80357345	Benign	BENIGN	BENIGN	BENIGN	BS1 | BS3 | BP6	neutral
BRCA1	41243505CCT>C	4041_4042delAG	G1348fs	frameshift variant	rs80357727	Pathogenic	PATHOGENIC	PATHOGENIC	PATHOGENIC	PVS1 | PS1 | PM2 | PP5	HRD deficient (high)
BRCA1	41243573C>T	3975G>A	R1325=	synonymous codon	rs761424661	VUS	LIKELY BENIGN	VUS	LIKELY BENIGN	-
BRCA1	41243605G>A	3943C>T	P1315S	missense	.	VUS		VUS	VUS	BP4 | PM2
BRCA1	41243663C>T	3885G>A	L1295=	synonymous codon	.	VUS	LIKELY BENIGN	VUS	VUS	PM2
BRCA1	41243696G>A	3852C>T	H1284=	synonymous codon	rs776070899	VUS	LIKELY BENIGN	VUS	LIKELY BENIGN	-
BRCA1	41243737T>G	3811A>C	S1271R	missense	.	VUS		VUS	VUS	PM2
BRCA1	41243776C>T	3772G>A	E1258K	missense	.	VUS	VUS	LIKELY BENIGN	LIKELY BENIGN	BS1 | BP4
BRCA1	41243800C>T	3748G>A	E1250K	missense	rs28897686	Benign	BENIGN	BENIGN	BENIGN	BS1 | BS3 | BP6	neutral
BRCA1	41243801G>A	3747C>T	T1249=	synonymous codon	rs587780801	Benign	LIKELY BENIGN	LIKELY BENIGN	LIKELY BENIGN	BS1
BRCA1	41243841T>C	3707A>G	N1236S	missense	rs863224760	VUS	VUS	VUS	VUS	BP4 | PM2
BRCA1	41243846T>A	3702A>T	V1234=	synonymous codon	.	VUS		VUS	VUS	PM2
BRCA1	41243849T>C	3699A>G	K1233=	synonymous codon	rs368690455	Benign	LIKELY BENIGN	LIKELY BENIGN	LIKELY BENIGN	BS1
BRCA1	41243886T>G	3662A>C	E1221A	missense	rs273900713	VUS	VUS	LIKELY BENIGN	LIKELY BENIGN	BS1
BRCA1	41243899A>G	3649T>C	S1217P	missense	rs273900712	VUS	VUS	LIKELY BENIGN	LIKELY BENIGN	BS1
BRCA1	41243908C>A	3640G>T	E1214*	stop gained	rs80356923	Pathogenic	PATHOGENIC	PATHOGENIC	PATHOGENIC	PVS1 | PS1 | PM2 | PP5	HRD deficient (high)
BRCA1	41243921T>A	3627A>T	L1209F	missense	.	VUS		VUS	VUS	PM2
BRCA1	41243929T>G	3619A>C	K1207Q	missense	.	VUS		VUS	VUS	BP4 | PM2
BRCA1	41243934C>T	3614G>A	G1205E	missense	.	VUS		VUS	VUS	BP4 | PM2
BRCA1	41243967G>GTGAA	3577_3580dupTTCA	T1194fs	frameshift variant	.	Pathogenic		LIKELY PATHOGENIC	LIKELY PATHOGENIC	PVS1 | PM2	HRD deficient (high)
BRCA1	41243980G>A	3568C>T	P1190S	missense	.	VUS		VUS	VUS	PM2
BRCA1	41243988C>T	3560G>A	S1187N	missense	rs80356975	VUS	VUS	VUS	VUS	BP4
BRCA1	41244000T>C	3548A>G	K1183R	missense	rs16942	Benign	BENIGN	BENIGN	BENIGN	BA1 | BS3 | BP4 | BP6	neutral
BRCA1	41244004G>A	3544C>T	Q1182*	stop gained	rs80357296	Pathogenic	PATHOGENIC	PATHOGENIC	PATHOGENIC	PVS1 | PS1 | PM2 | PP5	HRD deficient (high)
BRCA1	41244007C>T	3541G>A	V1181I	missense	rs56336919	VUS	VUS	LIKELY BENIGN	LIKELY BENIGN	BS1 | BP4
BRCA1	41244069TTTA>T	3476_3478delTAA	I1159del	cds indel	.	VUS		VUS	VUS	PM2 | PM4
BRCA1	41244082C>T	3466G>A	D1156N	missense	.	VUS	VUS	VUS	VUS	PM2
BRCA1	41244096T>A	3452A>T	D1151V	missense	.	VUS		VUS	VUS	PM2 | PP3
BRCA1	41244099G>C	3449C>G	P1150R	missense	.	VUS		VUS	VUS	PM2 | PP3
BRCA1	41244100G>A	3448C>T	P1150S	missense	rs80357272	VUS	VUS	BENIGN	BENIGN	BS1 | BS3 | PP3	neutral
BRCA1	41244105TC>T	3442delG	E1148fs	frameshift variant	rs80357808	Pathogenic	PATHOGENIC	PATHOGENIC	PATHOGENIC	PVS1 | PS1 | PM2 | PP5	HRD deficient (high)
BRCA1	41244113A>G	3435T>C	V1145=	synonymous codon	rs786201222	Benign	LIKELY BENIGN	VUS	VUS	PM2
BRCA1	41244129C>A	3419G>T	S1140I	missense	.	VUS		VUS	VUS	PM2
BRCA1	41244200T>C	3348A>G	V1116=	synonymous codon	.	Benign	LIKELY BENIGN	VUS	LIKELY BENIGN	PM2
BRCA1	41244218CT>C	3329delA	K1110fs	frameshift variant	rs397509056	Pathogenic	PATHOGENIC	PATHOGENIC	PATHOGENIC	PVS1 | PS1 | PM2 | PP5	HRD deficient (high)
BRCA1	41244250C>T	3298G>A	G1100R	missense	.	VUS	VUS	VUS	VUS	BP4 | PM2
BRCA1	41244258CTT>C	3288_3289delAA	L1098fs	frameshift variant	rs80357686	Pathogenic	PATHOGENIC	PATHOGENIC	PATHOGENIC	PVS1 | PS1 | PM2 | PP5	HRD deficient (high)
BRCA1	41244265T>C	3283A>G	K1095E	missense	.	Pathogenic		VUS	VUS	BP4 | PM2
BRCA1	41244270A>T	3278T>A	V1093D	missense	.	VUS		VUS	VUS	PM2
BRCA1	41244331C>T	3217G>A	G1073S	missense	.	VUS	VUS	VUS	VUS	BP4 | PM2
BRCA1	41244333A>G	3215T>C	L1072P	missense	.	VUS		VUS	VUS	BP4 | PM2
BRCA1	41244339G>T	3209C>A	A1070E	missense	.	VUS		VUS	VUS	PM2
BRCA1	41244342T>C	3206A>G	Q1069R	missense	.	VUS		VUS	VUS	BP4 | PM2
BRCA1	41244405C>T	3143G>A	G1048D	missense	rs80356899	VUS	VUS	LIKELY BENIGN	LIKELY BENIGN	BS1
BRCA1	41244429C>T	3119G>A	S1040N	missense	rs4986852	Benign	BENIGN	BENIGN	BENIGN	BA1 | BS3 | BP6	neutral
BRCA1	41244435T>C	3113A>G	E1038G	missense	rs16941	Benign	BENIGN	BENIGN	BENIGN	BA1 | BS3 | BP6	neutral
BRCA1	41244465C>T	3083G>A	R1028H	missense	rs80357459	Benign	BENIGN	BENIGN	BENIGN	BS1 | BS3 | BP4 | BP6	neutral
BRCA1	41244495T>C	3053A>G	N1018S	missense	.	VUS		VUS	VUS	BP4 | PM2
BRCA1	41244519G>A	3029C>T	P1010L	missense	.	VUS		VUS	VUS	BP4 | PM2
BRCA1	41244526T>C	3022A>G	M1008V	missense	rs56321129	VUS	BENIGN	LIKELY BENIGN	BENIGN	BS3 | BP4 | BP6	neutral
BRCA1	41244569T>C	2979A>G	K993=	synonymous codon	rs772854836	Benign	LIKELY BENIGN	LIKELY BENIGN	LIKELY BENIGN	BS1
BRCA1	41244584T>C	2964A>G	S988=	synonymous codon	.	Benign	VUS	VUS	VUS	PM2
BRCA1	41244596A>G	2952T>C	F984=	synonymous codon	.	VUS		VUS	VUS	PM2
BRCA1	41244612C>T	2936G>A	R979H	missense	rs80356985	VUS	VUS	VUS	VUS	BP4
BRCA1	41244617T>C	2931A>G	P977=	synonymous codon	rs273899691	VUS	LIKELY BENIGN	LIKELY BENIGN	LIKELY BENIGN	BS1
BRCA1	41244643T>C	2905A>G	N969D	missense	rs587781641	VUS	VUS	VUS	VUS	BP4 | PM2
BRCA1	41244665G>A	2883C>T	N961=	synonymous codon	rs201190540	Benign	LIKELY BENIGN	VUS	LIKELY BENIGN	-
BRCA1	41244667T>C	2881A>G	N961D	missense	.	VUS		VUS	VUS	BP4 | PM2
BRCA1	41244748G>A	2800C>T	Q934*	stop gained	rs80357223	Pathogenic	PATHOGENIC	PATHOGENIC	PATHOGENIC	PVS1 | PS1 | PM2 | PP5	HRD deficient (high)
BRCA1	41244777TTAAC>T	2767_2770delGTTA	V923fs	frameshift variant	rs80357661	Pathogenic	PATHOGENIC	PATHOGENIC	PATHOGENIC	PVS1 | PS1 | PM2 | PP5	HRD deficient (high)
BRCA1	41244794CT>C	2753delA	K918fs	frameshift variant	.	Pathogenic		LIKELY PATHOGENIC	LIKELY PATHOGENIC	PVS1 | PM2	HRD deficient (high)
BRCA1	41244798AT>A	2749delA	I917fs	frameshift variant	.	Pathogenic		LIKELY PATHOGENIC	LIKELY PATHOGENIC	PVS1 | PM2	HRD deficient (high)
BRCA1	41244820G>C	2728C>G	Q910E	missense	.	VUS	VUS	VUS	VUS	BP4 | PM2
BRCA1	41244822T>A	2726A>T	N909I	missense	rs80357127	VUS	VUS	LIKELY BENIGN	LIKELY BENIGN	BS1
BRCA1	41244849G>A	2699C>T	T900I	missense	.	VUS		VUS	VUS	BP4 | PM2
BRCA1	41244868T>G	2680A>C	K894Q	missense	.	VUS		VUS	VUS	PM2
BRCA1	41244876G>A	2672C>T	S891F	missense	.	VUS		VUS	VUS	BP4 | PM2
BRCA1	41244935C>T	2613G>A	P871=	synonymous codon	rs587782608	Benign	LIKELY BENIGN	LIKELY BENIGN	LIKELY BENIGN	BS1
BRCA1	41244936G>A	2612C>T	P871L	missense	rs799917	Benign	BENIGN	BENIGN	BENIGN	BA1 | BS3 | BP4 | BP6	neutral
BRCA1	41244973T>C	2575A>G	N859D	missense	.	VUS	VUS	VUS	VUS	PM2
BRCA1	41244982A>G	2566T>C	Y856H	missense	rs80356892	Benign	BENIGN	BENIGN	BENIGN	BA1 | BP6	neutral
BRCA1	41244984T>G	2564A>C	Q855P	missense	rs768001441	VUS	VUS	VUS	VUS	PM2 | PP3
BRCA1	41245004T>C	2544A>G	E848=	synonymous codon	.	VUS		VUS	VUS	PM2
BRCA1	41245021T>C	2527A>G	T843A	missense	rs80357435	VUS	VUS	VUS	VUS	BP4 | PM2
BRCA1	41245034GT>G	2513delA	N838fs	frameshift variant	rs80357863	Pathogenic	PATHOGENIC	PATHOGENIC	PATHOGENIC	PVS1 | PS1 | PM2 | PP5	HRD deficient (high)
BRCA1	41245055A>G	2493T>C	Y831=	synonymous codon	.	VUS		VUS	VUS	PM2
BRCA1	41245067T>G	2481A>C	E827D	missense	rs397508970	VUS	VUS	VUS	VUS	-
BRCA1	41245108G>T	2440C>A	L814I	missense	.	VUS		VUS	VUS	PM2
BRCA1	41245157TTC>T	2389_2390delGA	E797fs	frameshift variant	rs80357695	Pathogenic	PATHOGENIC	PATHOGENIC	PATHOGENIC	PVS1 | PS1 | PM2 | PP5	HRD deficient (high)
BRCA1	41245201T>C	2347A>G	I783V	missense	rs80356948	Benign	VUS	LIKELY BENIGN	LIKELY BENIGN	BS1 | BP4
BRCA1	41245203C>A	2345G>T	S782I	missense	.	VUS	VUS	VUS	VUS	PM2 | PP3
BRCA1	41245207C>G	2341G>C	E781Q	missense	.	VUS		VUS	VUS	PM2
BRCA1	41245224G>C	2324C>G	T775S	missense	.	VUS		VUS	VUS	PM2 | PP3
BRCA1	41245228C>T	2320G>A	G774S	missense	.	VUS		VUS	VUS	BP4 | PM2
BRCA1	41245236A>G	2312T>C	L771S	missense	rs730881481	VUS	VUS	VUS	VUS	PM2 | PP3
BRCA1	41245237A>G	2311T>C	L771=	synonymous codon	rs16940	Benign	BENIGN	BENIGN	BENIGN	BA1 | BS3 | BP6	neutral
BRCA1	41245238T>C	2310A>G	S770=	synonymous codon	.	VUS		VUS	VUS	PM2
BRCA1	41245247GC>G	2300delG	S767fs	frameshift variant	.	Pathogenic		LIKELY PATHOGENIC	LIKELY PATHOGENIC	PVS1 | PM2	HRD deficient (high)
BRCA1	41245262T>A	2286A>T	R762S	missense	rs273898682	VUS	VUS	BENIGN	BENIGN	BS1 | BS3	neutral
BRCA1	41245272T>A	2276A>T	Q759L	missense	.	VUS		VUS	VUS	PM2
BRCA1	41245280C>T	2268G>A	R756=	synonymous codon	.	VUS		VUS	VUS	PM2
BRCA1	41245290C>T	2258G>A	S753N	missense	.	VUS	VUS	VUS	VUS	BP4 | PM2
BRCA1	41245307G>T	2241C>A	P747=	synonymous codon	.	VUS		VUS	VUS	PM2
BRCA1	41245310G>A	2238C>T	D746=	synonymous codon	.	VUS		VUS	VUS	PM2
BRCA1	41245330C>CT	2217dupA	V740fs	frameshift variant	rs80357802	Pathogenic	PATHOGENIC	PATHOGENIC	PATHOGENIC	PVS1 | PS1 | PM2 | PP5	HRD deficient (high)
BRCA1	41245343T>C	2205A>G	L735=	synonymous codon	.	VUS	LIKELY BENIGN	VUS	VUS	PM2
BRCA1	41245351CTTCTT>C	2192_2196delAAGAA	K731fs	frameshift variant	rs397508946	Pathogenic	PATHOGENIC	PATHOGENIC	PATHOGENIC	PVS1 | PS1 | PM2 | PP5	HRD deficient (high)
BRCA1	41245390C>A	2158G>T	E720*	stop gained	rs80356875	Pathogenic	PATHOGENIC	PATHOGENIC	PATHOGENIC	PVS1 | PS1 | PM2 | PP5	HRD deficient (high)
BRCA1	41245409T>C	2139A>G	S713=	synonymous codon	.	VUS		VUS	VUS	PM2
BRCA1	41245466G>A	2082C>T	S694=	synonymous codon	rs1799949	Benign	BENIGN	BENIGN	BENIGN	BA1 | BS3 | BP6	neutral
BRCA1	41245618A>T	1930T>A	C644S	missense	rs753521391	VUS	VUS	VUS	VUS	BP4
BRCA1	41245640A>G	1908T>C	C636=	synonymous codon	.	VUS		VUS	VUS	PM2
BRCA1	41245662C>T	1886G>A	R629K	missense	.	VUS		VUS	VUS	BP4 | PM2
BRCA1	41245669C>T	1879G>A	V627I	missense	rs80357425	VUS	VUS	VUS	VUS	-
BRCA1	41245683G>A	1865C>T	A622V	missense	rs56039126	VUS	BENIGN	LIKELY BENIGN	BENIGN	BS3 | BP4 | BP6	neutral
BRCA1	41245716A>C	1832T>G	L611R	missense	.	VUS		VUS	VUS	PM2 | PP3
BRCA1	41245759C>T	1789G>A	E597K	missense	rs55650082	VUS	BENIGN	BENIGN	BENIGN	BS1 | BS3 | BP6	neutral
BRCA1	41245764T>C	1784A>G	E595G	missense	.	VUS	VUS	VUS	VUS	PM2
BRCA1	41245769A>G	1779T>C	N593=	synonymous codon	.	VUS	LIKELY BENIGN	VUS	VUS	PM2
BRCA1	41245774T>G	1774A>C	S592R	missense	.	VUS		VUS	VUS	PM2 | PP3
BRCA1	41245830G>A	1718C>T	S573L	missense	.	VUS	VUS	VUS	VUS	PM2
BRCA1	41245932G>A	1616C>T	T539M	missense	rs80357374	VUS	VUS	LIKELY BENIGN	LIKELY BENIGN	BS1 | BP4
BRCA1	41245968T>G	1580A>C	K527T	missense	.	VUS		VUS	VUS	PM2 | PP3
BRCA1	41246015G>T	1533C>A	G511=	synonymous codon	.	VUS	LIKELY BENIGN	VUS	VUS	PM2
BRCA1	41246029TC>T	1518delG	R507fs	frameshift variant	rs80357947	Pathogenic	PATHOGENIC	PATHOGENIC	PATHOGENIC	PVS1 | PS1 | PM2 | PP5	HRD deficient (high)
BRCA1	41246031C>T	1517G>A	R506K	missense	.	VUS		VUS	VUS	PM2 | PP3
BRCA1	41246037C>T	1511G>A	R504H	missense	rs56272539	VUS	BENIGN	BENIGN	BENIGN	BS1 | BS3 | BP4 | BP6	neutral
BRCA1	41246064T>G	1484A>C	E495A	missense	.	VUS	VUS	VUS	VUS	PM2
BRCA1	41246081C>T	1467G>A	E489=	synonymous codon	rs794726997	VUS	LIKELY BENIGN	VUS	LIKELY BENIGN	PM2
BRCA1	41246084A>G	1464T>C	T488=	synonymous codon	.	VUS	LIKELY BENIGN	VUS	VUS	PM2
BRCA1	41246156G>A	1392C>T	T464=	synonymous codon	rs533802049	Benign	BENIGN	LIKELY BENIGN	BENIGN	BS1 | BP6
BRCA1	41246181A>G	1367T>C	I456T	missense	rs80357360	VUS	VUS	VUS	VUS	PP3
BRCA1	41246191C>G	1357G>C	E453Q	missense	rs768054411	VUS	VUS	VUS	VUS	PM2 | PP3
BRCA1	41246208A>G	1340T>C	V447A	missense	.	VUS		VUS	VUS	PM2
BRCA1	41246226A>G	1322T>C	I441T	missense	.	VUS		VUS	VUS	BP4 | PM2
BRCA1	41246238T>C	1310A>G	H437R	missense	.	VUS		VUS	VUS	PM2
BRCA1	41246248T>G	1300A>C	S434R	missense	.	VUS		VUS	VUS	PM2
BRCA1	41246255TAAGTCTATTTTCTCTG>T	1277_1292delCAGAGAAAATAGACTT	S426fs	frameshift variant	.	Pathogenic		LIKELY PATHOGENIC	LIKELY PATHOGENIC	PVS1 | PM2	HRD deficient (high)
BRCA1	41246294C>A	1254G>T	E418D	missense	.	VUS		VUS	VUS	PM2
BRCA1	41246305C>T	1243G>A	V415I	missense	rs587782770	VUS	VUS	LIKELY BENIGN	LIKELY BENIGN	BS1
BRCA1	41246317C>G	1231G>C	D411H	missense	.	VUS		VUS	VUS	BP4 | PM2
BRCA1	41246346C>T	1202G>A	G401E	missense	rs397507184	VUS	VUS	VUS	VUS	BP4 | PM2
BRCA1	41246365A>T	1183T>A	S395T	missense	.	VUS		VUS	VUS	PM2
BRCA1	41246413T>A	1135A>T	I379F	missense	.	VUS		VUS	VUS	PM2 | PP3
BRCA1	41246435AG>A	1112delC	P371fs	frameshift variant	rs397508837	Pathogenic	PATHOGENIC	PATHOGENIC	PATHOGENIC	PVS1 | PS1 | PM2 | PP5	HRD deficient (high)
BRCA1	41246440C>A	1108G>T	V370F	missense	.	VUS		VUS	VUS	PM2
BRCA1	41246512G>A	1036C>T	P346S	missense	rs80357015	Benign	VUS	LIKELY BENIGN	LIKELY BENIGN	BS1 | BP4
BRCA1	41246538T>C	1010A>G	E337G	missense	.	VUS		VUS	VUS	PM2
BRCA1	41246597T>C	951A>G	Q317=	synonymous codon	rs759419385	Benign	LIKELY BENIGN	VUS	LIKELY BENIGN	-
BRCA1	41246663G>A	885C>T	D295=	synonymous codon	.	VUS	LIKELY BENIGN	VUS	VUS	PM2
BRCA1	41246667T>C	881A>G	K294R	missense	.	VUS	VUS	VUS	VUS	PM2
BRCA1	41246696C>G	852G>C	Q284H	missense	.	VUS		VUS	VUS	PM2
BRCA1	41246724C>T	824G>A	G275D	missense	rs397509327	Benign	VUS	BENIGN	BENIGN	BS1 | BS3 | PP3	neutral
BRCA1	41246733T>C	815A>G	E272G	missense	.	VUS		VUS	VUS	PM2 | PP3
BRCA1	41246737C>T	811G>A	V271M	missense	rs80357244	Benign	VUS	BENIGN	BENIGN	BS1 | BS3	neutral
BRCA1	41246747T>C	801A>G	S267=	synonymous codon	.	VUS		VUS	VUS	PM2
BRCA1	41246753A>G	795T>C	S265=	synonymous codon	rs201441987	VUS	BENIGN	VUS	BENIGN	BP6
BRCA1	41246789T>C	759A>G	A253=	synonymous codon	.	VUS		VUS	VUS	PM2
BRCA1	41246791C>T	757G>A	A253T	missense	rs80357293	VUS		VUS	VUS	PM2
BRCA1	41246792A>G	756T>C	R252=	synonymous codon	rs786201338	Benign	LIKELY BENIGN	VUS	LIKELY BENIGN	PM2
BRCA1	41246855C>T	693G>A	T231=	synonymous codon	rs62625298	VUS	LIKELY BENIGN	LIKELY BENIGN	LIKELY BENIGN	BS1
BRCA1	41246856G>A	692C>T	T231M	missense	rs80357001	VUS	VUS	BENIGN	BENIGN	BS1 | BS3 | BP4	neutral
BRCA1	41247881A>G	652T>C	L218=	synonymous codon	rs765950064	Benign	LIKELY BENIGN	VUS	LIKELY BENIGN	-
BRCA1	41247895C>T	638G>A	R213K	missense	.	VUS	VUS	VUS	VUS	BP4 | PM2
BRCA1	41247907G>A	626C>T	P209L	missense	rs201596327	Benign	VUS	VUS	VUS	BP4
BRCA1	41247917G>A	616C>T	Q206*	stop gained	rs397509301	Pathogenic	PATHOGENIC	PATHOGENIC	PATHOGENIC	PVS1 | PM2 | PP5	HRD deficient (high)
BRCA1	41249264C>T	590G>A	C197Y	missense	.	VUS		VUS	VUS	BP4 | PM2
BRCA1	41249283C>T	571G>A	V191I	missense	rs80357090	Benign	BENIGN	BENIGN	BENIGN	BS1 | BS3 | BP6	neutral
BRCA1	41249284G>A	570C>T	T190=	synonymous codon	rs201536070	Benign	LIKELY BENIGN	LIKELY BENIGN	LIKELY BENIGN	BS1
BRCA1	41251811C>T	528G>A	T176=	synonymous codon	rs34545365	Benign	LIKELY BENIGN	LIKELY BENIGN	LIKELY BENIGN	BS1
BRCA1	41251831G>A	508C>T	R170W	missense	rs80357325	VUS	VUS	LIKELY BENIGN	LIKELY BENIGN	BS3 | BP4	neutral
BRCA1	41251834G>A	505C>T	Q169*	stop gained	rs80357133	Pathogenic	PATHOGENIC	PATHOGENIC	PATHOGENIC	PVS1 | PS1 | PM2 | PP5	HRD deficient (high)
BRCA1	41251841C>G	498G>C	R166S	missense	.	VUS		VUS	VUS	PM2
BRCA1	41251881CTG>C	456_457delCA	S153fs	frameshift variant	rs80357882	Pathogenic	PATHOGENIC	PATHOGENIC	PATHOGENIC	PVS1 | PS1 | PM2 | PP5	HRD deficient (high)
BRCA1	41256153C>T	427G>A	E143K	missense	rs80356991	VUS	BENIGN	BENIGN	BENIGN	BS1 | BS3 | BP4 | BP6	neutral
BRCA1	41256154G>A	426C>T	P142=	synonymous codon	rs542687218	Benign	LIKELY BENIGN	LIKELY BENIGN	LIKELY BENIGN	BS1
BRCA1	41256182C>T	398G>A	R133H	missense	rs80357357	Benign	VUS	BENIGN	BENIGN	BS1 | BS3	neutral
BRCA1	41256190G>T	390C>A	Y130*	stop gained	rs80356888	Pathogenic	PATHOGENIC	PATHOGENIC	PATHOGENIC	PVS1 | PS1 | PP5	HRD deficient (high)
BRCA1	41256210T>C	370A>G	I124V	missense	rs80357448	Benign	BENIGN	LIKELY BENIGN	BENIGN	BS3 | BP6 | PM2	neutral
BRCA1	41256228G>C	352C>G	L118V	missense	.	VUS	VUS	VUS	VUS	BP4 | PM2
BRCA1	41256236GGA>G	342_343delTC	P115*	stop gained	rs80357881	Pathogenic	PATHOGENIC	PATHOGENIC	PATHOGENIC	PVS1 | PS1 | PM2 | PP5	HRD deficient (high)
BRCA1	41256246T>A	334A>T	N112Y	missense	.	VUS		VUS	VUS	PM2
BRCA1	41256251T>G	329A>C	K110T	missense	rs397509053	VUS		VUS	VUS	PM2
BRCA1	41256258CA>C	321delT	F107fs	frameshift variant	rs80357544	Pathogenic	PATHOGENIC	PATHOGENIC	PATHOGENIC	PVS1 | PS1 | PM2 | PP5	HRD deficient (high)
BRCA1	41256271G>A	309C>T	N103=	synonymous codon	.	Benign	LIKELY BENIGN	VUS	LIKELY BENIGN	PM2
BRCA1	41256904C>A	282G>T	Q94H	missense	.	VUS		LIKELY BENIGN	LIKELY BENIGN	BS3 | BP4 | PM2	neutral
BRCA1	41256973C>A	213G>T	R71S	missense	.	VUS		LIKELY PATHOGENIC	LIKELY PATHOGENIC	PS3 | PM2	HRD deficient (high)
BRCA1	41258471A>G	212+2T>C		splice donor variant	rs80358026	Pathogenic	PATHOGENIC	PATHOGENIC	PATHOGENIC	PVS1 | PS3 | PM2 | PP3 | PP5	HRD deficient (high)
BRCA1	41258487A>G	198T>C	N66=	synonymous codon	.	Benign	LIKELY BENIGN	VUS	LIKELY BENIGN	BS3 | PM2	neutral
BRCA1	41258489T>C	196A>G	N66D	missense	.	VUS		VUS	VUS	BS3 | PM2	neutral
BRCA1	41258497A>T	188T>A	L63*	stop gained	rs80357086	Pathogenic	PATHOGENIC	PATHOGENIC	PATHOGENIC	PVS1 | PS1 | PP5	HRD deficient (high)
BRCA1	41258510A>C	175T>G	S59A	missense	.	VUS		VUS	VUS	BS3 | PM1 | PM2	neutral
BRCA1	41258531G>A	154C>T	L52F	missense	rs80357084	VUS	VUS	BENIGN	BENIGN	BS1 | BS3 | PM1 | PP3	neutral
BRCA1	41267762A>G	115T>C	C39R	missense	rs80357164	Pathogenic	PATHOGENIC	PATHOGENIC	PATHOGENIC	PS1 | PS3 | PM1 | PM2 | PP3 | PP5	HRD deficient (high)
BRCA1	41267763C>T	114G>A	K38=	synonymous codon	rs1800062	Benign	BENIGN	BENIGN	BENIGN	BA1 | BS3 | BP6	neutral
BRCA1	41267797C>T	81-1G>A		splice acceptor variant	rs80358018	Pathogenic	LIKELY PATHOGENIC	PATHOGENIC	PATHOGENIC	PVS1 | PS3 | PP3 | PP5	HRD deficient (high)
BRCA1	41276043C>T	71G>A	C24Y	missense	rs80357198	VUS	VUS	LIKELY PATHOGENIC	LIKELY PATHOGENIC	PS3 | PM1 | PM2 | PP3	HRD deficient (high)
BRCA1	41276063A>G	51T>C	A17=	synonymous codon	.	VUS		VUS	VUS	BS3 | PM2	neutral
BRCA1	41276070A>G	44T>C	I15T	missense	rs80357316	VUS	VUS	LIKELY PATHOGENIC	LIKELY PATHOGENIC	PS3 | PM2	likely HRD proficient
BRCA1	41276079T>C	35A>G	Q12R	missense	.	VUS	VUS	VUS	VUS	BS3 | PM2	neutral
BRCA1	41276083C>G	31G>C	V11L	missense	.	VUS	VUS	VUS	VUS	PM2
BRCA1	41276094C>T	20G>A	R7H	missense	rs144792613	VUS	VUS	BENIGN	BENIGN	BS1 | BS3 | BP4	neutral
BRCA1	41276105T>C	9A>G	L3=	synonymous codon	rs780157871	VUS		VUS	VUS	BS3 | PM2	neutral

## Sheet:  Hirotsu et al.
Gene	g.HGVS	c.HGVS	p.HGVS	Type	SNP-ID number	Hirotsu et al. classification	MH BRCA DB onsensus	MH BRCA ACMG	MH BRCA Consolidated	ToMMo PF>1%	MH BRCA cons. w/o ToMMo	MH BRCA ACMG criteria	MH Guide predicted PARPi response
BRCA2	32906579A>C	964A>C	K322Q	missense	rs11571640	Benign	VUS	BENIGN	BENIGN	0.0135	VUS	BA1 | BP1	neutral
BRCA2	32910842A>G	2350A>G	M784V	missense	rs11571653	Benign	BENIGN	BENIGN	BENIGN	0.0991	Benign	BA1 | BS3 | BP1 | BP4 | BP6	neutral
BRCA2	32911039A>ACC	2547_2548insCC	Q850fs	stop gained	-	Pathogenic	-	LIKELY PATHOGENIC	LIKELY PATHOGENIC			PVS1 | PM2	HRD deficient
BRCA2	32914137C>A	5645C>A	S1882*	stop gained	rs80358785	Pathogenic	PATHOGENIC	PATHOGENIC	PATHOGENIC			PVS1 | PS1 | PP5	HRD deficient
BRCA2	32914277A>G	5785A>G	I1929V	missense	rs79538375	Benign	BENIGN	BENIGN	BENIGN			BS1 | BS3 | BP1 |BP4 | BP6	neutral
BRCA2	32914461A>C	5969A>C	D1990A	missense	rs148618542	VUS	VUS	LIKELY BENIGN	LIKELY BENIGN			BS1 | BP1
BRCA2	32914623G>T	6131G>T	G2044V	missense	rs56191579	Benign	VUS	BENIGN	BENIGN	0.0144	VUS	BA1 | BP1 | PP5	neutral
BRCA2	32914817G>A	6325G>A	V2109I	missense	s79456940	Benign	VUS	LIKELY BENIGN	LIKELY BENIGN			BS1 | BP1 |BP4
BRCA2	32914896ACTTAA>A	6405_6409del5	N2135fs	stop gained	rs80359584	Pathogenic	PATHOGENIC	PATHOGENIC	PATHOGENIC			PVS1 | PM2 | PP5	HRD deficient
BRCA2	32920978C>T	6952C>T	R2318*	stop gained	rs80358920	Pathogenic	PATHOGENIC	PATHOGENIC	PATHOGENIC			PVS1 | PS1 | PM2 | PP5	HRD deficient
BRCA2	32930636G>A	7507G>A	V2503I	missense	rs587782191	Likely benign	VUS	LIKELY BENIGN	LIKELY BENIGN			BP1 | BP4
BRCA2	32937362A>G	8023A>G	I2675V	missense	rs397507954	Likely pathogenic	LIKELY PATHOGENIC	LIKELY PATHOGENIC	LIKELY PATHOGENIC			PS3 | PM2 | PP3 | PP5 | BP1	likely HRD proficient
BRCA2	32937526G>T	8187G>T	K2729N	missense	rs80359065	Benign	BENIGN	BENIGN	BENIGN	0.0139	Benign	BA1 | BS3 | BP1 | BP6 | PP3	neutral
BRCA2	32972884A>G	10234A>G	I3412V	missense	rs1801426	Benign	BENIGN	BENIGN	BENIGN	0.0189	Benign	BA1 | BS3 | BP1 | BP4 | BP6	neutral
BRCA1	41222974C>A	4957G>T	V1653L	missense	rs80357261	VUS	-	LIKELY PATHOGENIC	LIKELY PATHOGENIC			PS3 | PM2	HRD deficient
BRCA1	41223048A>G	4883T>C	M1628T	missense	rs4986854	Benign	BENIGN	BENIGN	BENIGN	0.019	Benign	BA1 | BS3 | BP4 | BP6	neutral
BRCA1	41243776CCT>C	3770_3771delAG	E1257fs	stop gained	-	Pathogenic	PATHOGENIC	PATHOGENIC	PATHOGENIC			PVS1 | PS1 | PP5	HRD deficient
BRCA1	41243841T>C	3707A>G	N1236S	missense	rs863224760	VUS	VUS	VUS	VUS			BP4 | PM2
BRCA1	41244495T>C	3053A>G	N1018S	missense	rs1567793093	VUS	-	VUS	VUS			BP4 | PM2
BRCA1	41244748G>A	2800C>T	Q934*	stop gained	rs80357223	Pathogenic	PATHOGENIC	PATHOGENIC	PATHOGENIC			PVS1 | PS1 | PM2 | PP5	HRD deficient
BRCA1	41245594C>CC	1953dupG	K652fs	stop gained	-	Pathogenic	PATHOGENIC	PATHOGENIC	PATHOGENIC			PVS1 | PS1 | PM2 | PP5	HRD deficient
BRCA1	41246737C>T	811G>A	V271M	missense	rs80357244	Benign	LIKELY PATHOGENIC	BENIGN	BENIGN			BS1 | BS3 | PP5	neutral
BRCA1	41258497A>T	188T>A	L63*	stop gained	rs80357086	Pathogenic	PATHOGENIC	PATHOGENIC	PATHOGENIC			PVS1 | PS1 | PP5	HRD deficient
BRCA1	41258531G>A	154C>T	L52F	missense	rs80357084	VUS	VUS	BENIGN	BENIGN			BS1 | BS3 | PM1 | PP3	neutral

## Sheet: Nakagomi et al.
Gene	g.HGVS	c.HGVS	p.HGVS	Type	SNP-ID number	Nakagomi et al. classification	MH BRCA DB onsensus	MH BRCA ACMG	MH BRCA Consolidated	ToMMo PF>1%	MH BRCA cons. w/o ToMMo	MH BRCA ACMG criteria	MH Guide predicted PARPi response
BRCA2	32890650G>A	53G>A	R18H	missense	rs80358762	VUS	BENIGN	BENIGN	BENIGN			BS1 | BS3 | BP1 |BP4 | BP6	neutral
BRCA2	32906579A>C	964A>C	K322Q	missense	rs11571640	Benign	VUS	BENIGN	BENIGN	0.0135	VUS	BA1 | BP1	neutral
BRCA2	32907440C>T	1825C>T	Q609*	stop gained	rs80358472	Pathogenic	PATHOGENIC	PATHOGENIC	PATHOGENIC			PVS1 | PS1 | PM2 | PP5	HRD deficient
BRCA2	32910678T>C	2186T>C	I729T	missense	rs431825296	Benign	VUS	LIKELY BENIGN	LIKELY BENIGN			BS1 | BP1 | BP4
BRCA2	32910842A>G	2350A>G	M784V	missense	rs11571653	Benign	BENIGN	BENIGN	BENIGN	0.0991	BENIGN	BA1 | BS3 | BP1 | BP4 | BP6	neutral
BRCA2	32910859AG>A	2368_2368delG	E790fs	frameshift variant	-	Pathogenic	PATHOGENIC	PATHOGENIC	PATHOGENIC			PVS1 | PM2 | PP5	HRD deficient
BRCA2	32911039A>ACC	2547_2548insCC	Q850fs	frameshift variant	-	Pathogenic	PATHOGENIC	PATHOGENIC	PATHOGENIC			PVS1 | PM2 | PP5	HRD deficient
BRCA2	32911080AT>A	2589delT	Q864fs	frameshift variant	rs397507632	Pathogenic	PATHOGENIC	PATHOGENIC	PATHOGENIC			PVS1 | PS1 | PP5	HRD deficient
BRCA2	32911676C>T	3184C>T	P1062S	missense	rs1555283083	Benign	VUS	LIKELY BENIGN	LIKELY BENIGN			BP1 | BP4 | PM2
BRCA2	32912345GA>G	3854delA	N1287fs	frameshift variant	-	Pathogenic	PATHOGENIC	PATHOGENIC	PATHOGENIC			PVS1 | PM2 | PP5	HRD deficient
BRCA2	32913571TAGAG>T	5080_5083delAGAG	G2281fs	frameshift variant	-	Pathogenic	-	LIKELY PATHOGENIC	LIKELY PATHOGENIC			PVS1 | PM2	HRD deficient
BRCA2	32914137C>A	5645C>A	S1882*	stop gained	rs80358785	Pathogenic	PATHOGENIC	PATHOGENIC	PATHOGENIC			PVS1 | PS1 | PP5	HRD deficient
BRCA2	32914200T>C	5708T>C	I1903T	missense	rs149474191	Benign	VUS	VUS	VUS			BP1
BRCA2	32914277A>G	5785A>G	I1929V	missense	rs79538375	Benign	BENIGN	BENIGN	BENIGN			BS1 | BS3 | BP1 | BP4 | BP6	neutral
BRCA2	32914461A>C	5969A>C	D1990A	missense	rs148618542	VUS	VUS	LIKELY BENIGN	LIKELY BENIGN			BS1 | BP1
BRCA2	32914521T>G	6029T>G	V2010G	missense	-	Benign	VUS	LIKELY BENIGN	LIKELY BENIGN			BS1 | BP1 | BP4
BRCA2	32914623G>T	6131G>T	G2044V	missense	rs56191579	Benign	VUS	BENIGN	BENIGN	0.0144	VUS	BA1 | BP1 | PP5	neutral
BRCA2	32914817G>A	6325G>A	V2109I	missense	s79456940	Benign	VUS	LIKELY BENIGN	LIKELY BENIGN			BS1 | BP1 | BP4
BRCA2	32914893ATAACT>A	6402_6406delTAACT	N2135fs	frameshift variant	-	Pathogenic	PATHOGENIC	PATHOGENIC	PATHOGENIC			PVS1 | PS1 | PP5 | BS1	HRD deficient
BRCA2	32914935CTA>C	6445_6446delAT	I2149fs	frameshift variant	-	Pathogenic	PATHOGENIC	PATHOGENIC	PATHOGENIC			PVS1 | PM2 | PP5	HRD deficient
BRCA2	32920978C>T	6952C>T	R2318*	stop gained	rs80358920	Pathogenic	PATHOGENIC	PATHOGENIC	PATHOGENIC			PVS1 | PS1 | PM2 | PP5	HRD deficient
BRCA2	32937362A>G	8023A>G	I2675V	missense	rs397507954	Pathogenic	LIKELY PATHOGENIC	LIKELY PATHOGENIC	LIKELY PATHOGENIC			PS3 | PM2 | PP3 | PP5 | BP1	likely HRD proficient
BRCA2	32937526G>T	8187G>T	K2729N	missense	rs80359065	Benign	BENIGN	BENIGN	BENIGN	0.0139	BENIGN	BA1 | BS3 | BP1 | BP6 | PP3	neutral
BRCA2	32937635A>G	8296A>G	T2766A	missense	-	Benign	-	LIKELY BENIGN	LIKELY BENIGN			BP1 | BP4
BRCA2	32954192C>T	9166C>T	H3056Y	missense	-	VUS	-	LIKELY BENIGN	LIKELY BENIGN			BP1 | BP4 | PM2
BRCA1	41209091G>C	5255C>G	A1752G	missense	rs80357028	VUS	VUS	VUS	VUS			BS3 | PM1 | PM2	neutral
BRCA1	41222974C>A	4957G>T	V1653L	missense	rs80357261	VUS	-	LIKELY PATHOGENIC	LIKELY PATHOGENIC			PS3 | PM2	HRD deficient
BRCA1	41223048A>G	4883T>C	M1628T	missense	rs4986854	Benign	BENIGN	BENIGN	BENIGN	0.019	BENIGN	BA1 | BS3 | BP4 | BP6	neutral
BRCA1	41223202A>G	4729T>C	S1577P	missense	rs80356909	Benign	VUS	BENIGN	BENIGN			BS1 | BS3 | BP4	neutral
BRCA1	41243776CCT>C	3770_3771delAG	E1257fs	frameshift variant	-	Pathogenic	PATHOGENIC	PATHOGENIC	PATHOGENIC			PVS1 | PS1 | PP5	HRD deficient
BRCA1	41243841T>C	3707A>G	N1236S	missense	rs863224760	Benign	VUS	VUS	VUS			BP4 | PM2
BRCA1	41244175A>T	3373T>A	S1125T	missense	-	VUS	-	VUS	VUS			PM2
BRCA1	41244495T>C	3053A>G	N1018S	missense	rs1567793093	Benign	-	VUS	VUS			BP4 | PM2
BRCA1	41244748G>A	2800C>T	Q934*	stop gained	rs80357223	Pathogenic	PATHOGENIC	PATHOGENIC	PATHOGENIC			PVS1 | PS1 | PM2 | PP5	HRD deficient
BRCA1	41244982A>G	2566T>C	Y856H	missense	rs80356892	Benign	BENIGN	LIKELY BENIGN	BENIGN			BS3 | BP6	neutral
BRCA1	41245594A>AG	1952_1953insG	K652fs	frameshift variant	-	Pathogenic	-	LIKELY PATHOGENIC	LIKELY PATHOGENIC			PVS1 | PM2	HRD deficient
BRCA1	41246346C>T	1202G>A	G401E	missense	rs397507184	Benign	VUS	VUS	VUS			BP4 | PM2
BRCA1	41246737C>T	811G>A	V271M	missense	rs80357244	VUS	LIKELY PATHOGENIC	BENIGN	BENIGN			BS1 | BS3 | PP5	neutral
BRCA1	41256904C>A	282G>T	Q94H	missense	-	VUS	-	LIKELY BENIGN	LIKELY BENIGN			BS3 | BP4 | PM2	neutral
BRCA1	41258497A>T	188T>A	L63*	stop gained	rs80357086	Pathogenic	PATHOGENIC	PATHOGENIC	PATHOGENIC			PVS1 | PS1 | PP5	HRD deficient
BRCA1	41258531G>A	154C>T	L52F	missense	rs80357084	VUS	VUS	BENIGN	BENIGN			BS1 | BS3 | PM1 | PP3	neutral

## Sheet: Arai et al.
Gene	g.HGVS	c.HGVS	p.HGVS	Type	SNP-ID number	Arai et al. Classification	MH BRCA DB onsensus	MH BRCA ACMG	MH BRCA Consolidated	ToMMo PF>1%	MH BRCA cons. w/o ToMMo	MH BRCA ACMG criteria	MH Guide predicted PARPi response
BRCA2	32890650G>A	53G>A	R18H	missense	rs80358762	Likely benign	BENIGN	BENIGN	BENIGN			BS1 | BS3 | BP1 | BP4 | BP6	neutral
BRCA2	32893237T>A	91T>A	W31R	missense	-	Likely pathogenic	-	LIKELY PATHOGENIC	LIKELY PATHOGENIC			PS3 | PM2 | PP3 | BP1	HRD deficient
BRCA2	32893242T>G	96T>G	F32L	missense	rs1555280339	VUS	VUS	VUS	VUS			PM2 | PP3 | BP1
BRCA2	32893396C>G	250C>G	Q84E	missense	rs80358515	VUS	VUS	VUS	VUS			PM2 | BP1
BRCA2	32899203A>G	317-10A>G		intron variant	rs81002824	Likely benign	-	VUS	VUS			-
BRCA2	32900244TGTT>T	433_435delGTT	V145del	cds indel	-	Likely benign	-	VUS	VUS			PM2 | PM4
BRCA2	32900288G>A	475+1G>A		splice donor variant	rs81002797	Likely pathogenic	PATHOGENIC	PATHOGENIC	PATHOGENIC			PVS1 | PS3 | PP3 | PP5	HRD deficient
BRCA2	32900296A>T	475+9A>T		intron variant	-	VUS	-	VUS	VUS			PM2
BRCA2	32900624C>A	517-12C>A		intron variant	rs398122795	VUS	-	VUS	VUS			-
BRCA2	32900634A>G	517-2A>G		splice acceptor variant	rs81002858	VUS	LIKELY PATHOGENIC	PATHOGENIC	PATHOGENIC			PVS1 | PS3 | PM2 | PP3 | PP5	HRD deficient
BRCA2	32900670T>C	551T>C	L184P	missense	rs80358775	Likely benign	VUS	VUS	VUS			PM2 | PP3 | BP1
BRCA2	32900742T>G	623T>G	V208G	missense	rs80358865	VUS	VUS	LIKELY BENIGN	LIKELY BENIGN			BS1 | BP1 | PP3
BRCA2	32905055G>T	682-1G>T		splice acceptor variant	rs81002831	Likely pathogenic	PATHOGENIC	PATHOGENIC	PATHOGENIC			PVS1 | PM2 | PP3 | PP5	HRD deficient
BRCA2	32905128GACAG>G	755_758del4	D252fs	frameshift variant	-	Pathogenic	PATHOGENIC	PATHOGENIC	PATHOGENIC			PVS1 | PM2 | PP5	HRD deficient
BRCA2	32906420A>AA	805dupA	T269fs	frameshift variant	rs886040744	Pathogenic	-	LIKELY PATHOGENIC	LIKELY PATHOGENIC			PVS1 | PM2	HRD deficient
BRCA2	32906892AA>A	1278delA	D427fs	frameshift variant	rs80359274	Pathogenic	PATHOGENIC	PATHOGENIC	PATHOGENIC			PVS1 | PM2 | PP5	HRD deficient
BRCA2	32906910AGA>A	1296_1297delGA	N433fs	frameshift variant	-	Pathogenic	PATHOGENIC	PATHOGENIC	PATHOGENIC			PVS1 | PM2 | PP5	HRD deficient
BRCA2	32907014A>T	1399A>T	K467*	stop gained	rs80358427	Pathogenic	PATHOGENIC	PATHOGENIC	PATHOGENIC			PVS1 | PS1 | PP5	HRD deficient
BRCA2	32907252GCTCACAGAAGGAG>G	1638_1650del13	C546fs	frameshift variant	-	Pathogenic	-	LIKELY PATHOGENIC	LIKELY PATHOGENIC			PVS1 | PM2	HRD deficient
BRCA2	32907427AA>A	1813delA	I605fs	frameshift variant	rs80359306	Pathogenic	PATHOGENIC	PATHOGENIC	PATHOGENIC			PVS1 | PM2 | PP5	HRD deficient
BRCA2	32907428A>AA	1813dupA	I605fs	frameshift variant	rs80359306	Pathogenic	PATHOGENIC	PATHOGENIC	PATHOGENIC			PVS1 | PM2 | PP5	HRD deficient
BRCA2	32911242T>C	2750T>C	V917A	missense	-	VUS	VUS	LIKELY BENIGN	LIKELY BENIGN			BP1 | BP4 | PM2
BRCA2	32911299AACAA>A	2808_2811del4	A938fs	frameshift variant	rs80359351	Pathogenic	PATHOGENIC	PATHOGENIC	PATHOGENIC			PVS1 | PM2 | PP5	HRD deficient
BRCA2	32911555AC>A	3064delC	H1022fs	frameshift variant	-	Pathogenic	-	LIKELY PATHOGENIC	LIKELY PATHOGENIC			PVS1 | PM2	HRD deficient
BRCA2	32911686TTAAT>T	3195_3198del4	N1066fs	frameshift variant	rs80359375	Pathogenic	PATHOGENIC	PATHOGENIC	PATHOGENIC			PVS1 | PM2 | PP5	HRD deficient
BRCA2	32911726TT>T	3235delT	S1079fs	frameshift variant	rs397507660	Pathogenic	PATHOGENIC	PATHOGENIC	PATHOGENIC			PVS1 | PM2 | PP5	HRD deficient
BRCA2	32911912T>A	3420T>A	S1140R	missense	-	VUS	VUS	LIKELY BENIGN	LIKELY BENIGN			BP1 | BP4
BRCA2	32912090TGT>T	3599_3600delGT	C1200*	stop gained	rs80359391	Pathogenic	PATHOGENIC	PATHOGENIC	PATHOGENIC			PVS1 | PS1 | PM2 | PP5	HRD deficient
BRCA2	32912387G>T	3895G>T	E1299*	stop gained	-	Pathogenic	-	LIKELY PATHOGENIC	LIKELY PATHOGENIC			PVS1 | PM2	HRD deficient
BRCA2	32912514C>A	4022C>A	S1341*	stop gained	rs1135401901	Pathogenic	PATHOGENIC	PATHOGENIC	PATHOGENIC			PVS1 | PS1 | PM2 | PP5	HRD deficient
BRCA2	32912919A>G	4427A>G	D1476G	missense	rs745425169	VUS	VUS	VUS	VUS			BP1
BRCA2	32912955ACA>A	4464_4465delCA	H1488fs	frameshift variant	-	Pathogenic	PATHOGENIC	PATHOGENIC	PATHOGENIC			PVS1 | PM2 | PP5	HRD deficient
BRCA2	32913059GG>G	4568delG	G1523fs	frameshift variant	-	Pathogenic	-	LIKELY PATHOGENIC	LIKELY PATHOGENIC			PVS1 | PM2	HRD deficient
BRCA2	32913181G>A	4689G>A	W1563*	stop gained	rs886038108	Pathogenic	PATHOGENIC	PATHOGENIC	PATHOGENIC			PVS1 | PS1 | PP5 | BS1	HRD deficient
BRCA2	32913346T>A	4854T>A	D1618E	missense	rs80358708	VUS	VUS	LIKELY BENIGN	LIKELY BENIGN			BS1 | BP1 | BP4
BRCA2	32913621ATGTA>A	5130_5133del4	Y1710*	stop gained	rs80359484	Pathogenic	PATHOGENIC	PATHOGENIC	PATHOGENIC			PVS1 | PS1 | PM2 | PP5	HRD deficient
BRCA2	32913674G>A	5182G>A	D1728N	missense	rs80358744	VUS	VUS	LIKELY BENIGN	LIKELY BENIGN			BP1 | BP4 | PM2
BRCA2	32913809G>C	5317G>C	E1773Q	missense	rs1566232201	VUS	-	LIKELY BENIGN	LIKELY BENIGN			BP1 | BP4 | PM2
BRCA2	32914067ATTAA>A	5576_5579del4	I1859fs	frameshift variant	rs80359520	Pathogenic	PATHOGENIC	PATHOGENIC	PATHOGENIC			PVS1 | PM2 | PP5	HRD deficient
BRCA2	32914137C>A	5645C>A	S1882*	stop gained	rs80358785	Pathogenic	PATHOGENIC	PATHOGENIC	PATHOGENIC			PVS1 | PS1 | PP5	HRD deficient
BRCA2	32914166GG>G	5675delG	G1892fs	frameshift variant	-	Pathogenic	PATHOGENIC	PATHOGENIC	PATHOGENIC			PVS1 | PM2 | PP5	HRD deficient
BRCA2	32914262ATTCA>A	5771_5774del4	I1924fs	frameshift variant	rs80359535	Pathogenic	PATHOGENIC	PATHOGENIC	PATHOGENIC			PVS1 | PM2 | PP5	HRD deficient
BRCA2	32914461A>C	5969A>C	D1990A	missense	rs148618542	Likely benign	VUS	LIKELY BENIGN	LIKELY BENIGN			BS1 | BP1
BRCA2	32914521T>G	6029T>G	V2010G	missense	-	VUS	VUS	LIKELY BENIGN	LIKELY BENIGN			BS1 | BP1 | BP4
BRCA2	32914633T>G	6141T>G	Y2047*	stop gained	-	Pathogenic	-	LIKELY PATHOGENIC	LIKELY PATHOGENIC			PVS1 | PM2	HRD deficient
BRCA2	32914649TC>T	6158delC	S2053fs	frameshift variant	-	Pathogenic	-	LIKELY PATHOGENIC	LIKELY PATHOGENIC			PVS1 | PM2	HRD deficient
BRCA2	32914936TAT>T	6445_6446delAT	I2149*	stop gained	rs80359592	Pathogenic	PATHOGENIC	PATHOGENIC	PATHOGENIC			PVS1 | PS1 | PM2 | PP5	HRD deficient
BRCA2	32914937ATTAAA>A	6446_6450del5	I2149fs	frameshift variant	rs80359593	Pathogenic	PATHOGENIC	PATHOGENIC	PATHOGENIC			PVS1 | PM2 | PP5	HRD deficient
BRCA2	32914959CTC>C	6468_6469delTC	Q2157fs	frameshift variant	-	Pathogenic	PATHOGENIC	PATHOGENIC	PATHOGENIC			PVS1 | PM2 | PP5	HRD deficient
BRCA2	32915007CA>C	6516delA	V2174fs	frameshift variant	-	Pathogenic	-	LIKELY PATHOGENIC	LIKELY PATHOGENIC			PVS1 | PM2	HRD deficient
BRCA2	32915111ACAAA>A	6620_6623del4	T2207fs	frameshift variant	-	Pathogenic	PATHOGENIC	PATHOGENIC	PATHOGENIC			PVS1 | PM2 | PP5	HRD deficient
BRCA2	32915117ATA>A	6626_6627delTA	I2209fs	frameshift variant	-	Pathogenic	PATHOGENIC	PATHOGENIC	PATHOGENIC			PVS1 | PM2 | PP5	HRD deficient
BRCA2	32915120G>T	6628G>T	E2210*	stop gained	-	Pathogenic	-	PATHOGENIC	PATHOGENIC			PVS1 | PS1 | PM2	HRD deficient
BRCA2	32915267AATGA>A	6776_6779delATGA	N2259fs	frameshift variant	-	Pathogenic	-	LIKELY PATHOGENIC	LIKELY PATHOGENIC			PVS1 | PM2	HRD deficient
BRCA2	32918492AGTGGTCAAAACAGAACAAAA>A	6842-202_6842-183del		intron variant	-	VUS	-	VUS	VUS			PM2
BRCA2	32920978C>T	6952C>T	R2318*	stop gained	rs80358920	Pathogenic	PATHOGENIC	PATHOGENIC	PATHOGENIC			PVS1 | PS1 | PM2 | PP5	HRD deficient
BRCA2	32921033G>A	7007G>A	R2336H	missense	rs28897743	Pathogenic	PATHOGENIC	LIKELY PATHOGENIC	LIKELY PATHOGENIC			PS3 | PM2 | PP3 | PP5 | BP1	likely HRD proficient
BRCA2	32929423T>TT	7433dupT	L2478fs	frameshift variant	rs779007406	Pathogenic	-	LIKELY PATHOGENIC	LIKELY PATHOGENIC			PVS1 | PM2	HRD deficient
BRCA2	32930609C>T	7480C>T	R2494*	stop gained	rs80358972	Pathogenic	PATHOGENIC	PATHOGENIC	PATHOGENIC			PVS1 | PS1 | PP5 | BS1	HRD deficient
BRCA2	32930678A>G	7549A>G	T2517A	missense	-	VUS	-	LIKELY BENIGN	LIKELY BENIGN			BP1 | BP4 | PM2
BRCA2	32930687C>T	7558C>T	R2520*	stop gained	rs80358981	Pathogenic	PATHOGENIC	PATHOGENIC	PATHOGENIC			PVS1 | PS1 | PP5 | BS1	HRD deficient
BRCA2	32930731G>T	7602G>T	A2534=	synonymous codon	rs81002826	Likely benign	LIKELY BENIGN	VUS	LIKELY BENIGN			PM2
BRCA2	32931899T>TT	7638dupT	K2547*	frameshift variant	-	Pathogenic	-	LIKELY PATHOGENIC	LIKELY PATHOGENIC			PVS1 | PM2	HRD deficient
BRCA2	32931943A>T	7682A>T	Q2561L	missense	-	VUS	-	VUS	VUS			PM2 | BP1
BRCA2	32937362A>G	8023A>G	I2675V	missense	rs397507954	Likely pathogenic	LIKELY PATHOGENIC	LIKELY PATHOGENIC	LIKELY PATHOGENIC			PS3 | PM2 | PP3 | PP5 | BP1	likely HRD proficient
BRCA2	32944612C>T	8405C>T	P2802L	missense	-	VUS	-	VUS	VUS			PM2 | BP1
BRCA2	32945096A>T	8491A>T	M2831L	missense	rs760663398	VUS	-	VUS	VUS			PM2 | BP1
BRCA2	32945109C>A	8504C>A	S2835*	stop gained	rs80359102	Pathogenic	PATHOGENIC	PATHOGENIC	PATHOGENIC			PVS1 | PS1 | PM2 | PP5	HRD deficient
BRCA2	32945194A>AA	8589dupA	A2864fs	frameshift variant	-	Pathogenic	PATHOGENIC	PATHOGENIC	PATHOGENIC			PVS1 | PM2 | PP5	HRD deficient
BRCA2	32945234G>T	8629G>T	E2877*	stop gained	rs80359121	Pathogenic	PATHOGENIC	PATHOGENIC	PATHOGENIC			PVS1 | PS1 | PM2 | PP5	HRD deficient
BRCA2	32950873A>G	8699A>G	D2900G	missense	-	VUS	-	VUS	VUS			PM2 | PP3 | BP1
BRCA2	32954009C>T	9076C>T	Q3026*	stop gained	rs80359159	Pathogenic	PATHOGENIC	PATHOGENIC	PATHOGENIC			PVS1 | PS1 | PM2 | PP5	HRD deficient
BRCA2	32954042C>T	9109C>T	Q3037*	stop gained	rs397508037	Pathogenic	PATHOGENIC	PATHOGENIC	PATHOGENIC			PVS1 | PS1 | PM2 | PP5	HRD deficient
BRCA2	32954050G>A	9117G>A	P3039=	synonymous codon	rs28897756	Pathogenic	PATHOGENIC	LIKELY PATHOGENIC	LIKELY PATHOGENIC			PS3 | PM2 | PP3 | PP5	HRD deficient
BRCA2	32954180C>T	9154C>T	R3052W	missense	rs45580035	Pathogenic	PATHOGENIC	PATHOGENIC	PATHOGENIC			PS1 | PS3 | PP3 | PP5 | BP1	HRD deficient
BRCA2	32954192C>T	9166C>T	H3056Y	missense	-	VUS	-	LIKELY BENIGN	LIKELY BENIGN			BP1 | BP4 | PM2
BRCA2	32968951C>T	9382C>T	R3128*	stop gained	rs80359212	Pathogenic	PATHOGENIC	PATHOGENIC	PATHOGENIC			PVS1 | PS1 | PP5 | BS1	HRD deficient
BRCA2	32972471T>G	9821T>G	L3274W	missense	rs431825380	VUS	VUS	VUS	VUS			PM2 | PP3 | BP1
BRCA1	41197729T>C	5558A>G	Y1853C	missense	rs80357258	VUS	LIKELY PATHOGENIC	LIKELY PATHOGENIC	LIKELY PATHOGENIC			PS3 | PM1 | PM2 | PP3	HRD deficient
BRCA1	41197784G>A	5503C>T	R1835*	stop gained	rs41293465	Pathogenic	PATHOGENIC	PATHOGENIC	PATHOGENIC			PVS1 | PS1 | PM2 | PP5	HRD deficient
BRCA1	41197809GTGGACACC>G	5470_5477delATTGGGCA	I1824fs	frameshift variant	-	Pathogenic	-	LIKELY PATHOGENIC	LIKELY PATHOGENIC			PVS1 | PM2	HRD deficient
BRCA1	41201197T>G	5347A>C	M1783L	missense	rs80357012	Likely benign	VUS	VUS	VUS			BS3 | PM1	neutral
BRCA1	41203135C>G	5278-1G>C		splice acceptor variant	rs80358099	Pathogenic	PATHOGENIC	PATHOGENIC	PATHOGENIC			PVS1 | PS3 | PM2 | PP3 | PP5	HRD deficient
BRCA1	41215371T>TT	5172dupA	E1725fs	frameshift variant	-	Pathogenic	-	LIKELY PATHOGENIC	LIKELY PATHOGENIC			PVS1 | PM2	HRD deficient
BRCA1	41215898G>T	5145C>A	S1715R	missense	rs80357094	Likely pathogenic	PATHOGENIC	PATHOGENIC	PATHOGENIC			PS1 | PS3 | PM2 | PP5	HRD deficient
BRCA1	41215977T>C	5075-9A>G		intron variant	rs80358059	VUS	LIKELY BENIGN	VUS	LIKELY BENIGN			BS3 | PM2	neutral
BRCA1	41219622T>C	5074+3A>G		intron variant	rs80358181	Pathogenic	PATHOGENIC	LIKELY PATHOGENIC	LIKELY PATHOGENIC			PS3 | PM2 | PP3 | PP5	HRD deficient
BRCA1	41222967G>A	4964C>T	S1655F	missense	rs80357390	Likely pathogenic	LIKELY PATHOGENIC	LIKELY PATHOGENIC	LIKELY PATHOGENIC			PS3 | PM2 | PP5	HRD deficient
BRCA1	41222996C>G	4935G>C	R1645S	missense	rs80357373	VUS	-	VUS	VUS			BS3 l PM2	neutral
BRCA1	41223171G>A	4760C>T	S1587L	missense	-	VUS	-	VUS	VUS			BP4 l PM2
BRCA1	41234439G>GTTGA	4338_4339insTCAA	Q1447fs	frameshift variant	-	Pathogenic	-	LIKELY PATHOGENIC	LIKELY PATHOGENIC			PVS1 | PM2	HRD deficient
BRCA1	41243012G>A	4134C>T	V1378=	synonymous codon	-	VUS	-	VUS	VUS			PM2
BRCA1	41243479CTTGA>C	4065_4068delTCAA	N1355fs	frameshift variant	rs80357508	Pathogenic	PATHOGENIC	PATHOGENIC	PATHOGENIC			PVS1 | PS1 | PP5	HRD deficient
BRCA1	41243538T>C	4010A>G	D1337G	missense	-	VUS	-	VUS	VUS			PM2
BRCA1	41243675A>T	3873T>A	C1291*	stop gained	-	Pathogenic	-	LIKELY PATHOGENIC	LIKELY PATHOGENIC			PVS1 | PM2	HRD deficient
BRCA1	41243908C>A	3640G>T	E1214*	stop gained	rs80356923	Pathogenic	PATHOGENIC	PATHOGENIC	PATHOGENIC			PVS1 | PS1 | PM2 | PP5	HRD deficient
BRCA1	41243967G>GGGGT	3580_3581insACCC	T1194fs	frameshift variant	-	Pathogenic	-	LIKELY PATHOGENIC	LIKELY PATHOGENIC			PVS1 | PM2	HRD deficient
BRCA1	41244099G>C	3449C>G	P1150R	missense	rs1064796059	VUS		VUS	VUS			PM2 | PP3
BRCA1	41244105TC>T	3442delG	E1148fs	frameshift variant	rs80357808	Pathogenic	PATHOGENIC	PATHOGENIC	PATHOGENIC			PVS1 | PS1 | PM2 | PP5	HRD deficient
BRCA1	41244196G>A	3352C>T	Q1118*	stop gained	rs397507215	Pathogenic	PATHOGENIC	PATHOGENIC	PATHOGENIC			PVS1 | PS1 | PM2 | PP5	HRD deficient
BRCA1	41244748G>A	2800C>T	Q934*	stop gained	rs80357223	Pathogenic	PATHOGENIC	PATHOGENIC	PATHOGENIC			PVS1 | PS1 | PM2 | PP5	HRD deficient
BRCA1	41244822T>A	2726A>T	N909I	missense	rs80357127	Likely benign	VUS	VUS	VUS			BS1 | PP5
BRCA1	41244826C>A	2722G>T	E908*	stop gained	rs80356978	Pathogenic	PATHOGENIC	PATHOGENIC	PATHOGENIC			PVS1 | PS1 | PP5	HRD deficient
BRCA1	41244861CT>C	2686delA	S896fs	frameshift variant	rs80357636	Pathogenic	PATHOGENIC	PATHOGENIC	PATHOGENIC			PVS1 | PS1 | PM2 | PP5	HRD deficient
BRCA1	41244935CGG>C	2611_2612delCC	P871fs	frameshift variant	rs80357962	Pathogenic	PATHOGENIC	PATHOGENIC	PATHOGENIC			PVS1 | PS1 | PM2 | PP5	HRD deficient
BRCA1	41244984T>G	2564A>C	Q855P	missense	rs768001441	VUS	VUS	VUS	VUS			PM2 | PP3
BRCA1	41245021T>C	2527A>G	T843A	missense	rs80357435	VUS	VUS	VUS	VUS			BP4 | PM2
BRCA1	41245034GT>G	2513delA	N838fs	frameshift variant	rs80357863	Pathogenic	PATHOGENIC	PATHOGENIC	PATHOGENIC			PVS1 | PS1 | PM2 | PP5	HRD deficient
BRCA1	41245157TTC>T	2389_2390delGA	E797fs	frameshift variant	rs80357695	Pathogenic	PATHOGENIC	PATHOGENIC	PATHOGENIC			PVS1 | PS1 | PM2 | PP5	HRD deficient
BRCA1	41245489G>A	2059C>T	Q687*	stop gained	rs273898674	Pathogenic	PATHOGENIC	PATHOGENIC	PATHOGENIC			PVS1 | PS1 | PM2 | PP5	HRD deficient
BRCA1	41245669C>T	1879G>A	V627I	missense	rs80357425	Likely benign	VUS	VUS	VUS			-
BRCA1	41245927G>A	1621C>T	Q541*	stop gained	rs80356904	Pathogenic	PATHOGENIC	PATHOGENIC	PATHOGENIC			PVS1 | PS1 | PM2 | PP5	HRD deficient
BRCA1	41246039CTTTAA>C	1504_1508delTTAAA	L502fs	frameshift variant	rs80357888	Pathogenic	PATHOGENIC	PATHOGENIC	PATHOGENIC			PVS1 | PS1 | PP5	HRD deficient
BRCA1	41246191C>G	1357G>C	E453Q	missense	rs768054411	VUS	VUS	VUS	VUS			PM2 | PP3
BRCA1	41246260C>CT	1287dupA	D430fs	frameshift variant	rs80357576	Pathogenic	PATHOGENIC	PATHOGENIC	PATHOGENIC			PVS1 | PM2 | PP5	HRD deficient
BRCA1	41246323CT>C	1224delA	V409*	stop gained	rs879255320	Pathogenic	PATHOGENIC	PATHOGENIC	PATHOGENIC			PVS1 | PS1 | PM2 | PP5	HRD deficient
BRCA1	41246346C>T	1202G>A	G401E	missense	rs397507184	VUS	VUS	VUS	VUS			BP4 | PM2
BRCA1	41246494C>A	1054G>T	E352*	stop gained	rs80357472	Pathogenic	PATHOGENIC	PATHOGENIC	PATHOGENIC			PVS1 | PS1 | PP5	HRD deficient
BRCA1	41246507CAG>C	1039_1040delCT	L347fs	frameshift variant	rs397508827	Pathogenic	PATHOGENIC	PATHOGENIC	PATHOGENIC			PVS1 | PS1 | PM2 | PP5	HRD deficient
BRCA1	41246772T>A	776A>T	E259V	missense	-	VUS	-	VUS	VUS			PM2 | PP3
BRCA1	41246847GT>G	700delA	T234fs	frameshift variant	-	Pathogenic	-	LIKELY PATHOGENIC	LIKELY PATHOGENIC			PVS1 | PM2	HRD deficient
BRCA1	41247907G>A	626C>T	P209L	missense	rs201596327	VUS	VUS	VUS	VUS			BP4
BRCA1	41251852TCA>T	485_486delTG	V162fs	frameshift variant	-	Pathogenic	PATHOGENIC	PATHOGENIC	PATHOGENIC			PVS1 | PS1 | PM2 | PP5	HRD deficient
BRCA1	41251867TAG>T	470_471delCT	S157*	stop gained	-	Pathogenic	PATHOGENIC	PATHOGENIC	PATHOGENIC			PVS1 | PS1 | PM2 | PP5	HRD deficient
BRCA1	41251881CTG>C	456_457delCA	S153fs	frameshift variant	rs80357882	Pathogenic	PATHOGENIC	PATHOGENIC	PATHOGENIC			PVS1 | PS1 | PM2 | PP5	HRD deficient
BRCA1	41256153C>A	427G>T	E143*	stop gained	rs80356991	Pathogenic	PATHOGENIC	PATHOGENIC	PATHOGENIC			PVS1 | PS1 | PM2 | PP5	HRD deficient
BRCA1	41256182C>T	398G>A	R133H	missense	rs80357357	Likely benign	VUS	BENIGN	BENIGN			BS1 | BS3	neutral
BRCA1	41256945G>A	241C>T	Q81*	stop gained	rs80357350	Pathogenic	PATHOGENIC	PATHOGENIC	PATHOGENIC			PVS1 | PS1 | PM2 | PP5	HRD deficient
BRCA1	41258495A>G	190T>C	C64R	missense	rs80357064	Pathogenic	PATHOGENIC	PATHOGENIC	PATHOGENIC			PS3 | PM1 | PM2 | PP3 | PP5	HRD deficient
BRCA1	41258497A>T	188T>A	L63*	stop gained	rs80357086	Pathogenic	PATHOGENIC	PATHOGENIC	PATHOGENIC			PVS1 | PS1 | PP5	HRD deficient
BRCA1	41258507G>A	178C>T	Q60*	stop gained	rs80357471	Pathogenic	PATHOGENIC	PATHOGENIC	PATHOGENIC			PVS1 | PS1 | PM2 | PP5	HRD deficient
BRCA1	41258531G>A	154C>T	L52F	missense	rs80357084	Likely benign	VUS	BENIGN	BENIGN			BS1 | BS3 | PM1 | PP3	neutral
BRCA1	41258552T>C	135-2A>G		splice acceptor variant	rs80358065	Likely pathogenic	PATHOGENIC	PATHOGENIC	PATHOGENIC			PVS1 | PS3 | PM2 | PP3 | PP5	HRD deficient
BRCA1	41258552T>G	135-2A>C		splice acceptor variant	-	Likely pathogenic	-	PATHOGENIC	PATHOGENIC			PVS1 | PS3 | PM2 | PP3	HRD deficient
BRCA1	41276043C>T	71G>A	C24Y	missense	rs80357198	Pathogenic	VUS	PATHOGENIC	PATHOGENIC			PS3 | PM1 | PM2 | PP3 | PP5	HRD deficient
BRCA1	41276044ACT>A	68_69delAG	E23fs	frameshift variant	-	Pathogenic	PATHOGENIC	PATHOGENIC	PATHOGENIC			PVS1 | PS1 | PP5 | BS1	HRD deficient
BRCA1	41276047C>CT	66dupA	E23fs	frameshift variant	rs80357783	Pathogenic	PATHOGENIC	PATHOGENIC	PATHOGENIC			PVS1 | PM2 | PP5	HRD deficient

## Sheet: ENIGMA
Gene	g.HGVS	c.HGVS	p.HGVS	Type	SNP-ID number	ENIGMA classification	MH BRCA ACMG	MH BRCA ACMG criteria	MH Guide predicted PARPi response
BRCA2	32889968G>A	-40+164G>A		utr variant 5 prime	rs206119	benign	BENIGN	BA1 | BP6	neutral
BRCA2	32889996C>T	-40+192C>T		utr variant 5 prime	rs11571572	benign	BENIGN	BA1 | BP6	neutral
BRCA2	32890026C>T	-40+222C>T		utr variant 5 prime	rs9562605	benign	BENIGN	BA1 | BP6	neutral
BRCA2	32890164G>A	-40+360G>A		utr variant 5 prime	rs115797182	benign	BENIGN	BA1 | BP6	neutral
BRCA2	32890227G>T	-39-332G>T		utr variant 5 prime	rs9567552	benign	BENIGN	BA1 | BP6	neutral
BRCA2	32890572G>A	-26G>A		utr variant 5 prime	rs1799943	benign	BENIGN	BA1 | BP6	neutral
BRCA2	32890587C>T	-11C>T		utr variant 5 prime	rs76874770	benign	BENIGN	BA1 | BS3 | BP6	neutral
BRCA2	32890601CC>C	5del	P2fs	frameshift variant	rs397507820	pathogenic	PATHOGENIC	PVS1 | PM2 | PP5	HRD deficient
BRCA2	32890607G>T	10G>T	G4*	stop gained	rs397507571	pathogenic	PATHOGENIC	PVS1 | PM2 | PP5	HRD deficient
BRCA2	32890611CC>C	15del	E7fs	frameshift variant	rs1064795072	pathogenic	PATHOGENIC	PVS1 | PM2 | PP5	HRD deficient
BRCA2	32890613AAA>A	17_18del	K6fs	frameshift variant	rs80359298	pathogenic	PATHOGENIC	PVS1 | PS1 | PM2 | PP5	HRD deficient
BRCA2	32890614AAG>A	22_23del	R8fs	frameshift variant	rs397507623	pathogenic	PATHOGENIC	PVS1 | PS1 | PM2 | PP5	HRD deficient
BRCA2	32890622CC>C	26del	P9fs	frameshift variant	rs80359343	pathogenic	PATHOGENIC	PVS1 | PM2 | PP5	HRD deficient
BRCA2	32890624A>G	27A>G	P9=	synonymous codon	rs786201444	likely benign	VUS	PM2
BRCA2	32890627A>G	30A>G	T10=	synonymous codon	rs864622207	likely benign	VUS	PM2
BRCA2	32890632TT>T	36del	F12fs	frameshift variant	rs80359393	pathogenic	PATHOGENIC	PVS1 | PM2 | PP5	HRD deficient
BRCA2	32890633T>TT	36dup	E13*	stop gained	rs80359393	pathogenic	PATHOGENIC	PVS1 | PM2 | PP5	HRD deficient
BRCA2	32890633TGAAATTTT>T	37_44del	E13*	stop gained	rs397507687	pathogenic	PATHOGENIC	PVS1 | PM2 | PP5	HRD deficient
BRCA2	32890634G>GT	37_38insT	E13fs	frameshift variant	rs80359400	pathogenic	PATHOGENIC	PVS1 | PM2 | PP5	HRD deficient
BRCA2	32890634G>T	37G>T	E13*	stop gained	rs80358622	pathogenic	PATHOGENIC	PVS1 | PM2 | PP5	HRD deficient
BRCA2	32890644AGAC>AATCGATCGAT	48_50delinsATCGATCGAT	T17fs	frameshift variant	rs483353081	pathogenic	PATHOGENIC	PVS1 | PS1 | PM2 | PP5	HRD deficient
BRCA2	32890645G>GG	48dup	T17fs	frameshift variant	rs886040552	pathogenic	PATHOGENIC	PVS1 | PM2 | PP5	HRD deficient
BRCA2	32890645GAC>G	51_52del	R18fs	frameshift variant	rs80359483	pathogenic	PATHOGENIC	PVS1 | PM2 | PP5	HRD deficient
BRCA2	32890648A>AA	51dup	R18fs	frameshift variant	rs397507772	pathogenic	PATHOGENIC	PVS1 | PM2 | PP5	HRD deficient
BRCA2	32890648ACGCTGCAACA>A	52_61del	R18fs	frameshift variant	rs886040574	pathogenic	PATHOGENIC	PVS1 | PS1 | PM2 | PP5	HRD deficient
BRCA2	32890650G>A	53G>A	R18H	missense	rs80358762	benign	BENIGN	BS1 | BS3 | BP4 | BP6	neutral
BRCA2	32890654C>T	57C>T	C19=	synonymous codon	rs878853592	likely benign	VUS	PM2
BRCA2	32890659AA>A	63del	A22fs	frameshift variant	rs80359582	pathogenic	PATHOGENIC	PVS1 | PS1 | PM2 | PP5	HRD deficient
BRCA2	32890722A>C	67+58A>C		intron variant	rs538947930	benign	LIKELY BENIGN	BS1 | BP6 | PM2
BRCA2	32890990G>C	67+326G>C		intron variant	rs11571575	benign	BENIGN	BA1 | BP6	neutral
BRCA2	32891305T>C	67+641T>C		intron variant	rs11571576	benign	BENIGN	BA1 | BP6	neutral
BRCA2	32891383T>A	67+719T>A		intron variant	rs191749285	benign	LIKELY BENIGN	BS1 | BP6
BRCA2	32891451CAAGT>C	67+788_67+791del		intron variant	rs11571577	benign	BENIGN	BA1 | BP6	neutral
BRCA2	32891706A>G	67+1042A>G		intron variant	rs206120	benign	BENIGN	BA1 | BP6	neutral
BRCA2	32891766T>C	67+1102T>C		intron variant	rs11571578	benign	BENIGN	BA1 | BP6	neutral
BRCA2	32891798T>C	67+1134T>C		intron variant	rs11571579	benign	BENIGN	BA1 | BP6	neutral
BRCA2	32891888T>TT	67+1224dup		intron variant	rs145615358	benign	BENIGN	BA1 | BP6	neutral
BRCA2	32891930C>T	67+1266C>T		intron variant	rs11571580	benign	BENIGN	BA1 | BP6	neutral
BRCA2	32892217C>T	68-997C>T		intron variant	rs206121	benign	BENIGN	BA1 | BP6	neutral
BRCA2	32892240CAGT>C	68-973_68-971del		intron variant	rs11571581	benign	BENIGN	BA1 | BP6	neutral
BRCA2	32892669C>T	68-545C>T		intron variant	rs142569349	benign	BENIGN	BA1 | BP6	neutral
BRCA2	32892694G>T	68-520G>T		intron variant	rs11571582	benign	BENIGN	BA1 | BP6	neutral
BRCA2	32892735T>C	68-479T>C		intron variant	rs206122	benign	BENIGN	BA1 | BP6	neutral
BRCA2	32892760A>C	68-454A>C		intron variant	rs11571583	benign	BENIGN	BA1 | BP6	neutral
BRCA2	32892820T>C	68-394T>C		intron variant	rs11571584	benign	BENIGN	BA1 | BP6	neutral
BRCA2	32892875G>A	68-339G>A		intron variant	rs11571585	benign	BENIGN	BA1 | BP6	neutral
BRCA2	32892885G>A	68-329G>A		intron variant	rs11571586	benign	BENIGN	BA1 | BP6	neutral
BRCA2	32893207T>A	68-7T>A		intron variant	rs81002830	benign	BENIGN	BS1 | BS3 | BP4 | BP6	neutral
BRCA2	32893216TT>T	71del	L24*	stop gained	rs397507903	pathogenic	PATHOGENIC	PVS1 | PS1 | PM2 | PP5	HRD deficient
BRCA2	32893216TTAGGACCAATAAGTCTTAATTGGTTT>T	71_96del	L24*	stop gained	rs80359637	pathogenic	PATHOGENIC	PVS1 | PS1 | PM2 | PP5	HRD deficient
BRCA2	32893217T>A	71T>A	L24*	stop gained	rs397507902	pathogenic	PATHOGENIC	PVS1 | PS1 | PM2 | PP5	HRD deficient
BRCA2	32893217T>G	71T>G	L24*	stop gained	rs397507902	pathogenic	PATHOGENIC	PVS1 | PS1 | PM2 | PP5	HRD deficient
BRCA2	32893219G>T	73G>T	G25*	stop gained	rs80358961	pathogenic	PATHOGENIC	PVS1 | PS1 | PM2 | PP5	HRD deficient
BRCA2	32893224A>G	78A>G	P26=	synonymous codon	rs772146565	likely benign	LIKELY BENIGN	BS1
BRCA2	32893226TAAG>TTAAGACT	81_83delinsTAAGACT	S28fs	frameshift variant	rs879255300	pathogenic	PATHOGENIC	PVS1 | PM2 | PP5	HRD deficient
BRCA2	32893231CTT>C	86_87del	L29fs	frameshift variant	rs80359722	pathogenic	PATHOGENIC	PVS1 | PS1 | PM2 | PP5	HRD deficient
BRCA2	32893236T>C	90T>C	N30=	synonymous codon	rs760655471	likely benign	LIKELY BENIGN	BS1
BRCA2	32893238G>A	92G>A	W31*	stop gained	rs397508045	pathogenic	PATHOGENIC	PVS1 | PS1 | PM2 | PP5	HRD deficient
BRCA2	32893239G>A	93G>A	W31*	stop gained	rs80359214	pathogenic	PATHOGENIC	PVS1 | PS1 | PM2 | PP5	HRD deficient
BRCA2	32893243G>T	97G>T	E33*	stop gained	rs397508065	pathogenic	PATHOGENIC	PVS1 | PS1 | PM2 | PP5	HRD deficient
BRCA2	32893246G>T	100G>T	E34*	stop gained	rs80358391	pathogenic	PATHOGENIC	PVS1 | PS1 | PM2 | PP5	HRD deficient
BRCA2	32893248A>G	102A>G	E34=	synonymous codon	rs762819719	likely benign	VUS	PM2
BRCA2	32893249C>CC	103dup	L35fs	frameshift variant	rs886040340	pathogenic	PATHOGENIC	PVS1 | PS1 | PM2 | PP5	HRD deficient
BRCA2	32893249CTTTCTTC>C	104_110del	L35fs	frameshift variant	rs886040341	pathogenic	PATHOGENIC	PVS1 | PS1 | PM2 | PP5	HRD deficient
BRCA2	32893251TTCTT>T	106_109del	S36fs	frameshift variant	rs1555280340	pathogenic	PATHOGENIC	PVS1 | PS1 | PM2 | PP5	HRD deficient
BRCA2	32893252T>TT	106dup	S36fs	frameshift variant	rs80359262	pathogenic	PATHOGENIC	PVS1 | PS1 | PM2 | PP5	HRD deficient
BRCA2	32893254TTCAG>T	109_112del	S37fs	frameshift variant	rs886040344	pathogenic	PATHOGENIC	PVS1 | PS1 | PM2 | PP5	HRD deficient
BRCA2	32893256C>A	110C>A	S37*	stop gained	rs886040346	pathogenic	PATHOGENIC	PVS1 | PS1 | PM2 | PP5	HRD deficient
BRCA2	32893256C>G	110C>G	S37*	stop gained	rs886040346	pathogenic	PATHOGENIC	PVS1 | PS1 | PM2 | PP5	HRD deficient
BRCA2	32893260AG>A	115del	A39fs	frameshift variant	rs397507573	pathogenic	PATHOGENIC	PVS1 | PS1 | PM2 | PP5	HRD deficient
BRCA2	32893265CACCC>C	120_123del	P41fs	frameshift variant	rs886038047	pathogenic	PATHOGENIC	PVS1 | PS1 | PM2 | PP5	HRD deficient
BRCA2	32893269C>G	123C>G	P41=	synonymous codon	rs786201783	likely benign	VUS	PM2
BRCA2	32893271A>G	125A>G	Y42C	missense	rs4987046	benign	BENIGN	BS1 | BS3 | BP1 | BP4 | BP6	neutral
BRCA2	32893272T>A	126T>A	Y42*	stop gained	rs886040353	pathogenic	PATHOGENIC	PVS1 | PS1 | PM2 | PP5	HRD deficient
BRCA2	32893272TAA>T	127_128del	N43fs	frameshift variant	rs886040354	pathogenic	PATHOGENIC	PVS1 | PS1 | PM2 | PP5	HRD deficient
BRCA2	32893273AA>A	128del	N43fs	frameshift variant	rs80359275	pathogenic	PATHOGENIC	PVS1 | PS1 | PM2 | PP5	HRD deficient
BRCA2	32893278T>TATAATTCT	125_132dup	E45fs	frameshift variant	rs483353112	pathogenic	PATHOGENIC	PVS1 | PS1 | PM2 | PP5	HRD deficient
BRCA2	32893279G>T	133G>T	E45*	stop gained	rs397507581	pathogenic	PATHOGENIC	PVS1 | PS1 | PM2 | PP5	HRD deficient
BRCA2	32893289AA>A	144del	E49fs	frameshift variant	rs864622434	pathogenic	PATHOGENIC	PVS1 | PS1 | PM2 | PP5	HRD deficient
BRCA2	32893291G>T	145G>T	E49*	stop gained	rs80358435	pathogenic	PATHOGENIC	PVS1 | PS1 | PM2 | PP5	HRD deficient
BRCA2	32893296TG>T	151del	E51fs	frameshift variant	rs80359287	pathogenic	PATHOGENIC	PVS1 | PS1 | PM2 | PP5	HRD deficient
BRCA2	32893305AAA>A	160_161del	N54fs	frameshift variant	rs878853297	pathogenic	PATHOGENIC	PVS1 | PS1 | PM2 | PP5	HRD deficient
BRCA2	32893306AA>A	161del	N54fs	frameshift variant	rs878853297	pathogenic	PATHOGENIC	PVS1 | PS1 | PM2 | PP5	HRD deficient
BRCA2	32893307AC>A	162del	N54fs	frameshift variant	rs1064794059	pathogenic	PATHOGENIC	PVS1 | PS1 | PM2 | PP5	HRD deficient
BRCA2	32893311C>T	165C>T	N55=	synonymous codon	rs779367922	likely benign	VUS	PM2
BRCA2	32893313A>C	167A>C	N56T	missense	rs80358454	benign	LIKELY BENIGN	BS3 | BP1 | BP4 | BP6	neutral
BRCA2	32893316A>AA	170dup	Y57*	stop gained	rs80359299	pathogenic	PATHOGENIC	PVS1 | PS1 | PM2 | PP5	HRD deficient
BRCA2	32893316AC>A	171del	Y57*	stop gained	rs1555280367	pathogenic	PATHOGENIC	PVS1 | PS1 | PM2 | PP5	HRD deficient
BRCA2	32893317C>A	171C>A	Y57*	stop gained	rs201523522	pathogenic	PATHOGENIC	PVS1 | PS1 | PM2 | PP5	HRD deficient
BRCA2	32893317C>G	171C>G	Y57*	stop gained	rs201523522	pathogenic	PATHOGENIC	PVS1 | PS1 | PM2 | PP5	HRD deficient
BRCA2	32893317C>T	171C>T	Y57=	synonymous codon	rs201523522	likely benign	VUS	PM2
BRCA2	32893318G>T	172G>T	E58*	stop gained	rs397507603	pathogenic	PATHOGENIC	PVS1 | PS1 | PM2 | PP5	HRD deficient
BRCA2	32893321CC>C	176del	P59fs	frameshift variant	rs876660504	pathogenic	PATHOGENIC	PVS1 | PS1 | PM2 | PP5	HRD deficient
BRCA2	32893326C>T	180C>T	N60=	synonymous codon	rs1131692130	likely benign	VUS	-
BRCA2	32893329A>G	183A>G	L61=	synonymous codon	rs776638534	likely benign	VUS	-		Uncertain significance	likely benign	benign	controle
BRCA2	32893331TT>T	186del	F62fs	frameshift variant	rs398122733	pathogenic	PATHOGENIC	PVS1 | PS1 | PM2 | PP5	HRD deficient
BRCA2	32893341A>G	195A>G	P65=	synonymous codon	rs1131692135	likely benign	VUS	PM2
BRCA2	32893342C>T	196C>T	Q66*	stop gained	rs397507617	pathogenic	PATHOGENIC	PVS1 | PS1 | PM2 | PP5	HRD deficient
BRCA2	32893344A>G	198A>G	Q66=	synonymous codon	rs28897700	benign	LIKELY BENIGN	BS1 | BP6
BRCA2	32893348A>AGA	201_202dup	K68fs	frameshift variant	rs886040400	pathogenic	PATHOGENIC	PVS1 | PS1 | PM2 | PP5	HRD deficient
BRCA2	32893348AAACCATCTTATAATCA>A	203_218del	K68fs	frameshift variant	rs1064792960	pathogenic	PATHOGENIC	PVS1 | PS1 | PM2 | PP5	HRD deficient
BRCA2	32893349AA>A	204del	K68fs	frameshift variant	rs80359320	pathogenic	PATHOGENIC	PVS1 | PS1 | PM2 | PP5	HRD deficient
BRCA2	32893350A>AA	204dup	P69fs	frameshift variant	rs80359320	pathogenic	PATHOGENIC	PVS1 | PS1 | PM2 | PP5	HRD deficient
BRCA2	32893356T>C	210T>C	S70=	synonymous codon	rs751417001	likely benign	VUS	PM2
BRCA2	32893358A>AA	212dup	Y71*	stop gained	rs886040406	pathogenic	PATHOGENIC	PVS1 | PS1 | PM2 | PP5	HRD deficient
BRCA2	32893360AA>ATT	215delinsTT	N72fs	frameshift variant	rs397507619	pathogenic	PATHOGENIC	PVS1 | PS1 | PM2 | PP5	HRD deficient
BRCA2	32893363C>T	217C>T	Q73*	stop gained	rs398122741	pathogenic	PATHOGENIC	PVS1 | PS1 | PM2 | PP5	HRD deficient
BRCA2	32893366CT>C	221del	L74fs	frameshift variant	rs1064793061	pathogenic	PATHOGENIC	PVS1 | PS1 | PM2 | PP5	HRD deficient
BRCA2	32893368G>A	222G>A	L74=	synonymous codon	rs863224303	likely benign	VUS	PM2
BRCA2	32893368G>C	222G>C	L74=	synonymous codon	rs863224303	likely benign	VUS	PM2
BRCA2	32893369G>C	223G>C	A75P	missense	rs28897701	benign	LIKELY BENIGN	BS1 | BP1 | BP4 | BP6 | PS3	likely HRD proficient
BRCA2	32893369G>GA	223_224insA	A75fs	frameshift variant	rs1555280388	pathogenic	PATHOGENIC	PVS1 | PS1 | PM2 | PP5	HRD deficient
BRCA2	32893370C>CA	224_225insA	S76fs	frameshift variant	rs886040414	pathogenic	PATHOGENIC	PVS1 | PS1 | PM2 | PP5	HRD deficient
BRCA2	32893373C>G	227C>G	S76*	stop gained	rs80358498	pathogenic	PATHOGENIC	PVS1 | PS1 | PM2 | PP5	HRD deficient
BRCA2	32893377T>G	231T>G	T77=	synonymous codon	rs114446594	benign	BENIGN	BS1 | BS3 | BP6	neutral
BRCA2	32893389C>T	243C>T	F81=	synonymous codon	rs1131692144	likely benign	VUS	PM2
BRCA2	32893390A>T	244A>T	K82*	stop gained	rs397507628	pathogenic	PATHOGENIC	PVS1 | PS1 | PM2 | PP5	HRD deficient
BRCA2	32893391AA>A	246del	E83fs	frameshift variant	rs397507630	pathogenic	PATHOGENIC	PVS1 | PS1 | PM2 | PP5	HRD deficient
BRCA2	32893391AAG>A	248_249del	E83fs	frameshift variant	rs886040429	pathogenic	PATHOGENIC	PVS1 | PS1 | PM2 | PP5	HRD deficient
BRCA2	32893392A>AA	246dup	E83fs	frameshift variant	rs397507630	pathogenic	PATHOGENIC	PVS1 | PS1 | PM2 | PP5	HRD deficient
BRCA2	32893393G>T	247G>T	E83*	stop gained	rs886040428	pathogenic	PATHOGENIC	PVS1 | PS1 | PM2 | PP5	HRD deficient
BRCA2	32893395GC>G	250del	Q84fs	frameshift variant	rs886040432	pathogenic	PATHOGENIC	PVS1 | PS1 | PM2 | PP5	HRD deficient
BRCA2	32893396C>T	250C>T	Q84*	stop gained	rs80358515	pathogenic	PATHOGENIC	PVS1 | PS1 | PM2 | PP5	HRD deficient
BRCA2	32893405ACT>A	262_263del	L88fs	frameshift variant	rs276174825	pathogenic	PATHOGENIC	PVS1 | PS1 | PM2 | PP5	HRD deficient
BRCA2	32893408CT>C	263del	L88fs	frameshift variant	rs80359339	pathogenic	PATHOGENIC	PVS1 | PS1 | PM2 | PP5	HRD deficient
BRCA2	32893411CC>C	266del	P89fs	frameshift variant	rs80359341	pathogenic	PATHOGENIC	PVS1 | PS1 | PM2 | PP5	HRD deficient
BRCA2	32893412CGC>C	267_268del	L90fs	frameshift variant	rs1064795043	pathogenic	PATHOGENIC	PVS1 | PS1 | PM2 | PP5	HRD deficient
BRCA2	32893413G>A	267G>A	P89=	synonymous codon	rs587780648	likely benign	VUS	-					#REF!
BRCA2	32893413G>T	267G>T	P89=	synonymous codon	rs587780648	likely benign	LIKELY BENIGN	BS1					#REF!
BRCA2	32893416GTA>G	271_272del	Y91fs	frameshift variant	rs886040441	pathogenic	PATHOGENIC	PVS1 | PS1 | PM2 | PP5	HRD deficient
BRCA2	32893419C>A	273C>A	Y91*	stop gained	rs145988146	pathogenic	PATHOGENIC	PVS1 | PS1 | PM2 | PP5	HRD deficient
BRCA2	32893419C>G	273C>G	Y91*	stop gained	rs145988146	pathogenic	PATHOGENIC	PVS1 | PS1 | PM2 | PP5	HRD deficient
BRCA2	32893419C>T	273C>T	Y91=	synonymous codon	rs145988146	likely benign	LIKELY BENIGN	BS1		#REF!			#REF!
BRCA2	32893420C>T	274C>T	Q92*	stop gained	rs80358529	pathogenic	PATHOGENIC	PVS1 | PS1 | PM2 | PP5	HRD deficient
BRCA2	32893421A>ACCAT	275_276insCCAT	Q92fs	frameshift variant	rs1555280427	pathogenic	PATHOGENIC	PVS1 | PS1 | PM2 | PP5	HRD deficient
BRCA2	32893422A>AA	276dup	S93fs	frameshift variant	rs80359345	pathogenic	PATHOGENIC	PVS1 | PS1 | PM2 | PP5	HRD deficient
BRCA2	32893422A>G	276A>G	Q92=	synonymous codon	rs771101539	likely benign	VUS	PM2
BRCA2	32893434A>G	288A>G	K96=	synonymous codon	rs1131692133	likely benign	VUS	PM2
BRCA2	32893435G>T	289G>T	E97*	stop gained	rs397507646	pathogenic	PATHOGENIC	PVS1 | PS1 | PM2 | PP5	HRD deficient
BRCA2	32893439T>G	293T>G	L98*	stop gained	rs1085308035	pathogenic	PATHOGENIC	PVS1 | PS1 | PM2 | PP5	HRD deficient
BRCA2	32893444A>T	298A>T	K100*	stop gained	rs80358546	pathogenic	PATHOGENIC	PVS1 | PS1 | PM2 | PP5	HRD deficient
BRCA2	32893449C>T	303C>T	F101=	synonymous codon	rs397507301	likely benign	VUS	PM2
BRCA2	32893452A>AA	306dup	L103fs	frameshift variant	rs397507654	pathogenic	PATHOGENIC	PVS1 | PS1 | PM2 | PP5	HRD deficient
BRCA2	32893460T>G	314T>G	L105*	stop gained	rs80358561	pathogenic	PATHOGENIC	PVS1 | PS1 | PM2 | PP5 | BP4	HRD deficient
BRCA2	32893570A>G	316+108A>G		intron variant	rs115376548	benign	BENIGN	BA1 | BP6	neutral
BRCA2	32893724G>A	316+262G>A		intron variant	rs117573552	benign	BENIGN	BA1 | BP6	neutral
BRCA2	32893775AAACTA>A	316+314_316+318del		intron variant	rs367590748	benign	BENIGN	BA1 | BP6	neutral
BRCA2	32893791A>G	316+329A>G		intron variant	rs9534174	benign	BENIGN	BA1 | BP6	neutral
BRCA2	32893823A>G	316+361A>G		intron variant	rs74044997	benign	BENIGN	BA1 | BP6	neutral
BRCA2	32893908A>G	316+446A>G		intron variant	rs74044998	benign	BENIGN	BA1 | BP6	neutral
BRCA2	32894322G>A	316+860G>A		intron variant	rs11571589	benign	BENIGN	BA1 | BP6	neutral
BRCA2	32894325A>C	316+863A>C		intron variant	rs555027263	benign	VUS	BP6 | PM2
BRCA2	32894484G>A	316+1022G>A		intron variant	rs11571590	benign	BENIGN	BA1 | BP6	neutral
BRCA2	32894738G>A	316+1276G>A		intron variant	rs11571591	benign	BENIGN	BA1 | BP6	neutral
BRCA2	32894805A>T	316+1343A>T		intron variant	rs141454495	benign	BENIGN	BA1 | BP6	neutral
BRCA2	32894865T>C	316+1403T>C		intron variant	rs11571592	benign	BENIGN	BA1 | BP6	neutral
BRCA2	32894944G>A	316+1482G>A		intron variant	rs191199339	benign	LIKELY BENIGN	BS1 | BP6
BRCA2	32894977C>T	316+1515C>T		intron variant	rs7981512	benign	BENIGN	BA1 | BP6	neutral
BRCA2	32895377G>C	316+1915G>C		intron variant	rs206123	benign	BENIGN	BA1 | BP6	neutral
BRCA2	32895381T>C	316+1919T>C		intron variant	rs11571593	benign	LIKELY BENIGN	BS1 | BP6
BRCA2	32895471T>A	316+2009T>A		intron variant	rs188221073	benign	BENIGN	BA1 | BP6	neutral
BRCA2	32895674C>T	316+2212C>T		intron variant	rs11571594	benign	BENIGN	BA1 | BP6	neutral
BRCA2	32895749G>C	316+2287G>C		intron variant	rs11571595	benign	BENIGN	BA1 | BP6	neutral
BRCA2	32896073T>C	316+2611T>C		intron variant	rs185295915	benign	LIKELY BENIGN	BS1 | BP6
BRCA2	32896289C>T	316+2827C>T		intron variant	rs11571596	benign	BENIGN	BA1 | BP6	neutral
BRCA2	32896676G>A	317-2537G>A		intron variant	rs11571597	benign	BENIGN	BA1 | BP6	neutral
BRCA2	32896722C>T	317-2491C>T		intron variant	rs11571598	benign	BENIGN	BA1 | BP6	neutral
BRCA2	32896846G>A	317-2367G>A		intron variant	rs206070	benign	BENIGN	BA1 | BP6	neutral
BRCA2	32897143A>G	317-2070A>G		intron variant	rs11571601	benign	BENIGN	BA1 | BP6	neutral
BRCA2	32897304TTT>T	317-1908_317-1907del		intron variant	rs200414858	benign	BENIGN	BA1 | BP6	neutral
BRCA2	32897338G>A	317-1875G>A		intron variant	rs55953893	benign	BENIGN	BA1 | BP6	neutral
BRCA2	32897438C>T	317-1775C>T		intron variant	rs563809655	benign	LIKELY BENIGN	BS1 | BP6
BRCA2	32897533G>A	317-1680G>A		intron variant	rs11571603	benign	BENIGN	BA1 | BP6	neutral
BRCA2	32897542G>A	317-1671G>A		intron variant	rs180863416	benign	BENIGN	BA1 | BP6	neutral
BRCA2	32897998A>T	317-1215A>T		intron variant	rs575762451	benign	LIKELY BENIGN	BS1 | BP6
BRCA2	32898238G>A	317-975G>A		intron variant	rs11571605	benign	BENIGN	BA1 | BP6	neutral
BRCA2	32898634G>A	317-579G>A		intron variant	rs115317108	benign	BENIGN	BA1 | BP6	neutral
BRCA2	32898830A>G	317-383A>G		intron variant	rs11571606	benign	BENIGN	BA1 | BP6	neutral
BRCA2	32898864A>G	317-349A>G		intron variant	rs11571607	benign	BENIGN	BA1 | BP6	neutral
BRCA2	32899220T>C	324T>C	N108=	synonymous codon	rs772010158	likely benign	LIKELY BENIGN	BS1		975	#REF!	15	#REF!
BRCA2	32899229T>C	333T>C	N111=	synonymous codon	rs869320790	likely benign	VUS	PM2
BRCA2	32899235A>G	339A>G	R113=	synonymous codon	rs786203060	likely benign	VUS	PM2
BRCA2	32899237ATA>A	342_343del	H114fs	frameshift variant	rs878853568	pathogenic	PATHOGENIC	PVS1 | PS1 | PM2 | PP5	HRD deficient
BRCA2	32899238T>TT	342dup	K115*	stop gained	rs1555280845	pathogenic	PATHOGENIC	PVS1 | PS1 | PM2 | PP5	HRD deficient
BRCA2	32899244TCT>T	349_350del	L117fs	frameshift variant	rs1064794115	pathogenic	PATHOGENIC	PVS1 | PS1 | PM2 | PP5	HRD deficient
BRCA2	32899259AA>A	364del	T122fs	frameshift variant	rs397507680	pathogenic	PATHOGENIC	PVS1 | PS1 | PM2 | PP5	HRD deficient
BRCA2	32899263AAAATG>A	368_372del	K123fs	frameshift variant	rs886040488	pathogenic	PATHOGENIC	PVS1 | PS1 | PM2 | PP5	HRD deficient
BRCA2	32899265AA>A	370del	M124fs	frameshift variant	rs397507681	pathogenic	PATHOGENIC	PVS1 | PS1 | PM2 | PP5	HRD deficient
BRCA2	32899265AATGGA>A	370_374del	M124fs	frameshift variant	rs886040490	pathogenic	PATHOGENIC	PVS1 | PS1 | PM2 | PP5	HRD deficient
BRCA2	32899274A>AA	378dup	A127fs	frameshift variant	rs879255321	pathogenic	PATHOGENIC	PVS1 | PS1 | PM2 | PP5	HRD deficient
BRCA2	32899274A>G	378A>G	Q126=	synonymous codon	rs786201593	likely benign	VUS	PM2
BRCA2	32899277A>G	381A>G	A127=	synonymous codon	rs786202707	likely benign	VUS	PM2
BRCA2	32899286TT>T	391del	S131fs	frameshift variant	rs397507318	pathogenic	PATHOGENIC	PVS1 | PS1 | PM2 | PP5	HRD deficient
BRCA2	32899289C>T	393C>T	S131=	synonymous codon	rs1131692136	likely benign	VUS	PM2
BRCA2	32899292T>A	396T>A	C132*	stop gained	rs397507320	pathogenic	PATHOGENIC	PVS1 | PS1 | PM2 | PP5	HRD deficient
BRCA2	32899295A>G	399A>G	P133=	synonymous codon	rs876660310	likely benign	VUS	PM2
BRCA2	32899302AA>A	407del	N136fs	frameshift variant	rs80359425	pathogenic	PATHOGENIC	PVS1 | PS1 | PM2 | PP5	HRD deficient
BRCA2	32899305TC>T	410del	S137fs	frameshift variant	rs80359427	pathogenic	PATHOGENIC	PVS1 | PS1 | PM2 | PP5	HRD deficient
BRCA2	32899308TGTCTT>T	413_417del	C138*	stop gained	rs876658850	pathogenic	PATHOGENIC	PVS1 | PS1 | PM2 | PP5	HRD deficient
BRCA2	32899314AG>A	419del	S140fs	frameshift variant	rs886038050	pathogenic	PATHOGENIC	PVS1 | PS1 | PM2 | PP5	HRD deficient
BRCA2	32899388A>C	425+67A>C		intron variant	rs11571610	benign	BENIGN	BA1 | BP6	neutral
BRCA2	32899444C>T	425+123C>T		intron variant	rs11571611	benign	BENIGN	BA1 | BP6	neutral
BRCA2	32899468G>T	425+147G>T		intron variant	rs4942423	benign	BENIGN	BA1 | BP6	neutral
BRCA2	32899555G>A	425+234G>A		intron variant	rs11571612	benign	BENIGN	BA1 | BP6	neutral
BRCA2	32899567G>C	425+246G>C		intron variant	rs11571613	benign	BENIGN	BA1 | BP6	neutral
BRCA2	32899597AAGTC>A	425+281_425+284del		intron variant	rs202006492	benign	BENIGN	BA1 | BP6	neutral
BRCA2	32899606C>T	425+285C>T		intron variant	rs114789602	benign	LIKELY BENIGN	BS1 | BP6
BRCA2	32899778C>T	425+457C>T		intron variant	rs11571614	benign	BENIGN	BA1 | BP6	neutral
BRCA2	32899824C>T	426-414C>T		intron variant	rs11571616	benign	BENIGN	BA1 | BP6	neutral
BRCA2	32899833A>G	426-405A>G		intron variant	rs11571617	benign	BENIGN	BA1 | BP6	neutral
BRCA2	32899838C>T	426-400C>T		intron variant	rs11571618	benign	BENIGN	BA1 | BP6	neutral
BRCA2	32899847T>G	426-391T>G		intron variant	rs186248762	benign	LIKELY BENIGN	BS1 | BP6
BRCA2	32899878C>T	426-360C>T		intron variant	rs206071	benign	BENIGN	BA1 | BP6	neutral
BRCA2	32899887T>C	426-351T>C		intron variant	rs11571619	benign	BENIGN	BA1 | BP6	neutral
BRCA2	32899899G>A	426-339G>A		intron variant	rs11571620	benign	BENIGN	BA1 | BP6	neutral
BRCA2	32899902T>C	426-336T>C		intron variant	rs11571621	benign	BENIGN	BA1 | BP6	neutral
BRCA2	32899977T>A	426-261T>A		intron variant	rs542917942	benign	LIKELY BENIGN	BS1 | BP6
BRCA2	32900006C>T	426-232C>T		intron variant	rs187438860	benign	BENIGN	BA1 | BP6	neutral
BRCA2	32900149T>C	426-89T>C		intron variant	rs3783265	benign	BENIGN	BA1 | BP6	neutral
BRCA2	32900240C>CC	428dup	V144fs	frameshift variant	rs886040519	pathogenic	PATHOGENIC	PVS1 | PS1 | PM2 | PP5	HRD deficient
BRCA2	32900240CT>C	429del	V144fs	frameshift variant	rs587781945	pathogenic	PATHOGENIC	PVS1 | PS1 | PM2 | PP5	HRD deficient
BRCA2	32900244TGTTCT>T	433_437del	V145fs	frameshift variant	rs886040523	pathogenic	PATHOGENIC	PVS1 | PS1 | PM2 | PP5	HRD deficient
BRCA2	32900248C>T	436C>T	L146=	synonymous codon	rs876658912	likely benign	VUS	PM2
BRCA2	32900249TA>T	438del	Q147fs	frameshift variant	rs397507716	pathogenic	PATHOGENIC	PVS1 | PS1 | PM2 | PP5	HRD deficient
BRCA2	32900250A>G	438A>G	L146=	synonymous codon	rs200942633	likely benign	VUS	-		66	184	#REF!	#REF!
BRCA2	32900251C>T	439C>T	Q147*	stop gained	rs397507717	pathogenic	PATHOGENIC	PVS1 | PS1 | PM2 | PP5	HRD deficient
BRCA2	32900252AA>A	441del	Q147fs	frameshift variant	rs886040529	pathogenic	PATHOGENIC	PVS1 | PS1 | PM2 | PP5	HRD deficient
BRCA2	32900253A>G	441A>G	Q147=	synonymous codon	rs80358676	likely benign	VUS	-		66	184	#REF!	#REF!
BRCA2	32900264T>TGT	451_452dup	T152*	stop gained	rs876659317	pathogenic	PATHOGENIC	PVS1 | PS1 | PM2 | PP5	HRD deficient
BRCA2	32900271A>C	459A>C	P153=	synonymous codon	rs786201631	likely benign	VUS	PM2
BRCA2	32900273AAA>A	462_463del	D156*	stop gained	rs80359459	pathogenic	PATHOGENIC	PVS1 | PS1 | PM2 | PP5	HRD deficient
BRCA2	32900275AGA>A	466_467del	D156*	stop gained	rs886040542	pathogenic	PATHOGENIC	PVS1 | PS1 | PM2 | PP5	HRD deficient
BRCA2	32900275AGAGAT>A	464_468del	R155fs	frameshift variant	rs397507735	pathogenic	PATHOGENIC	PVS1 | PS1 | PM2 | PP5	HRD deficient
BRCA2	32900277A>AT	465_466insT	D156*	stop gained	rs1555280954	pathogenic	PATHOGENIC	PVS1 | PS1 | PM2 | PP5	HRD deficient
BRCA2	32900280T>TT	468dup	K157*	stop gained	rs1555280955	pathogenic	PATHOGENIC	PVS1 | PS1 | PM2 | PP5	HRD deficient
BRCA2	32900280TAA>T	469_470del	K157fs	frameshift variant	rs397507739	pathogenic	PATHOGENIC	PVS1 | PS1 | PM2 | PP5	HRD deficient
BRCA2	32900281A>AT	469_470insT	K157fs	frameshift variant	rs886040543	pathogenic	PATHOGENIC	PVS1 | PS1 | PM2 | PP5	HRD deficient
BRCA2	32900281AA>A	470del	K157fs	frameshift variant	rs886040544	pathogenic	PATHOGENIC	PVS1 | PS1 | PM2 | PP5	HRD deficient
BRCA2	32900281AAGTCA>A	470_474del	K157fs	frameshift variant	rs80359463	pathogenic	PATHOGENIC	PVS1 | PS1 | PM2 | PP5	HRD deficient
BRCA2	32900282A>AA	470dup	S158fs	frameshift variant	rs886040544	pathogenic	PATHOGENIC	PVS1 | PS1 | PM2 | PP5	HRD deficient
BRCA2	32900282AG>A	471del	K157fs	frameshift variant	rs1060502395	pathogenic	PATHOGENIC	PVS1 | PS1 | PM2 | PP5	HRD deficient
BRCA2	32900283G>GA	471_472insA	S158fs	frameshift variant	rs886040546	pathogenic	PATHOGENIC	PVS1 | PS1 | PM2 | PP5	HRD deficient
BRCA2	32900285C>A	473C>A	S158*	stop gained	rs80358701	pathogenic	PATHOGENIC	PVS1 | PS1 | PM2 | PP5 | BP4	HRD deficient
BRCA2	32900288G>A	475+1G>A		splice donor variant	rs81002797	pathogenic	PATHOGENIC	PVS1 | PS3 | PM2 | PP3 | PP5	HRD deficient
BRCA2	32900377A>G	476-2A>G		splice acceptor variant	rs81002853	pathogenic	PATHOGENIC	PVS1 | PS3 | PM2 | PP3 | PP5	HRD deficient
BRCA2	32900388GG>G	486del	S163fs	frameshift variant	rs587780653	pathogenic	PATHOGENIC	PVS1 | PS1 | PM2 | PP5	HRD deficient
BRCA2	32900390AGT>A	488_489del	S163fs	frameshift variant	rs397507747	pathogenic	PATHOGENIC	PVS1 | PS1 | PM2 | PP5	HRD deficient
BRCA2	32900391G>GG	488dup	S163fs	frameshift variant	rs1555280989	pathogenic	PATHOGENIC	PVS1 | PS1 | PM2 | PP5	HRD deficient
BRCA2	32900392T>TG	489_490insG	L164fs	frameshift variant	rs120074205	pathogenic	PATHOGENIC	PVS1 | PS1 | PM2 | PP5	HRD deficient
BRCA2	32900394T>A	491T>A	L164*	stop gained	rs80358717	pathogenic	PATHOGENIC	PVS1 | PS1 | PM2 | PP5	HRD deficient
BRCA2	32900397TT>T	495del	H166fs	frameshift variant	rs1135401890	pathogenic	PATHOGENIC	PVS1 | PS1 | PM2 | PP5	HRD deficient
BRCA2	32900404A>C	501A>C	T167=	synonymous codon	rs750805758	likely benign	VUS	-
BRCA2	32900404A>G	501A>G	T167=	synonymous codon	rs750805758	likely benign	VUS	PM2
BRCA2	32900405C>A	502C>A	P168T	missense	rs80358726	benign	BENIGN	BS1 | BS3 | BP1 | BP4 | BP6	neutral
BRCA2	32900408AA>A	506del	K169fs	frameshift variant	rs886040563	pathogenic	PATHOGENIC	PVS1 | PS1 | PM2 | PP5	HRD deficient
BRCA2	32900415T>TT	512dup	K172fs	frameshift variant	rs398122793	pathogenic	PATHOGENIC	PVS1 | PS1 | PM2 | PP5	HRD deficient
BRCA2	32900418A>AC	515_516insC	K172fs	frameshift variant	rs1555281000	pathogenic	PATHOGENIC	PVS1 | PS1 | PM2 | PP5	HRD deficient
BRCA2	32900440A>T	516+21A>T		intron variant	rs11571622	benign	BENIGN	BA1 | BS3 | BP6	neutral
BRCA2	32900617C>T	517-19C>T		intron variant	rs11571623	benign	BENIGN	BA1 | BS3 | BP6	neutral
BRCA2	32900636GG>G	518del	G173fs	frameshift variant	rs80359492	pathogenic	PATHOGENIC	PVS1 | PS1 | PP5	HRD deficient
BRCA2	32900640GT>G	522del	Q175fs	frameshift variant	rs1060502465	pathogenic	PATHOGENIC	PVS1 | PS1 | PM2 | PP5	HRD deficient
BRCA2	32900642C>T	523C>T	Q175*	stop gained	rs750385844	pathogenic	PATHOGENIC	PVS1 | PS1 | PM2 | PP5	HRD deficient
BRCA2	32900653A>G	534A>G	K178=	synonymous codon	rs28897703	likely benign	VUS	BS3	neutral
BRCA2	32900654CAT>C	538_539del	I180fs	frameshift variant	rs80359510	pathogenic	PATHOGENIC	PVS1 | PS1 | PM2 | PP5	HRD deficient
BRCA2	32900659TT>T	541del	S181fs	frameshift variant	rs276174857	pathogenic	PATHOGENIC	PVS1 | PS1 | PM2 | PP5	HRD deficient
BRCA2	32900668T>C	549T>C	S183=	synonymous codon	rs80359792	likely benign	VUS	BS3 | PM2	neutral
BRCA2	32900669C>T	550C>T	L184=	synonymous codon	rs749053313	likely benign	VUS	PM2
BRCA2	32900684G>GG	565dup	D189fs	frameshift variant	rs1555281066	pathogenic	PATHOGENIC	PVS1 | PS1 | PM2 | PP5	HRD deficient
BRCA2	32900685A>AG	566_567insG	D189fs	frameshift variant	rs886040603	pathogenic	PATHOGENIC	PVS1 | PS1 | PM2 | PP5	HRD deficient
BRCA2	32900686TCCTGATAT>T	568_575del	P190fs	frameshift variant	rs886040605	pathogenic	PATHOGENIC	PVS1 | PS1 | PM2 | PP5	HRD deficient
BRCA2	32900687C>CAACG	568_569insAACG	P190fs	frameshift variant	rs1555281068	pathogenic	PATHOGENIC	PVS1 | PS1 | PM2 | PP5	HRD deficient
BRCA2	32900688C>CAACG	569_570insAACG	D191fs	frameshift variant	rs886040606	pathogenic	PATHOGENIC	PVS1 | PS1 | PM2 | PP5	HRD deficient
BRCA2	32900690GA>GCT	572delinsCT	D191fs	frameshift variant	rs397507799	pathogenic	PATHOGENIC	PVS1 | PS1 | PM2 | PP5	HRD deficient
BRCA2	32900690GAT>G	574_575del	M192fs	frameshift variant	rs80359533	pathogenic	PATHOGENIC	PVS1 | PS1 | PM2 | PP5	HRD deficient
BRCA2	32900693A>AA	574dup	M192fs	frameshift variant	rs397507802	pathogenic	PATHOGENIC	PVS1 | PS1 | PM2 | PP5	HRD deficient
BRCA2	32900700G>A	581G>A	W194*	stop gained	rs80358809	pathogenic	PATHOGENIC	PVS1 | PS1 | PM2 | PP5	HRD deficient
BRCA2	32900701G>A	582G>A	W194*	stop gained	rs80358810	pathogenic	PATHOGENIC	PVS1 | PS1 | PM2 | PP5	HRD deficient
BRCA2	32900701GT>G	583del	S195fs	frameshift variant	rs886040615	pathogenic	PATHOGENIC	PVS1 | PS1 | PM2 | PP5	HRD deficient
BRCA2	32900703C>G	584C>G	S195*	stop gained	rs886038053	pathogenic	PATHOGENIC	PVS1 | PS1 | PM2 | PP5	HRD deficient
BRCA2	32900707T>C	588T>C	S196=	synonymous codon	rs876660795	likely benign	VUS	PM2
BRCA2	32900711TTAGC>TAGG	593_596delinsAGG	L198*	stop gained	rs786202156	pathogenic	PATHOGENIC	PVS1 | PM2 | PP5	HRD deficient
BRCA2	32900713AGCTA>A	595_598del	A199fs	frameshift variant	rs886040622	pathogenic	PATHOGENIC	PVS1 | PS1 | PM2 | PP5	HRD deficient
BRCA2	32900717A>AAGCTA	594_598dup	T200fs	frameshift variant	rs886040620	pathogenic	PATHOGENIC	PVS1 | PS1 | PM2 | PP5	HRD deficient
BRCA2	32900718C>CGCTAC	595_599dup	P201fs	frameshift variant	rs397507816	pathogenic	PATHOGENIC	PVS1 | PS1 | PM2 | PP5	HRD deficient
BRCA2	32900725C>T	606C>T	P202=	synonymous codon	rs747726394	likely benign	VUS	-
BRCA2	32900728CC>C	610del	S205fs	frameshift variant	rs80359560	pathogenic	PATHOGENIC	PVS1 | PS1 | PM2 | PP5	HRD deficient
BRCA2	32900731T>TTGAG	612_613insTGAG	S205*	stop gained	rs1555281102	pathogenic	PATHOGENIC	PVS1 | PS1 | PM2 | PP5	HRD deficient
BRCA2	32900732A>ACTTA	610_613dup	S205fs	frameshift variant	rs397507830	pathogenic	PATHOGENIC	PVS1 | PS1 | PM2 | PP5	HRD deficient
BRCA2	32900732A>ATGAG	613_614insTGAG	S205fs	frameshift variant	rs1555281101	pathogenic	PATHOGENIC	PVS1 | PS1 | PM2 | PP5	HRD deficient
BRCA2	32900732AG>A	614del	S205fs	frameshift variant	rs1555281103	pathogenic	PATHOGENIC	PVS1 | PS1 | PM2 | PP5	HRD deficient
BRCA2	32900746C>A	627C>A	L209=	synonymous codon	rs28897704	likely benign	VUS	BS3	neutral
BRCA2	32900746C>T	627C>T	L209=	synonymous codon	rs28897704	likely benign	BENIGN	BS1 | BS3	neutral
BRCA2	32900933T>A	631+183T>A		intron variant	rs3752451	benign	BENIGN	BA1 | BP6	neutral
BRCA2	32901291T>C	631+541T>C		intron variant	rs115974024	benign	BENIGN	BA1 | BP6	neutral
BRCA2	32901429A>AC	631+679_631+680insC		intron variant	rs199954794	benign	VUS	BP6 | PM2
BRCA2	32901430A>C	631+680A>C		intron variant	rs79990454	benign	BENIGN	BA1 | BP6	neutral
BRCA2	32901731C>T	631+981C>T		intron variant	rs189044716	benign	LIKELY BENIGN	BS1 | BP6
BRCA2	32901919T>TT	631+1169dup		intron variant	rs113733140	benign	BENIGN	BA1 | BP6	neutral
BRCA2	32902067A>G	631+1317A>G		intron variant	rs79347017	benign	BENIGN	BA1 | BP6	neutral
BRCA2	32902080T>C	631+1330T>C		intron variant	rs115548886	benign	BENIGN	BA1 | BP6	neutral
BRCA2	32902381C>T	632-1199C>T		intron variant	rs531627369	benign	VUS	BP6
BRCA2	32902394T>C	632-1186T>C		intron variant	rs12869544	benign	BENIGN	BA1 | BP6	neutral
BRCA2	32902447C>T	632-1133C>T		intron variant	rs183901354	benign	BENIGN	BA1 | BP6	neutral
BRCA2	32902777G>A	632-803G>A		intron variant	rs77534868	benign	BENIGN	BA1 | BP6	neutral
BRCA2	32902809A>T	632-771A>T		intron variant	rs113496137	benign	BENIGN	BA1 | BP6	neutral
BRCA2	32902901A>G	632-679A>G		intron variant	rs186147531	benign	BENIGN	BA1 | BP6	neutral
BRCA2	32903030T>TGT	632-551_632-550dup		intron variant	rs397843915	benign	BENIGN	BA1 | BP6	neutral
BRCA2	32903581C>T	633C>T	V211=	synonymous codon	rs768731187	likely benign	BENIGN	BS1 | BS3 | BP4	neutral
BRCA2	32903582AGA>A	635_636del	R212fs	frameshift variant	rs80359575	pathogenic	PATHOGENIC	PVS1 | PS1 | PM2 | PP5	HRD deficient
BRCA2	32903591G>T	643G>T	E215*	stop gained	rs774539540	pathogenic	PATHOGENIC	PVS1 | PS1 | PM2 | PP5	HRD deficient
BRCA2	32903600G>T	652G>T	E218*	stop gained	rs80358884	pathogenic	PATHOGENIC	PVS1 | PS1 | PM2 | PP5	HRD deficient
BRCA2	32903605TGT>T	658_659del	V220fs	frameshift variant	rs80359604	pathogenic	PATHOGENIC	PVS1 | PS1 | PP5	HRD deficient
BRCA2	32903609TTT>T	662_663del	F221fs	frameshift variant	rs80359609	pathogenic	PATHOGENIC	PVS1 | PS1 | PM2 | PP5	HRD deficient
BRCA2	32903611TCC>T	664_665del	P222fs	frameshift variant	rs886040671	pathogenic	PATHOGENIC	PVS1 | PS1 | PM2 | PP5	HRD deficient
BRCA2	32903615CA>C	668del	H223fs	frameshift variant	rs876659261	pathogenic	PATHOGENIC	PVS1 | PS1 | PM2 | PP5	HRD deficient
BRCA2	32903620TACTA>T	673_676del	T225fs	frameshift variant	rs397507880	pathogenic	PATHOGENIC	PVS1 | PS1 | PM2 | PP5	HRD deficient
BRCA2	32903621A>AGATA	670_673dup	T225fs	frameshift variant	rs730881601	pathogenic	PATHOGENIC	PVS1 | PS1 | PM2 | PP5	HRD deficient
BRCA2	32903621AC>A	674del	T225fs	frameshift variant	rs886038054	pathogenic	PATHOGENIC	PVS1 | PS1 | PM2 | PP5	HRD deficient
BRCA2	32903624AC>A	677del	T226fs	frameshift variant	rs886038055	pathogenic	PATHOGENIC	PVS1 | PS1 | PM2 | PP5	HRD deficient
BRCA2	32903685C>T	681+56C>T		intron variant	rs2126042	benign	BENIGN	BA1 | BP6	neutral
BRCA2	32903824T>G	681+195T>G		intron variant	rs11571625	benign	BENIGN	BA1 | BP6	neutral
BRCA2	32903838C>T	681+209C>T		intron variant	rs11571626	benign	BENIGN	BA1 | BP6	neutral
BRCA2	32903927T>A	681+298T>A		intron variant	rs11571628	benign	BENIGN	BA1 | BP6	neutral
BRCA2	32903955A>ATA	681+325_681+326dup		intron variant	rs397843916	benign	BENIGN	BA1 | BP6	neutral
BRCA2	32904299A>G	681+670A>G		intron variant	rs11571631	benign	BENIGN	BA1 | BP6	neutral
BRCA2	32904454C>T	682-602C>T		intron variant	rs11571634	benign	LIKELY BENIGN	BS1 | BP6
BRCA2	32904497G>A	682-559G>A		intron variant	rs144864139	benign	BENIGN	BA1 | BP6	neutral
BRCA2	32904740G>A	682-316G>A		intron variant	rs11571635	benign	BENIGN	BA1 | BP6	neutral
BRCA2	32904793G>GT	682-254dup		intron variant	rs200970975	benign	LIKELY BENIGN	BS1 | BP6
BRCA2	32905054A>G	682-2A>G		splice acceptor variant	rs878853287	pathogenic	PATHOGENIC	PVS1 | PS3 | PM2 | PP3 | PP5	HRD deficient
BRCA2	32905062A>T	688A>T	K230*	stop gained	rs80358913	pathogenic	PATHOGENIC	PVS1 | PS1 | PM2 | PP5	HRD deficient
BRCA2	32905068T>TT	694dup	Y232fs	frameshift variant	rs886040677	pathogenic	PATHOGENIC	PVS1 | PS1 | PM2 | PP5	HRD deficient
BRCA2	32905073TT>T	700del	S234fs	frameshift variant	rs80359630	pathogenic	PATHOGENIC	PVS1 | PS1 | PM2 | PP5	HRD deficient
BRCA2	32905075CC>C	702del	N235fs	frameshift variant	rs397507892	pathogenic	PATHOGENIC	PVS1 | PS1 | PM2 | PP5	HRD deficient
BRCA2	32905082T>C	708T>C	H236=	synonymous codon	rs185506536	likely benign	LIKELY BENIGN	BS1
BRCA2	32905086G>T	712G>T	E238*	stop gained	rs56383036	pathogenic	PATHOGENIC	PVS1 | PS1 | PM2 | PP5	HRD deficient
BRCA2	32905088AA>A	715del	S239fs	frameshift variant	rs431825350	pathogenic	PATHOGENIC	PVS1 | PS1 | PM2 | PP5	HRD deficient
BRCA2	32905089A>AA	715dup	S239fs	frameshift variant	rs431825350	pathogenic	PATHOGENIC	PVS1 | PS1 | PM2 | PP5	HRD deficient
BRCA2	32905095A>T	721A>T	K241*	stop gained	rs876659100	pathogenic	PATHOGENIC	PVS1 | PS1 | PM2 | PP5	HRD deficient
BRCA2	32905096AG>A	723del	N243fs	frameshift variant	rs886040694	pathogenic	PATHOGENIC	PVS1 | PS1 | PM2 | PP5	HRD deficient
BRCA2	32905102A>AA	728dup	N243fs	frameshift variant	rs886040697	pathogenic	PATHOGENIC	PVS1 | PS1 | PM2 | PP5	HRD deficient
BRCA2	32905102A>AC	728_729insC	D244*	stop gained	rs1555281462	pathogenic	PATHOGENIC	PVS1 | PS1 | PM2 | PP5	HRD deficient
BRCA2	32905102ATGAT>A	729_732del	N243fs	frameshift variant	rs80359645	pathogenic	PATHOGENIC	PVS1 | PS1 | PM2 | PP5	HRD deficient
BRCA2	32905103T>TC	729_730insC	D244fs	frameshift variant	rs1555281463	pathogenic	PATHOGENIC	PVS1 | PS1 | PM2 | PP5	HRD deficient
BRCA2	32905103T>TT	729dup	D244*	stop gained	rs886040698	pathogenic	PATHOGENIC	PVS1 | PS1 | PM2 | PP5	HRD deficient
BRCA2	32905106TA>T	733del	R245fs	frameshift variant	rs876658927	pathogenic	PATHOGENIC	PVS1 | PS1 | PM2 | PP5	HRD deficient
BRCA2	32905107A>T	733A>T	R245*	stop gained	rs80358959	pathogenic	PATHOGENIC	PVS1 | PS1 | PM2 | PP5	HRD deficient
BRCA2	32905109ATTTATCGCTTCTGTGACAGA>A	736_755del	F246fs	frameshift variant	rs886040701	pathogenic	PATHOGENIC	PVS1 | PS1 | PM2 | PP5	HRD deficient
BRCA2	32905112TAT>T	739_740del	I247fs	frameshift variant	rs886040705	pathogenic	PATHOGENIC	PVS1 | PS1 | PM2 | PP5	HRD deficient
BRCA2	32905113A>AAG	739_740insAG	I247fs	frameshift variant	rs1555281465	pathogenic	PATHOGENIC	PVS1 | PS1 | PM2 | PP5	HRD deficient
BRCA2	32905115C>T	741C>T	I247=	synonymous codon	rs276174892	likely benign	VUS	PM2
BRCA2	32905116GC>G	743del	A248fs	frameshift variant	rs886040708	pathogenic	PATHOGENIC	PVS1 | PS1 | PM2 | PP5	HRD deficient
BRCA2	32905118T>A	744T>A	A248=	synonymous codon	rs756883537	likely benign	VUS	PM2
BRCA2	32905118TTCTGTGACAGACA>T	745_757del	S249fs	frameshift variant	rs1555281467	pathogenic	PATHOGENIC	PVS1 | PS1 | PM2 | PP5	HRD deficient
BRCA2	32905121T>A	747T>A	S249=	synonymous codon	rs767165913	likely benign	LIKELY BENIGN	BS1
BRCA2	32905121TG>T	748del	V250*	stop gained	rs80359654	pathogenic	PATHOGENIC	PVS1 | PS1 | PM2 | PP5	HRD deficient
BRCA2	32905124G>A	750G>A	V250=	synonymous codon	rs143214959	likely benign	VUS	-
BRCA2	32905124GACAG>G	755_758del	D252fs	frameshift variant	rs80359659	pathogenic	PATHOGENIC	PVS1 | PS1 | PP5	HRD deficient
BRCA2	32905127AGA>A	754_755del	D252fs	frameshift variant	rs886038056	pathogenic	PATHOGENIC	PVS1 | PS1 | PM2 | PP5	HRD deficient
BRCA2	32905128GA>G	755del	D252fs	frameshift variant	rs80359661	pathogenic	PATHOGENIC	PVS1 | PS1 | PM2 | PP5	HRD deficient
BRCA2	32905129ACA>A	756_757del	D252fs	frameshift variant	rs80359662	pathogenic	PATHOGENIC	PVS1 | PS1 | PM2 | PP5	HRD deficient
BRCA2	32905129ACAGT>A	756_759del	D252fs	frameshift variant	rs80359663	pathogenic	PATHOGENIC	PVS1 | PS1 | PM2 | PP5	HRD deficient
BRCA2	32905130C>T	756C>T	D252=	synonymous codon	rs786202619	likely benign	VUS	PM2
BRCA2	32905130CAG>C	757_758del	S253*	stop gained	rs886040719	pathogenic	PATHOGENIC	PVS1 | PS1 | PM2 | PP5	HRD deficient
BRCA2	32905138ACA>A	765_770delinsAAACAAT	N255fs	frameshift variant	rs80359670	pathogenic	PATHOGENIC	PVS1 | PS1 | PM2 | PP5	HRD deficient
BRCA2	32905138ACACAAA>AAAACAAT	767_768del	T256fs	frameshift variant	rs886040725	pathogenic	PATHOGENIC	PVS1 | PS1 | PM2 | PP5	HRD deficient
BRCA2	32905140AC>A	767del	T256fs	frameshift variant	rs397507930	pathogenic	PATHOGENIC	PVS1 | PS1 | PM2 | PP5	HRD deficient
BRCA2	32905144ATCAAA>A	771_775del	N257fs	frameshift variant	rs80359671	pathogenic	PATHOGENIC	PVS1 | PS1 | PM2 | PP5	HRD deficient
BRCA2	32905146C>T	772C>T	Q258*	stop gained	rs80358998	pathogenic	PATHOGENIC	PVS1 | PS1 | PM2 | PP5	HRD deficient
BRCA2	32905147AAA>A	774_775del	E260fs	frameshift variant	rs75096777	pathogenic	PATHOGENIC	PVS1 | PS1 | PM2 | PP5	HRD deficient
BRCA2	32905147AAAGA>A	774_777del	R259fs	frameshift variant	rs1555281477	pathogenic	PATHOGENIC	PVS1 | PS1 | PM2 | PP5	HRD deficient
BRCA2	32905148A>G	774A>G	Q258=	synonymous codon	rs1131692112	likely benign	VUS	PM2
BRCA2	32905148AA>A	775del	R259fs	frameshift variant	rs75096777	pathogenic	PATHOGENIC	PVS1 | PS1 | PM2 | PP5	HRD deficient
BRCA2	32905149A>T	775A>T	R259*	stop gained	rs397507937	pathogenic	PATHOGENIC	PVS1 | PS1 | PM2 | PP5	HRD deficient
BRCA2	32905149AGA>A	778_779del	E260fs	frameshift variant	rs80359677	pathogenic	PATHOGENIC	PVS1 | PS1 | PM2 | PP5	HRD deficient
BRCA2	32905151A>G	777A>G	R259=	synonymous codon	rs431825356	likely benign	VUS	PM2
BRCA2	32905161A>AA	787dup	S263fs	frameshift variant	rs690016538	pathogenic	PATHOGENIC	PVS1 | PS1 | PM2 | PP5	HRD deficient
BRCA2	32905265G>A	793+98G>A		intron variant	rs206073	benign	BENIGN	BA1 | BP6	neutral
BRCA2	32905272C>T	793+105C>T		intron variant	rs139877528	benign	BENIGN	BA1 | BP6	neutral
BRCA2	32905568G>T	793+401G>T		intron variant	rs74865284	benign	BENIGN	BA1 | BP6	neutral
BRCA2	32905628C>A	793+461C>A		intron variant	rs11571638	benign	BENIGN	BA1 | BP6	neutral
BRCA2	32905915T>C	794-494T>C		intron variant	rs11571639	benign	BENIGN	BA1 | BP6	neutral
BRCA2	32905998A>G	794-411A>G		intron variant	rs11147486	benign	BENIGN	BA1 | BP6	neutral
BRCA2	32906237G>C	794-172G>C		intron variant	rs58259010	benign	BENIGN	BA1 | BP6	neutral
BRCA2	32906412TT>T	798del	F266fs	frameshift variant	rs886040739	pathogenic	PATHOGENIC	PVS1 | PS1 | PM2 | PP5	HRD deficient
BRCA2	32906414G>T	799G>T	G267*	stop gained	rs786202796	pathogenic	PATHOGENIC	PVS1 | PS1 | PM2 | PP5	HRD deficient
BRCA2	32906415G>GG	800dup	T269fs	frameshift variant	rs1555281594	pathogenic	PATHOGENIC	PVS1 | PS1 | PM2 | PP5	HRD deficient
BRCA2	32906420A>AA	805dup	T269fs	frameshift variant	rs886040744	pathogenic	PATHOGENIC	PVS1 | PS1 | PM2 | PP5	HRD deficient
BRCA2	32906422A>G	807A>G	T269=	synonymous codon	rs142072914	likely benign	VUS	PM2
BRCA2	32906424C>G	809C>G	S270*	stop gained	rs276174902	pathogenic	PATHOGENIC	PVS1 | PS1 | PM2 | PP5	HRD deficient
BRCA2	32906427GG>G	813del	N272fs	frameshift variant	rs1555281599	pathogenic	PATHOGENIC	PVS1 | PS1 | PM2 | PP5	HRD deficient
BRCA2	32906433C>A	818C>A	S273*	stop gained	rs80359068	pathogenic	PATHOGENIC	PVS1 | PS1 | PM2 | PP5	HRD deficient
BRCA2	32906433C>G	818C>G	S273*	stop gained	rs80359068	pathogenic	PATHOGENIC	PVS1 | PS1 | PM2 | PP5	HRD deficient
BRCA2	32906434A>G	819A>G	S273=	synonymous codon	rs786201605	likely benign	VUS	PM2
BRCA2	32906440AGTAAA>A	826_830del	V276*	stop gained	rs397507400	pathogenic	PATHOGENIC	PVS1 | PS1 | PM2 | PP5	HRD deficient
BRCA2	32906443A>G	828A>G	V276=	synonymous codon	rs771011424	likely benign	VUS	PM2
BRCA2	32906446T>TT	831dup	S278*	stop gained	rs886040759	pathogenic	PATHOGENIC	PVS1 | PS1 | PM2 | PP5	HRD deficient
BRCA2	32906447AG>A	833del	S278fs	frameshift variant	rs886038057	pathogenic	PATHOGENIC	PVS1 | PS1 | PM2 | PP5	HRD deficient
BRCA2	32906448GC>G	834del	C279fs	frameshift variant	rs876658861	pathogenic	PATHOGENIC	PVS1 | PS1 | PM2 | PP5	HRD deficient
BRCA2	32906456GAC>G	842_843del	D281fs	frameshift variant	rs886040773	pathogenic	PATHOGENIC	PVS1 | PS1 | PM2 | PP5	HRD deficient
BRCA2	32906458CCA>C	846_847del	I283fs	frameshift variant	rs886040776	pathogenic	PATHOGENIC	PVS1 | PS1 | PM2 | PP5	HRD deficient
BRCA2	32906472C>G	857C>G	S286*	stop gained	rs1131692035	pathogenic	PATHOGENIC	PVS1 | PS1 | PM2 | PP5	HRD deficient
BRCA2	32906475T>TCAAT	857_860dup	M287fs	frameshift variant	rs876660385	pathogenic	PATHOGENIC	PVS1 | PS1 | PM2 | PP5	HRD deficient
BRCA2	32906480A>C	865A>C	N289H	missense	rs766173	benign	BENIGN	BA1 | BS3 | BP1 | BP4 | BP6	neutral
BRCA2	32906482T>C	867T>C	N289=	synonymous codon	rs765832839	likely benign	VUS	PM2
BRCA2	32906495G>T	880G>T	E294*	stop gained	rs397508009	pathogenic	PATHOGENIC	PVS1 | PS1 | PM2 | PP5	HRD deficient
BRCA2	32906498GT>G	884del	V295fs	frameshift variant	rs886040795	pathogenic	PATHOGENIC	PVS1 | PS1 | PM2 | PP5	HRD deficient
BRCA2	32906503T>A	888T>A	Y296*	stop gained	rs876659359	pathogenic	PATHOGENIC	PVS1 | PS1 | PM2 | PP5	HRD deficient
BRCA2	32906504G>T	889G>T	E297*	stop gained	rs879255298	pathogenic	PATHOGENIC	PVS1 | PS1 | PM2 | PP5	HRD deficient
BRCA2	32906505AAACAGTTGT>AGATACTTCAG	891_899delinsGATACTTCAG	T298fs	frameshift variant	rs276174914	pathogenic	PATHOGENIC	PVS1 | PS1 | PM2 | PP5	HRD deficient
BRCA2	32906511T>TC	896_897insC	V300fs	frameshift variant	rs1555281622	pathogenic	PATHOGENIC	PVS1 | PS1 | PM2 | PP5	HRD deficient
BRCA2	32906512T>C	897T>C	V299=	synonymous codon	rs786203887	likely benign	VUS	PM2
BRCA2	32906512T>TC	897_898insC	V300fs	frameshift variant	rs80359735	pathogenic	PATHOGENIC	PVS1 | PS1 | PM2 | PP5	HRD deficient
BRCA2	32906512TGTA>TTT	898_900delinsTT	V300fs	frameshift variant	rs1060502385	pathogenic	PATHOGENIC	PVS1 | PS1 | PM2 | PP5	HRD deficient
BRCA2	32906516G>GG	901dup	D301fs	frameshift variant	rs80359738	pathogenic	PATHOGENIC	PVS1 | PS1 | PM2 | PP5	HRD deficient
BRCA2	32906519A>AA	904dup	T302fs	frameshift variant	rs1555281627	pathogenic	PATHOGENIC	PVS1 | PS1 | PM2 | PP5	HRD deficient
BRCA2	32906520C>CA	905_906insA	S303fs	frameshift variant	rs886040815	pathogenic	PATHOGENIC	PVS1 | PS1 | PM2 | PP5	HRD deficient
BRCA2	32906520CC>C	906del	S303fs	frameshift variant	rs397508033	pathogenic	PATHOGENIC	PVS1 | PS1 | PM2 | PP5	HRD deficient
BRCA2	32906524T>G	909T>G	S303=	synonymous codon	rs757430441	likely benign	VUS	-
BRCA2	32906528G>T	913G>T	E305*	stop gained	rs80359169	pathogenic	PATHOGENIC	PVS1 | PS1 | PM2 | PP5	HRD deficient
BRCA2	32906531GATAG>G	917_920del	D306fs	frameshift variant	rs1555281630	pathogenic	PATHOGENIC	PVS1 | PS1 | PM2 | PP5	HRD deficient
BRCA2	32906533T>C	918T>C	D306=	synonymous codon	rs184408918	likely benign	LIKELY BENIGN	BS1
BRCA2	32906533T>TT	918dup	S307*	stop gained	rs397508039	pathogenic	PATHOGENIC	PVS1 | PS1 | PM2 | PP5	HRD deficient
BRCA2	32906534A>AT	919_920insT	S307fs	frameshift variant	rs886040824	pathogenic	PATHOGENIC	PVS1 | PS1 | PM2 | PP5	HRD deficient
BRCA2	32906540T>TT	925dup	S309fs	frameshift variant	rs886038058	pathogenic	PATHOGENIC	PVS1 | PS1 | PM2 | PP5	HRD deficient
BRCA2	32906541C>A	926C>A	S309*	stop gained	rs886038059	pathogenic	PATHOGENIC	PVS1 | PS1 | PM2 | PP5	HRD deficient
BRCA2	32906541C>CC	926dup	L310fs	frameshift variant	rs1555281638	pathogenic	PATHOGENIC	PVS1 | PS1 | PM2 | PP5	HRD deficient
BRCA2	32906541C>G	926C>G	S309*	stop gained	rs886038059	pathogenic	PATHOGENIC	PVS1 | PS1 | PM2 | PP5	HRD deficient
BRCA2	32906541CA>C	927del	L310fs	frameshift variant	rs886040828	pathogenic	PATHOGENIC	PVS1 | PS1 | PM2 | PP5	HRD deficient
BRCA2	32906542A>G	927A>G	S309=	synonymous codon	rs80359806	likely benign	VUS	-
BRCA2	32906544TAT>T	930_931del	C311fs	frameshift variant	rs80359755	pathogenic	PATHOGENIC	PVS1 | PS1 | PM2 | PP5	HRD deficient
BRCA2	32906563AA>A	949del	T317fs	frameshift variant	rs886040843	pathogenic	PATHOGENIC	PVS1 | PS1 | PM2 | PP5	HRD deficient
BRCA2	32906567A>T	952A>T	K318*	stop gained	rs397508060	pathogenic	PATHOGENIC	PVS1 | PS1 | PM2 | PP5	HRD deficient
BRCA2	32906570AA>A	956del	N319fs	frameshift variant	rs80359770	pathogenic	PATHOGENIC	PVS1 | PS1 | PM2 | PP5	HRD deficient
BRCA2	32906571A>AA	956dup	N319fs	frameshift variant	rs80359770	pathogenic	PATHOGENIC	PVS1 | PS1 | PP5	HRD deficient
BRCA2	32906572T>C	957T>C	N319=	synonymous codon	rs776059220	likely benign	VUS	PM2
BRCA2	32906573CT>C	959del	L320fs	frameshift variant	rs1060502454	pathogenic	PATHOGENIC	PVS1 | PS1 | PM2 | PP5	HRD deficient
BRCA2	32906576C>T	961C>T	Q321*	stop gained	rs80359234	pathogenic	PATHOGENIC	PVS1 | PS1 | PM2 | PP5	HRD deficient
BRCA2	32906578A>G	963A>G	Q321=	synonymous codon	rs276174927	likely benign	VUS	-
BRCA2	32906582GTAAG>G	968_971del	V323fs	frameshift variant	rs886040847	pathogenic	PATHOGENIC	PVS1 | PS1 | PM2 | PP5	HRD deficient
BRCA2	32906584A>T	969A>T	V323=	synonymous codon	rs864622214	likely benign	VUS	PM2
BRCA2	32906584AAGAA>A	970_973del	R324fs	frameshift variant	rs886040848	pathogenic	PATHOGENIC	PVS1 | PS1 | PM2 | PP5	HRD deficient
BRCA2	32906593C>A	978C>A	S326R	missense	rs28897706	benign	BENIGN	BS1 | BS3 | BP1 | BP4 | BP6	neutral
BRCA2	32906594A>T	979A>T	K327*	stop gained	rs80359242	pathogenic	PATHOGENIC	PVS1 | PS1 | PM2 | PP5	HRD deficient
BRCA2	32906596G>A	981G>A	K327=	synonymous codon	rs751890878	likely benign	VUS	PM2
BRCA2	32906602G>A	987G>A	R329=	synonymous codon	rs561002197	benign	LIKELY BENIGN	BS1 | BP6
BRCA2	32906607AAA>A	993_994del	K331fs	frameshift variant	rs80359777	pathogenic	PATHOGENIC	PVS1 | PS1 | PM2 | PP5	HRD deficient
BRCA2	32906608AA>A	994del	I332fs	frameshift variant	rs80359777	pathogenic	PATHOGENIC	PVS1 | PS1 | PM2 | PP5	HRD deficient
BRCA2	32906609A>AA	994dup	I332fs	frameshift variant	rs80359777	pathogenic	PATHOGENIC	PVS1 | PS1 | PM2 | PP5	HRD deficient
BRCA2	32906609A>AAA	993_994dup	I332fs	frameshift variant	rs80359777	pathogenic	PATHOGENIC	PVS1 | PS1 | PM2 | PP5	HRD deficient
BRCA2	32906609A>AG	994_995insG	I332fs	frameshift variant	rs1555281681	pathogenic	PATHOGENIC	PVS1 | PS1 | PM2 | PP5	HRD deficient
BRCA2	32906610T>TA	995_996insA	H334fs	frameshift variant	rs276174931	pathogenic	PATHOGENIC	PVS1 | PS1 | PM2 | PP5	HRD deficient
BRCA2	32906610T>TG	995_996insG	I332fs	frameshift variant	rs276174931	pathogenic	PATHOGENIC	PVS1 | PS1 | PM2 | PP5	HRD deficient
BRCA2	32906613T>TT	998dup	H334fs	frameshift variant	rs397507437	pathogenic	PATHOGENIC	PVS1 | PS1 | PM2 | PP5	HRD deficient
BRCA2	32906620A>G	1005A>G	E335=	synonymous codon	rs28897707	likely benign	VUS	PM2
BRCA2	32906626C>T	1011C>T	N337=	synonymous codon	rs41293473	likely benign	LIKELY BENIGN	BS1
BRCA2	32906638T>A	1023T>A	C341*	stop gained	rs886040339	pathogenic	PATHOGENIC	PVS1 | PS1 | PM2 | PP5	HRD deficient
BRCA2	32906641A>G	1026A>G	E342=	synonymous codon	rs777755589	likely benign	VUS	PM2
BRCA2	32906643AA>A	1029del	K343fs	frameshift variant	rs80359260	pathogenic	PATHOGENIC	PVS1 | PS1 | PM2 | PP5	HRD deficient
BRCA2	32906647T>C	1032T>C	S344=	synonymous codon	rs746783617	likely benign	VUS	PM2
BRCA2	32906659G>A	1044G>A	V348=	synonymous codon	rs786201942	likely benign	VUS	PM2
BRCA2	32906668A>AA	1053dup	Y352fs	frameshift variant	rs886040342	pathogenic	PATHOGENIC	PVS1 | PS1 | PM2 | PP5	HRD deficient
BRCA2	32906669T>TT	1054dup	Y352fs	frameshift variant	rs80359261	pathogenic	PATHOGENIC	PVS1 | PS1 | PM2 | PP5	HRD deficient
BRCA2	32906670A>AA	1055dup	Y352*	stop gained	rs886038060	pathogenic	PATHOGENIC	PVS1 | PS1 | PM2 | PP5	HRD deficient
BRCA2	32906671C>T	1056C>T	Y352=	synonymous codon	rs786201858	likely benign	VUS	PM2
BRCA2	32906671CT>C	1057del	S353fs	frameshift variant	rs879255322	pathogenic	PATHOGENIC	PVS1 | PS1 | PM2 | PP5	HRD deficient
BRCA2	32906673C>A	1058C>A	S353*	stop gained	rs769368098	pathogenic	PATHOGENIC	PVS1 | PS1 | PM2 | PP5	HRD deficient
BRCA2	32906673C>G	1058C>G	S353*	stop gained	rs769368098	pathogenic	PATHOGENIC	PVS1 | PS1 | PM2 | PP5	HRD deficient
BRCA2	32906674A>G	1059A>G	S353=	synonymous codon	rs730881585	likely benign	VUS	-
BRCA2	32906683TG>T	1069del	E357fs	frameshift variant	rs886040343	pathogenic	PATHOGENIC	PVS1 | PS1 | PM2 | PP5	HRD deficient
BRCA2	32906689G>A	1074G>A	V358=	synonymous codon	rs276174805	likely benign	VUS	PM2
BRCA2	32906689G>T	1074G>T	V358=	synonymous codon	rs276174805	likely benign	VUS	PM2
BRCA2	32906696AA>A	1082del	N361fs	frameshift variant	rs397507569	pathogenic	PATHOGENIC	PVS1 | PS1 | PM2 | PP5	HRD deficient
BRCA2	32906707T>C	1092T>C	D364=	synonymous codon	rs876658640	likely benign	VUS	PM2
BRCA2	32906710A>T	1095A>T	P365=	synonymous codon	rs876660225	likely benign	VUS	PM2
BRCA2	32906712T>G	1097T>G	L366*	stop gained	rs886040345	pathogenic	PATHOGENIC	PVS1 | PS1 | PM2 | PP5	HRD deficient
BRCA2	32906712T>TT	1097dup	L366fs	frameshift variant	rs397507570	pathogenic	PATHOGENIC	PVS1 | PS1 | PM2 | PP5	HRD deficient
BRCA2	32906718C>A	1103C>A	S368*	stop gained	rs80358407	pathogenic	PATHOGENIC	PVS1 | PS1 | PM2 | PP5	HRD deficient
BRCA2	32906718C>G	1103C>G	S368*	stop gained	rs80358407	pathogenic	PATHOGENIC	PVS1 | PS1 | PM2 | PP5	HRD deficient
BRCA2	32906729A>C	1114A>C	N372H	missense	rs144848	benign	BENIGN	BA1 | BS3 | BP1 | BP4 | BP6	neutral
BRCA2	32906732C>T	1117C>T	Q373*	stop gained	rs397507572	pathogenic	PATHOGENIC	PVS1 | PS1 | PM2 | PP5	HRD deficient
BRCA2	32906738C>T	1123C>T	P375S	missense	rs80358408	benign	BENIGN	BS1 | BS3 | BP1 | BP4 | BP6	neutral
BRCA2	32906740C>A	1125C>A	P375=	synonymous codon	rs276174806	likely benign	VUS	PM2
BRCA2	32906740C>T	1125C>T	P375=	synonymous codon	rs276174806	likely benign	VUS	PM2
BRCA2	32906742TT>T	1128del	F376fs	frameshift variant	rs80359263	pathogenic	PATHOGENIC	PVS1 | PS1 | PM2 | PP5	HRD deficient
BRCA2	32906748GT>G	1134del	S378fs	frameshift variant	rs876658589	pathogenic	PATHOGENIC	PVS1 | PS1 | PM2 | PP5	HRD deficient
BRCA2	32906752AA>A	1138del	S380fs	frameshift variant	rs80359264	pathogenic	PATHOGENIC	PVS1 | PS1 | PM2 | PP5	HRD deficient
BRCA2	32906761AA>A	1147del	I383fs	frameshift variant	rs80359265	pathogenic	PATHOGENIC	PVS1 | PS1 | PM2 | PP5	HRD deficient
BRCA2	32906764C>A	1149C>A	I383=	synonymous codon	rs80359780	likely benign	VUS	PM2
BRCA2	32906766C>T	1151C>T	S384F	missense	rs41293475	benign	BENIGN	BS1 | BS3 | BP1 | BP4 | BP6	neutral
BRCA2	32906768A>T	1153A>T	K385*	stop gained	rs80358411	pathogenic	PATHOGENIC	PVS1 | PS1 | PM2 | PP5	HRD deficient
BRCA2	32906770GG>G	1156del	E386fs	frameshift variant	rs397507262	pathogenic	PATHOGENIC	PVS1 | PS1 | PM2 | PP5	HRD deficient
BRCA2	32906778TACCGT>T	1164_1168del	P389fs	frameshift variant	rs886038061	pathogenic	PATHOGENIC	PVS1 | PS1 | PM2 | PP5	HRD deficient
BRCA2	32906781C>CTACC	1163_1166dup	S390fs	frameshift variant	rs786202789	pathogenic	PATHOGENIC	PVS1 | PS1 | PM2 | PP5	HRD deficient
BRCA2	32906782G>A	1167G>A	P389=	synonymous codon	rs148607710	likely benign	LIKELY BENIGN	BS1
BRCA2	32906786T>C	1171T>C	L391=	synonymous codon	rs773412718	likely benign	VUS	PM2
BRCA2	32906790CCTGTG>C	1176_1180del	C393fs	frameshift variant	rs397507574	pathogenic	PATHOGENIC	PVS1 | PS1 | PM2 | PP5	HRD deficient
BRCA2	32906791C>T	1176C>T	A392=	synonymous codon	rs863224274	likely benign	VUS	PM2
BRCA2	32906794T>A	1179T>A	C393*	stop gained	rs786201237	pathogenic	PATHOGENIC	PVS1 | PS1 | PM2 | PP5	HRD deficient
BRCA2	32906794T>C	1179T>C	C393=	synonymous codon	rs786201237	likely benign	VUS	-
BRCA2	32906795G>T	1180G>T	E394*	stop gained	rs397507575	pathogenic	PATHOGENIC	PVS1 | PS1 | PM2 | PP5	HRD deficient
BRCA2	32906797A>G	1182A>G	E394=	synonymous codon	rs876658265	likely benign	VUS	PM2
BRCA2	32906799G>A	1184G>A	W395*	stop gained	rs886040347	pathogenic	PATHOGENIC	PVS1 | PS1 | PM2 | PP5	HRD deficient
BRCA2	32906800G>A	1185G>A	W395*	stop gained	rs886039315	pathogenic	PATHOGENIC	PVS1 | PS1 | PM2 | PP5	HRD deficient
BRCA2	32906801TCTCAACTAACCCTT>T	1187_1200del	S396fs	frameshift variant	rs886038062	pathogenic	PATHOGENIC	PVS1 | PS1 | PM2 | PP5	HRD deficient
BRCA2	32906803T>G	1188T>G	S396=	synonymous codon	rs80359781	likely benign	VUS	PM2
BRCA2	32906803T>TTTAG	1188_1189insTTAG	Q397fs	frameshift variant	rs1555281767	pathogenic	PATHOGENIC	PVS1 | PS1 | PM2 | PP5	HRD deficient
BRCA2	32906803T>TTTAT	1188_1189insTTAT	Q397fs	frameshift variant	rs1555281766	pathogenic	PATHOGENIC	PVS1 | PS1 | PM2 | PP5	HRD deficient
BRCA2	32906804C>CCAAC	1189_1190insCAAC	Q397fs	frameshift variant	rs1555281768	pathogenic	PATHOGENIC	PVS1 | PS1 | PM2 | PP5	HRD deficient
BRCA2	32906804C>CTTAG	1189_1190insTTAG	Q397fs	frameshift variant	rs397515635	pathogenic	PATHOGENIC	PVS1 | PS1 | PM2 | PP5	HRD deficient
BRCA2	32906804C>CTTAT	1189_1190insTTAT	Q397fs	frameshift variant	rs397515635	pathogenic	PATHOGENIC	PVS1 | PS1 | PM2 | PP5	HRD deficient
BRCA2	32906804C>T	1189C>T	Q397*	stop gained	rs760815829	pathogenic	PATHOGENIC	PVS1 | PS1 | PM2 | PP5	HRD deficient
BRCA2	32906805A>ATTAG	1190_1191insTTAG	Q397fs	frameshift variant	rs80359266	pathogenic	PATHOGENIC	PVS1 | PS1 | PM2 | PP5	HRD deficient
BRCA2	32906806AC>A	1192del	L398*	stop gained	rs1060502403	pathogenic	PATHOGENIC	PVS1 | PS1 | PM2 | PP5	HRD deficient
BRCA2	32906807C>CCAAC	1189_1192dup	L398fs	frameshift variant	rs1555281769	pathogenic	PATHOGENIC	PVS1 | PS1 | PM2 | PP5	HRD deficient
BRCA2	32906809AA>A	1195del	T399fs	frameshift variant	rs886040348	pathogenic	PATHOGENIC	PVS1 | PS1 | PM2 | PP5	HRD deficient
BRCA2	32906812C>G	1197C>G	T399=	synonymous codon	rs377308954	likely benign	VUS	-
BRCA2	32906817C>G	1202C>G	S401*	stop gained	rs80358413	pathogenic	PATHOGENIC	PVS1 | PS1 | PM2 | PP5	HRD deficient
BRCA2	32906819GG>G	1205del	G402fs	frameshift variant	rs397507265	pathogenic	PATHOGENIC	PVS1 | PS1 | PM2 | PP5	HRD deficient
BRCA2	32906826A>AA	1211dup	N404fs	frameshift variant	rs1555281775	pathogenic	PATHOGENIC	PVS1 | PS1 | PM2 | PP5	HRD deficient
BRCA2	32906826AT>A	1212del	N404fs	frameshift variant	rs886039504	pathogenic	PATHOGENIC	PVS1 | PS1 | PM2 | PP5	HRD deficient
BRCA2	32906833C>G	1218C>G	A406=	synonymous codon	rs276174807	likely benign	LIKELY BENIGN	BS1
BRCA2	32906833CC>C	1219del	Q407fs	frameshift variant	rs80359267	pathogenic	PATHOGENIC	PVS1 | PS1 | PM2 | PP5	HRD deficient
BRCA2	32906839GG>G	1225del	E409fs	frameshift variant	rs80359268	pathogenic	PATHOGENIC	PVS1 | PS1 | PM2 | PP5	HRD deficient
BRCA2	32906839GG>GTTT	1225delinsTTT	E409fs	frameshift variant	rs886040349	pathogenic	PATHOGENIC	PVS1 | PS1 | PM2 | PP5	HRD deficient
BRCA2	32906840GA>G	1226del	E409fs	frameshift variant	rs886038063	pathogenic	PATHOGENIC	PVS1 | PS1 | PM2 | PP5	HRD deficient
BRCA2	32906842G>A	1227G>A	E409=	synonymous codon	rs1131692145	likely benign	VUS	PM2
BRCA2	32906845AA>A	1231del	I411fs	frameshift variant	rs80359269	pathogenic	PATHOGENIC	PVS1 | PS1 | PM2 | PP5	HRD deficient
BRCA2	32906846ATACCCCTATTG>AACAT	1232_1242delinsACAT	I411fs	frameshift variant	rs886040350	pathogenic	PATHOGENIC	PVS1 | PS1 | PM2 | PP5	HRD deficient
BRCA2	32906848A>AA	1233dup	P412fs	frameshift variant	rs80359270	pathogenic	PATHOGENIC	PVS1 | PS1 | PM2 | PP5	HRD deficient
BRCA2	32906851C>T	1236C>T	P412=	synonymous codon	rs866473840	likely benign	VUS	PM2
BRCA2	32906851CC>C	1237del	L413fs	frameshift variant	rs886040351	pathogenic	PATHOGENIC	PVS1 | PS1 | PM2 | PP5	HRD deficient
BRCA2	32906852CT>C	1238del	L413fs	frameshift variant	rs80359271	pathogenic	PATHOGENIC	PVS1 | PS1 | PM2 | PP5	HRD deficient
BRCA2	32906856T>A	1241T>A	L414*	stop gained	rs397507576	pathogenic	PATHOGENIC	PVS1 | PS1 | PM2 | PP5	HRD deficient
BRCA2	32906863TT>T	1249del	S417fs	frameshift variant	rs886040352	pathogenic	PATHOGENIC	PVS1 | PS1 | PM2 | PP5	HRD deficient
BRCA2	32906868C>A	1253C>A	S418*	stop gained	rs397507266	pathogenic	PATHOGENIC	PVS1 | PS1 | PM2 | PP5	HRD deficient
BRCA2	32906868C>G	1253C>G	S418*	stop gained	rs397507266	pathogenic	PATHOGENIC	PVS1 | PS1 | PM2 | PP5	HRD deficient
BRCA2	32906871GT>G	1257del	C419fs	frameshift variant	rs80359272	pathogenic	PATHOGENIC	PVS1 | PS1 | PM2 | PP5	HRD deficient
BRCA2	32906875C>T	1260C>T	D420=	synonymous codon	rs779677234	likely benign	VUS	PM2
BRCA2	32906876C>T	1261C>T	Q421*	stop gained	rs80358419	pathogenic	PATHOGENIC	PVS1 | PS1 | PM2 | PP5	HRD deficient
BRCA2	32906879AA>A	1265del	N422fs	frameshift variant	rs80359273	pathogenic	PATHOGENIC	PVS1 | PS1 | PM2 | PP5	HRD deficient
BRCA2	32906887A>G	1272A>G	S424=	synonymous codon	rs587780531	likely benign	LIKELY BENIGN	BS1
BRCA2	32906890A>G	1275A>G	E425=	synonymous codon	rs34355306	benign	BENIGN	BA1 | BP6	neutral
BRCA2	32906892AA>A	1278del	D427fs	frameshift variant	rs80359274	pathogenic	PATHOGENIC	PVS1 | PS1 | PM2 | PP5	HRD deficient
BRCA2	32906899A>G	1284A>G	L428=	synonymous codon	rs34770647	likely benign	VUS	-
BRCA2	32906901T>G	1286T>G	L429*	stop gained	rs886040356	pathogenic	PATHOGENIC	PVS1 | PS1 | PM2 | PP5	HRD deficient
BRCA2	32906901T>TTT	1285_1286dup	L429fs	frameshift variant	rs886040355	pathogenic	PATHOGENIC	PVS1 | PS1 | PM2 | PP5	HRD deficient
BRCA2	32906902A>AA	1287dup	D430fs	frameshift variant	rs886040357	pathogenic	PATHOGENIC	PVS1 | PS1 | PM2 | PP5	HRD deficient
BRCA2	32906902A>G	1287A>G	L429=	synonymous codon	rs80359782	likely benign	LIKELY BENIGN	BS1
BRCA2	32906904ACA>A	1292_1293del	T431fs	frameshift variant	rs886038064	pathogenic	PATHOGENIC	PVS1 | PS1 | PM2 | PP5	HRD deficient
BRCA2	32906908A>G	1293A>G	T431=	synonymous codon	rs771350560	likely benign	VUS	PM2
BRCA2	32906908AGA>A	1296_1297del	N433fs	frameshift variant	rs80359276	pathogenic	PATHOGENIC	PVS1 | PS1 | PM2 | PP5	HRD deficient
BRCA2	32906913A>AA	1298dup	N433fs	frameshift variant	rs886040358	pathogenic	PATHOGENIC	PVS1 | PS1 | PM2 | PP5	HRD deficient
BRCA2	32906914CAAAA>C	1300_1303del	K434fs	frameshift variant	rs397507577	pathogenic	PATHOGENIC	PVS1 | PS1 | PM2 | PP5	HRD deficient
BRCA2	32906916AAAGA>A	1310_1313del	K437fs	frameshift variant	rs80359277	pathogenic	PATHOGENIC	PVS1 | PS1 | PM2 | PP5	HRD deficient
BRCA2	32906917A>G	1302A>G	K434=	synonymous codon	rs200552004	likely benign	VUS	PM2
BRCA2	32906920AAA>A	1306_1307del	K436fs	frameshift variant	rs80359278	pathogenic	PATHOGENIC	PVS1 | PS1 | PM2 | PP5	HRD deficient
BRCA2	32906921AA>A	1307del	K436fs	frameshift variant	rs80359278	pathogenic	PATHOGENIC	PVS1 | PS1 | PM2 | PP5	HRD deficient
BRCA2	32906922AGA>A	1308_1309del	K437fs	frameshift variant	rs786201950	pathogenic	PATHOGENIC	PVS1 | PS1 | PM2 | PP5	HRD deficient
BRCA2	32906924AAA>A	1310_1311del	K437fs	frameshift variant	rs397507578	pathogenic	PATHOGENIC	PVS1 | PS1 | PM2 | PP5	HRD deficient
BRCA2	32906925AAGAT>A	1311_1314del	K437fs	frameshift variant	rs886038065	pathogenic	PATHOGENIC	PVS1 | PS1 | PM2 | PP5	HRD deficient
BRCA2	32906931TT>T	1317del	T441fs	frameshift variant	rs886040359	pathogenic	PATHOGENIC	PVS1 | PS1 | PM2 | PP5	HRD deficient
BRCA2	32906934T>TCT	1318_1319dup	T441fs	frameshift variant	rs886040360	pathogenic	PATHOGENIC	PVS1 | PS1 | PM2 | PP5	HRD deficient
BRCA2	32906935TACTT>T	1321_1324del	T441fs	frameshift variant	rs1064793572	pathogenic	PATHOGENIC	PVS1 | PS1 | PM2 | PP5	HRD deficient
BRCA2	32906936A>AA	1321dup	T441fs	frameshift variant	rs80359281	pathogenic	PATHOGENIC	PVS1 | PS1 | PM2 | PP5	HRD deficient
BRCA2	32906940C>A	1325C>A	S442*	stop gained	rs80358421	pathogenic	PATHOGENIC	PVS1 | PS1 | PM2 | PP5	HRD deficient
BRCA2	32906940C>G	1325C>G	S442*	stop gained	rs80358421	pathogenic	PATHOGENIC	PVS1 | PS1 | PM2 | PP5	HRD deficient
BRCA2	32906941A>G	1326A>G	S442=	synonymous codon	rs752685860	likely benign	VUS	PM2
BRCA2	32906942G>T	1327G>T	E443*	stop gained	rs397507579	pathogenic	PATHOGENIC	PVS1 | PS1 | PM2 | PP5	HRD deficient
BRCA2	32906943AG>A	1329del	N444fs	frameshift variant	rs869320781	pathogenic	PATHOGENIC	PVS1 | PS1 | PM2 | PP5	HRD deficient
BRCA2	32906946ATT>A	1332_1333del	S445fs	frameshift variant	rs1135401892	pathogenic	PATHOGENIC	PVS1 | PS1 | PM2 | PP5	HRD deficient
BRCA2	32906948T>TT	1333dup	S445fs	frameshift variant	rs1555281841	pathogenic	PATHOGENIC	PVS1 | PS1 | PM2 | PP5	HRD deficient
BRCA2	32906948TC>T	1334del	S445fs	frameshift variant	rs886040361	pathogenic	PATHOGENIC	PVS1 | PS1 | PM2 | PP5	HRD deficient
BRCA2	32906949CTTTG>C	1335_1338del	L446fs	frameshift variant	rs397507580	pathogenic	PATHOGENIC	PVS1 | PS1 | PM2 | PP5	HRD deficient
BRCA2	32906951T>C	1336T>C	L446=	synonymous codon	rs761858047	likely benign	VUS	PM2
BRCA2	32906952T>A	1337T>A	L446*	stop gained	rs1555281845	pathogenic	PATHOGENIC	PVS1 | PS1 | PM2 | PP5	HRD deficient
BRCA2	32906962T>C	1347T>C	I449=	synonymous codon	rs755908353	likely benign	VUS	PM2
BRCA2	32906969C>A	1354C>A	L452I	missense	rs80358424	benign	LIKELY BENIGN	BP1 | BP4 | BP6 | PM2
BRCA2	32906969C>T	1354C>T	L452=	synonymous codon	rs80358424	likely benign	VUS	PM2
BRCA2	32906974A>T	1359A>T	P453=	synonymous codon	rs730881586	likely benign	VUS	PM2
BRCA2	32906976AA>A	1362del	K454fs	frameshift variant	rs80359282	pathogenic	PATHOGENIC	PVS1 | PS1 | PM2 | PP5	HRD deficient
BRCA2	32906977A>AA	1362dup	S455fs	frameshift variant	rs80359282	pathogenic	PATHOGENIC	PVS1 | PS1 | PM2 | PP5	HRD deficient
BRCA2	32906977A>G	1362A>G	K454=	synonymous codon	rs55919657	benign	LIKELY BENIGN	BS1 | BP6
BRCA2	32906980A>G	1365A>G	S455=	synonymous codon	rs1801439	benign	BENIGN	BA1 | BP6	neutral
BRCA2	32906980AGA>A	1368_1369del	K457fs	frameshift variant	rs397507583	pathogenic	PATHOGENIC	PVS1 | PS1 | PM2 | PP5	HRD deficient
BRCA2	32906983G>A	1368G>A	E456=	synonymous codon	rs747489126	benign	BENIGN	BA1 | BP6	neutral
BRCA2	32906986G>A	1371G>A	K457=	synonymous codon	rs786202479	likely benign	LIKELY BENIGN	BS1
BRCA2	32906990TT>T	1376del	L459*	stop gained	rs886040363	pathogenic	PATHOGENIC	PVS1 | PS1 | PM2 | PP5	HRD deficient
BRCA2	32906991T>G	1376T>G	L459*	stop gained	rs587781799	pathogenic	PATHOGENIC	PVS1 | PS1 | PM2 | PP5	HRD deficient
BRCA2	32906993AA>A	1379del	N460fs	frameshift variant	rs1064793945	pathogenic	PATHOGENIC	PVS1 | PS1 | PM2 | PP5	HRD deficient
BRCA2	32906996G>T	1381G>T	E461*	stop gained	rs587782159	pathogenic	PATHOGENIC	PVS1 | PS1 | PM2 | PP5	HRD deficient
BRCA2	32906998G>A	1383G>A	E461=	synonymous codon	rs864622199	likely benign	VUS	PM2
BRCA2	32907000A>G	1385A>G	E462G	missense	rs56403624	benign	BENIGN	BS1 | BS3 | BP1 | BP4 | BP6	neutral
BRCA2	32907003CA>C	1389del	V464fs	frameshift variant	rs397507584	pathogenic	PATHOGENIC	PVS1 | PS1 | PM2 | PP5	HRD deficient
BRCA2	32907003CAG>C	1389_1390del	V464fs	frameshift variant	rs80359283	pathogenic	PATHOGENIC	PVS1 | PS1 | PM2 | PP5	HRD deficient
BRCA2	32907006T>TT	1391dup	V465fs	frameshift variant	rs1555281888	pathogenic	PATHOGENIC	PVS1 | PS1 | PM2 | PP5	HRD deficient
BRCA2	32907007G>A	1392G>A	V464=	synonymous codon	rs1060504613	likely benign	VUS	-
BRCA2	32907010A>C	1395A>C	V465=	synonymous codon	rs11571641	likely benign	BENIGN	BS1 | BS3	neutral
BRCA2	32907010A>T	1395A>T	V465=	synonymous codon	rs11571641	likely benign	VUS	PM2
BRCA2	32907013TAAGA>T	1399_1402del	K467fs	frameshift variant	rs398122726	pathogenic	PATHOGENIC	PVS1 | PS1 | PM2 | PP5	HRD deficient
BRCA2	32907014A>T	1399A>T	K467*	stop gained	rs80358427	pathogenic	PATHOGENIC	PVS1 | PS1 | PM2 | PP5	HRD deficient
BRCA2	32907015AGA>A	1405_1406del	D469*	stop gained	rs397507586	pathogenic	PATHOGENIC	PVS1 | PS1 | PM2 | PP5	HRD deficient
BRCA2	32907016G>A	1401G>A	K467=	synonymous codon	rs276174808	likely benign	VUS	PM2
BRCA2	32907018GAGATGAAGAG>G	1404_1413del	R468fs	frameshift variant	rs886040364	pathogenic	PATHOGENIC	PVS1 | PS1 | PM2 | PP5	HRD deficient
BRCA2	32907023G>GG	1408dup	E470fs	frameshift variant	rs80359284	pathogenic	PATHOGENIC	PVS1 | PS1 | PM2 | PP5	HRD deficient
BRCA2	32907026G>T	1411G>T	E471*	stop gained	rs80358428	pathogenic	PATHOGENIC	PVS1 | PS1 | PM2 | PP5	HRD deficient
BRCA2	32907029C>T	1414C>T	Q472*	stop gained	rs80358429	pathogenic	PATHOGENIC	PVS1 | PS1 | PM2 | PP5	HRD deficient
BRCA2	32907031G>A	1416G>A	Q472=	synonymous codon	rs876659746	likely benign	VUS	PM2
BRCA2	32907038G>T	1423G>T	E475*	stop gained	rs397507587	pathogenic	PATHOGENIC	PVS1 | PS1 | PM2 | PP5	HRD deficient
BRCA2	32907042CTCAT>C	1428_1431del	H477fs	frameshift variant	rs587781804	pathogenic	PATHOGENIC	PVS1 | PS1 | PM2 | PP5	HRD deficient
BRCA2	32907043TC>T	1429del	H477fs	frameshift variant	rs1555281909	pathogenic	PATHOGENIC	PVS1 | PS1 | PM2 | PP5	HRD deficient
BRCA2	32907047ACA>A	1433_1434del	T478fs	frameshift variant	rs886040365	pathogenic	PATHOGENIC	PVS1 | PS1 | PM2 | PP5	HRD deficient
BRCA2	32907058TC>T	1444del	A483fs	frameshift variant	rs397507588	pathogenic	PATHOGENIC	PVS1 | PS1 | PM2 | PP5	HRD deficient
BRCA2	32907062G>GG	1447dup	A483fs	frameshift variant	rs587782611	pathogenic	PATHOGENIC	PVS1 | PS1 | PM2 | PP5	HRD deficient
BRCA2	32907063CAGT>CTTAC	1449_1451delinsTTAC	V484fs	frameshift variant	rs397507589	pathogenic	PATHOGENIC	PVS1 | PM2 | PP5	HRD deficient
BRCA2	32907063CAGT>CTTCC	1449_1451delinsTTCC	V484fs	frameshift variant	rs397507589	pathogenic	PATHOGENIC	PVS1 | PM2 | PP5	HRD deficient
BRCA2	32907066T>TCAGT	1448_1451dup	K485fs	frameshift variant	rs886040366	pathogenic	PATHOGENIC	PVS1 | PS1 | PM2 | PP5	HRD deficient
BRCA2	32907067A>G	1452A>G	V484=	synonymous codon	rs753601570	likely benign	LIKELY BENIGN	BS1
BRCA2	32907068AA>A	1454del	K485fs	frameshift variant	rs886040367	pathogenic	PATHOGENIC	PVS1 | PS1 | PM2 | PP5	HRD deficient
BRCA2	32907071C>T	1456C>T	Q486*	stop gained	rs80358434	pathogenic	PATHOGENIC	PVS1 | PS1 | PM2 | PP5	HRD deficient
BRCA2	32907096TGGCTT>T	1482_1486del	A495fs	frameshift variant	rs886040368	pathogenic	PATHOGENIC	PVS1 | PS1 | PM2 | PP5	HRD deficient
BRCA2	32907097G>A	1482G>A	V494=	synonymous codon	rs1060502387	likely benign	VUS	PM2
BRCA2	32907099C>CC	1484dup	S496fs	frameshift variant	rs886040369	pathogenic	PATHOGENIC	PVS1 | PS1 | PM2 | PP5	HRD deficient
BRCA2	32907110CAG>C	1496_1497del	Q499fs	frameshift variant	rs80359285	pathogenic	PATHOGENIC	PVS1 | PS1 | PM2 | PP5	HRD deficient
BRCA2	32907113GG>G	1499del	G500fs	frameshift variant	rs397507591	pathogenic	PATHOGENIC	PVS1 | PS1 | PM2 | PP5	HRD deficient
BRCA2	32907115T>G	1500T>G	G500=	synonymous codon	rs781722399	likely benign	VUS	PM2
BRCA2	32907118CAAAAAGTC>C	1504_1511del	K502fs	frameshift variant	rs886040370	pathogenic	PATHOGENIC	PVS1 | PS1 | PM2 | PP5	HRD deficient
BRCA2	32907121AAA>A	1507_1508del	K503fs	frameshift variant	rs886038066	pathogenic	PATHOGENIC	PVS1 | PS1 | PM2 | PP5	HRD deficient
BRCA2	32907122AA>A	1508del	K503fs	frameshift variant	rs886038066	pathogenic	PATHOGENIC	PVS1 | PS1 | PM2 | PP5	HRD deficient
BRCA2	32907125TCT>T	1511_1512del	S504fs	frameshift variant	rs80359286	pathogenic	PATHOGENIC	PVS1 | PS1 | PM2 | PP5	HRD deficient
BRCA2	32907128AT>A	1514del	I505fs	frameshift variant	rs397507592	pathogenic	PATHOGENIC	PVS1 | PS1 | PM2 | PP5	HRD deficient
BRCA2	32907140AGA>A	1528_1529del	E510fs	frameshift variant	rs886040372	pathogenic	PATHOGENIC	PVS1 | PS1 | PM2 | PP5	HRD deficient
BRCA2	32907143G>T	1528G>T	E510*	stop gained	rs80358438	pathogenic	PATHOGENIC	PVS1 | PS1 | PM2 | PP5	HRD deficient
BRCA2	32907147C>A	1532C>A	S511*	stop gained	rs1555281935	pathogenic	PATHOGENIC	PVS1 | PS1 | PM2 | PP5	HRD deficient
BRCA2	32907152AAAGA>A	1538_1541del	K513fs	frameshift variant	rs886040373	pathogenic	PATHOGENIC	PVS1 | PS1 | PM2 | PP5	HRD deficient
BRCA2	32907153A>G	1538A>G	K513R	missense	rs28897709	benign	LIKELY BENIGN	BS3 | BP1 | BP4 | BP6	neutral
BRCA2	32907154A>G	1539A>G	K513=	synonymous codon	rs557258016	likely benign	VUS	PM2
BRCA2	32907155G>GG	1540dup	E514fs	frameshift variant	rs397507593	pathogenic	PATHOGENIC	PVS1 | PS1 | PM2 | PP5	HRD deficient
BRCA2	32907157G>GG	1542dup	T515fs	frameshift variant	rs80359288	pathogenic	PATHOGENIC	PVS1 | PS1 | PM2 | PP5	HRD deficient
BRCA2	32907160T>C	1545T>C	T515=	synonymous codon	rs786202158	likely benign	VUS	PM2
BRCA2	32907161TT>T	1547del	F516fs	frameshift variant	rs80359289	pathogenic	PATHOGENIC	PVS1 | PS1 | PM2 | PP5	HRD deficient
BRCA2	32907162TC>T	1548del	F516fs	frameshift variant	rs1555281944	pathogenic	PATHOGENIC	PVS1 | PS1 | PM2 | PP5	HRD deficient
BRCA2	32907166T>C	1551T>C	N517=	synonymous codon	rs760647691	likely benign	VUS	PM2
BRCA2	32907166TG>T	1552del	A518fs	frameshift variant	rs786201986	pathogenic	PATHOGENIC	PVS1 | PS1 | PM2 | PP5	HRD deficient
BRCA2	32907169A>T	1554A>T	A518=	synonymous codon	rs786201487	likely benign	VUS	PM2
BRCA2	32907174TTT>T	1560_1561del	S521fs	frameshift variant	rs886040374	pathogenic	PATHOGENIC	PVS1 | PS1 | PM2 | PP5	HRD deficient
BRCA2	32907182CAT>C	1570_1571del	M524fs	frameshift variant	rs863224824	pathogenic	PATHOGENIC	PVS1 | PS1 | PM2 | PP5	HRD deficient
BRCA2	32907184T>C	1569T>C	H523=	synonymous codon	rs201750635	likely benign	VUS	PM2
BRCA2	32907186TG>T	1572del	M524fs	frameshift variant	rs397507594	pathogenic	PATHOGENIC	PVS1 | PS1 | PM2 | PP5	HRD deficient
BRCA2	32907193T>C	1578T>C	D526=	synonymous codon	rs752309823	likely benign	LIKELY BENIGN	BS1
BRCA2	32907199C>CA	1584_1585insA	F529fs	frameshift variant	rs1555281966	pathogenic	PATHOGENIC	PVS1 | PS1 | PM2 | PP5	HRD deficient
BRCA2	32907199C>T	1584C>T	N528=	synonymous codon	rs730881587	likely benign	VUS	-
BRCA2	32907201TT>TCA	1587delinsCA	E532fs	frameshift variant	rs886040376	pathogenic	PATHOGENIC	PVS1 | PS1 | PM2 | PP5	HRD deficient
BRCA2	32907201TTAAA>T	1587_1590del	F529fs	frameshift variant	rs886040375	pathogenic	PATHOGENIC	PVS1 | PS1 | PM2 | PP5	HRD deficient
BRCA2	32907203A>T	1588A>T	K530*	stop gained	rs879255325	pathogenic	PATHOGENIC	PVS1 | PS1 | PM2 | PP5	HRD deficient
BRCA2	32907208A>AA	1593dup	E532fs	frameshift variant	rs397507272	pathogenic	PATHOGENIC	PVS1 | PS1 | PM2 | PP5	HRD deficient
BRCA2	32907208AGA>A	1594_1595del	E532fs	frameshift variant	rs886040377	pathogenic	PATHOGENIC	PVS1 | PS1 | PM2 | PP5	HRD deficient
BRCA2	32907209G>T	1594G>T	E532*	stop gained	rs138734772	pathogenic	PATHOGENIC	PVS1 | PS1 | PM2 | PP5	HRD deficient
BRCA2	32907209GAAACT>G	1595_1599del	E532fs	frameshift variant	rs80359291	pathogenic	PATHOGENIC	PVS1 | PS1 | PM2 | PP5	HRD deficient
BRCA2	32907210AAA>A	1596_1597del	E532fs	frameshift variant	rs80359292	pathogenic	PATHOGENIC	PVS1 | PS1 | PM2 | PP5	HRD deficient
BRCA2	32907211AA>A	1597del	T533fs	frameshift variant	rs80359292	pathogenic	PATHOGENIC	PVS1 | PS1 | PM2 | PP5	HRD deficient
BRCA2	32907213CTG>C	1599_1600del	E534fs	frameshift variant	rs80359293	pathogenic	PATHOGENIC	PVS1 | PS1 | PM2 | PP5	HRD deficient
BRCA2	32907214T>C	1599T>C	T533=	synonymous codon	rs80359783	likely benign	VUS	PM2
BRCA2	32907223T>TT	1608dup	E537*	stop gained	rs276174811	pathogenic	PATHOGENIC	PVS1 | PS1 | PM2 | PP5	HRD deficient
BRCA2	32907226AAG>A	1612_1613del	S538fs	frameshift variant	rs397507597	pathogenic	PATHOGENIC	PVS1 | PS1 | PM2 | PP5	HRD deficient
BRCA2	32907231GA>G	1617del	L540fs	frameshift variant	rs80359294	pathogenic	PATHOGENIC	PVS1 | PS1 | PM2 | PP5	HRD deficient
BRCA2	32907232A>G	1617A>G	G539=	synonymous codon	rs1131692142	likely benign	VUS	PM2
BRCA2	32907236G>T	1621G>T	E541*	stop gained	rs886040378	pathogenic	PATHOGENIC	PVS1 | PS1 | PM2 | PP5	HRD deficient
BRCA2	32907245ACT>A	1631_1632del	T544fs	frameshift variant	rs80359295	pathogenic	PATHOGENIC	PVS1 | PS1 | PM2 | PP5	HRD deficient
BRCA2	32907250TT>T	1636del	C546fs	frameshift variant	rs397507598	pathogenic	PATHOGENIC	PVS1 | PS1 | PM2 | PP5	HRD deficient
BRCA2	32907256A>G	1641A>G	S547=	synonymous codon	rs786203659	likely benign	VUS	PM2
BRCA2	32907257C>T	1642C>T	Q548*	stop gained	rs398122729	pathogenic	PATHOGENIC	PVS1 | PS1 | PM2 | PP5	HRD deficient
BRCA2	32907259G>A	1644G>A	Q548=	synonymous codon	rs55986646	benign	LIKELY BENIGN	BS1 | BP6
BRCA2	32907260AAGGA>A	1646_1649del	K549fs	frameshift variant	rs397507599	pathogenic	PATHOGENIC	PVS1 | PS1 | PM2 | PP5	HRD deficient
BRCA2	32907262G>A	1647G>A	K549=	synonymous codon	rs276174812	likely benign	LIKELY BENIGN	BS1
BRCA2	32907263G>GG	1648dup	E550fs	frameshift variant	rs80359296	pathogenic	PATHOGENIC	PVS1 | PS1 | PM2 | PP5	HRD deficient
BRCA2	32907268CT>C	1654del	S552fs	frameshift variant	rs80359297	pathogenic	PATHOGENIC	PVS1 | PS1 | PM2 | PP5	HRD deficient
BRCA2	32907273T>G	1658T>G	L553*	stop gained	rs876659627	pathogenic	PATHOGENIC	PVS1 | PS1 | PM2 | PP5	HRD deficient
BRCA2	32907274A>G	1659A>G	L553=	synonymous codon	rs786201343	likely benign	VUS	-
BRCA2	32907277T>G	1662T>G	C554W	missense	rs80358451	benign	BENIGN	BS1 | BS3 | BP1 | BP4 | BP6	neutral
BRCA2	32907280A>C	1665A>C	P555=	synonymous codon	rs1131692127	likely benign	VUS	PM2
BRCA2	32907281AA>A	1667del	N556fs	frameshift variant	rs879255437	pathogenic	PATHOGENIC	PVS1 | PS1 | PM2 | PP5	HRD deficient
BRCA2	32907282ATTTA>AATT	1668_1671delinsATT	N556fs	frameshift variant	rs483353110	pathogenic	PATHOGENIC	PVS1 | PS1 | PM2 | PP5	HRD deficient
BRCA2	32907284TTAATTGATAATGGA>T	1670_1683del	L557*	stop gained	rs397507600	pathogenic	PATHOGENIC	PVS1 | PS1 | PM2 | PP5	HRD deficient
BRCA2	32907285T>G	1670T>G	L557*	stop gained	rs80358452	pathogenic	PATHOGENIC	PVS1 | PS1 | PM2 | PP5	HRD deficient
BRCA2	32907285TAATT>T	1671_1674del	D559fs	frameshift variant	rs886040379	pathogenic	PATHOGENIC	PVS1 | PS1 | PM2 | PP5	HRD deficient
BRCA2	32907286AA>A	1672del	I558fs	frameshift variant	rs397507601	pathogenic	PATHOGENIC	PVS1 | PS1 | PM2 | PP5	HRD deficient
BRCA2	32907288TTGATAAT>T	1674_1680del	I558fs	frameshift variant	rs886040380	pathogenic	PATHOGENIC	PVS1 | PS1 | PM2 | PP5	HRD deficient
BRCA2	32907289TG>T	1675del	D559fs	frameshift variant	rs886040381	pathogenic	PATHOGENIC	PVS1 | PS1 | PM2 | PP5	HRD deficient
BRCA2	32907296G>T	1681G>T	G561*	stop gained	rs80358455	pathogenic	PATHOGENIC	PVS1 | PS1 | PM2 | PP5	HRD deficient
BRCA2	32907303GG>G	1689del	W563fs	frameshift variant	rs876659278	pathogenic	PATHOGENIC	PVS1 | PS1 | PM2 | PP5	HRD deficient
BRCA2	32907303GGCCA>G	1693_1696del	A565fs	frameshift variant	rs886040382	pathogenic	PATHOGENIC	PVS1 | PS1 | PM2 | PP5	HRD deficient
BRCA2	32907304G>A	1689G>A	W563*	stop gained	rs80358456	pathogenic	PATHOGENIC	PVS1 | PS1 | PM2 | PP5	HRD deficient
BRCA2	32907310CA>C	1696del	T566fs	frameshift variant	rs1555282016	pathogenic	PATHOGENIC	PVS1 | PS1 | PM2 | PP5	HRD deficient
BRCA2	32907315CCA>C	1705_1706del	Q569fs	frameshift variant	rs886040383	pathogenic	PATHOGENIC	PVS1 | PS1 | PM2 | PP5	HRD deficient
BRCA2	32907318C>CG	1703_1704insG	Q569fs	frameshift variant	rs1555282023	pathogenic	PATHOGENIC	PVS1 | PS1 | PM2 | PP5	HRD deficient
BRCA2	32907319A>AG	1704_1705insG	Q569fs	frameshift variant	rs886038067	pathogenic	PATHOGENIC	PVS1 | PS1 | PM2 | PP5	HRD deficient
BRCA2	32907319AC>A	1705del	Q569fs	frameshift variant	rs80359300	pathogenic	PATHOGENIC	PVS1 | PS1 | PM2 | PP5	HRD deficient
BRCA2	32907321AGA>A	1707_1708del	N570fs	frameshift variant	rs886040384	pathogenic	PATHOGENIC	PVS1 | PS1 | PM2 | PP5	HRD deficient
BRCA2	32907325TTCTGT>T	1711_1715del	V572fs	frameshift variant	rs397507602	pathogenic	PATHOGENIC	PVS1 | PS1 | PM2 | PP5	HRD deficient
BRCA2	32907347GG>G	1733del	G578fs	frameshift variant	rs879255326	pathogenic	PATHOGENIC	PVS1 | PS1 | PM2 | PP5	HRD deficient
BRCA2	32907353ATATCCACTTTGAAAAA>A	1739_1754del	I580fs	frameshift variant	rs886040385	pathogenic	PATHOGENIC	PVS1 | PS1 | PM2 | PP5	HRD deficient
BRCA2	32907358C>T	1743C>T	S581=	synonymous codon	rs1057520248	likely benign	VUS	PM2
BRCA2	32907359A>C	1744A>C	T582P	missense	rs80358457	benign	LIKELY BENIGN	BS1 | BP1 | BP4 | BP6 | PS3	likely HRD proficient
BRCA2	32907362TT>T	1748del	L583*	stop gained	rs397507605	pathogenic	PATHOGENIC	PVS1 | PS1 | PM2 | PP5	HRD deficient
BRCA2	32907363T>A	1748T>A	L583*	stop gained	rs397507604	pathogenic	PATHOGENIC	PVS1 | PS1 | PM2 | PP5	HRD deficient
BRCA2	32907364G>A	1749G>A	L583=	synonymous codon	rs780324598	likely benign	LIKELY BENIGN	BS1
BRCA2	32907368AA>A	1754del	K585fs	frameshift variant	rs80359301	pathogenic	PATHOGENIC	PVS1 | PS1 | PM2 | PP5	HRD deficient
BRCA2	32907369AGAAAA>A	1755_1759del	K585fs	frameshift variant	rs80359302	pathogenic	PATHOGENIC	PVS1 | PS1 | PM2 | PP5	HRD deficient
BRCA2	32907371A>T	1756A>T	K586*	stop gained	rs397507275	pathogenic	PATHOGENIC	PVS1 | PS1 | PM2 | PP5	HRD deficient
BRCA2	32907374AC>A	1760del	T587fs	frameshift variant	rs1555282054	pathogenic	PATHOGENIC	PVS1 | PS1 | PM2 | PP5	HRD deficient
BRCA2	32907376AAATAA>A	1762_1766del	N588fs	frameshift variant	rs80359303	pathogenic	PATHOGENIC	PVS1 | PS1 | PM2 | PP5	HRD deficient
BRCA2	32907377AATAA>A	1763_1766del	N588fs	frameshift variant	rs80359303	pathogenic	PATHOGENIC	PVS1 | PS1 | PM2 | PP5	HRD deficient
BRCA2	32907379TAA>T	1765_1766del	K589fs	frameshift variant	rs397507606	pathogenic	PATHOGENIC	PVS1 | PS1 | PM2 | PP5	HRD deficient
BRCA2	32907383TTTAT>T	1773_1776del	I591fs	frameshift variant	rs80359304	pathogenic	PATHOGENIC	PVS1 | PS1 | PM2 | PP5	HRD deficient
BRCA2	32907388TTATG>T	1774_1777del	Y592fs	frameshift variant	rs886040387	pathogenic	PATHOGENIC	PVS1 | PS1 | PM2 | PP5	HRD deficient
BRCA2	32907391T>C	1776T>C	Y592=	synonymous codon	rs876658706	likely benign	VUS	PM2
BRCA2	32907401GATGAAACATCTTA>G	1787_1799del	D596fs	frameshift variant	rs886040388	pathogenic	PATHOGENIC	PVS1 | PS1 | PM2 | PP5	HRD deficient
BRCA2	32907403T>C	1788T>C	D596=	synonymous codon	rs11571642	benign	BENIGN	BA1 | BS3 | BP6	neutral
BRCA2	32907404G>T	1789G>T	E597*	stop gained	rs80358461	pathogenic	PATHOGENIC	PVS1 | PS1 | PM2 | PP5	HRD deficient
BRCA2	32907406AA>A	1792del	T598fs	frameshift variant	rs886040389	pathogenic	PATHOGENIC	PVS1 | PS1 | PM2 | PP5	HRD deficient
BRCA2	32907407A>AA	1792dup	T598fs	frameshift variant	rs886040389	pathogenic	PATHOGENIC	PVS1 | PS1 | PM2 | PP5	HRD deficient
BRCA2	32907410TCTTAT>T	1796_1800del	S599*	stop gained	rs276174813	pathogenic	PATHOGENIC	PVS1 | PS1 | PM2 | PP5	HRD deficient
BRCA2	32907411CTTATA>C	1797_1801del	Y600fs	frameshift variant	rs397507607	pathogenic	PATHOGENIC	PVS1 | PS1 | PM2 | PP5	HRD deficient
BRCA2	32907412TTA>T	1800_1801del	Y600*	stop gained	rs1135401894	pathogenic	PATHOGENIC	PVS1 | PS1 | PM2 | PP5	HRD deficient
BRCA2	32907412TTATAA>T	1798_1802del	Y600fs	frameshift variant	rs886040390	pathogenic	PATHOGENIC	PVS1 | PS1 | PM2 | PP5	HRD deficient
BRCA2	32907415T>A	1800T>A	Y600*	stop gained	rs80358464	pathogenic	PATHOGENIC	PVS1 | PS1 | PM2 | PP5	HRD deficient
BRCA2	32907415T>C	1800T>C	Y600=	synonymous codon	rs80358464	likely benign	VUS	PM2
BRCA2	32907415T>G	1800T>G	Y600*	stop gained	rs80358464	pathogenic	PATHOGENIC	PVS1 | PS1 | PM2 | PP5	HRD deficient
BRCA2	32907419G>A	1804G>A	G602R	missense	rs80358466	benign	LIKELY BENIGN	BS3 | BP1 | BP4 | BP6	neutral
BRCA2	32907419GG>G	1805del	G602fs	frameshift variant	rs397507608	pathogenic	PATHOGENIC	PVS1 | PS1 | PM2 | PP5	HRD deficient
BRCA2	32907421A>G	1806A>G	G602=	synonymous codon	rs876658692	likely benign	VUS	PM2
BRCA2	32907425AAA>AG	1811_1812delinsG	K604fs	frameshift variant	rs886040391	pathogenic	PATHOGENIC	PVS1 | PS1 | PM2 | PP5	HRD deficient
BRCA2	32907427A>AC	1812_1813insC	I605fs	frameshift variant	rs1555282094	pathogenic	PATHOGENIC	PVS1 | PS1 | PM2 | PP5	HRD deficient
BRCA2	32907427AA>A	1813del	I605fs	frameshift variant	rs80359306	pathogenic	PATHOGENIC	PVS1 | PS1 | PM2 | PP5	HRD deficient
BRCA2	32907428A>AA	1813dup	I605fs	frameshift variant	rs80359306	pathogenic	PATHOGENIC	PVS1 | PS1 | PP5	HRD deficient
BRCA2	32907430A>AA	1815dup	P606fs	frameshift variant	rs80359310	pathogenic	PATHOGENIC	PVS1 | PS1 | PM2 | PP5	HRD deficient
BRCA2	32907433G>A	1818G>A	P606=	synonymous codon	rs76844014	likely benign	LIKELY BENIGN	BS1
BRCA2	32907434A>T	1819A>T	K607*	stop gained	rs80358471	pathogenic	PATHOGENIC	PVS1 | PS1 | PM2 | PP5	HRD deficient
BRCA2	32907436A>AA	1821dup	D608fs	frameshift variant	rs879255327	pathogenic	PATHOGENIC	PVS1 | PS1 | PM2 | PP5	HRD deficient
BRCA2	32907440C>T	1825C>T	Q609*	stop gained	rs80358472	pathogenic	PATHOGENIC	PVS1 | PS1 | PM2 | PP5	HRD deficient
BRCA2	32907445AT>A	1831del	S611fs	frameshift variant	rs80359311	pathogenic	PATHOGENIC	PVS1 | PS1 | PM2 | PP5	HRD deficient
BRCA2	32907445ATCAGAACTAATT>AATCAG	1831_1842delinsATCAG	S611fs	frameshift variant	rs1064793898	pathogenic	PATHOGENIC	PVS1 | PS1 | PM2 | PP5	HRD deficient
BRCA2	32907447C>A	1832C>A	S611*	stop gained	rs80358474	pathogenic	PATHOGENIC	PVS1 | PS1 | PM2 | PP5	HRD deficient
BRCA2	32907447C>G	1832C>G	S611*	stop gained	rs80358474	pathogenic	PATHOGENIC	PVS1 | PS1 | PM2 | PP5	HRD deficient
BRCA2	32907447CA>C	1833del	E612fs	frameshift variant	rs1064796073	pathogenic	PATHOGENIC	PVS1 | PS1 | PM2 | PP5	HRD deficient
BRCA2	32907455ATTAA>A	1841_1844del	I614fs	frameshift variant	rs886040392	pathogenic	PATHOGENIC	PVS1 | PS1 | PM2 | PP5	HRD deficient
BRCA2	32907457T>TT	1842dup	N615*	stop gained	rs80359312	pathogenic	PATHOGENIC	PVS1 | PS1 | PM2 | PP5	HRD deficient
BRCA2	32907459ACT>A	1845_1846del	N615fs	frameshift variant	rs886040393	pathogenic	PATHOGENIC	PVS1 | PS1 | PM2 | PP5	HRD deficient
BRCA2	32907465C>A	1850C>A	S617*	stop gained	rs397507278	pathogenic	PATHOGENIC	PVS1 | PS1 | PM2 | PP5	HRD deficient
BRCA2	32907465C>G	1850C>G	S617*	stop gained	rs397507278	pathogenic	PATHOGENIC	PVS1 | PS1 | PM2 | PP5	HRD deficient
BRCA2	32907466A>AA	1851dup	A618fs	frameshift variant	rs397507610	pathogenic	PATHOGENIC	PVS1 | PS1 | PM2 | PP5	HRD deficient
BRCA2	32907466A>C	1851A>C	S617=	synonymous codon	rs876658518	likely benign	VUS	PM2
BRCA2	32907466A>G	1851A>G	S617=	synonymous codon	rs876658518	likely benign	VUS	PM2
BRCA2	32907468C>CA	1853_1854insA	Q619fs	frameshift variant	rs1555282128	pathogenic	PATHOGENIC	PVS1 | PS1 | PM2 | PP5	HRD deficient
BRCA2	32907468CC>CAA	1854delinsAA	Q619fs	frameshift variant	rs276174815	pathogenic	PATHOGENIC	PVS1 | PS1 | PM2 | PP5	HRD deficient
BRCA2	32907469C>CA	1854_1855insA	Q619fs	frameshift variant	rs80359313	pathogenic	PATHOGENIC	PVS1 | PS1 | PM2 | PP5	HRD deficient
BRCA2	32907469CC>C	1855del	Q619fs	frameshift variant	rs397507611	pathogenic	PATHOGENIC	PVS1 | PS1 | PM2 | PP5	HRD deficient
BRCA2	32907470C>CC	1855dup	Q619fs	frameshift variant	rs397507611	pathogenic	PATHOGENIC	PVS1 | PS1 | PM2 | PP5	HRD deficient
BRCA2	32907470C>T	1855C>T	Q619*	stop gained	rs80358476	pathogenic	PATHOGENIC	PVS1 | PS1 | PM2 | PP5	HRD deficient
BRCA2	32907495CA>C	1881del	P628fs	frameshift variant	rs397507612	pathogenic	PATHOGENIC	PVS1 | PS1 | PM2 | PP5	HRD deficient
BRCA2	32907501TTACATTT>T	1887_1893del	T630fs	frameshift variant	rs1555282146	pathogenic	PATHOGENIC	PVS1 | PS1 | PM2 | PP5	HRD deficient
BRCA2	32907502TA>T	1888del	T630fs	frameshift variant	rs886040394	pathogenic	PATHOGENIC	PVS1 | PS1 | PM2 | PP5	HRD deficient
BRCA2	32907503A>AA	1888dup	T630fs	frameshift variant	rs80359314	pathogenic	PATHOGENIC	PVS1 | PS1 | PM2 | PP5	HRD deficient
BRCA2	32907503A>AAA	1888_1889insAA	T630fs	frameshift variant	rs80359314	pathogenic	PATHOGENIC	PVS1 | PS1 | PM2 | PP5	HRD deficient
BRCA2	32907503AC>A	1889del	T630fs	frameshift variant	rs80359315	pathogenic	PATHOGENIC	PVS1 | PS1 | PM2 | PP5	HRD deficient
BRCA2	32907504C>T	1889C>T	T630I	missense	rs80358479	benign	BENIGN	BS1 | BS3 | BP1 | BP4 | BP6	neutral
BRCA2	32907505A>ACA	1889_1890dup	F631fs	frameshift variant	rs1555282148	pathogenic	PATHOGENIC	PVS1 | PS1 | PM2 | PP5	HRD deficient
BRCA2	32907514T>TTT	1899_1900insTT	A634fs	frameshift variant	rs397507613	pathogenic	PATHOGENIC	PVS1 | PS1 | PM2 | PP5	HRD deficient
BRCA2	32907515G>GTT	1900_1901insTT	A634fs	frameshift variant	rs886040395	pathogenic	PATHOGENIC	PVS1 | PS1 | PM2 | PP5	HRD deficient
BRCA2	32907515GC>G	1901del	A634fs	frameshift variant	rs397507614	pathogenic	PATHOGENIC	PVS1 | PS1 | PM2 | PP5	HRD deficient
BRCA2	32907519ATTCAG>A	1905_1909del	D635fs	frameshift variant	rs1555282156	pathogenic	PATHOGENIC	PVS1 | PS1 | PM2 | PP5	HRD deficient
BRCA2	32907520TT>T	1906del	S636fs	frameshift variant	rs878853298	pathogenic	PATHOGENIC	PVS1 | PS1 | PM2 | PP5	HRD deficient
BRCA2	32907522C>G	1907C>G	S636*	stop gained	rs431825288	pathogenic	PATHOGENIC	PVS1 | PS1 | PM2 | PP3 | PP5	HRD deficient
BRCA2	32907595T>C	1909+71T>C		intron variant	rs375176572	benign	LIKELY BENIGN	BS1 | BP6
BRCA2	32907615ATATCT>A	1909+95_1909+99del		intron variant	rs144549870	benign	BENIGN	BA1 | BP6	neutral
BRCA2	32907767C>T	1909+243C>T		intron variant	rs11571643	benign	BENIGN	BA1 | BP6	neutral
BRCA2	32907856A>G	1909+332A>G		intron variant	rs11571644	benign	BENIGN	BA1 | BP6	neutral
BRCA2	32907913C>T	1909+389C>T		intron variant	rs145137109	benign	LIKELY BENIGN	BS1 | BP6
BRCA2	32908106A>G	1909+582A>G		intron variant	rs206074	benign	BENIGN	BA1 | BP6	neutral
BRCA2	32908347C>T	1909+823C>T		intron variant	rs1963505	benign	BENIGN	BA1 | BP6	neutral
BRCA2	32908629A>G	1909+1105A>G		intron variant	rs1029304	benign	BENIGN	BA1 | BP6	neutral
BRCA2	32908724T>C	1909+1200T>C		intron variant	rs190338696	benign	LIKELY BENIGN	BS1 | BP6
BRCA2	32908824AG>A	1909+1301del		intron variant	rs202150453	benign	VUS	PM2 | BP6
BRCA2	32909277TCAAG>T	1910-1124_1910-1121del		intron variant	rs11571647	benign	BENIGN	BA1 | BP6	neutral
BRCA2	32909450C>T	1910-952C>T		intron variant	rs11571648	benign	BENIGN	BA1 | BP6	neutral
BRCA2	32909615G>C	1910-787G>C		intron variant	rs79662804	benign	BENIGN	BA1 | BP6	neutral
BRCA2	32909860T>C	1910-542T>C		intron variant	rs150391946	benign	LIKELY BENIGN	BS1 | BP6
BRCA2	32909881C>A	1910-521C>A		intron variant	rs556019160	benign	BENIGN	BA1 | BP6	neutral
BRCA2	32909965GA>G	1910-436del		intron variant	rs11571649	benign	BENIGN	BA1 | BP6	neutral
BRCA2	32910056T>G	1910-346T>G		intron variant	rs11571650	benign	BENIGN	BA1 | BP6	neutral
BRCA2	32910102T>C	1910-300T>C		intron variant	rs78579727	benign	BENIGN	BA1 | BP6	neutral
BRCA2	32910328T>C	1910-74T>C		intron variant	rs2320236	benign	BENIGN	BA1 | BP6	neutral
BRCA2	32910351G>T	1910-51G>T		intron variant	rs11571651	benign	BENIGN	BA1 | BS3 | BP6	neutral
BRCA2	32910359T>C	1910-43T>C		intron variant	rs116486565	benign	BENIGN	BA1 | BP6	neutral
BRCA2	32910403T>C	1911T>C	G637=	synonymous codon	rs11571652	benign	LIKELY BENIGN	BS1 | BP4 | BP6
BRCA2	32910403T>G	1911T>G	G637=	synonymous codon	rs11571652	likely benign	VUS	PM2 | BP4
BRCA2	32910405T>G	1913T>G	L638*	stop gained	rs886040396	pathogenic	PATHOGENIC	PVS1 | PS1 | PM2 | PP5	HRD deficient
BRCA2	32910409G>A	1917G>A	L639=	synonymous codon	rs779226644	likely benign	LIKELY BENIGN	BS1
BRCA2	32910414C>CAT	1922_1923insAT	S642fs	frameshift variant	rs1555282353	pathogenic	PATHOGENIC	PVS1 | PS1 | PM2 | PP5	HRD deficient
BRCA2	32910415T>TAT	1923_1924insAT	S642fs	frameshift variant	rs886040397	pathogenic	PATHOGENIC	PVS1 | PS1 | PM2 | PP5	HRD deficient
BRCA2	32910420TG>T	1929del	R645fs	frameshift variant	rs80359316	pathogenic	PATHOGENIC	PVS1 | PS1 | PM2 | PP5	HRD deficient
BRCA2	32910424AA>A	1933del	R645fs	frameshift variant	rs397507616	pathogenic	PATHOGENIC	PVS1 | PS1 | PM2 | PP5	HRD deficient
BRCA2	32910430C>T	1938C>T	S646=	synonymous codon	rs28897711	benign	LIKELY BENIGN	BS1 | BP6
BRCA2	32910434TC>T	1943del	S648fs	frameshift variant	rs876658660	pathogenic	PATHOGENIC	PVS1 | PS1 | PM2 | PP5	HRD deficient
BRCA2	32910435C>G	1943C>G	S648*	stop gained	rs886040398	pathogenic	PATHOGENIC	PVS1 | PS1 | PM2 | PP5	HRD deficient
BRCA2	32910437C>T	1945C>T	Q649*	stop gained	rs398122735	pathogenic	PATHOGENIC	PVS1 | PS1 | PM2 | PP5	HRD deficient
BRCA2	32910451A>G	1959A>G	E653=	synonymous codon	rs276174817	likely benign	VUS	PM2
BRCA2	32910452G>T	1960G>T	E654*	stop gained	rs786203845	pathogenic	PATHOGENIC	PVS1 | PS1 | PM2 | PP5	HRD deficient
BRCA2	32910455CC>C	1964del	P655fs	frameshift variant	rs1555282375	pathogenic	PATHOGENIC	PVS1 | PS1 | PM2 | PP5	HRD deficient
BRCA2	32910456C>G	1964C>G	P655R	missense	rs28897712	benign	LIKELY BENIGN	BS3 | BP1 | BP4 | BP6	neutral
BRCA2	32910460T>A	1968T>A	T656=	synonymous codon	rs527579384	likely benign	VUS	-
BRCA2	32910462T>A	1970T>A	L657*	stop gained	rs397507279	pathogenic	PATHOGENIC	PVS1 | PS1 | PP5 | BS1	HRD deficient
BRCA2	32910472T>C	1980T>C	T660=	synonymous codon	rs763714374	likely benign	VUS	PM2
BRCA2	32910473AG>A	1982del	S661fs	frameshift variant	rs1060502455	pathogenic	PATHOGENIC	PVS1 | PS1 | PM2 | PP5	HRD deficient
BRCA2	32910476T>TAGCT	1981_1984dup	S662*	stop gained	rs886040399	pathogenic	PATHOGENIC	PVS1 | PS1 | PM2 | PP5	HRD deficient
BRCA2	32910480TT>T	1989del	F663fs	frameshift variant	rs886038068	pathogenic	PATHOGENIC	PVS1 | PS1 | PM2 | PP5	HRD deficient
BRCA2	32910487A>G	1995A>G	T665=	synonymous codon	rs750349385	likely benign	VUS	PM2
BRCA2	32910496G>A	2004G>A	R668=	synonymous codon	rs755049218	likely benign	VUS	-
BRCA2	32910514A>G	2022A>G	E674=	synonymous codon	rs758677638	likely benign	VUS	-
BRCA2	32910514AA>A	2023del	T675fs	frameshift variant	rs886040401	pathogenic	PATHOGENIC	PVS1 | PS1 | PM2 | PP5	HRD deficient
BRCA2	32910516CA>C	2025del	C676fs	frameshift variant	rs398122737	pathogenic	PATHOGENIC	PVS1 | PS1 | PM2 | PP5	HRD deficient
BRCA2	32910516CAT>C	2025_2026del	C676fs	frameshift variant	rs886040402	pathogenic	PATHOGENIC	PVS1 | PS1 | PM2 | PP5	HRD deficient
BRCA2	32910517A>G	2025A>G	T675=	synonymous codon	rs147381487	likely benign	VUS	-
BRCA2	32910517AT>A	2026del	C676fs	frameshift variant	rs80359317	pathogenic	PATHOGENIC	PVS1 | PS1 | PM2 | PP5	HRD deficient
BRCA2	32910525ATAATA>A	2034_2038del	N679fs	frameshift variant	rs879255440	pathogenic	PATHOGENIC	PVS1 | PS1 | PM2 | PP5	HRD deficient
BRCA2	32910527AA>A	2036del	N679fs	frameshift variant	rs80359318	pathogenic	PATHOGENIC	PVS1 | PS1 | PM2 | PP5	HRD deficient
BRCA2	32910535A>G	2043A>G	V681=	synonymous codon	rs747363339	likely benign	LIKELY BENIGN	BS1
BRCA2	32910536AT>A	2045del	I682fs	frameshift variant	rs879254122	pathogenic	PATHOGENIC	PVS1 | PS1 | PM2 | PP5	HRD deficient
BRCA2	32910536ATC>A	2049_2050del	Q684fs	frameshift variant	rs80359319	pathogenic	PATHOGENIC	PVS1 | PS1 | PM2 | PP5	HRD deficient
BRCA2	32910538C>T	2046C>T	I682=	synonymous codon	rs876660868	likely benign	VUS	PM2
BRCA2	32910550TGATTA>T	2059_2063del	D687*	stop gained	rs587782780	pathogenic	PATHOGENIC	PVS1 | PS1 | PM2 | PP5	HRD deficient
BRCA2	32910556T>G	2064T>G	Y688*	stop gained	rs80358485	pathogenic	PATHOGENIC	PVS1 | PS1 | PM2 | PP5	HRD deficient
BRCA2	32910574T>C	2082T>C	N694=	synonymous codon	rs777141329	likely benign	VUS	-
BRCA2	32910576AGGAAA>A	2085_2089del	E696fs	frameshift variant	rs80359321	pathogenic	PATHOGENIC	PVS1 | PS1 | PM2 | PP5	HRD deficient
BRCA2	32910578G>T	2086G>T	E696*	stop gained	rs431825291	pathogenic	PATHOGENIC	PVS1 | PS1 | PM2 | PP5	HRD deficient
BRCA2	32910583A>AA	2091dup	L698fs	frameshift variant	rs431825292	pathogenic	PATHOGENIC	PVS1 | PS1 | PM2 | PP5	HRD deficient
BRCA2	32910583A>G	2091A>G	K697=	synonymous codon	rs876659230	likely benign	VUS	-
BRCA2	32910583AC>A	2092del	L698fs	frameshift variant	rs80359322	pathogenic	PATHOGENIC	PVS1 | PS1 | PM2 | PP5	HRD deficient
BRCA2	32910585TA>T	2094del	Q699fs	frameshift variant	rs80359323	pathogenic	PATHOGENIC	PVS1 | PS1 | PM2 | PP5	HRD deficient
BRCA2	32910586A>G	2094A>G	L698=	synonymous codon	rs28897714	likely benign	VUS	PM2
BRCA2	32910586ACA>A	2095_2096del	Q699fs	frameshift variant	rs886040403	pathogenic	PATHOGENIC	PVS1 | PS1 | PM2 | PP5	HRD deficient
BRCA2	32910587C>T	2095C>T	Q699*	stop gained	rs878853559	pathogenic	PATHOGENIC	PVS1 | PS1 | PM2 | PP5	HRD deficient
BRCA2	32910589G>A	2097G>A	Q699=	synonymous codon	rs80358486	likely benign	VUS	PM2
BRCA2	32910590TTATT>T	2103_2106del	F701fs	frameshift variant	rs80359324	pathogenic	PATHOGENIC	PVS1 | PS1 | PM2 | PP5	HRD deficient
BRCA2	32910601C>T	2109C>T	T703=	synonymous codon	rs762499878	likely benign	LIKELY BENIGN	BS1
BRCA2	32910602CC>C	2111del	P704fs	frameshift variant	rs886040404	pathogenic	PATHOGENIC	PVS1 | PS1 | PM2 | PP5	HRD deficient
BRCA2	32910614TCT>T	2125_2126del	L709fs	frameshift variant	rs879255441	pathogenic	PATHOGENIC	PVS1 | PS1 | PM2 | PP5	HRD deficient
BRCA2	32910617C>T	2125C>T	L709=	synonymous codon	rs80358489	likely benign	VUS	PM2
BRCA2	32910619G>C	2127G>C	L709=	synonymous codon	rs554040246	benign	LIKELY BENIGN	BS1 | BP6
BRCA2	32910621C>G	2129C>G	S710*	stop gained	rs886040405	pathogenic	PATHOGENIC	PVS1 | PS1 | PM2 | PP5	HRD deficient
BRCA2	32910625C>A	2133C>A	C711*	stop gained	rs535547513	pathogenic	PATHOGENIC	PVS1 | PS1 | PM2 | PP5	HRD deficient
BRCA2	32910625C>T	2133C>T	C711=	synonymous codon	rs535547513	likely benign	LIKELY BENIGN	BS1
BRCA2	32910628G>T	2136G>T	L712=	synonymous codon	rs886037813	likely benign	VUS	PM2
BRCA2	32910629C>T	2137C>T	Q713*	stop gained	rs886040407	pathogenic	PATHOGENIC	PVS1 | PS1 | PM2 | PP5	HRD deficient
BRCA2	32910637A>G	2145A>G	G715=	synonymous codon	rs112566179	benign	LIKELY BENIGN	BS1 | BP6
BRCA2	32910639A>AA	2147dup	C717fs	frameshift variant	rs886040408	pathogenic	PATHOGENIC	PVS1 | PS1 | PM2 | PP5	HRD deficient
BRCA2	32910640GTG>G	2151_2152del	C717*	stop gained	rs878853560	pathogenic	PATHOGENIC	PVS1 | PS1 | PM2 | PP5	HRD deficient
BRCA2	32910641TG>T	2150del	C717fs	frameshift variant	rs397507618	pathogenic	PATHOGENIC	PVS1 | PS1 | PM2 | PP5	HRD deficient
BRCA2	32910643T>A	2151T>A	C717*	stop gained	rs876660512	pathogenic	PATHOGENIC	PVS1 | PS1 | PM2 | PP5	HRD deficient
BRCA2	32910647AATGA>A	2156_2159del	N719fs	frameshift variant	rs1555282489	pathogenic	PATHOGENIC	PVS1 | PS1 | PM2 | PP5	HRD deficient
BRCA2	32910652T>C	2160T>C	D720=	synonymous codon	rs876660339	likely benign	VUS	PM2
BRCA2	32910667A>AA	2175dup	V726fs	frameshift variant	rs276174819	pathogenic	PATHOGENIC	PVS1 | PS1 | PM2 | PP5	HRD deficient
BRCA2	32910667A>G	2175A>G	K725=	synonymous codon	rs80358491	likely benign	VUS	PM2
BRCA2	32910673A>G	2181A>G	S727=	synonymous codon	rs876660424	likely benign	VUS	PM2
BRCA2	32910683GAAGAG>G	2192_2196del	E731fs	frameshift variant	rs1064793627	pathogenic	PATHOGENIC	PVS1 | PS1 | PM2 | PP5	HRD deficient
BRCA2	32910688GG>G	2197del	V733fs	frameshift variant	rs886040409	pathogenic	PATHOGENIC	PVS1 | PS1 | PM2 | PP5	HRD deficient
BRCA2	32910693T>TAA	2201_2202insAA	A735fs	frameshift variant	rs1555282521	pathogenic	PATHOGENIC	PVS1 | PS1 | PM2 | PP5	HRD deficient
BRCA2	32910694G>GAA	2202_2203insAA	A735fs	frameshift variant	rs886040410	pathogenic	PATHOGENIC	PVS1 | PS1 | PM2 | PP5	HRD deficient
BRCA2	32910697TG>T	2206del	A736fs	frameshift variant	rs886040411	pathogenic	PATHOGENIC	PVS1 | PS1 | PM2 | PP5	HRD deficient
BRCA2	32910699CA>C	2208del	A737fs	frameshift variant	rs886040412	pathogenic	PATHOGENIC	PVS1 | PS1 | PM2 | PP5	HRD deficient
BRCA2	32910700A>G	2208A>G	A736=	synonymous codon	rs144984153	likely benign	LIKELY BENIGN	BS1
BRCA2	32910700AGCATGTCA>A	2209_2216del	A737fs	frameshift variant	rs886040413	pathogenic	PATHOGENIC	PVS1 | PS1 | PM2 | PP5	HRD deficient
BRCA2	32910703A>C	2211A>C	A737=	synonymous codon	rs587780647	likely benign	VUS	PM2
BRCA2	32910703A>G	2211A>G	A737=	synonymous codon	rs587780647	likely benign	VUS	PM2
BRCA2	32910704T>TT	2212dup	C738fs	frameshift variant	rs80359325	pathogenic	PATHOGENIC	PVS1 | PS1 | PM2 | PP5	HRD deficient
BRCA2	32910706T>A	2214T>A	C738*	stop gained	rs398122742	pathogenic	PATHOGENIC	PVS1 | PS1 | PM2 | PP5	HRD deficient
BRCA2	32910709C>T	2217C>T	H739=	synonymous codon	rs1131692117	likely benign	VUS	PM2
BRCA2	32910716C>T	2224C>T	Q742*	stop gained	rs80358494	pathogenic	PATHOGENIC	PVS1 | PS1 | PM2 | PP5	HRD deficient
BRCA2	32910717AA>A	2226del	Q742fs	frameshift variant	rs886038070	pathogenic	PATHOGENIC	PVS1 | PS1 | PM2 | PP5	HRD deficient
BRCA2	32910718A>G	2226A>G	Q742=	synonymous codon	rs748757085	likely benign	VUS	PM2
BRCA2	32910721T>C	2229T>C	H743=	synonymous codon	rs1801499	benign	BENIGN	BA1 | BP6	neutral
BRCA2	32910723C>A	2231C>A	S744*	stop gained	rs397507282	pathogenic	PATHOGENIC	PVS1 | PS1 | PM2 | PP5	HRD deficient
BRCA2	32910723C>G	2231C>G	S744*	stop gained	rs397507282	pathogenic	PATHOGENIC	PVS1 | PS1 | PM2 | PP5	HRD deficient
BRCA2	32910726AA>A	2235del	V746fs	frameshift variant	rs1060502484	pathogenic	PATHOGENIC	PVS1 | PS1 | PM2 | PP5	HRD deficient
BRCA2	32910731G>T	2239G>T	E747*	stop gained	rs878853561	pathogenic	PATHOGENIC	PVS1 | PS1 | PM2 | PP5	HRD deficient
BRCA2	32910735ACA>A	2244_2245del	Y748*	stop gained	rs879255442	pathogenic	PATHOGENIC	PVS1 | PS1 | PM2 | PP5	HRD deficient
BRCA2	32910736C>CTTCAAAAGTGGAATTCAAAA	2244_2245insTTCAAAAGTGGAATTCAAAA	S749fs	frameshift variant	rs1555282569	pathogenic	PATHOGENIC	PVS1 | PS1 | PM2 | PP5	HRD deficient
BRCA2	32910737A>ATTCAAAAGTGGAATTCAAAA	2245_2246insTTCAAAAGTGGAATTCAAAA	S749fs	frameshift variant	rs886040415	pathogenic	PATHOGENIC	PVS1 | PS1 | PM2 | PP5	HRD deficient
BRCA2	32910743A>AA	2251dup	T751fs	frameshift variant	rs886040416	pathogenic	PATHOGENIC	PVS1 | PS1 | PM2 | PP5	HRD deficient
BRCA2	32910744CTG>C	2253_2254del	D752fs	frameshift variant	rs398122744	pathogenic	PATHOGENIC	PVS1 | PS1 | PM2 | PP5	HRD deficient
BRCA2	32910745T>G	2253T>G	T751=	synonymous codon	rs760593257	likely benign	LIKELY BENIGN	BS1
BRCA2	32910745TGACT>T	2254_2257del	D752fs	frameshift variant	rs80359326	pathogenic	PATHOGENIC	PVS1 | PS1 | PM2 | PP5	HRD deficient
BRCA2	32910747A>AA	2255dup	D752fs	frameshift variant	rs886040417	pathogenic	PATHOGENIC	PVS1 | PS1 | PM2 | PP5	HRD deficient
BRCA2	32910747AC>A	2256del	Q754fs	frameshift variant	rs876659318	pathogenic	PATHOGENIC	PVS1 | PS1 | PM2 | PP5	HRD deficient
BRCA2	32910748C>T	2256C>T	D752=	synonymous codon	rs766384913	likely benign	LIKELY BENIGN	BS1
BRCA2	32910750TT>T	2259del	Q754fs	frameshift variant	rs397507621	pathogenic	PATHOGENIC	PVS1 | PS1 | PM2 | PP5	HRD deficient
BRCA2	32910754A>G	2262A>G	Q754=	synonymous codon	rs1057520621	likely benign	VUS	PM2
BRCA2	32910757C>T	2265C>T	S755=	synonymous codon	rs1131692132	likely benign	VUS	PM2
BRCA2	32910758C>CC	2266dup	Q756fs	frameshift variant	rs886040418	pathogenic	PATHOGENIC	PVS1 | PS1 | PM2 | PP5	HRD deficient
BRCA2	32910758C>T	2266C>T	Q756*	stop gained	rs1057518637	pathogenic	PATHOGENIC	PVS1 | PS1 | PM2 | PP5	HRD deficient
BRCA2	32910761A>T	2269A>T	K757*	stop gained	rs886040419	pathogenic	PATHOGENIC	PVS1 | PS1 | PM2 | PP5	HRD deficient
BRCA2	32910762AAA>A	2271_2272del	L759fs	frameshift variant	rs886040420	pathogenic	PATHOGENIC	PVS1 | PS1 | PM2 | PP5	HRD deficient
BRCA2	32910764AG>A	2273del	S758fs	frameshift variant	rs1064795934	pathogenic	PATHOGENIC	PVS1 | PS1 | PM2 | PP5	HRD deficient
BRCA2	32910766T>C	2274T>C	S758=	synonymous codon	rs142243359	likely benign	LIKELY BENIGN	BS1
BRCA2	32910769TTT>T	2278_2279del	L760fs	frameshift variant	rs886038071	pathogenic	PATHOGENIC	PVS1 | PS1 | PM2 | PP5	HRD deficient
BRCA2	32910770TT>T	2279del	L760fs	frameshift variant	rs886038071	pathogenic	PATHOGENIC	PVS1 | PS1 | PM2 | PP5	HRD deficient
BRCA2	32910770TTATAT>T	2279_2283del	L760*	stop gained	rs770648856	pathogenic	PATHOGENIC	PVS1 | PS1 | PM2 | PP5	HRD deficient
BRCA2	32910778T>C	2286T>C	D762=	synonymous codon	rs786202227	likely benign	VUS	PM2
BRCA2	32910778TC>T	2287del	H763fs	frameshift variant	rs80359327	pathogenic	PATHOGENIC	PVS1 | PS1 | PM2 | PP5	HRD deficient
BRCA2	32910804T>G	2312T>G	L771*	stop gained	rs587782095	pathogenic	PATHOGENIC	PVS1 | PS1 | PP5	HRD deficient
BRCA2	32910810CT>C	2319del	T774fs	frameshift variant	rs774808238	pathogenic	PATHOGENIC	PVS1 | PS1 | PM2 | PP5	HRD deficient
BRCA2	32910814T>G	2322T>G	T774=	synonymous codon	rs1131692124	likely benign	VUS	PM2
BRCA2	32910816CC>C	2325del	K776fs	frameshift variant	rs397507284	pathogenic	PATHOGENIC	PVS1 | PS1 | PM2 | PP5	HRD deficient
BRCA2	32910822A>AA	2330dup	D777fs	frameshift variant	rs80359328	pathogenic	PATHOGENIC	PVS1 | PS1 | PM2 | PP5	HRD deficient
BRCA2	32910827CT>C	2336del	L779fs	frameshift variant	rs1064793467	pathogenic	PATHOGENIC	PVS1 | PS1 | PM2 | PP5	HRD deficient
BRCA2	32910829G>T	2337G>T	L779=	synonymous codon	rs80359784	likely benign	VUS	PM2
BRCA2	32910831C>G	2339C>G	S780*	stop gained	rs587781471	pathogenic	PATHOGENIC	PVS1 | PS1 | PM2 | PP5	HRD deficient
BRCA2	32910842A>G	2350A>G	M784V	missense	rs11571653	benign	BENIGN	BA1 | BS1 | BS3 | BP1 | BP4 | BP6	neutral
BRCA2	32910855GC>G	2364del	E790fs	frameshift variant	rs886038074	pathogenic	PATHOGENIC	PVS1 | PS1 | PM2 | PP5	HRD deficient
BRCA2	32910856C>T	2364C>T	G788=	synonymous codon	rs773035582	likely benign	VUS	-
BRCA2	32910860G>T	2368G>T	E790*	stop gained	rs398122746	pathogenic	PATHOGENIC	PVS1 | PS1 | PM2 | PP5	HRD deficient
BRCA2	32910861AA>A	2370del	E790fs	frameshift variant	rs398122747	pathogenic	PATHOGENIC	PVS1 | PS1 | PM2 | PP5	HRD deficient
BRCA2	32910864C>A	2372C>A	S791*	stop gained	rs397507624	pathogenic	PATHOGENIC	PVS1 | PS1 | PM2 | PP5	HRD deficient
BRCA2	32910868C>A	2376C>A	Y792*	stop gained	rs80358503	pathogenic	PATHOGENIC	PVS1 | PS1 | PM2 | PP5 | BS1	HRD deficient
BRCA2	32910868C>G	2376C>G	Y792*	stop gained	rs80358503	pathogenic	PATHOGENIC	PVS1 | PS1 | PM2 | PP5	HRD deficient
BRCA2	32910872A>AA	2380dup	M794fs	frameshift variant	rs730881602	pathogenic	PATHOGENIC	PVS1 | PS1 | PM2 | PP5	HRD deficient
BRCA2	32910883G>A	2391G>A	K797=	synonymous codon	rs587776462	likely benign	LIKELY BENIGN	BS1
BRCA2	32910888AA>A	2397del	G800fs	frameshift variant	rs886040422	pathogenic	PATHOGENIC	PVS1 | PS1 | PM2 | PP5	HRD deficient
BRCA2	32910891G>GG	2399dup	N801*	stop gained	rs886040423	pathogenic	PATHOGENIC	PVS1 | PS1 | PM2 | PP5	HRD deficient
BRCA2	32910893AACAATTATGAA>A	2402_2412del	N801fs	frameshift variant	rs397507625	pathogenic	PATHOGENIC	PVS1 | PS1 | PM2 | PP5	HRD deficient
BRCA2	32910893AACAATTATGAATCTGATGT>A	2402_2420del	N801fs	frameshift variant	rs886040923	pathogenic	PATHOGENIC	PVS1 | PS1 | PM2 | PP5	HRD deficient
BRCA2	32910901T>C	2409T>C	Y803=	synonymous codon	rs80358504	likely benign	VUS	PM2
BRCA2	32910901T>G	2409T>G	Y803*	stop gained	rs80358504	pathogenic	PATHOGENIC	PVS1 | PS1 | PM2 | PP5	HRD deficient
BRCA2	32910904A>G	2412A>G	E804=	synonymous codon	rs587780866	likely benign	LIKELY BENIGN	BS1
BRCA2	32910907T>C	2415T>C	S805=	synonymous codon	rs876658319	likely benign	VUS	PM2
BRCA2	32910908G>C	2416G>C	D806H	missense	rs56404215	benign	BENIGN	BS1 | BS3 | BP1 | BP4 | BP6	neutral
BRCA2	32910910T>C	2418T>C	D806=	synonymous codon	rs1131692107	likely benign	VUS	PM2
BRCA2	32910913T>TT	2421dup	E808*	stop gained	rs886040424	pathogenic	PATHOGENIC	PVS1 | PS1 | PM2 | PP5	HRD deficient
BRCA2	32910915A>AGGTAACAATTATGAATCTGATGTTGA	2398_2423dup	L809fs	frameshift variant	rs1555282658	pathogenic	PATHOGENIC	PVS1 | PS1 | PM2 | PP5	HRD deficient
BRCA2	32910916A>G	2424A>G	E808=	synonymous codon	rs55646808	likely benign	VUS	PM2
BRCA2	32910918T>G	2426T>G	L809*	stop gained	rs397507285	pathogenic	PATHOGENIC	PVS1 | PS1 | PM2 | PP5	HRD deficient
BRCA2	32910921CCAAAAATA>C	2430_2437del	K811fs	frameshift variant	rs886040425	pathogenic	PATHOGENIC	PVS1 | PS1 | PM2 | PP5	HRD deficient
BRCA2	32910926AA>A	2435del	N812fs	frameshift variant	rs80359329	pathogenic	PATHOGENIC	PVS1 | PS1 | PM2 | PP5	HRD deficient
BRCA2	32910927A>AA	2435dup	N812fs	frameshift variant	rs80359329	pathogenic	PATHOGENIC	PVS1 | PS1 | PM2 | PP5	HRD deficient
BRCA2	32910931T>TT	2439dup	P814fs	frameshift variant	rs276174822	pathogenic	PATHOGENIC	PVS1 | PS1 | PM2 | PP5	HRD deficient
BRCA2	32910933CC>C	2442del	M815fs	frameshift variant	rs397507627	pathogenic	PATHOGENIC	PVS1 | PS1 | PM2 | PP5	HRD deficient
BRCA2	32910937GG>G	2446del	E816fs	frameshift variant	rs80359330	pathogenic	PATHOGENIC	PVS1 | PS1 | PM2 | PP5	HRD deficient
BRCA2	32910941AA>A	2450del	K817fs	frameshift variant	rs80359331	pathogenic	PATHOGENIC	PVS1 | PS1 | PM2 | PP5	HRD deficient
BRCA2	32910944A>AGA	2451_2452dup	N818fs	frameshift variant	rs886040426	pathogenic	PATHOGENIC	PVS1 | PS1 | PM2 | PP5	HRD deficient
BRCA2	32910947C>T	2455C>T	Q819*	stop gained	rs397507629	pathogenic	PATHOGENIC	PVS1 | PS1 | PM2 | PP5	HRD deficient
BRCA2	32910962TT>T	2471del	L824*	stop gained	rs886040427	pathogenic	PATHOGENIC	PVS1 | PS1 | PM2 | PP5	HRD deficient
BRCA2	32910962TTAAATG>T	2471_2476del	L824*	stop gained	rs276174823	pathogenic	PATHOGENIC	PVS1 | PS1 | PM2 | PP5	HRD deficient
BRCA2	32910963T>G	2471T>G	L824*	stop gained	rs397507631	pathogenic	PATHOGENIC	PVS1 | PS1 | PM2 | PP5	HRD deficient
BRCA2	32910965AA>A	2474del	N825fs	frameshift variant	rs1060502437	pathogenic	PATHOGENIC	PVS1 | PS1 | PM2 | PP5	HRD deficient
BRCA2	32910972A>AA	2480dup	N827fs	frameshift variant	rs397507286	pathogenic	PATHOGENIC	PVS1 | PS1 | PM2 | PP5	HRD deficient
BRCA2	32910976T>C	2484T>C	Y828=	synonymous codon	rs45619134	likely benign	LIKELY BENIGN	BS1
BRCA2	32910981A>AT	2489_2490insT	V831fs	frameshift variant	rs1555282700	pathogenic	PATHOGENIC	PVS1 | PS1 | PM2 | PP5	HRD deficient
BRCA2	32910982C>CT	2490_2491insT	V831fs	frameshift variant	rs886040430	pathogenic	PATHOGENIC	PVS1 | PS1 | PM2 | PP5	HRD deficient
BRCA2	32910982C>T	2490C>T	N830=	synonymous codon	rs56331088	likely benign	LIKELY BENIGN	BS1
BRCA2	32910986G>T	2494G>T	E832*	stop gained	rs786202875	pathogenic	PATHOGENIC	PVS1 | PS1 | PM2 | PP5	HRD deficient
BRCA2	32910988G>A	2496G>A	E832=	synonymous codon	rs786201479	likely benign	VUS	PM2
BRCA2	32910991G>A	2499G>A	L833=	synonymous codon	rs1131692118	likely benign	VUS	PM2
BRCA2	32910992TT>T	2501del	L834fs	frameshift variant	rs876659862	pathogenic	PATHOGENIC	PVS1 | PS1 | PM2 | PP5	HRD deficient
BRCA2	32911000TGAAAA>T	2509_2513del	E837fs	frameshift variant	rs886040431	pathogenic	PATHOGENIC	PVS1 | PS1 | PM2 | PP5	HRD deficient
BRCA2	32911005AA>A	2514del	K838fs	frameshift variant	rs886040433	pathogenic	PATHOGENIC	PVS1 | PS1 | PM2 | PP5	HRD deficient
BRCA2	32911006A>AA	2514dup	Y839fs	frameshift variant	rs886040433	pathogenic	PATHOGENIC	PVS1 | PS1 | PM2 | PP5	HRD deficient
BRCA2	32911009C>A	2517C>A	Y839*	stop gained	rs80358516	pathogenic	PATHOGENIC	PVS1 | PS1 | PM2 | PP5	HRD deficient
BRCA2	32911018A>AA	2526dup	A843fs	frameshift variant	rs80359332	pathogenic	PATHOGENIC	PVS1 | PS1 | PM2 | PP5	HRD deficient
BRCA2	32911018A>C	2526A>C	V842=	synonymous codon	rs770778164	likely benign	LIKELY BENIGN	BS1
BRCA2	32911018A>G	2526A>G	V842=	synonymous codon	rs770778164	likely benign	VUS	-
BRCA2	32911027T>G	2535T>G	P845=	synonymous codon	rs776556224	likely benign	VUS	PM2
BRCA2	32911029C>G	2537C>G	S846*	stop gained	rs80358518	pathogenic	PATHOGENIC	PVS1 | PS1 | PM2 | PP5	HRD deficient
BRCA2	32911030A>C	2538A>C	S846=	synonymous codon	rs11571654	benign	LIKELY BENIGN	BS1 | BP6
BRCA2	32911030A>G	2538A>G	S846=	synonymous codon	rs11571654	likely benign	VUS	PM2
BRCA2	32911031A>AA	2539dup	R847fs	frameshift variant	rs886040436	pathogenic	PATHOGENIC	PVS1 | PS1 | PM2 | PP5	HRD deficient
BRCA2	32911031A>T	2539A>T	R847*	stop gained	rs886040435	pathogenic	PATHOGENIC	PVS1 | PS1 | PM2 | PP5	HRD deficient
BRCA2	32911036GG>G	2545del	V849fs	frameshift variant	rs80359333	pathogenic	PATHOGENIC	PVS1 | PS1 | PM2 | PP5	HRD deficient
BRCA2	32911040C>T	2548C>T	Q850*	stop gained	rs886038075	pathogenic	PATHOGENIC	PVS1 | PS1 | PM2 | PP5	HRD deficient
BRCA2	32911044TC>T	2553del	F851fs	frameshift variant	rs886040437	pathogenic	PATHOGENIC	PVS1 | PS1 | PM2 | PP5	HRD deficient
BRCA2	32911053ACA>A	2564_2565del	T855fs	frameshift variant	rs80359334	pathogenic	PATHOGENIC	PVS1 | PS1 | PM2 | PP5	HRD deficient
BRCA2	32911061C>T	2569C>T	L857=	synonymous codon	rs767596766	likely benign	VUS	PM2
BRCA2	32911062T>TT	2570dup	R858fs	frameshift variant	rs587782361	pathogenic	PATHOGENIC	PVS1 | PS1 | PM2 | PP5	HRD deficient
BRCA2	32911073C>T	2581C>T	Q861*	stop gained	rs773356478	pathogenic	PATHOGENIC	PVS1 | PS1 | PM2 | PP5	HRD deficient
BRCA2	32911077AAAATCAA>A	2586_2592del	N863fs	frameshift variant	rs80359336	pathogenic	PATHOGENIC	PVS1 | PS1 | PM2 | PP5	HRD deficient
BRCA2	32911080A>AA	2588dup	N863fs	frameshift variant	rs80359335	pathogenic	PATHOGENIC	PVS1 | PS1 | PM2 | PP5	HRD deficient
BRCA2	32911080AT>A	2589del	Q864fs	frameshift variant	rs397507632	pathogenic	PATHOGENIC	PVS1 | PS1 | PM2 | PP5	HRD deficient
BRCA2	32911082C>T	2590C>T	Q864*	stop gained	rs1060502414	pathogenic	PATHOGENIC	PVS1 | PS1 | PM2 | PP5	HRD deficient
BRCA2	32911085G>T	2593G>T	E865*	stop gained	rs587782014	pathogenic	PATHOGENIC	PVS1 | PS1 | PM2 | PP5	HRD deficient
BRCA2	32911086AA>A	2595del	E866fs	frameshift variant	rs483353111	pathogenic	PATHOGENIC	PVS1 | PS1 | PM2 | PP5	HRD deficient
BRCA2	32911087AGAAA>A	2596_2599del	E866fs	frameshift variant	rs397507633	pathogenic	PATHOGENIC	PVS1 | PS1 | PM2 | PP5	HRD deficient
BRCA2	32911090A>G	2598A>G	E866=	synonymous codon	rs587780549	likely benign	VUS	PM2
BRCA2	32911093T>G	2601T>G	T867=	synonymous codon	rs730881589	likely benign	VUS	PM2
BRCA2	32911094AC>A	2603del	T868fs	frameshift variant	rs276174824	pathogenic	PATHOGENIC	PVS1 | PS1 | PM2 | PP5	HRD deficient
BRCA2	32911098C>G	2606C>G	S869*	stop gained	rs80358523	pathogenic	PATHOGENIC	PVS1 | PS1 | PM2 | PP5	HRD deficient
BRCA2	32911103T>TT	2611dup	S871fs	frameshift variant	rs876658929	pathogenic	PATHOGENIC	PVS1 | PS1 | PM2 | PP5	HRD deficient
BRCA2	32911103TC>TTTT	2612delinsTTT	S871fs	frameshift variant	rs397507635	pathogenic	PATHOGENIC	PVS1 | PS1 | PM2 | PP5	HRD deficient
BRCA2	32911104C>A	2612C>A	S871*	stop gained	rs397507634	pathogenic	PATHOGENIC	PVS1 | PS1 | PP5 | BS1	HRD deficient
BRCA2	32911104C>G	2612C>G	S871*	stop gained	rs397507634	pathogenic	PATHOGENIC	PVS1 | PS1 | PM2 | PP5	HRD deficient
BRCA2	32911108A>G	2616A>G	K872=	synonymous codon	rs202047206	likely benign	VUS	PM2
BRCA2	32911109A>AA	2617dup	I873fs	frameshift variant	rs398122748	pathogenic	PATHOGENIC	PVS1 | PS1 | PM2 | PP5	HRD deficient
BRCA2	32911109ATA>A	2618_2619del	I873fs	frameshift variant	rs397507290	pathogenic	PATHOGENIC	PVS1 | PS1 | PM2 | PP5	HRD deficient
BRCA2	32911110T>TT	2618dup	T874fs	frameshift variant	rs398122749	pathogenic	PATHOGENIC	PVS1 | PS1 | PM2 | PP5	HRD deficient
BRCA2	32911113C>CG	2621_2622insG	V875fs	frameshift variant	rs1555282757	pathogenic	PATHOGENIC	PVS1 | PS1 | PM2 | PP5	HRD deficient
BRCA2	32911114T>TT	2622dup	V875fs	frameshift variant	rs886038076	pathogenic	PATHOGENIC	PVS1 | PS1 | PM2 | PP5	HRD deficient
BRCA2	32911114TGT>T	2623_2624del	V875fs	frameshift variant	rs876658928	pathogenic	PATHOGENIC	PVS1 | PS1 | PM2 | PP5	HRD deficient
BRCA2	32911125ACT>A	2636_2637del	S879*	stop gained	rs276174826	pathogenic	PATHOGENIC	PVS1 | PS1 | PM2 | PP5	HRD deficient
BRCA2	32911128CTG>C	2637_2638del	E880fs	frameshift variant	rs397507636	pathogenic	PATHOGENIC	PVS1 | PS1 | PM2 | PP5	HRD deficient
BRCA2	32911133G>T	2641G>T	E881*	stop gained	rs876658648	pathogenic	PATHOGENIC	PVS1 | PS1 | PM2 | PP5	HRD deficient
BRCA2	32911138T>A	2646T>A	L882=	synonymous codon	rs886038221	likely benign	VUS	PM2
BRCA2	32911139TT>T	2648del	F883fs	frameshift variant	rs886038077	pathogenic	PATHOGENIC	PVS1 | PS1 | PM2 | PP5	HRD deficient
BRCA2	32911141CT>C	2650del	S884fs	frameshift variant	rs886040438	pathogenic	PATHOGENIC	PVS1 | PS1 | PM2 | PP5	HRD deficient
BRCA2	32911143C>A	2651C>A	S884*	stop gained	rs777421358	pathogenic	PATHOGENIC	PVS1 | PS1 | PM2 | PP5	HRD deficient
BRCA2	32911143C>G	2651C>G	S884*	stop gained	rs777421358	pathogenic	PATHOGENIC	PVS1 | PS1 | PM2 | PP5	HRD deficient
BRCA2	32911144AGACA>A	2653_2656del	D885fs	frameshift variant	rs80359340	pathogenic	PATHOGENIC	PVS1 | PS1 | PM2 | PP5	HRD deficient
BRCA2	32911146ACA>A	2655_2656del	D885fs	frameshift variant	rs764019690	pathogenic	PATHOGENIC	PVS1 | PS1 | PM2 | PP5	HRD deficient
BRCA2	32911148AA>A	2657del	N886fs	frameshift variant	rs886040439	pathogenic	PATHOGENIC	PVS1 | PS1 | PM2 | PP5	HRD deficient
BRCA2	32911149ATG>A	2658_2659del	N886fs	frameshift variant	rs397507291	pathogenic	PATHOGENIC	PVS1 | PS1 | PM2 | PP5	HRD deficient
BRCA2	32911151G>GTG	2658_2659dup	E887fs	frameshift variant	rs753953146	pathogenic	PATHOGENIC	PVS1 | PS1 | PM2 | PP5	HRD deficient
BRCA2	32911153G>A	2661G>A	E887=	synonymous codon	rs876659892	likely benign	VUS	PM2
BRCA2	32911159T>C	2667T>C	N889=	synonymous codon	rs587782469	likely benign	VUS	PM2
BRCA2	32911161TT>T	2670del	F890fs	frameshift variant	rs1555282786	pathogenic	PATHOGENIC	PVS1 | PS1 | PM2 | PP5	HRD deficient
BRCA2	32911168CC>C	2677del	Q893fs	frameshift variant	rs879254111	pathogenic	PATHOGENIC	PVS1 | PS1 | PM2 | PP5	HRD deficient
BRCA2	32911172G>A	2680G>A	V894I	missense	rs28897715	benign	BENIGN	BS1 | BS3 | BP1 | BP4 | BP6	neutral
BRCA2	32911175GC>G	2684del	A895fs	frameshift variant	rs80359342	pathogenic	PATHOGENIC	PVS1 | PS1 | PM2 | PP5	HRD deficient
BRCA2	32911180T>C	2688T>C	N896=	synonymous codon	rs769652613	likely benign	VUS	PM2
BRCA2	32911183AAGGAA>A	2692_2696del	R898*	stop gained	rs398122752	pathogenic	PATHOGENIC	PVS1 | PS1 | PM2 | PP5	HRD deficient
BRCA2	32911192TC>T	2701del	A902fs	frameshift variant	rs397507637	pathogenic	PATHOGENIC	PVS1 | PS1 | PM2 | PP5	HRD deficient
BRCA2	32911194TT>T	2703del	A902fs	frameshift variant	rs886040440	pathogenic	PATHOGENIC	PVS1 | PS1 | PM2 | PP5	HRD deficient
BRCA2	32911195T>A	2703T>A	L901=	synonymous codon	rs786201627	likely benign	VUS	PM2
BRCA2	32911208A>AA	2716dup	T906fs	frameshift variant	rs876659767	pathogenic	PATHOGENIC	PVS1 | PS1 | PM2 | PP5	HRD deficient
BRCA2	32911222TG>T	2731del	E911fs	frameshift variant	rs80359344	pathogenic	PATHOGENIC	PVS1 | PS1 | PM2 | PP5	HRD deficient
BRCA2	32911229GACTTG>G	2743_2747del	T915fs	frameshift variant	rs786204752	pathogenic	PATHOGENIC	PVS1 | PS1 | PM2 | PP5	HRD deficient
BRCA2	32911231C>T	2739C>T	D913=	synonymous codon	rs276174829	likely benign	VUS	-
BRCA2	32911236CTT>C	2745_2746del	V917fs	frameshift variant	rs886040442	pathogenic	PATHOGENIC	PVS1 | PS1 | PM2 | PP5	HRD deficient
BRCA2	32911239GT>G	2748del	C916fs	frameshift variant	rs886040443	pathogenic	PATHOGENIC	PVS1 | PS1 | PM2 | PP5	HRD deficient
BRCA2	32911240T>A	2748T>A	C916*	stop gained	rs397507638	pathogenic	PATHOGENIC	PVS1 | PS1 | PM2 | PP5	HRD deficient
BRCA2	32911243A>G	2751A>G	V917=	synonymous codon	rs765644162	likely benign	LIKELY BENIGN	BS1
BRCA2	32911244AA>A	2753del	N918fs	frameshift variant	rs886040444	pathogenic	PATHOGENIC	PVS1 | PS1 | PM2 | PP5	HRD deficient
BRCA2	32911245AC>A	2754del	N918fs	frameshift variant	rs1555282830	pathogenic	PATHOGENIC	PVS1 | PS1 | PM2 | PP5	HRD deficient
BRCA2	32911246C>T	2754C>T	N918=	synonymous codon	rs753073979	likely benign	VUS	-
BRCA2	32911249A>AATGG	2757_2758insATGG	P920fs	frameshift variant	rs1555282834	pathogenic	PATHOGENIC	PVS1 | PS1 | PM2 | PP5	HRD deficient
BRCA2	32911250C>CATGG	2758_2759insATGG	P920fs	frameshift variant	rs886040445	pathogenic	PATHOGENIC	PVS1 | PS1 | PM2 | PP5	HRD deficient
BRCA2	32911251CC>C	2760del	I921fs	frameshift variant	rs80359346	pathogenic	PATHOGENIC	PVS1 | PS1 | PM2 | PP5	HRD deficient
BRCA2	32911255TTTCAAGAACTCTAC>T	2764_2777del	F922fs	frameshift variant	rs886040446	pathogenic	PATHOGENIC	PVS1 | PS1 | PM2 | PP5	HRD deficient
BRCA2	32911257T>TT	2765dup	K923fs	frameshift variant	rs397507639	pathogenic	PATHOGENIC	PVS1 | PS1 | PM2 | PP5	HRD deficient
BRCA2	32911263ACT>A	2774_2775del	S925fs	frameshift variant	rs397507641	pathogenic	PATHOGENIC	PVS1 | PS1 | PM2 | PP5	HRD deficient
BRCA2	32911264C>T	2772C>T	N924=	synonymous codon	rs876659051	likely benign	VUS	PM2
BRCA2	32911265T>TT	2773dup	S925fs	frameshift variant	rs397507640	pathogenic	PATHOGENIC	PVS1 | PS1 | PM2 | PP5	HRD deficient
BRCA2	32911266CT>C	2775del	T926fs	frameshift variant	rs1064793063	pathogenic	PATHOGENIC	PVS1 | PS1 | PM2 | PP5	HRD deficient
BRCA2	32911267T>C	2775T>C	S925=	synonymous codon	rs756859735	likely benign	VUS	PM2
BRCA2	32911267T>TT	2775dup	T926fs	frameshift variant	rs886040447	pathogenic	PATHOGENIC	PVS1 | PS1 | PM2 | PP5	HRD deficient
BRCA2	32911272TGGTTT>T	2781_2785del	M927fs	frameshift variant	rs886040448	pathogenic	PATHOGENIC	PVS1 | PS1 | PM2 | PP5	HRD deficient
BRCA2	32911277TT>T	2786del	L929fs	frameshift variant	rs80359347	pathogenic	PATHOGENIC	PVS1 | PS1 | PM2 | PP5	HRD deficient
BRCA2	32911278T>C	2786T>C	L929S	missense	rs2227943	benign	BENIGN	BA1 | BS3 | BP1 | BP4 | BP6	neutral
BRCA2	32911278T>TT	2786dup	L929fs	frameshift variant	rs80359347	pathogenic	PATHOGENIC	PVS1 | PS1 | PM2 | PP5	HRD deficient
BRCA2	32911285A>G	2793A>G	G931=	synonymous codon	rs786201315	likely benign	VUS	PM2
BRCA2	32911287ACA>A	2798_2799del	T933fs	frameshift variant	rs80359348	pathogenic	PATHOGENIC	PVS1 | PS1 | PM2 | PP5	HRD deficient
BRCA2	32911289AC>A	2798del	T933fs	frameshift variant	rs80359349	pathogenic	PATHOGENIC	PVS1 | PS1 | PM2 | PP5	HRD deficient
BRCA2	32911296ATAAA>A	2805_2808del	A938fs	frameshift variant	rs80359350	pathogenic	PATHOGENIC	PVS1 | PS1 | PM2 | PP5	HRD deficient
BRCA2	32911297T>C	2805T>C	D935=	synonymous codon	rs749138071	likely benign	VUS	PM2
BRCA2	32911299AA>A	2808del	K936fs	frameshift variant	rs398122753	pathogenic	PATHOGENIC	PVS1 | PS1 | PM2 | PP5	HRD deficient
BRCA2	32911299AACAA>A	2808_2811del	A938fs	frameshift variant	rs80359351	pathogenic	PATHOGENIC	PVS1 | PS1 | PM2 | PP5	HRD deficient
BRCA2	32911301CAA>C	2810_2811del	Q937fs	frameshift variant	rs80359353	pathogenic	PATHOGENIC	PVS1 | PS1 | PM2 | PP5	HRD deficient
BRCA2	32911303AGCAA>A	2812_2815del	A938fs	frameshift variant	rs80359354	pathogenic	PATHOGENIC	PVS1 | PS1 | PM2 | PP5	HRD deficient
BRCA2	32911309C>T	2817C>T	T939=	synonymous codon	rs367921107	likely benign	LIKELY BENIGN	BS1
BRCA2	32911310C>T	2818C>T	Q940*	stop gained	rs80358532	pathogenic	PATHOGENIC	PVS1 | PS1 | PM2 | PP5	HRD deficient
BRCA2	32911312A>G	2820A>G	Q940=	synonymous codon	rs771061558	likely benign	VUS	PM2
BRCA2	32911315G>A	2823G>A	V941=	synonymous codon	rs876659897	likely benign	VUS	PM2
BRCA2	32911319ATTAA>A	2828_2831del	I943fs	frameshift variant	rs397507643	pathogenic	PATHOGENIC	PVS1 | PS1 | PM2 | PP5	HRD deficient
BRCA2	32911322A>T	2830A>T	K944*	stop gained	rs80358533	pathogenic	PATHOGENIC	PVS1 | PS1 | PP5	HRD deficient
BRCA2	32911324A>ATT	2832_2833insTT	K945fs	frameshift variant	rs1555282889	pathogenic	PATHOGENIC	PVS1 | PS1 | PM2 | PP5	HRD deficient
BRCA2	32911325A>ATT	2833_2834insTT	K945fs	frameshift variant	rs80359355	pathogenic	PATHOGENIC	PVS1 | PS1 | PM2 | PP5	HRD deficient
BRCA2	32911325AAA>A	2834_2835del	K945fs	frameshift variant	rs80359356	pathogenic	PATHOGENIC	PVS1 | PS1 | PM2 | PP5	HRD deficient
BRCA2	32911326AA>A	2835del	D946fs	frameshift variant	rs80359356	pathogenic	PATHOGENIC	PVS1 | PS1 | PM2 | PP5	HRD deficient
BRCA2	32911327A>AA	2835dup	D946fs	frameshift variant	rs80359356	pathogenic	PATHOGENIC	PVS1 | PS1 | PM2 | PP5	HRD deficient
BRCA2	32911327AG>A	2836del	D946fs	frameshift variant	rs80359358	pathogenic	PATHOGENIC	PVS1 | PS1 | PM2 | PP5	HRD deficient
BRCA2	32911327AGA>A	2836_2837del	D946fs	frameshift variant	rs80359357	pathogenic	PATHOGENIC	PVS1 | PS1 | PM2 | PP5	HRD deficient
BRCA2	32911331TT>T	2840del	L947fs	frameshift variant	rs431825300	pathogenic	PATHOGENIC	PVS1 | PS1 | PM2 | PP5	HRD deficient
BRCA2	32911334G>GG	2842dup	V948fs	frameshift variant	rs80359359	pathogenic	PATHOGENIC	PVS1 | PS1 | PM2 | PP5	HRD deficient
BRCA2	32911336TT>T	2845del	Y949fs	frameshift variant	rs397507644	pathogenic	PATHOGENIC	PVS1 | PS1 | PM2 | PP5	HRD deficient
BRCA2	32911339T>A	2847T>A	Y949*	stop gained	rs886040449	pathogenic	PATHOGENIC	PVS1 | PS1 | PM2 | PP5	HRD deficient
BRCA2	32911345T>G	2853T>G	L951=	synonymous codon	rs1131692102	likely benign	VUS	PM2
BRCA2	32911349GA>G	2858del	E953fs	frameshift variant	rs886040450	pathogenic	PATHOGENIC	PVS1 | PS1 | PM2 | PP5	HRD deficient
BRCA2	32911352G>T	2860G>T	E954*	stop gained	rs1555282911	pathogenic	PATHOGENIC	PVS1 | PS1 | PM2 | PP5	HRD deficient
BRCA2	32911354G>A	2862G>A	E954=	synonymous codon	rs752137159	likely benign	VUS	PM2
BRCA2	32911361AA>A	2870del	N957fs	frameshift variant	rs397507645	pathogenic	PATHOGENIC	PVS1 | PS1 | PM2 | PP5	HRD deficient
BRCA2	32911371AG>A	2880del	K960fs	frameshift variant	rs886040451	pathogenic	PATHOGENIC	PVS1 | PS1 | PM2 | PP5	HRD deficient
BRCA2	32911373C>T	2881C>T	Q961*	stop gained	rs80358538	pathogenic	PATHOGENIC	PVS1 | PS1 | PM2 | PP5	HRD deficient
BRCA2	32911375G>A	2883G>A	Q961=	synonymous codon	rs11571655	benign	LIKELY BENIGN	BS1 | BP6
BRCA2	32911378T>C	2886T>C	H962=	synonymous codon	rs786202807	likely benign	VUS	PM2
BRCA2	32911388A>AA	2896dup	T966fs	frameshift variant	rs886040452	pathogenic	PATHOGENIC	PVS1 | PS1 | PM2 | PP5	HRD deficient
BRCA2	32911388ACT>A	2899_2900del	L967fs	frameshift variant	rs80359361	pathogenic	PATHOGENIC	PVS1 | PS1 | PM2 | PP5	HRD deficient
BRCA2	32911390T>C	2898T>C	T966=	synonymous codon	rs786202376	likely benign	VUS	PM2
BRCA2	32911391C>T	2899C>T	L967=	synonymous codon	rs80358539	likely benign	VUS	PM2
BRCA2	32911397C>T	2905C>T	Q969*	stop gained	rs886038080	pathogenic	PATHOGENIC	PVS1 | PS1 | PM2 | PP5	HRD deficient
BRCA2	32911404T>G	2912T>G	L971*	stop gained	rs397507647	pathogenic	PATHOGENIC	PVS1 | PS1 | PM2 | PP5	HRD deficient
BRCA2	32911410C>A	2918C>A	S973*	stop gained	rs397507296	pathogenic	PATHOGENIC	PVS1 | PS1 | PM2 | PP5	HRD deficient
BRCA2	32911411G>A	2919G>A	S973=	synonymous codon	rs45525041	benign	LIKELY BENIGN	BS1 | BP6
BRCA2	32911421T>C	2929T>C	L977=	synonymous codon	rs876660517	likely benign	VUS	PM2
BRCA2	32911421TTGAATATAGAT>T	2930_2940del	L977*	stop gained	rs80359364	pathogenic	PATHOGENIC	PVS1 | PS1 | PM2 | PP5	HRD deficient
BRCA2	32911436AT>A	2945del	I982fs	frameshift variant	rs886040453	pathogenic	PATHOGENIC	PVS1 | PS1 | PM2 | PP5	HRD deficient
BRCA2	32911441A>G	2949A>G	P983=	synonymous codon	rs762378787	likely benign	VUS	PM2
BRCA2	32911442G>T	2950G>T	E984*	stop gained	rs397507648	pathogenic	PATHOGENIC	PVS1 | PS1 | PM2 | PP5	HRD deficient
BRCA2	32911445AAAAA>A	2954_2957del	K985fs	frameshift variant	rs80359365	pathogenic	PATHOGENIC	PVS1 | PS1 | PM2 | PP5	HRD deficient
BRCA2	32911448A>AG	2956_2957insG	N986fs	frameshift variant	rs1555282974	pathogenic	PATHOGENIC	PVS1 | PS1 | PM2 | PP5	HRD deficient
BRCA2	32911448AA>A	2957del	N986fs	frameshift variant	rs80359365	pathogenic	PATHOGENIC	PVS1 | PS1 | PM2 | PP5	HRD deficient
BRCA2	32911449A>AA	2957dup	N986fs	frameshift variant	rs80359365	pathogenic	PATHOGENIC	PVS1 | PS1 | PM2 | PP5	HRD deficient
BRCA2	32911449A>AG	2957_2958insG	N986fs	frameshift variant	rs1555282969	pathogenic	PATHOGENIC	PVS1 | PS1 | PM2 | PP5	HRD deficient
BRCA2	32911452A>AA	2960dup	N987fs	frameshift variant	rs886040455	pathogenic	PATHOGENIC	PVS1 | PS1 | PM2 | PP5	HRD deficient
BRCA2	32911452A>T	2960A>T	N987I	missense	rs2227944	benign	BENIGN	BA1 | BS3 | BP1 | BP4 | BP6	neutral
BRCA2	32911452AT>A	2961del	N987fs	frameshift variant	rs886038082	pathogenic	PATHOGENIC	PVS1 | PS1 | PM2 | PP5	HRD deficient
BRCA2	32911462GAACAAATGGGCAG>G	2971_2983del	N991fs	frameshift variant	rs886040456	pathogenic	PATHOGENIC	PVS1 | PS1 | PM2 | PP5	HRD deficient
BRCA2	32911463A>G	2971A>G	N991D	missense	rs1799944	benign	BENIGN	BA1 | BS3 | BP1 | BP4 | BP6	neutral
BRCA2	32911467AA>A	2976del	K992fs	frameshift variant	rs1060502391	pathogenic	PATHOGENIC	PVS1 | PS1 | PM2 | PP5	HRD deficient
BRCA2	32911470G>A	2978G>A	W993*	stop gained	rs80358543	pathogenic	PATHOGENIC	PVS1 | PS1 | PM2 | PP5	HRD deficient
BRCA2	32911471G>A	2979G>A	W993*	stop gained	rs80358544	pathogenic	PATHOGENIC	PVS1 | PS1 | PM2 | PP5	HRD deficient
BRCA2	32911475G>T	2983G>T	G995*	stop gained	rs886040457	pathogenic	PATHOGENIC	PVS1 | PS1 | PM2 | PP5	HRD deficient
BRCA2	32911480C>G	2988C>G	L996=	synonymous codon	rs758336001	likely benign	LIKELY BENIGN	BS1
BRCA2	32911482T>A	2990T>A	L997*	stop gained	rs397507649	pathogenic	PATHOGENIC	PVS1 | PS1 | PM2 | PP5	HRD deficient
BRCA2	32911482T>G	2990T>G	L997*	stop gained	rs397507649	pathogenic	PATHOGENIC	PVS1 | PS1 | PM2 | PP5	HRD deficient
BRCA2	32911486T>G	2994T>G	G998=	synonymous codon	rs756171672	likely benign	VUS	PM2
BRCA2	32911492T>A	3000T>A	I1000=	synonymous codon	rs587780649	likely benign	VUS	PM2
BRCA2	32911495A>T	3003A>T	S1001=	synonymous codon	rs786203591	likely benign	VUS	PM2
BRCA2	32911498TCA>T	3009_3010del	H1003fs	frameshift variant	rs397507300	pathogenic	PATHOGENIC	PVS1 | PS1 | PM2 | PP5	HRD deficient
BRCA2	32911501CA>C	3010del	S1004fs	frameshift variant	rs730881604	pathogenic	PATHOGENIC	PVS1 | PS1 | PM2 | PP5	HRD deficient
BRCA2	32911507T>TTT	3014_3015dup	G1006fs	frameshift variant	rs397507650	pathogenic	PATHOGENIC	PVS1 | PS1 | PM2 | PP5	HRD deficient
BRCA2	32911508G>T	3016G>T	G1006*	stop gained	rs886038083	pathogenic	PATHOGENIC	PVS1 | PS1 | PM2 | PP5	HRD deficient
BRCA2	32911509GA>G	3018del	G1007fs	frameshift variant	rs397507651	pathogenic	PATHOGENIC	PVS1 | PS1 | PM2 | PP5	HRD deficient
BRCA2	32911522A>G	3030A>G	R1010=	synonymous codon	rs1131692105	likely benign	VUS	PM2
BRCA2	32911523AC>A	3032del	T1011fs	frameshift variant	rs1064794550	pathogenic	PATHOGENIC	PVS1 | PS1 | PM2 | PP5	HRD deficient
BRCA2	32911527CTTCA>C	3036_3039del	S1013fs	frameshift variant	rs1555283011	pathogenic	PATHOGENIC	PVS1 | PS1 | PM2 | PP5	HRD deficient
BRCA2	32911535A>T	3043A>T	K1015*	stop gained	rs397507652	pathogenic	PATHOGENIC	PVS1 | PS1 | PM2 | PP5	HRD deficient
BRCA2	32911538G>T	3046G>T	E1016*	stop gained	rs748508287	pathogenic	PATHOGENIC	PVS1 | PS1 | PM2 | PP5	HRD deficient
BRCA2	32911542TC>T	3051del	K1018fs	frameshift variant	rs80359367	pathogenic	PATHOGENIC	PVS1 | PS1 | PM2 | PP5	HRD deficient
BRCA2	32911543C>T	3051C>T	I1017=	synonymous codon	rs786201561	likely benign	VUS	PM2
BRCA2	32911546G>A	3054G>A	K1018=	synonymous codon	rs368404583	likely benign	LIKELY BENIGN	BS1
BRCA2	32911546GCT>G	3059_3060del	S1020*	stop gained	rs876661270	pathogenic	PATHOGENIC	PVS1 | PS1 | PM2 | PP5	HRD deficient
BRCA2	32911547C>G	3055C>G	L1019V	missense	rs55638633	benign	BENIGN	BS1 | BS3 | BP1 | BP4 | BP6	neutral
BRCA2	32911551CTG>C	3060_3061del	E1021fs	frameshift variant	rs1064794821	pathogenic	PATHOGENIC	PVS1 | PS1 | PM2 | PP5	HRD deficient
BRCA2	32911553GAACAT>G	3067_3071del	N1023*	stop gained	rs80359369	pathogenic	PATHOGENIC	PVS1 | PS1 | PM2 | PP5	HRD deficient
BRCA2	32911558T>TT	3066dup	N1023*	stop gained	rs886040458	pathogenic	PATHOGENIC	PVS1 | PS1 | PM2 | PP5	HRD deficient
BRCA2	32911559AA>A	3068del	N1023fs	frameshift variant	rs80359368	pathogenic	PATHOGENIC	PVS1 | PS1 | PM2 | PP5	HRD deficient
BRCA2	32911559AACAT>A	3068_3071del	N1023fs	frameshift variant	rs1555283031	pathogenic	PATHOGENIC	PVS1 | PS1 | PM2 | PP5	HRD deficient
BRCA2	32911560A>AA	3068dup	N1023fs	frameshift variant	rs80359368	pathogenic	PATHOGENIC	PVS1 | PS1 | PM2 | PP5	HRD deficient
BRCA2	32911560AC>A	3069del	N1023fs	frameshift variant	rs876658555	pathogenic	PATHOGENIC	PVS1 | PS1 | PM2 | PP5	HRD deficient
BRCA2	32911565A>T	3073A>T	K1025*	stop gained	rs80358550	pathogenic	PATHOGENIC	PVS1 | PS1 | PM2 | PP5	HRD deficient
BRCA2	32911567GA>TT	3075_3076delinsTT	K1025_K1026delinsN*	stop gained	rs587779362	pathogenic	PATHOGENIC	PVS1 | PS1 | PP5	HRD deficient
BRCA2	32911568A>T	3076A>T	K1026*	stop gained	rs80358552	pathogenic	PATHOGENIC	PVS1 | PS1 | PM2 | PP5	HRD deficient
BRCA2	32911568AA>A	3077del	K1026fs	frameshift variant	rs1060502475	pathogenic	PATHOGENIC	PVS1 | PS1 | PM2 | PP5	HRD deficient
BRCA2	32911570G>A	3078G>A	K1026=	synonymous codon	rs762692063	likely benign	VUS	-
BRCA2	32911587AA>A	3096del	D1033fs	frameshift variant	rs1135401898	pathogenic	PATHOGENIC	PVS1 | PS1 | PM2 | PP5	HRD deficient
BRCA2	32911587AAGATATTGAAGAACA>AT	3096_3110delinsT	K1032fs	frameshift variant	rs397507655	pathogenic	PATHOGENIC	PVS1 | PS1 | PM2 | PP5	HRD deficient
BRCA2	32911592A>AA	3100dup	I1034fs	frameshift variant	rs886040460	pathogenic	PATHOGENIC	PVS1 | PS1 | PM2 | PP5	HRD deficient
BRCA2	32911595G>T	3103G>T	E1035*	stop gained	rs80358556	pathogenic	PATHOGENIC	PVS1 | PS1 | PM2 | PP5	HRD deficient
BRCA2	32911598G>T	3106G>T	E1036*	stop gained	rs1060502449	pathogenic	PATHOGENIC	PVS1 | PS1 | PM2 | PP5	HRD deficient
BRCA2	32911601C>T	3109C>T	Q1037*	stop gained	rs80358557	pathogenic	PATHOGENIC	PVS1 | PS1 | PM2 | PP5	HRD deficient
BRCA2	32911603A>G	3111A>G	Q1037=	synonymous codon	rs786202967	likely benign	VUS	PM2
BRCA2	32911612T>A	3120T>A	T1040=	synonymous codon	rs150534625	likely benign	VUS	-
BRCA2	32911637AA>A	3146del	N1049fs	frameshift variant	rs80359370	pathogenic	PATHOGENIC	PVS1 | PS1 | PM2 | PP5	HRD deficient
BRCA2	32911641CCTTG>CATTTT	3150_3153delinsATTTT	L1051fs	frameshift variant	rs886040461	pathogenic	PATHOGENIC	PVS1 | PM2 | PP5	HRD deficient
BRCA2	32911648A>C	3156A>C	A1052=	synonymous codon	rs797044975	benign	LIKELY BENIGN	BS3 | BP6 | PM2	neutral
BRCA2	32911648ATTAGATAATCAA>AAG	3157_3168delinsAG	L1053fs	frameshift variant	rs1555283070	pathogenic	PATHOGENIC	PVS1 | PS1 | PM2 | PP5	HRD deficient
BRCA2	32911650T>G	3158T>G	L1053*	stop gained	rs41293477	pathogenic	PATHOGENIC	PVS1 | PS1 | PM2 | PP5	HRD deficient
BRCA2	32911651AGATA>A	3160_3163del	D1054fs	frameshift variant	rs80359371	pathogenic	PATHOGENIC	PVS1 | PS1 | PM2 | PP5	HRD deficient
BRCA2	32911658C>T	3166C>T	Q1056*	stop gained	rs79728106	pathogenic	PATHOGENIC	PVS1 | PS1 | PM2 | PP5	HRD deficient
BRCA2	32911658CAAAA>C	3167_3170del	Q1056fs	frameshift variant	rs80359372	pathogenic	PATHOGENIC	PVS1 | PS1 | PM2 | PP5	HRD deficient
BRCA2	32911661AA>A	3170del	K1057fs	frameshift variant	rs756083696	pathogenic	PATHOGENIC	PVS1 | PS1 | PM2 | PP5	HRD deficient
BRCA2	32911661AAGAAA>A	3170_3174del	K1057fs	frameshift variant	rs80359373	pathogenic	PATHOGENIC	PVS1 | PS1 | PM2 | PP5	HRD deficient
BRCA2	32911662AGA>A	3171_3172del	K1058fs	frameshift variant	rs886040463	pathogenic	PATHOGENIC	PVS1 | PS1 | PM2 | PP5	HRD deficient
BRCA2	32911664A>T	3172A>T	K1058*	stop gained	rs730881521	pathogenic	PATHOGENIC	PVS1 | PS1 | PM2 | PP5	HRD deficient
BRCA2	32911666AC>A	3175del	L1059*	stop gained	rs886038084	pathogenic	PATHOGENIC	PVS1 | PS1 | PM2 | PP5	HRD deficient
BRCA2	32911667CTG>C	3176_3177del	L1059fs	frameshift variant	rs587782022	pathogenic	PATHOGENIC	PVS1 | PS1 | PM2 | PP5	HRD deficient
BRCA2	32911672C>T	3180C>T	S1060=	synonymous codon	rs786203536	likely benign	VUS	PM2
BRCA2	32911673AA>A	3182del	K1061fs	frameshift variant	rs397507304	pathogenic	PATHOGENIC	PVS1 | PS1 | PM2 | PP5	HRD deficient
BRCA2	32911679C>T	3187C>T	Q1063*	stop gained	rs876657678	pathogenic	PATHOGENIC	PVS1 | PS1 | PM2 | PP5	HRD deficient
BRCA2	32911680AGTCA>A	3189_3192del	S1064fs	frameshift variant	rs80359374	pathogenic	PATHOGENIC	PVS1 | PS1 | PM2 | PP5	HRD deficient
BRCA2	32911683C>A	3191C>A	S1064*	stop gained	rs864622609	pathogenic	PATHOGENIC	PVS1 | PS1 | PM2 | PP5	HRD deficient
BRCA2	32911683C>G	3191C>G	S1064*	stop gained	rs864622609	pathogenic	PATHOGENIC	PVS1 | PS1 | PM2 | PP5	HRD deficient
BRCA2	32911686TT>T	3195del	N1066fs	frameshift variant	rs397507657	pathogenic	PATHOGENIC	PVS1 | PS1 | PM2 | PP5	HRD deficient
BRCA2	32911686TTAAT>T	3195_3198del	N1066fs	frameshift variant	rs80359375	pathogenic	PATHOGENIC	PVS1 | PS1 | PM2 | PP5	HRD deficient
BRCA2	32911690TA>T	3199del	T1067fs	frameshift variant	rs80359377	pathogenic	PATHOGENIC	PVS1 | PS1 | PM2 | PP5	HRD deficient
BRCA2	32911692CT>C	3201del	V1068fs	frameshift variant	rs864622672	pathogenic	PATHOGENIC	PVS1 | PS1 | PM2 | PP5	HRD deficient
BRCA2	32911693TG>T	3202del	V1068fs	frameshift variant	rs397507658	pathogenic	PATHOGENIC	PVS1 | PS1 | PM2 | PP5	HRD deficient
BRCA2	32911697T>TAATTGCAGTCAATTAATAT	3205_3206insAATTGCAGTCAATTAATAT	S1069*	stop gained	rs1555283098	pathogenic	PATHOGENIC	PVS1 | PS1 | PM2 | PP5	HRD deficient
BRCA2	32911702A>G	3210A>G	A1070=	synonymous codon	rs876659104	likely benign	VUS	PM2
BRCA2	32911705T>C	3213T>C	H1071=	synonymous codon	rs863224304	likely benign	VUS	PM2
BRCA2	32911709C>T	3217C>T	Q1073*	stop gained	rs886040464	pathogenic	PATHOGENIC	PVS1 | PS1 | PM2 | PP5	HRD deficient
BRCA2	32911711G>A	3219G>A	Q1073=	synonymous codon	rs753935319	likely benign	LIKELY BENIGN	BS1
BRCA2	32911712AGTAGT>A	3226_3230del	V1076fs	frameshift variant	rs397507659	pathogenic	PATHOGENIC	PVS1 | PS1 | PM2 | PP5	HRD deficient
BRCA2	32911713GTAGT>G	3222_3225del	S1074fs	frameshift variant	rs1135401899	pathogenic	PATHOGENIC	PVS1 | PS1 | PM2 | PP5	HRD deficient
BRCA2	32911717T>C	3225T>C	S1075=	synonymous codon	rs779228375	likely benign	VUS	-
BRCA2	32911719TAG>T	3228_3229del	V1077fs	frameshift variant	rs80359378	pathogenic	PATHOGENIC	PVS1 | PS1 | PM2 | PP5	HRD deficient
BRCA2	32911726TT>T	3235del	S1079fs	frameshift variant	rs397507660	pathogenic	PATHOGENIC	PVS1 | PS1 | PM2 | PP5	HRD deficient
BRCA2	32911736A>T	3244A>T	K1082*	stop gained	rs886040465	pathogenic	PATHOGENIC	PVS1 | PS1 | PM2 | PP5	HRD deficient
BRCA2	32911739AA>A	3248del	N1083fs	frameshift variant	rs886040466	pathogenic	PATHOGENIC	PVS1 | PS1 | PM2 | PP5	HRD deficient
BRCA2	32911740A>AA	3248dup	N1083fs	frameshift variant	rs886040466	pathogenic	PATHOGENIC	PVS1 | PS1 | PM2 | PP5	HRD deficient
BRCA2	32911741T>C	3249T>C	N1083=	synonymous codon	rs876659029	likely benign	VUS	PM2
BRCA2	32911744T>C	3252T>C	S1084=	synonymous codon	rs1060502412	likely benign	VUS	PM2
BRCA2	32911746ATA>A	3257_3258del	I1086fs	frameshift variant	rs876658618	pathogenic	PATHOGENIC	PVS1 | PS1 | PM2 | PP5	HRD deficient
BRCA2	32911753CCC>C	3262_3263del	P1088fs	frameshift variant	rs80359379	pathogenic	PATHOGENIC	PVS1 | PS1 | PM2 | PP5	HRD deficient
BRCA2	32911755C>CC	3263dup	Q1089fs	frameshift variant	rs80359379	pathogenic	PATHOGENIC	PVS1 | PS1 | PM2 | PP5	HRD deficient
BRCA2	32911756T>C	3264T>C	P1088=	synonymous codon	rs36060526	benign	BENIGN	BA1 | BP6	neutral
BRCA2	32911756T>TT	3264dup	Q1089fs	frameshift variant	rs80359380	pathogenic	PATHOGENIC	PVS1 | PS1 | PP5	HRD deficient
BRCA2	32911756T>TTT	3264_3265insTT	Q1089fs	frameshift variant	rs80359380	pathogenic	PATHOGENIC	PVS1 | PS1 | PM2 | PP5	HRD deficient
BRCA2	32911757C>T	3265C>T	Q1089*	stop gained	rs80358573	pathogenic	PATHOGENIC	PVS1 | PS1 | PM2 | PP5	HRD deficient
BRCA2	32911758AGA>A	3267_3268del	Q1089fs	frameshift variant	rs397507661	pathogenic	PATHOGENIC	PVS1 | PS1 | PM2 | PP5	HRD deficient
BRCA2	32911760AT>A	3269del	M1090fs	frameshift variant	rs80359381	pathogenic	PATHOGENIC	PVS1 | PS1 | PM2 | PP5	HRD deficient
BRCA2	32911764T>A	3272T>A	L1091*	stop gained	rs1064795577	pathogenic	PATHOGENIC	PVS1 | PS1 | PM2 | PP5	HRD deficient
BRCA2	32911764TATTT>T	3273_3276del	L1091fs	frameshift variant	rs80359382	pathogenic	PATHOGENIC	PVS1 | PS1 | PM2 | PP5	HRD deficient
BRCA2	32911768TT>T	3277del	S1093fs	frameshift variant	rs276174833	pathogenic	PATHOGENIC	PVS1 | PS1 | PM2 | PP5	HRD deficient
BRCA2	32911772A>T	3280A>T	K1094*	stop gained	rs690016539	pathogenic	PATHOGENIC	PVS1 | PS1 | PM2 | PP5	HRD deficient
BRCA2	32911774GC>G	3283del	Q1095fs	frameshift variant	rs886040468	pathogenic	PATHOGENIC	PVS1 | PS1 | PM2 | PP5	HRD deficient
BRCA2	32911775C>T	3283C>T	Q1095*	stop gained	rs397507662	pathogenic	PATHOGENIC	PVS1 | PS1 | PM2 | PP5	HRD deficient
BRCA2	32911783T>TT	3291dup	N1098*	stop gained	rs690016540	pathogenic	PATHOGENIC	PVS1 | PS1 | PM2 | PP5	HRD deficient
BRCA2	32911784AA>A	3293del	N1098fs	frameshift variant	rs690016541	pathogenic	PATHOGENIC	PVS1 | PS1 | PM2 | PP5	HRD deficient
BRCA2	32911786TT>T	3295del	S1099fs	frameshift variant	rs80359383	pathogenic	PATHOGENIC	PVS1 | PS1 | PM2 | PP5	HRD deficient
BRCA2	32911788C>A	3296C>A	S1099*	stop gained	rs397507663	pathogenic	PATHOGENIC	PVS1 | PS1 | PM2 | PP5	HRD deficient
BRCA2	32911788C>G	3296C>G	S1099*	stop gained	rs397507663	pathogenic	PATHOGENIC	PVS1 | PS1 | PM2 | PP5	HRD deficient
BRCA2	32911796A>T	3304A>T	N1102Y	missense	rs28897719	benign	LIKELY BENIGN	BS3 | BP1 | BP4 | BP6	neutral
BRCA2	32911799TT>T	3308del	L1103*	stop gained	rs1555283160	pathogenic	PATHOGENIC	PVS1 | PS1 | PM2 | PP5	HRD deficient
BRCA2	32911800T>G	3308T>G	L1103*	stop gained	rs397507305	pathogenic	PATHOGENIC	PVS1 | PS1 | PM2 | PP5	HRD deficient
BRCA2	32911800T>TTT	3307_3308dup	L1103fs	frameshift variant	rs1555283160	pathogenic	PATHOGENIC	PVS1 | PS1 | PM2 | PP5	HRD deficient
BRCA2	32911801A>G	3309A>G	L1103=	synonymous codon	rs786203980	likely benign	VUS	PM2
BRCA2	32911811C>T	3319C>T	Q1107*	stop gained	rs80358578	pathogenic	PATHOGENIC	PVS1 | PS1 | PM2 | PP5	HRD deficient
BRCA2	32911814A>T	3322A>T	K1108*	stop gained	rs1555283169	pathogenic	PATHOGENIC	PVS1 | PS1 | PM2 | PP5	HRD deficient
BRCA2	32911814AA>A	3323del	K1108fs	frameshift variant	rs869320782	pathogenic	PATHOGENIC	PVS1 | PS1 | PM2 | PP5	HRD deficient
BRCA2	32911817GC>G	3326del	A1109fs	frameshift variant	rs398122762	pathogenic	PATHOGENIC	PVS1 | PS1 | PM2 | PP5	HRD deficient
BRCA2	32911819A>G	3327A>G	A1109=	synonymous codon	rs864622176	likely benign	VUS	PM2
BRCA2	32911820G>T	3328G>T	E1110*	stop gained	rs1555283173	pathogenic	PATHOGENIC	PVS1 | PS1 | PM2 | PP5	HRD deficient
BRCA2	32911822A>G	3330A>G	E1110=	synonymous codon	rs369294255	likely benign	VUS	PM2
BRCA2	32911825T>A	3333T>A	I1111=	synonymous codon	rs878853566	likely benign	VUS	PM2
BRCA2	32911826AC>A	3335del	T1112fs	frameshift variant	rs886040470	pathogenic	PATHOGENIC	PVS1 | PS1 | PM2 | PP5	HRD deficient
BRCA2	32911827CA>C	3336del	E1113fs	frameshift variant	rs398122763	pathogenic	PATHOGENIC	PVS1 | PS1 | PM2 | PP5	HRD deficient
BRCA2	32911828A>ATAATTTAACACCTAGCCAAAAGGCAGAAATTACA	3303_3336dup	E1113*	stop gained	rs886040469	pathogenic	PATHOGENIC	PVS1 | PS1 | PM2 | PP5	HRD deficient
BRCA2	32911828AGA>A	3337_3338del	E1113fs	frameshift variant	rs886040471	pathogenic	PATHOGENIC	PVS1 | PS1 | PM2 | PP5	HRD deficient
BRCA2	32911834TT>T	3343del	S1115fs	frameshift variant	rs1555283184	pathogenic	PATHOGENIC	PVS1 | PS1 | PM2 | PP5	HRD deficient
BRCA2	32911835TC>T	3344del	S1115fs	frameshift variant	rs1135401900	pathogenic	PATHOGENIC	PVS1 | PS1 | PM2 | PP5	HRD deficient
BRCA2	32911837TAC>T	3346_3347del	T1116fs	frameshift variant	rs886040472	pathogenic	PATHOGENIC	PVS1 | PS1 | PM2 | PP5	HRD deficient
BRCA2	32911838A>ATA	3345_3346dup	T1116fs	frameshift variant	rs1555283186	pathogenic	PATHOGENIC	PVS1 | PS1 | PM2 | PP5	HRD deficient
BRCA2	32911840TA>T	3349del	I1117fs	frameshift variant	rs878853567	pathogenic	PATHOGENIC	PVS1 | PS1 | PM2 | PP5	HRD deficient
BRCA2	32911842TA>T	3351del	L1118*	stop gained	rs587781436	pathogenic	PATHOGENIC	PVS1 | PS1 | PM2 | PP5	HRD deficient
BRCA2	32911843A>T	3351A>T	I1117=	synonymous codon	rs730881522	likely benign	VUS	PM2
BRCA2	32911843ATTAGA>A	3352_3356del	L1118fs	frameshift variant	rs397507664	pathogenic	PATHOGENIC	PVS1 | PS1 | PM2 | PP5	HRD deficient
BRCA2	32911844TTAG>T	3353_3355del	L1118*	stop gained	rs786203329	pathogenic	PATHOGENIC	PVS1 | PS1 | PM2 | PP5	HRD deficient
BRCA2	32911845TA>T	3354del	E1119fs	frameshift variant	rs80359384	pathogenic	PATHOGENIC	PVS1 | PS1 | PM2 | PP5	HRD deficient
BRCA2	32911846A>G	3354A>G	L1118=	synonymous codon	rs786203378	likely benign	VUS	PM2
BRCA2	32911849AG>A	3358del	E1120fs	frameshift variant	rs587782672	pathogenic	PATHOGENIC	PVS1 | PS1 | PM2 | PP5	HRD deficient
BRCA2	32911854C>A	3362C>A	S1121*	stop gained	rs80358579	pathogenic	PATHOGENIC	PVS1 | PS1 | PM2 | PP5	HRD deficient
BRCA2	32911854C>G	3362C>G	S1121*	stop gained	rs80358579	pathogenic	PATHOGENIC	PVS1 | PS1 | PM2 | PP5	HRD deficient
BRCA2	32911856GG>G	3365del	G1122fs	frameshift variant	rs786202160	pathogenic	PATHOGENIC	PVS1 | PS1 | PM2 | PP5	HRD deficient
BRCA2	32911857GAA>G	3366_3367del	Q1124fs	frameshift variant	rs397507665	pathogenic	PATHOGENIC	PVS1 | PS1 | PM2 | PP5	HRD deficient
BRCA2	32911868G>T	3376G>T	E1126*	stop gained	rs1555283206	pathogenic	PATHOGENIC	PVS1 | PS1 | PM2 | PP5	HRD deficient
BRCA2	32911872TT>T	3381del	F1127fs	frameshift variant	rs397507666	pathogenic	PATHOGENIC	PVS1 | PS1 | PM2 | PP5	HRD deficient
BRCA2	32911876T>C	3384T>C	T1128=	synonymous codon	rs876658596	likely benign	VUS	PM2
BRCA2	32911878A>AA	3386dup	F1130fs	frameshift variant	rs431825305	pathogenic	PATHOGENIC	PVS1 | PS1 | PM2 | PP5	HRD deficient
BRCA2	32911881TT>T	3390del	F1130fs	frameshift variant	rs886040473	pathogenic	PATHOGENIC	PVS1 | PS1 | PM2 | PP5	HRD deficient
BRCA2	32911885A>G	3393A>G	R1131=	synonymous codon	rs1131692123	likely benign	VUS	PM2
BRCA2	32911887AA>A	3396del	K1132fs	frameshift variant	rs876658427	pathogenic	PATHOGENIC	PVS1 | PS1 | PM2 | PP5	HRD deficient
BRCA2	32911888A>G	3396A>G	K1132=	synonymous codon	rs1801406	benign	BENIGN	BA1 | BP6	neutral
BRCA2	32911897C>A	3405C>A	Y1135*	stop gained	rs876659258	pathogenic	PATHOGENIC	PVS1 | PS1 | PM2 | PP5	HRD deficient
BRCA2	32911900ATTGCAGAAGAGTA>A	3409_3421del	L1137fs	frameshift variant	rs886040474	pathogenic	PATHOGENIC	PVS1 | PS1 | PM2 | PP5	HRD deficient
BRCA2	32911903G>GG	3411dup	Q1138fs	frameshift variant	rs587781850	pathogenic	PATHOGENIC	PVS1 | PS1 | PM2 | PP5	HRD deficient
BRCA2	32911904C>T	3412C>T	Q1138*	stop gained	rs587782613	pathogenic	PATHOGENIC	PVS1 | PS1 | PM2 | PP5	HRD deficient
BRCA2	32911909G>A	3417G>A	K1139=	synonymous codon	rs145625991	likely benign	LIKELY BENIGN	BS1
BRCA2	32911912T>C	3420T>C	S1140=	synonymous codon	rs118093942	benign	LIKELY BENIGN	BS1 | BP6
BRCA2	32911913AC>A	3422del	T1141fs	frameshift variant	rs879255311	pathogenic	PATHOGENIC	PVS1 | PS1 | PM2 | PP5	HRD deficient
BRCA2	32911918T>C	3426T>C	F1142=	synonymous codon	rs760681272	likely benign	VUS	PM2
BRCA2	32911924G>C	3432G>C	V1144=	synonymous codon	rs775407297	likely benign	VUS	PM2
BRCA2	32911928G>T	3436G>T	E1146*	stop gained	rs1237049560	pathogenic	PATHOGENIC	PVS1 | PS1 | PM2 | PP5	HRD deficient
BRCA2	32911934C>T	3442C>T	Q1148*	stop gained	rs397507667	pathogenic	PATHOGENIC	PVS1 | PS1 | PM2 | PP5	HRD deficient
BRCA2	32911940A>AAG	3448_3449insAG	T1150fs	frameshift variant	rs1555283245	pathogenic	PATHOGENIC	PVS1 | PS1 | PM2 | PP5	HRD deficient
BRCA2	32911942T>TT	3450dup	I1151fs	frameshift variant	rs397507668	pathogenic	PATHOGENIC	PVS1 | PS1 | PM2 | PP5	HRD deficient
BRCA2	32911942TAT>T	3451_3452del	I1151fs	frameshift variant	rs886040475	pathogenic	PATHOGENIC	PVS1 | PS1 | PM2 | PP5	HRD deficient
BRCA2	32911944T>TT	3452dup	T1154fs	frameshift variant	rs397507669	pathogenic	PATHOGENIC	PVS1 | PS1 | PM2 | PP5	HRD deficient
BRCA2	32911944TC>T	3453del	L1152*	stop gained	rs397507670	pathogenic	PATHOGENIC	PVS1 | PS1 | PM2 | PP5	HRD deficient
BRCA2	32911945CTT>C	3454_3455del	L1152fs	frameshift variant	rs1555283251	pathogenic	PATHOGENIC	PVS1 | PS1 | PM2 | PP5	HRD deficient
BRCA2	32911947T>A	3455T>A	L1152*	stop gained	rs80358593	pathogenic	PATHOGENIC	PVS1 | PS1 | PM2 | PP5	HRD deficient
BRCA2	32911947T>G	3455T>G	L1152*	stop gained	rs80358593	pathogenic	PATHOGENIC	PVS1 | PS1 | PM2 | PP5	HRD deficient
BRCA2	32911947T>TT	3455dup	L1152fs	frameshift variant	rs80359385	pathogenic	PATHOGENIC	PVS1 | PS1 | PM2 | PP5	HRD deficient
BRCA2	32911949AA>A	3458del	K1153fs	frameshift variant	rs80359386	pathogenic	PATHOGENIC	PVS1 | PS1 | PM2 | PP5	HRD deficient
BRCA2	32911954C>G	3462C>G	T1154=	synonymous codon	rs4986856	likely benign	LIKELY BENIGN	BS1
BRCA2	32911954C>T	3462C>T	T1154=	synonymous codon	rs4986856	likely benign	LIKELY BENIGN	BS1
BRCA2	32911956CTT>C	3465_3466del	S1156*	stop gained	rs397507671	pathogenic	PATHOGENIC	PVS1 | PS1 | PM2 | PP5	HRD deficient
BRCA2	32911961G>T	3469G>T	E1157*	stop gained	rs80358595	pathogenic	PATHOGENIC	PVS1 | PS1 | PM2 | PP5	HRD deficient
BRCA2	32911969C>A	3477C>A	C1159*	stop gained	rs431825307	pathogenic	PATHOGENIC	PVS1 | PS1 | PM2 | PP5	HRD deficient
BRCA2	32911969CAGAG>CTGAGGA	3478_3481delinsTGAGGA	R1160*	stop gained	rs1064792961	pathogenic	PATHOGENIC	PVS1 | PM2 | PP5	HRD deficient
BRCA2	32911970AGA>A	3481_3482del	D1161fs	frameshift variant	rs878853569	pathogenic	PATHOGENIC	PVS1 | PS1 | PM2 | PP5	HRD deficient
BRCA2	32911972AGATGCTGATCT>A	3481_3491del	D1161fs	frameshift variant	rs1555283262	pathogenic	PATHOGENIC	PVS1 | PS1 | PM2 | PP5	HRD deficient
BRCA2	32911978TG>T	3487del	D1163fs	frameshift variant	rs397507672	pathogenic	PATHOGENIC	PVS1 | PS1 | PM2 | PP5	HRD deficient
BRCA2	32911980AT>A	3489del	L1164fs	frameshift variant	rs886040476	pathogenic	PATHOGENIC	PVS1 | PS1 | PM2 | PP5	HRD deficient
BRCA2	32911984T>TT	3492dup	H1165fs	frameshift variant	rs886040477	pathogenic	PATHOGENIC	PVS1 | PS1 | PM2 | PP5	HRD deficient
BRCA2	32911987T>C	3495T>C	H1165=	synonymous codon	rs776655838	benign	LIKELY BENIGN	BS1 | BP6
BRCA2	32911988GT>G	3497del	V1166fs	frameshift variant	rs886040478	pathogenic	PATHOGENIC	PVS1 | PS1 | PM2 | PP5	HRD deficient
BRCA2	32911991ATA>A	3500_3501del	I1167fs	frameshift variant	rs80359387	pathogenic	PATHOGENIC	PVS1 | PS1 | PM2 | PP5	HRD deficient
BRCA2	32911994A>AA	3502dup	M1168fs	frameshift variant	rs886040479	pathogenic	PATHOGENIC	PVS1 | PS1 | PM2 | PP5	HRD deficient
BRCA2	32912007C>A	3515C>A	S1172*	stop gained	rs80358600	pathogenic	PATHOGENIC	PVS1 | PS1 | PM2 | PP5	HRD deficient
BRCA2	32912007C>T	3515C>T	S1172L	missense	rs80358600	benign	BENIGN	BA1 | BS3 | BP1 | BP4 | BP6	neutral
BRCA2	32912008G>A	3516G>A	S1172=	synonymous codon	rs1799952	benign	LIKELY BENIGN	BS1 | BP6
BRCA2	32912008G>T	3516G>T	S1172=	synonymous codon	rs1799952	likely benign	VUS	PM2
BRCA2	32912015C>T	3523C>T	Q1175*	stop gained	rs886040480	pathogenic	PATHOGENIC	PVS1 | PS1 | PM2 | PP5	HRD deficient
BRCA2	32912017G>A	3525G>A	Q1175=	synonymous codon	rs876658812	likely benign	VUS	PM2
BRCA2	32912021GACAG>G	3530_3533del	D1177fs	frameshift variant	rs886040481	pathogenic	PATHOGENIC	PVS1 | PS1 | PM2 | PP5	HRD deficient
BRCA2	32912022ACAGC>A	3531_3534del	D1177fs	frameshift variant	rs397507673	pathogenic	PATHOGENIC	PVS1 | PS1 | PM2 | PP5	HRD deficient
BRCA2	32912036TTT>T	3545_3546del	F1182*	stop gained	rs80359388	pathogenic	PATHOGENIC	PVS1 | PS1 | PP5	HRD deficient
BRCA2	32912037TT>T	3546del	F1182fs	frameshift variant	rs80359388	pathogenic	PATHOGENIC	PVS1 | PS1 | PM2 | PP5	HRD deficient
BRCA2	32912045ACA>A	3554_3555del	T1185fs	frameshift variant	rs80359389	pathogenic	PATHOGENIC	PVS1 | PS1 | PM2 | PP5	HRD deficient
BRCA2	32912045ACAGTTGAAAT>A	3554_3563del	T1185fs	frameshift variant	rs397507675	pathogenic	PATHOGENIC	PVS1 | PS1 | PM2 | PP5	HRD deficient
BRCA2	32912047A>G	3555A>G	T1185=	synonymous codon	rs876659609	likely benign	VUS	PM2
BRCA2	32912047AGTTGAAATTA>A	3556_3565del	V1186fs	frameshift variant	rs397507676	pathogenic	PATHOGENIC	PVS1 | PS1 | PM2 | PP5	HRD deficient
BRCA2	32912055TTAAA>T	3564_3567del	K1189fs	frameshift variant	rs886040483	pathogenic	PATHOGENIC	PVS1 | PS1 | PM2 | PP5	HRD deficient
BRCA2	32912060C>T	3568C>T	R1190W	missense	rs80358604	benign	BENIGN	BS1 | BS3 | BP1 | BP4 | BP6	neutral
BRCA2	32912061GG>G	3570del	K1191fs	frameshift variant	rs80359390	pathogenic	PATHOGENIC	PVS1 | PS1 | PM2 | PP5	HRD deficient
BRCA2	32912073G>A	3581G>A	G1194D	missense	rs28897721	benign	BENIGN	BS1 | BS3 | BP1 | BP4 | BP6	neutral
BRCA2	32912074C>G	3582C>G	G1194=	synonymous codon	rs746734303	likely benign	VUS	PM2
BRCA2	32912084AA>A	3593del	N1198fs	frameshift variant	rs397507677	pathogenic	PATHOGENIC	PVS1 | PS1 | PM2 | PP5	HRD deficient
BRCA2	32912085A>AA	3593dup	N1198fs	frameshift variant	rs397507677	pathogenic	PATHOGENIC	PVS1 | PS1 | PM2 | PP5	HRD deficient
BRCA2	32912087GACTG>G	3596_3599del	D1199fs	frameshift variant	rs886040484	pathogenic	PATHOGENIC	PVS1 | PS1 | PM2 | PP5	HRD deficient
BRCA2	32912089C>T	3597C>T	D1199=	synonymous codon	rs192892005	likely benign	VUS	PM2
BRCA2	32912090TG>T	3599del	C1200fs	frameshift variant	rs886038089	pathogenic	PATHOGENIC	PVS1 | PS1 | PM2 | PP5	HRD deficient
BRCA2	32912090TGT>T	3599_3600del	C1200*	stop gained	rs80359391	pathogenic	PATHOGENIC	PVS1 | PS1 | PP5	HRD deficient
BRCA2	32912092T>C	3600T>C	C1200=	synonymous codon	rs786203359	likely benign	VUS	PM2
BRCA2	32912094AC>A	3603del	N1201fs	frameshift variant	rs886040485	pathogenic	PATHOGENIC	PVS1 | PS1 | PM2 | PP5	HRD deficient
BRCA2	32912104T>C	3612T>C	A1204=	synonymous codon	rs863224305	likely benign	VUS	PM2
BRCA2	32912107T>C	3615T>C	S1205=	synonymous codon	rs769677997	likely benign	VUS	PM2
BRCA2	32912122T>C	3630T>C	D1210=	synonymous codon	rs786202991	likely benign	LIKELY BENIGN	BS1
BRCA2	32912123G>T	3631G>T	E1211*	stop gained	rs886040486	pathogenic	PATHOGENIC	PVS1 | PS1 | PM2 | PP5	HRD deficient
BRCA2	32912127ATGAA>A	3636_3639del	N1212fs	frameshift variant	rs876659656	pathogenic	PATHOGENIC	PVS1 | PS1 | PM2 | PP5	HRD deficient
BRCA2	32912128TG>T	3637del	E1213fs	frameshift variant	rs886040487	pathogenic	PATHOGENIC	PVS1 | PS1 | PM2 | PP5	HRD deficient
BRCA2	32912130AA>A	3639del	V1214fs	frameshift variant	rs80359394	pathogenic	PATHOGENIC	PVS1 | PS1 | PM2 | PP5	HRD deficient
BRCA2	32912130AAGTGGGGTTTAGGG>A	3639_3652del	V1214fs	frameshift variant	rs886038091	pathogenic	PATHOGENIC	PVS1 | PS1 | PM2 | PP5	HRD deficient
BRCA2	32912132GT>G	3641del	V1214fs	frameshift variant	rs690016542	pathogenic	PATHOGENIC	PVS1 | PS1 | PM2 | PP5	HRD deficient
BRCA2	32912133T>TT	3641dup	F1216fs	frameshift variant	rs397507678	pathogenic	PATHOGENIC	PVS1 | PS1 | PM2 | PP5	HRD deficient
BRCA2	32912136GGT>GTAAAAAG	3645_3646delinsTAAAAAG	F1216fs	frameshift variant	rs397507679	pathogenic	PATHOGENIC	PVS1 | PS1 | PM2 | PP5	HRD deficient
BRCA2	32912136GGTT>GTA	3645_3647delinsTA	F1216fs	frameshift variant	rs1064793064	pathogenic	PATHOGENIC	PVS1 | PS1 | PM2 | PP5	HRD deficient
BRCA2	32912140TA>T	3649del	R1217fs	frameshift variant	rs864622134	pathogenic	PATHOGENIC	PVS1 | PS1 | PM2 | PP5	HRD deficient
BRCA2	32912149T>C	3657T>C	F1219=	synonymous codon	rs876658879	likely benign	VUS	PM2
BRCA2	32912158T>G	3666T>G	A1222=	synonymous codon	rs765890622	likely benign	LIKELY BENIGN	BS1
BRCA2	32912161T>C	3669T>C	H1223=	synonymous codon	rs878853572	likely benign	VUS	PM2
BRCA2	32912164C>T	3672C>T	G1224=	synonymous codon	rs587780650	likely benign	LIKELY BENIGN	BS1
BRCA2	32912167A>G	3675A>G	T1225=	synonymous codon	rs276174835	likely benign	VUS	PM2
BRCA2	32912171CTG>C	3680_3681del	L1227fs	frameshift variant	rs80359395	pathogenic	PATHOGENIC	PVS1 | PS1 | PP5 | BS1	HRD deficient
BRCA2	32912172TG>T	3681del	N1228fs	frameshift variant	rs886038092	pathogenic	PATHOGENIC	PVS1 | PS1 | PM2 | PP5	HRD deficient
BRCA2	32912173G>A	3681G>A	L1227=	synonymous codon	rs758007548	likely benign	VUS	PM2
BRCA2	32912173G>C	3681G>C	L1227=	synonymous codon	rs758007548	likely benign	LIKELY BENIGN	BS1
BRCA2	32912173GAATG>G	3682_3685del	N1228fs	frameshift variant	rs80359396	pathogenic	PATHOGENIC	PVS1 | PS1 | PM2 | PP5	HRD deficient
BRCA2	32912174A>G	3682A>G	N1228D	missense	rs28897722	benign	LIKELY BENIGN	BS3 | BP1 | BP4 | BP6	neutral
BRCA2	32912174AA>AGG	3683delinsGG	N1228fs	frameshift variant	rs1555283361	pathogenic	PATHOGENIC	PVS1 | PS1 | PM2 | PP5	HRD deficient
BRCA2	32912176TG>T	3685del	V1229fs	frameshift variant	rs80359397	pathogenic	PATHOGENIC	PVS1 | PS1 | PM2 | PP5	HRD deficient
BRCA2	32912176TGT>T	3685_3686del	V1229fs	frameshift variant	rs886040489	pathogenic	PATHOGENIC	PVS1 | PS1 | PM2 | PP5	HRD deficient
BRCA2	32912179TT>T	3688del	S1230fs	frameshift variant	rs878853573	pathogenic	PATHOGENIC	PVS1 | PS1 | PM2 | PP5	HRD deficient
BRCA2	32912180TC>T	3689del	S1230fs	frameshift variant	rs80359398	pathogenic	PATHOGENIC	PVS1 | PS1 | PM2 | PP5	HRD deficient
BRCA2	32912180TCT>T	3689_3690del	S1230fs	frameshift variant	rs869312759	pathogenic	PATHOGENIC	PVS1 | PS1 | PM2 | PP5	HRD deficient
BRCA2	32912185T>C	3693T>C	T1231=	synonymous codon	rs751232859	likely benign	VUS	PM2
BRCA2	32912200A>AA	3708dup	A1237fs	frameshift variant	rs34575057	pathogenic	PATHOGENIC	PVS1 | PS1 | PM2 | PP5	HRD deficient
BRCA2	32912201GC>G	3710del	A1237fs	frameshift variant	rs1555283371	pathogenic	PATHOGENIC	PVS1 | PS1 | PM2 | PP5	HRD deficient
BRCA2	32912203T>C	3711T>C	A1237=	synonymous codon	rs745588537	likely benign	VUS	-
BRCA2	32912203T>G	3711T>G	A1237=	synonymous codon	rs745588537	likely benign	VUS	PM2
BRCA2	32912206G>A	3714G>A	V1238=	synonymous codon	rs780000105	likely benign	LIKELY BENIGN	BS1
BRCA2	32912208AA>A	3717del	K1239fs	frameshift variant	rs80359401	pathogenic	PATHOGENIC	PVS1 | PS1 | PM2 | PP5	HRD deficient
BRCA2	32912209A>G	3717A>G	K1239=	synonymous codon	rs141196976	likely benign	VUS	-
BRCA2	32912211TGT>T	3720_3721del	F1241*	stop gained	rs1555283373	pathogenic	PATHOGENIC	PVS1 | PS1 | PM2 | PP5	HRD deficient
BRCA2	32912211TGTTT>T	3720_3723del	F1241fs	frameshift variant	rs886038093	pathogenic	PATHOGENIC	PVS1 | PS1 | PM2 | PP5	HRD deficient
BRCA2	32912212G>A	3720G>A	L1240=	synonymous codon	rs773240495	likely benign	VUS	PM2
BRCA2	32912214TT>T	3723del	F1241fs	frameshift variant	rs886040491	pathogenic	PATHOGENIC	PVS1 | PS1 | PM2 | PP5	HRD deficient
BRCA2	32912214TTAG>TAT	3723_3725delinsAT	F1241fs	frameshift variant	rs397507682	pathogenic	PATHOGENIC	PVS1 | PS1 | PM2 | PP5	HRD deficient
BRCA2	32912216A>AA	3724dup	S1242fs	frameshift variant	rs886040492	pathogenic	PATHOGENIC	PVS1 | PS1 | PM2 | PP5	HRD deficient
BRCA2	32912220A>AA	3728dup	D1243fs	frameshift variant	rs886040493	pathogenic	PATHOGENIC	PVS1 | PS1 | PM2 | PP5	HRD deficient
BRCA2	32912227G>A	3735G>A	E1245=	synonymous codon	rs878853574	likely benign	VUS	PM2
BRCA2	32912228AA>A	3737del	N1246fs	frameshift variant	rs80359402	pathogenic	PATHOGENIC	PVS1 | PS1 | PM2 | PP5	HRD deficient
BRCA2	32912230TA>T	3739del	I1247fs	frameshift variant	rs886040494	pathogenic	PATHOGENIC	PVS1 | PS1 | PM2 | PP5	HRD deficient
BRCA2	32912232TT>T	3741del	S1248fs	frameshift variant	rs886040495	pathogenic	PATHOGENIC	PVS1 | PS1 | PM2 | PP5	HRD deficient
BRCA2	32912235GTGAG>G	3744_3747del	S1248fs	frameshift variant	rs80359403	pathogenic	PATHOGENIC	PVS1 | PS1 | PM2 | PP5	HRD deficient
BRCA2	32912240G>T	3748G>T	E1250*	stop gained	rs80358615	pathogenic	PATHOGENIC	PVS1 | PS1 | PM2 | PP5	HRD deficient
BRCA2	32912243A>AA	3751dup	T1251fs	frameshift variant	rs397507683	pathogenic	PATHOGENIC	PVS1 | PS1 | PM2 | PP5	HRD deficient
BRCA2	32912254G>A	3762G>A	E1254=	synonymous codon	rs777028631	likely benign	VUS	PM2
BRCA2	32912263A>G	3771A>G	P1257=	synonymous codon	rs759855937	likely benign	LIKELY BENIGN	BS1
BRCA2	32912263AA>A	3772del	I1258*	stop gained	rs397507684	pathogenic	PATHOGENIC	PVS1 | PS1 | PM2 | PP5	HRD deficient
BRCA2	32912264ATA>A	3773_3774del	I1258fs	frameshift variant	rs397507685	pathogenic	PATHOGENIC	PVS1 | PS1 | PM2 | PP5	HRD deficient
BRCA2	32912265TAA>T	3774_3775del	I1258fs	frameshift variant	rs886038094	pathogenic	PATHOGENIC	PVS1 | PS1 | PM2 | PP5	HRD deficient
BRCA2	32912269TTT>T	3778_3779del	L1260fs	frameshift variant	rs397507686	pathogenic	PATHOGENIC	PVS1 | PS1 | PM2 | PP5	HRD deficient
BRCA2	32912270TT>T	3779del	L1260fs	frameshift variant	rs397507686	pathogenic	PATHOGENIC	PVS1 | PS1 | PM2 | PP5	HRD deficient
BRCA2	32912271T>TT	3779dup	L1260fs	frameshift variant	rs397507686	pathogenic	PATHOGENIC	PVS1 | PS1 | PM2 | PP5	HRD deficient
BRCA2	32912277C>G	3785C>G	S1262*	stop gained	rs80358620	pathogenic	PATHOGENIC	PVS1 | PS1 | PM2 | PP5	HRD deficient
BRCA2	32912281T>C	3789T>C	S1263=	synonymous codon	rs876659185	likely benign	VUS	PM2
BRCA2	32912285T>A	3793T>A	C1265S	missense	rs797044976	benign	LIKELY BENIGN	BS3 | BP1 | BP4 | BP6 | PM2	neutral
BRCA2	32912299T>C	3807T>C	V1269=	synonymous codon	rs543304	benign	BENIGN	BA1 | BP6	neutral
BRCA2	32912299T>G	3807T>G	V1269=	synonymous codon	rs543304	likely benign	VUS	PM2
BRCA2	32912299TGT>T	3808_3809del	V1270fs	frameshift variant	rs886038095	pathogenic	PATHOGENIC	PVS1 | PS1 | PM2 | PP5	HRD deficient
BRCA2	32912304C>A	3812C>A	S1271*	stop gained	rs80358623	pathogenic	PATHOGENIC	PVS1 | PS1 | PM2 | PP5	HRD deficient
BRCA2	32912304C>G	3812C>G	S1271*	stop gained	rs80358623	pathogenic	PATHOGENIC	PVS1 | PS1 | PM2 | PP5	HRD deficient
BRCA2	32912305A>AC	3813_3814insC	M1272fs	frameshift variant	rs1555283406	pathogenic	PATHOGENIC	PVS1 | PS1 | PM2 | PP5	HRD deficient
BRCA2	32912306A>AC	3814_3815insC	M1272fs	frameshift variant	rs886040497	pathogenic	PATHOGENIC	PVS1 | PS1 | PM2 | PP5	HRD deficient
BRCA2	32912311T>TT	3819dup	K1274*	stop gained	rs886040498	pathogenic	PATHOGENIC	PVS1 | PS1 | PM2 | PP5	HRD deficient
BRCA2	32912311TAAGA>T	3820_3823del	K1274*	stop gained	rs730881620	pathogenic	PATHOGENIC	PVS1 | PS1 | PM2 | PP5	HRD deficient
BRCA2	32912315ATAGA>A	3824_3827del	I1275fs	frameshift variant	rs397507688	pathogenic	PATHOGENIC	PVS1 | PS1 | PM2 | PP5	HRD deficient
BRCA2	32912320AAA>A	3829_3830del	N1277fs	frameshift variant	rs397507689	pathogenic	PATHOGENIC	PVS1 | PS1 | PM2 | PP5	HRD deficient
BRCA2	32912321AA>A	3830del	N1277fs	frameshift variant	rs397507689	pathogenic	PATHOGENIC	PVS1 | PS1 | PM2 | PP5	HRD deficient
BRCA2	32912325ATA>A	3834_3835del	H1278fs	frameshift variant	rs886037803	pathogenic	PATHOGENIC	PVS1 | PS1 | PM2 | PP5	HRD deficient
BRCA2	32912327AA>A	3836del	N1279fs	frameshift variant	rs397507690	pathogenic	PATHOGENIC	PVS1 | PS1 | PM2 | PP5	HRD deficient
BRCA2	32912328A>AA	3836dup	N1279fs	frameshift variant	rs397507690	pathogenic	PATHOGENIC	PVS1 | PS1 | PM2 | PP5	HRD deficient
BRCA2	32912328AT>A	3837del	N1279fs	frameshift variant	rs80359404	pathogenic	PATHOGENIC	PVS1 | PS1 | PM2 | PP5	HRD deficient
BRCA2	32912331A>T	3839A>T	D1280V	missense	rs56337919	benign	BENIGN	BS1 | BS3 | BP1 | BP4 | BP6	neutral
BRCA2	32912332T>C	3840T>C	D1280=	synonymous codon	rs786201327	likely benign	VUS	-
BRCA2	32912338TG>T	3847del	V1283*	stop gained	rs397507691	pathogenic	PATHOGENIC	PVS1 | PS1 | PM2 | PP5	HRD deficient
BRCA2	32912338TGT>T	3847_3848del	V1283fs	frameshift variant	rs80359405	pathogenic	PATHOGENIC	PVS1 | PS1 | PP5	HRD deficient
BRCA2	32912340T>TT	3848dup	S1284fs	frameshift variant	rs397507317	pathogenic	PATHOGENIC	PVS1 | PS1 | PM2 | PP5	HRD deficient
BRCA2	32912340TAAGT>T	3849_3852del	S1284fs	frameshift variant	rs397507692	pathogenic	PATHOGENIC	PVS1 | PS1 | PM2 | PP5	HRD deficient
BRCA2	32912341A>AT	3849_3850insT	S1284*	stop gained	rs886038096	pathogenic	PATHOGENIC	PVS1 | PS1 | PM2 | PP5	HRD deficient
BRCA2	32912348AAAAA>A	3857_3860del	K1286fs	frameshift variant	rs80359406	pathogenic	PATHOGENIC	PVS1 | PS1 | PM2 | PP5	HRD deficient
BRCA2	32912350AAA>A	3859_3860del	N1287*	stop gained	rs80359406	pathogenic	PATHOGENIC	PVS1 | PS1 | PM2 | PP5	HRD deficient
BRCA2	32912351AA>A	3860del	N1287fs	frameshift variant	rs80359406	pathogenic	PATHOGENIC	PVS1 | PS1 | PM2 | PP5	HRD deficient
BRCA2	32912351AATAA>A	3860_3863del	N1287fs	frameshift variant	rs80359410	pathogenic	PATHOGENIC	PVS1 | PS1 | PM2 | PP5	HRD deficient
BRCA2	32912352A>AA	3860dup	N1287fs	frameshift variant	rs80359406	pathogenic	PATHOGENIC	PVS1 | PS1 | PM2 | PP5	HRD deficient
BRCA2	32912352ATAAT>A	3861_3864del	N1287fs	frameshift variant	rs886040500	pathogenic	PATHOGENIC	PVS1 | PS1 | PM2 | PP5	HRD deficient
BRCA2	32912355A>AA	3863dup	N1288fs	frameshift variant	rs397507693	pathogenic	PATHOGENIC	PVS1 | PS1 | PM2 | PP5	HRD deficient
BRCA2	32912355ATA>A	3864_3865del	N1288fs	frameshift variant	rs886038098	pathogenic	PATHOGENIC	PVS1 | PS1 | PM2 | PP5	HRD deficient
BRCA2	32912356TAAAT>T	3865_3868del	K1289fs	frameshift variant	rs80359412	pathogenic	PATHOGENIC	PVS1 | PS1 | PM2 | PP5	HRD deficient
BRCA2	32912357AAA>A	3866_3867del	K1289fs	frameshift variant	rs397507694	pathogenic	PATHOGENIC	PVS1 | PS1 | PM2 | PP5	HRD deficient
BRCA2	32912357AAATG>A	3866_3869del	K1289fs	frameshift variant	rs886040501	pathogenic	PATHOGENIC	PVS1 | PS1 | PM2 | PP5	HRD deficient
BRCA2	32912359A>AA	3867dup	C1290fs	frameshift variant	rs397507694	pathogenic	PATHOGENIC	PVS1 | PS1 | PM2 | PP5	HRD deficient
BRCA2	32912360T>TAAT	3866_3868dup	C1290*	stop gained	rs1555283442	pathogenic	PATHOGENIC	PVS1 | PS1 | PM2 | PP5	HRD deficient
BRCA2	32912361G>A	3869G>A	C1290Y	missense	rs41293485	benign	BENIGN	BA1 | BP1 | BP4 | BP6	neutral
BRCA2	32912363C>T	3871C>T	Q1291*	stop gained	rs80358631	pathogenic	PATHOGENIC	PVS1 | PS1 | PP5	HRD deficient
BRCA2	32912364AA>A	3873del	Q1291fs	frameshift variant	rs398122772	pathogenic	PATHOGENIC	PVS1 | PS1 | PM2 | PP5	HRD deficient
BRCA2	32912366C>T	3874C>T	L1292=	synonymous codon	rs587780867	likely benign	VUS	-
BRCA2	32912372T>C	3880T>C	L1294=	synonymous codon	rs786201236	likely benign	VUS	-
BRCA2	32912372TT>T	3881del	L1294fs	frameshift variant	rs1064794921	pathogenic	PATHOGENIC	PVS1 | PS1 | PM2 | PP5	HRD deficient
BRCA2	32912373T>A	3881T>A	L1294*	stop gained	rs80358632	pathogenic	PATHOGENIC	PVS1 | PS1 | PM2 | PP5	HRD deficient
BRCA2	32912373T>G	3881T>G	L1294*	stop gained	rs80358632	pathogenic	PATHOGENIC	PVS1 | PS1 | PM2 | PP5	HRD deficient
BRCA2	32912375C>T	3883C>T	Q1295*	stop gained	rs879255309	pathogenic	PATHOGENIC	PVS1 | PS1 | PM2 | PP5	HRD deficient
BRCA2	32912377A>G	3885A>G	Q1295=	synonymous codon	rs876659864	likely benign	VUS	PM2
BRCA2	32912378AA>A	3887del	N1296fs	frameshift variant	rs397507695	pathogenic	PATHOGENIC	PVS1 | PS1 | PM2 | PP5	HRD deficient
BRCA2	32912386T>A	3894T>A	I1298=	synonymous codon	rs41293487	likely benign	VUS	PM2
BRCA2	32912401C>A	3909C>A	G1303=	synonymous codon	rs80359786	likely benign	VUS	PM2
BRCA2	32912402AC>A	3911del	T1304fs	frameshift variant	rs80359415	pathogenic	PATHOGENIC	PVS1 | PS1 | PM2 | PP5	HRD deficient
BRCA2	32912406TT>T	3915del	F1305fs	frameshift variant	rs397507698	pathogenic	PATHOGENIC	PVS1 | PS1 | PM2 | PP5	HRD deficient
BRCA2	32912408G>A	3916G>A	V1306I	missense	rs80358636	benign	LIKELY BENIGN	BS3 | BP1 | BP4 | BP6	neutral
BRCA2	32912410TG>T	3919del	E1307fs	frameshift variant	rs80359416	pathogenic	PATHOGENIC	PVS1 | PS1 | PM2 | PP5	HRD deficient
BRCA2	32912411GAAGAAATTACTGAAAATTACAA>G	3920_3941del	E1307fs	frameshift variant	rs886040503	pathogenic	PATHOGENIC	PVS1 | PS1 | PM2 | PP5	HRD deficient
BRCA2	32912414G>T	3922G>T	E1308*	stop gained	rs80358638	pathogenic	PATHOGENIC	PVS1 | PS1 | PP5 | BS1	HRD deficient
BRCA2	32912419T>C	3927T>C	I1309=	synonymous codon	rs878853576	likely benign	VUS	PM2
BRCA2	32912420AC>A	3929del	T1310fs	frameshift variant	rs397507699	pathogenic	PATHOGENIC	PVS1 | PS1 | PM2 | PP5	HRD deficient
BRCA2	32912422T>C	3930T>C	T1310=	synonymous codon	rs786201722	likely benign	VUS	PM2
BRCA2	32912427ATTACAAGAGAAATACTGAA>A	3936_3954del	N1312fs	frameshift variant	rs397507700	pathogenic	PATHOGENIC	PVS1 | PS1 | PM2 | PP5	HRD deficient
BRCA2	32912428T>C	3936T>C	N1312=	synonymous codon	rs876659198	likely benign	VUS	PM2
BRCA2	32912430AC>A	3939del	Y1313*	stop gained	rs276174838	pathogenic	PATHOGENIC	PVS1 | PS1 | PM2 | PP5	HRD deficient
BRCA2	32912431C>A	3939C>A	Y1313*	stop gained	rs80358641	pathogenic	PATHOGENIC	PVS1 | PS1 | PM2 | PP5	HRD deficient
BRCA2	32912431C>G	3939C>G	Y1313*	stop gained	rs80358641	pathogenic	PATHOGENIC	PVS1 | PS1 | PM2 | PP5	HRD deficient
BRCA2	32912434G>A	3942G>A	K1314=	synonymous codon	rs1002791506	likely benign	VUS	PM2
BRCA2	32912443T>C	3951T>C	T1317=	synonymous codon	rs767150281	likely benign	VUS	PM2
BRCA2	32912448ATG>A	3957_3958del	N1319fs	frameshift variant	rs886040504	pathogenic	PATHOGENIC	PVS1 | PS1 | PM2 | PP5	HRD deficient
BRCA2	32912448ATGAA>A	3957_3960del	N1319fs	frameshift variant	rs80359417	pathogenic	PATHOGENIC	PVS1 | PS1 | PM2 | PP5	HRD deficient
BRCA2	32912450G>T	3958G>T	E1320*	stop gained	rs80358644	pathogenic	PATHOGENIC	PVS1 | PS1 | PM2 | PP5	HRD deficient
BRCA2	32912458C>T	3966C>T	N1322=	synonymous codon	rs80358647	likely benign	VUS	PM2
BRCA2	32912459A>T	3967A>T	K1323*	stop gained	rs80358648	pathogenic	PATHOGENIC	PVS1 | PS1 | PM2 | PP5	HRD deficient
BRCA2	32912459AAATA>A	3968_3971del	K1323fs	frameshift variant	rs886040505	pathogenic	PATHOGENIC	PVS1 | PS1 | PM2 | PP5	HRD deficient
BRCA2	32912461ATA>A	3972_3973del	T1325fs	frameshift variant	rs886040506	pathogenic	PATHOGENIC	PVS1 | PS1 | PM2 | PP5	HRD deficient
BRCA2	32912463ATACT>A	3972_3975del	Y1324*	stop gained	rs886040507	pathogenic	PATHOGENIC	PVS1 | PS1 | PM2 | PP5	HRD deficient
BRCA2	32912464T>C	3972T>C	Y1324=	synonymous codon	rs1131692119	likely benign	VUS	PM2
BRCA2	32912470T>TTGCT	3975_3978dup	A1327fs	frameshift variant	rs397515636	pathogenic	PATHOGENIC	PVS1 | PS1 | PM2 | PP5	HRD deficient
BRCA2	32912470T>TTTGC	3978_3979insTTGC	A1327fs	frameshift variant	rs1555283488	pathogenic	PATHOGENIC	PVS1 | PS1 | PM2 | PP5	HRD deficient
BRCA2	32912476T>C	3984T>C	S1328=	synonymous codon	rs876660328	likely benign	VUS	PM2
BRCA2	32912485T>C	3993T>C	S1331=	synonymous codon	rs754883505	likely benign	LIKELY BENIGN	BS1
BRCA2	32912491CTT>C	4000_4001del	L1334fs	frameshift variant	rs398122775	pathogenic	PATHOGENIC	PVS1 | PS1 | PM2 | PP5	HRD deficient
BRCA2	32912493T>A	4001T>A	L1334*	stop gained	rs80358652	pathogenic	PATHOGENIC	PVS1 | PS1 | PM2 | PP5	HRD deficient
BRCA2	32912495G>T	4003G>T	E1335*	stop gained	rs747070579	pathogenic	PATHOGENIC	PVS1 | PS1 | PM2 | PP5	HRD deficient
BRCA2	32912497A>AA	4005dup	F1336fs	frameshift variant	rs397507701	pathogenic	PATHOGENIC	PVS1 | PS1 | PM2 | PP5	HRD deficient
BRCA2	32912498T>TA	4006_4007insA	F1336fs	frameshift variant	rs80359419	pathogenic	PATHOGENIC	PVS1 | PS1 | PM2 | PP5	HRD deficient
BRCA2	32912498T>TCATC	4006_4007insCATC	F1336fs	frameshift variant	rs80359419	pathogenic	PATHOGENIC	PVS1 | PS1 | PM2 | PP5	HRD deficient
BRCA2	32912499T>TCATC	4007_4008insCATC	D1337fs	frameshift variant	rs878853577	pathogenic	PATHOGENIC	PVS1 | PS1 | PM2 | PP5	HRD deficient
BRCA2	32912500T>TCATC	4008_4009insCATC	D1337fs	frameshift variant	rs80359420	pathogenic	PATHOGENIC	PVS1 | PS1 | PM2 | PP5	HRD deficient
BRCA2	32912504GG>G	4013del	G1338fs	frameshift variant	rs397507321	pathogenic	PATHOGENIC	PVS1 | PS1 | PM2 | PP5	HRD deficient
BRCA2	32912505G>GGG	4012_4013dup	S1339fs	frameshift variant	rs397507321	pathogenic	PATHOGENIC	PVS1 | PS1 | PM2 | PP5	HRD deficient
BRCA2	32912506C>CGG	4014_4015insGG	S1339fs	frameshift variant	rs276174839	pathogenic	PATHOGENIC	PVS1 | PS1 | PM2 | PP5	HRD deficient
BRCA2	32912512TT>T	4021del	S1341fs	frameshift variant	rs397507702	pathogenic	PATHOGENIC	PVS1 | PS1 | PM2 | PP5	HRD deficient
BRCA2	32912513T>TT	4021dup	S1341fs	frameshift variant	rs397507702	pathogenic	PATHOGENIC	PVS1 | PS1 | PM2 | PP5	HRD deficient
BRCA2	32912514C>A	4022C>A	S1341*	stop gained	rs1135401901	pathogenic	PATHOGENIC	PVS1 | PS1 | PM2 | PP5	HRD deficient
BRCA2	32912515A>C	4023A>C	S1341=	synonymous codon	rs276174840	likely benign	VUS	-
BRCA2	32912521AAATGAT>AC	4030_4035delinsC	N1344fs	frameshift variant	rs886040509	pathogenic	PATHOGENIC	PVS1 | PS1 | PM2 | PP5	HRD deficient
BRCA2	32912528AC>A	4037del	T1346fs	frameshift variant	rs1162394508	pathogenic	PATHOGENIC	PVS1 | PS1 | PM2 | PP5	HRD deficient
BRCA2	32912528ACT>A	4037_4038del	T1346fs	frameshift variant	rs80359421	pathogenic	PATHOGENIC	PVS1 | PS1 | PM2 | PP5	HRD deficient
BRCA2	32912534T>TT	4042dup	C1348fs	frameshift variant	rs886037800	pathogenic	PATHOGENIC	PVS1 | PS1 | PM2 | PP5	HRD deficient
BRCA2	32912536T>C	4044T>C	C1348=	synonymous codon	rs770199777	likely benign	VUS	PM2
BRCA2	32912538T>C	4046T>C	I1349T	missense	rs80358654	benign	LIKELY BENIGN	BS3 | BP1 | BP4 | BP6	neutral
BRCA2	32912539TCATA>T	4048_4051del	H1350fs	frameshift variant	rs80359423	pathogenic	PATHOGENIC	PVS1 | PS1 | PM2 | PP5	HRD deficient
BRCA2	32912540C>CC	4048dup	H1350fs	frameshift variant	rs80359422	pathogenic	PATHOGENIC	PVS1 | PS1 | PM2 | PP5	HRD deficient
BRCA2	32912543A>T	4051A>T	K1351*	stop gained	rs886040510	pathogenic	PATHOGENIC	PVS1 | PS1 | PM2 | PP5	HRD deficient
BRCA2	32912549GAAACG>G	4058_4062del	E1353fs	frameshift variant	rs397507322	pathogenic	PATHOGENIC	PVS1 | PS1 | PP5	HRD deficient
BRCA2	32912553C>T	4061C>T	T1354M	missense	rs80358656	benign	BENIGN	BS1 | BS3 | BP1 | BP4 | BP6	neutral
BRCA2	32912554G>A	4062G>A	T1354=	synonymous codon	rs768735660	likely benign	VUS	-
BRCA2	32912560G>A	4068G>A	L1356=	synonymous codon	rs28897724	benign	LIKELY BENIGN	BS1 | BP6
BRCA2	32912563A>C	4071A>C	L1357=	synonymous codon	rs140556653	benign	LIKELY BENIGN	BS1 | BP6
BRCA2	32912567AC>A	4076del	T1359fs	frameshift variant	rs80359424	pathogenic	PATHOGENIC	PVS1 | PS1 | PM2 | PP5	HRD deficient
BRCA2	32912576CA>C	4085del	H1362fs	frameshift variant	rs431825315	pathogenic	PATHOGENIC	PVS1 | PS1 | PM2 | PP5	HRD deficient
BRCA2	32912578C>T	4086C>T	H1362=	synonymous codon	rs760304057	likely benign	VUS	PM2
BRCA2	32912581C>T	4089C>T	N1363=	synonymous codon	rs80359787	likely benign	VUS	PM2
BRCA2	32912581CAT>C	4092_4093del	I1364fs	frameshift variant	rs80359426	pathogenic	PATHOGENIC	PVS1 | PS1 | PM2 | PP5	HRD deficient
BRCA2	32912582A>C	4090A>C	I1364L	missense	rs56248502	benign	BENIGN	BA1 | BP1 | BP4 | BP6	neutral
BRCA2	32912584A>AA	4092dup	C1365fs	frameshift variant	rs876658329	pathogenic	PATHOGENIC	PVS1 | PS1 | PM2 | PP5	HRD deficient
BRCA2	32912584A>AAA	4092_4093insAA	C1365fs	frameshift variant	rs876658329	pathogenic	PATHOGENIC	PVS1 | PS1 | PM2 | PP5	HRD deficient
BRCA2	32912586G>A	4094G>A	C1365Y	missense	rs80358657	benign	LIKELY BENIGN	BS3 | BP1 | BP4 | BP6	neutral
BRCA2	32912586GT>G	4095del	K1367fs	frameshift variant	rs397507703	pathogenic	PATHOGENIC	PVS1 | PS1 | PM2 | PP5	HRD deficient
BRCA2	32912587T>A	4095T>A	C1365*	stop gained	rs80358658	pathogenic	PATHOGENIC	PVS1 | PS1 | PM2 | PP5	HRD deficient
BRCA2	32912588C>CCATC	4096_4097insCATC	L1366fs	frameshift variant	rs1555283548	pathogenic	PATHOGENIC	PVS1 | PS1 | PM2 | PP5	HRD deficient
BRCA2	32912589T>TCATC	4097_4098insCATC	K1367fs	frameshift variant	rs397507704	pathogenic	PATHOGENIC	PVS1 | PS1 | PM2 | PP5	HRD deficient
BRCA2	32912590T>TCATC	4098_4099insCATC	K1367fs	frameshift variant	rs886040511	pathogenic	PATHOGENIC	PVS1 | PS1 | PM2 | PP5	HRD deficient
BRCA2	32912592AA>A	4101del	K1367fs	frameshift variant	rs397507705	pathogenic	PATHOGENIC	PVS1 | PS1 | PM2 | PP5	HRD deficient
BRCA2	32912593A>AA	4101dup	L1368fs	frameshift variant	rs397507705	pathogenic	PATHOGENIC	PVS1 | PS1 | PM2 | PP5	HRD deficient
BRCA2	32912593A>G	4101A>G	K1367=	synonymous codon	rs786201982	likely benign	VUS	PM2
BRCA2	32912594T>C	4102T>C	L1368=	synonymous codon	rs759357549	likely benign	VUS	PM2
BRCA2	32912594TT>T	4103del	L1368fs	frameshift variant	rs1555283552	pathogenic	PATHOGENIC	PVS1 | PS1 | PM2 | PP5	HRD deficient
BRCA2	32912602C>T	4110C>T	G1370=	synonymous codon	rs758430181	likely benign	VUS	-
BRCA2	32912603C>T	4111C>T	Q1371*	stop gained	rs80358659	pathogenic	PATHOGENIC	PVS1 | PS1 | PM2 | PP5	HRD deficient
BRCA2	32912604A>AA	4112dup	F1372fs	frameshift variant	rs730881606	pathogenic	PATHOGENIC	PVS1 | PS1 | PM2 | PP5	HRD deficient
BRCA2	32912612AA>A	4121del	K1374fs	frameshift variant	rs397507707	pathogenic	PATHOGENIC	PVS1 | PS1 | PM2 | PP5	HRD deficient
BRCA2	32912615GA>G	4124del	E1375fs	frameshift variant	rs886040512	pathogenic	PATHOGENIC	PVS1 | PS1 | PM2 | PP5	HRD deficient
BRCA2	32912618GGAAA>G	4127_4130del	G1376fs	frameshift variant	rs397507323	pathogenic	PATHOGENIC	PVS1 | PS1 | PM2 | PP5	HRD deficient
BRCA2	32912621AA>A	4130del	N1377fs	frameshift variant	rs80359428	pathogenic	PATHOGENIC	PVS1 | PS1 | PM2 | PP5	HRD deficient
BRCA2	32912623C>CTGAGGA	4131_4132insTGAGGA	T1378*	stop gained	rs80359429	pathogenic	PATHOGENIC	PVS1 | PS1 | PM2 | PP5	HRD deficient
BRCA2	32912624ACTCA>A	4133_4136del	T1378fs	frameshift variant	rs80359430	pathogenic	PATHOGENIC	PVS1 | PS1 | PM2 | PP5	HRD deficient
BRCA2	32912626TC>T	4135del	Q1379fs	frameshift variant	rs1555283588	pathogenic	PATHOGENIC	PVS1 | PS1 | PM2 | PP5	HRD deficient
BRCA2	32912628A>AA	4136dup	I1380fs	frameshift variant	rs397507708	pathogenic	PATHOGENIC	PVS1 | PS1 | PM2 | PP5	HRD deficient
BRCA2	32912628AGATTA>A	4137_4141del	I1380fs	frameshift variant	rs80359431	pathogenic	PATHOGENIC	PVS1 | PS1 | PM2 | PP5	HRD deficient
BRCA2	32912629G>A	4137G>A	Q1379=	synonymous codon	rs768918982	likely benign	VUS	-
BRCA2	32912632T>TTT	4139_4140dup	K1381fs	frameshift variant	rs276174842	pathogenic	PATHOGENIC	PVS1 | PS1 | PM2 | PP5	HRD deficient
BRCA2	32912637AAGAT>A	4146_4149del	E1382fs	frameshift variant	rs886040513	pathogenic	PATHOGENIC	PVS1 | PS1 | PM2 | PP5	HRD deficient
BRCA2	32912639GAT>G	4148_4149del	D1383fs	frameshift variant	rs886037799	pathogenic	PATHOGENIC	PVS1 | PS1 | PM2 | PP5	HRD deficient
BRCA2	32912642TT>T	4151del	L1384fs	frameshift variant	rs397507710	pathogenic	PATHOGENIC	PVS1 | PS1 | PM2 | PP5	HRD deficient
BRCA2	32912643T>A	4151T>A	L1384*	stop gained	rs397507325	pathogenic	PATHOGENIC	PVS1 | PS1 | PM2 | PP5	HRD deficient
BRCA2	32912644G>A	4152G>A	L1384=	synonymous codon	rs786203593	likely benign	VUS	PM2
BRCA2	32912646C>A	4154C>A	S1385*	stop gained	rs886038101	pathogenic	PATHOGENIC	PVS1 | PS1 | PM2 | PP5	HRD deficient
BRCA2	32912652T>TGGAAG	4160_4161insGGAAG	T1388fs	frameshift variant	rs765444423	pathogenic	PATHOGENIC	PVS1 | PS1 | PM2 | PP5	HRD deficient
BRCA2	32912653AACTTT>A	4162_4166del	T1388fs	frameshift variant	rs750704702	pathogenic	PATHOGENIC	PVS1 | PS1 | PM2 | PP5	HRD deficient
BRCA2	32912654ACT>AA	4163_4164delinsA	T1388fs	frameshift variant	rs276174843	pathogenic	PATHOGENIC	PVS1 | PS1 | PM2 | PP5	HRD deficient
BRCA2	32912659TTT>T	4168_4169del	L1390fs	frameshift variant	rs80359433	pathogenic	PATHOGENIC	PVS1 | PS1 | PM2 | PP5	HRD deficient
BRCA2	32912660TT>T	4169del	L1390fs	frameshift variant	rs80359433	pathogenic	PATHOGENIC	PVS1 | PS1 | PM2 | PP5	HRD deficient
BRCA2	32912661T>TT	4169dup	L1390fs	frameshift variant	rs80359433	pathogenic	PATHOGENIC	PVS1 | PS1 | PM2 | PP5	HRD deficient
BRCA2	32912661TGG>T	4170_4171del	E1391fs	frameshift variant	rs878853579	pathogenic	PATHOGENIC	PVS1 | PS1 | PM2 | PP5	HRD deficient
BRCA2	32912662GG>G	4171del	E1391fs	frameshift variant	rs397507711	pathogenic	PATHOGENIC	PVS1 | PS1 | PM2 | PP5	HRD deficient
BRCA2	32912667TT>T	4176del	A1393fs	frameshift variant	rs863224825	pathogenic	PATHOGENIC	PVS1 | PS1 | PM2 | PP5	HRD deficient
BRCA2	32912669G>GG	4177dup	A1393fs	frameshift variant	rs876659977	pathogenic	PATHOGENIC	PVS1 | PS1 | PM2 | PP5	HRD deficient
BRCA2	32912671G>A	4179G>A	A1393=	synonymous codon	rs770531115	likely benign	LIKELY BENIGN	BS1
BRCA2	32912679A>G	4187A>G	Q1396R	missense	rs55969723	benign	BENIGN	BS1 | BS3 | BP1 | BP4 | BP6	neutral
BRCA2	32912679AA>A	4188del	E1397fs	frameshift variant	rs80359434	pathogenic	PATHOGENIC	PVS1 | PS1 | PM2 | PP5	HRD deficient
BRCA2	32912680A>G	4188A>G	Q1396=	synonymous codon	rs1131692129	likely benign	VUS	PM2
BRCA2	32912698T>C	4206T>C	N1402=	synonymous codon	rs878853580	likely benign	VUS	PM2
BRCA2	32912701T>A	4209T>A	T1403=	synonymous codon	rs1131692120	likely benign	VUS	PM2
BRCA2	32912702TC>T	4211del	S1404*	stop gained	rs398122777	pathogenic	PATHOGENIC	PVS1 | PS1 | PM2 | PP5	HRD deficient
BRCA2	32912702TCAAAT>T	4211_4215del	S1404*	stop gained	rs786203340	pathogenic	PATHOGENIC	PVS1 | PS1 | PM2 | PP5	HRD deficient
BRCA2	32912703C>G	4211C>G	S1404*	stop gained	rs41293489	pathogenic	PATHOGENIC	PVS1 | PS1 | PM2 | PP5	HRD deficient
BRCA2	32912709AAGAA>A	4218_4221del	K1406fs	frameshift variant	rs80359435	pathogenic	PATHOGENIC	PVS1 | PS1 | PM2 | PP5	HRD deficient
BRCA2	32912712AA>A	4221del	E1407fs	frameshift variant	rs886040515	pathogenic	PATHOGENIC	PVS1 | PS1 | PM2 | PP5	HRD deficient
BRCA2	32912714C>T	4222C>T	Q1408*	stop gained	rs80358663	pathogenic	PATHOGENIC	PVS1 | PS1 | PM2 | PP5	HRD deficient
BRCA2	32912714CA>C	4223del	Q1408fs	frameshift variant	rs397507712	pathogenic	PATHOGENIC	PVS1 | PS1 | PM2 | PP5	HRD deficient
BRCA2	32912716G>A	4224G>A	Q1408=	synonymous codon	rs863224306	likely benign	VUS	PM2
BRCA2	32912718T>A	4226T>A	L1409*	stop gained	rs1057520636	pathogenic	PATHOGENIC	PVS1 | PS1 | PM2 | PP5	HRD deficient
BRCA2	32912720A>AA	4228dup	T1410fs	frameshift variant	rs879255450	pathogenic	PATHOGENIC	PVS1 | PS1 | PM2 | PP5	HRD deficient
BRCA2	32912721C>CA	4229_4230insA	A1411fs	frameshift variant	rs886040516	pathogenic	PATHOGENIC	PVS1 | PS1 | PM2 | PP5	HRD deficient
BRCA2	32912733C>T	4241C>T	T1414M	missense	rs70953664	benign	LIKELY BENIGN	BS1 | BP1 | BP4 | BP6
BRCA2	32912734G>A	4242G>A	T1414=	synonymous codon	rs750495335	likely benign	VUS	PM2
BRCA2	32912734G>T	4242G>T	T1414=	synonymous codon	rs750495335	likely benign	VUS	-
BRCA2	32912735G>T	4243G>T	E1415*	stop gained	rs397507327	pathogenic	PATHOGENIC	PVS1 | PS1 | PM2 | PP5	HRD deficient
BRCA2	32912736AG>A	4245del	E1415fs	frameshift variant	rs767234936	pathogenic	PATHOGENIC	PVS1 | PS1 | PM2 | PP5	HRD deficient
BRCA2	32912737G>A	4245G>A	E1415=	synonymous codon	rs786201111	likely benign	VUS	PM2
BRCA2	32912738C>T	4246C>T	Q1416*	stop gained	rs786202421	pathogenic	PATHOGENIC	PVS1 | PS1 | PM2 | PP5	HRD deficient
BRCA2	32912740A>G	4248A>G	Q1416=	synonymous codon	rs786201887	likely benign	VUS	PM2
BRCA2	32912743TATAA>TT	4252_4255delinsT	I1418*	stop gained	rs886038102	pathogenic	PATHOGENIC	PVS1 | PM2 | PP5	HRD deficient
BRCA2	32912749AG>A	4258del	D1420fs	frameshift variant	rs80359436	pathogenic	PATHOGENIC	PVS1 | PS1 | PM2 | PP5	HRD deficient
BRCA2	32912750G>T	4258G>T	D1420Y	missense	rs28897727	benign	BENIGN	BA1 | BS3 | BP1 | BP4 | BP6	neutral
BRCA2	32912755T>C	4263T>C	F1421=	synonymous codon	rs786201704	likely benign	VUS	PM2
BRCA2	32912755T>TT	4263dup	E1422*	stop gained	rs1555283664	pathogenic	PATHOGENIC	PVS1 | PS1 | PM2 | PP5	HRD deficient
BRCA2	32912755TGAGACTT>T	4264_4270del	E1422fs	frameshift variant	rs886040517	pathogenic	PATHOGENIC	PVS1 | PS1 | PM2 | PP5	HRD deficient
BRCA2	32912761T>C	4269T>C	T1423=	synonymous codon	rs786201377	likely benign	VUS	-
BRCA2	32912762TC>T	4271del	S1424fs	frameshift variant	rs80359437	pathogenic	PATHOGENIC	PVS1 | PS1 | PM2 | PP5	HRD deficient
BRCA2	32912764TG>T	4273del	D1425fs	frameshift variant	rs1060502426	pathogenic	PATHOGENIC	PVS1 | PS1 | PM2 | PP5	HRD deficient
BRCA2	32912768A>AA	4276dup	T1426fs	frameshift variant	rs80359438	pathogenic	PATHOGENIC	PVS1 | PS1 | PM2 | PP5	HRD deficient
BRCA2	32912768AC>A	4277del	T1426fs	frameshift variant	rs730881608	pathogenic	PATHOGENIC	PVS1 | PS1 | PM2 | PP5	HRD deficient
BRCA2	32912776T>TT	4284dup	Q1429fs	frameshift variant	rs80359439	pathogenic	PATHOGENIC	PVS1 | PS1 | PP5	HRD deficient
BRCA2	32912777C>CT	4285_4286insT	Q1429fs	frameshift variant	rs886040518	pathogenic	PATHOGENIC	PVS1 | PS1 | PM2 | PP5	HRD deficient
BRCA2	32912777C>T	4285C>T	Q1429*	stop gained	rs80358665	pathogenic	PATHOGENIC	PVS1 | PS1 | PM2 | PP5	HRD deficient
BRCA2	32912785A>G	4293A>G	A1431=	synonymous codon	rs786201516	likely benign	VUS	PM2
BRCA2	32912795AA>A	4304del	N1435fs	frameshift variant	rs886040520	pathogenic	PATHOGENIC	PVS1 | PS1 | PM2 | PP5	HRD deficient
BRCA2	32912795AAT>A	4306_4307del	I1436*	stop gained	rs886040522	pathogenic	PATHOGENIC	PVS1 | PS1 | PM2 | PP5	HRD deficient
BRCA2	32912796AT>A	4305del	N1435fs	frameshift variant	rs886040521	pathogenic	PATHOGENIC	PVS1 | PS1 | PM2 | PP5	HRD deficient
BRCA2	32912801AGT>A	4312_4313del	V1438fs	frameshift variant	rs1064794168	pathogenic	LIKELY PATHOGENIC	PVS1 | PM2	HRD deficient
BRCA2	32912805TC>T	4314del	A1439fs	frameshift variant	rs80359441	pathogenic	PATHOGENIC	PVS1 | PS1 | PM2 | PP5	HRD deficient
BRCA2	32912806C>T	4314C>T	V1438=	synonymous codon	rs730881590	likely benign	LIKELY BENIGN	BS1
BRCA2	32912810AAA>A	4319_4320del	K1440fs	frameshift variant	rs397507328	pathogenic	PATHOGENIC	PVS1 | PS1 | PM2 | PP5	HRD deficient
BRCA2	32912812A>G	4320A>G	K1440=	synonymous codon	rs769535925	likely benign	VUS	-
BRCA2	32912815G>A	4323G>A	E1441=	synonymous codon	rs876660370	likely benign	VUS	PM2
BRCA2	32912817C>A	4325C>A	S1442*	stop gained	rs80358670	pathogenic	PATHOGENIC	PVS1 | PS1 | PM2 | PP5	HRD deficient
BRCA2	32912817C>G	4325C>G	S1442*	stop gained	rs80358670	pathogenic	PATHOGENIC	PVS1 | PS1 | PM2 | PP5	HRD deficient
BRCA2	32912818A>G	4326A>G	S1442=	synonymous codon	rs528810278	likely benign	VUS	PM2
BRCA2	32912825AAAATT>A	4334_4338del	K1445fs	frameshift variant	rs886040524	pathogenic	PATHOGENIC	PVS1 | PS1 | PM2 | PP5	HRD deficient
BRCA2	32912830T>C	4338T>C	I1446=	synonymous codon	rs864622144	likely benign	VUS	PM2
BRCA2	32912830TG>T	4339del	V1447*	stop gained	rs80359443	pathogenic	PATHOGENIC	PVS1 | PS1 | PM2 | PP5	HRD deficient
BRCA2	32912837TTCTTT>T	4346_4350del	F1449*	stop gained	rs1555283735	pathogenic	PATHOGENIC	PVS1 | PS1 | PM2 | PP5	HRD deficient
BRCA2	32912844ATCAGAAA>A	4353_4359del	P1454fs	frameshift variant	rs1555283736	pathogenic	PATHOGENIC	PVS1 | PS1 | PM2 | PP5	HRD deficient
BRCA2	32912846C>T	4354C>T	Q1452*	stop gained	rs431825319	pathogenic	PATHOGENIC	PVS1 | PS1 | PM2 | PP5	HRD deficient
BRCA2	32912851A>G	4359A>G	K1453=	synonymous codon	rs774446640	likely benign	VUS	PM2
BRCA2	32912858G>T	4366G>T	E1456*	stop gained	rs876659847	pathogenic	PATHOGENIC	PVS1 | PS1 | PM2 | PP5	HRD deficient
BRCA2	32912861T>C	4369T>C	L1457=	synonymous codon	rs754004520	likely benign	VUS	-
BRCA2	32912863G>A	4371G>A	L1457=	synonymous codon	rs755130086	likely benign	VUS	PM2
BRCA2	32912867AA>A	4376del	N1459fs	frameshift variant	rs1555283752	pathogenic	PATHOGENIC	PVS1 | PS1 | PM2 | PP5	HRD deficient
BRCA2	32912871TTT>T	4380_4381del	S1461fs	frameshift variant	rs397507715	pathogenic	PATHOGENIC	PVS1 | PS1 | PM2 | PP5	HRD deficient
BRCA2	32912874CCT>C	4383_4384del	L1462fs	frameshift variant	rs876660510	pathogenic	PATHOGENIC	PVS1 | PS1 | PM2 | PP5	HRD deficient
BRCA2	32912877T>TT	4385dup	L1462fs	frameshift variant	rs886040525	pathogenic	PATHOGENIC	PVS1 | PS1 | PM2 | PP5	HRD deficient
BRCA2	32912882TCTG>TTT	4391_4393delinsTT	S1464fs	frameshift variant	rs878853299	pathogenic	PATHOGENIC	PVS1 | PM2 | PP5	HRD deficient
BRCA2	32912887A>G	4395A>G	E1465=	synonymous codon	rs188234310	likely benign	VUS	PM2
BRCA2	32912889T>A	4397T>A	L1466*	stop gained	rs886040526	pathogenic	PATHOGENIC	PVS1 | PS1 | PM2 | PP5	HRD deficient
BRCA2	32912889TACATT>T	4398_4402del	L1466fs	frameshift variant	rs80359444	pathogenic	PATHOGENIC	PVS1 | PS1 | PM2 | PP5	HRD deficient
BRCA2	32912893T>TA	4401_4402insA	S1468fs	frameshift variant	rs1555283766	pathogenic	PATHOGENIC	PVS1 | PS1 | PM2 | PP5	HRD deficient
BRCA2	32912894T>TA	4402_4403insA	S1468fs	frameshift variant	rs886040527	pathogenic	PATHOGENIC	PVS1 | PS1 | PM2 | PP5	HRD deficient
BRCA2	32912896T>TT	4404dup	D1469*	stop gained	rs886040528	pathogenic	PATHOGENIC	PVS1 | PS1 | PM2 | PP5	HRD deficient
BRCA2	32912896TGACAT>T	4405_4409del	D1469fs	frameshift variant	rs397507331	pathogenic	PATHOGENIC	PVS1 | PS1 | PM2 | PP5	HRD deficient
BRCA2	32912900ATA>A	4409_4410del	I1470fs	frameshift variant	rs80359446	pathogenic	PATHOGENIC	PVS1 | PS1 | PM2 | PP5	HRD deficient
BRCA2	32912900ATAAGA>A	4409_4413del	I1470fs	frameshift variant	rs397507718	pathogenic	PATHOGENIC	PVS1 | PS1 | PM2 | PP5	HRD deficient
BRCA2	32912902A>C	4410A>C	I1470=	synonymous codon	rs747516635	likely benign	LIKELY BENIGN	BS1
BRCA2	32912902AAGAA>A	4415_4418del	K1472fs	frameshift variant	rs397507333	pathogenic	PATHOGENIC	PVS1 | PS1 | PM2 | PP5	HRD deficient
BRCA2	32912905AAA>A	4414_4415del	K1472fs	frameshift variant	rs397507332	pathogenic	PATHOGENIC	PVS1 | PS1 | PM2 | PP5	HRD deficient
BRCA2	32912909AA>A	4418del	N1473fs	frameshift variant	rs886038103	pathogenic	PATHOGENIC	PVS1 | PS1 | PM2 | PP5	HRD deficient
BRCA2	32912910AC>A	4419del	N1473fs	frameshift variant	rs1064794337	pathogenic	PATHOGENIC	PVS1 | PS1 | PM2 | PP5	HRD deficient
BRCA2	32912914AA>A	4423del	M1475fs	frameshift variant	rs80359447	pathogenic	PATHOGENIC	PVS1 | PS1 | PM2 | PP5	HRD deficient
BRCA2	32912916T>TT	4424dup	M1475fs	frameshift variant	rs886040530	pathogenic	PATHOGENIC	PVS1 | PS1 | PM2 | PP5	HRD deficient
BRCA2	32912920CA>C	4429del	I1477fs	frameshift variant	rs886040531	pathogenic	PATHOGENIC	PVS1 | PS1 | PM2 | PP5	HRD deficient
BRCA2	32912923T>C	4431T>C	I1477=	synonymous codon	rs1131692111	likely benign	VUS	PM2
BRCA2	32912926A>G	4434A>G	L1478=	synonymous codon	rs786201411	likely benign	VUS	PM2
BRCA2	32912932T>G	4440T>G	Y1480*	stop gained	rs397507719	pathogenic	PATHOGENIC	PVS1 | PS1 | PM2 | PP5	HRD deficient
BRCA2	32912935G>A	4443G>A	E1481=	synonymous codon	rs876659618	likely benign	VUS	-
BRCA2	32912938AA>A	4447del	T1483fs	frameshift variant	rs876660755	pathogenic	PATHOGENIC	PVS1 | PS1 | PM2 | PP5	HRD deficient
BRCA2	32912940CA>C	4449del	D1484fs	frameshift variant	rs80359448	pathogenic	PATHOGENIC	PVS1 | PS1 | PM2 | PP5	HRD deficient
BRCA2	32912947AGTTA>A	4456_4459del	V1486fs	frameshift variant	rs80359449	pathogenic	PATHOGENIC	PVS1 | PS1 | PM2 | PP5	HRD deficient
BRCA2	32912949TT>T	4458del	K1487fs	frameshift variant	rs886040532	pathogenic	PATHOGENIC	PVS1 | PS1 | PM2 | PP5	HRD deficient
BRCA2	32912951AAA>A	4460_4461del	K1487fs	frameshift variant	rs876660026	pathogenic	PATHOGENIC	PVS1 | PS1 | PM2 | PP5	HRD deficient
BRCA2	32912953A>G	4461A>G	K1487=	synonymous codon	rs786201350	likely benign	VUS	PM2
BRCA2	32912953ACA>A	4464_4465del	H1488fs	frameshift variant	rs397507720	pathogenic	PATHOGENIC	PVS1 | PS1 | PM2 | PP5	HRD deficient
BRCA2	32912957A>T	4465A>T	K1489*	stop gained	rs886038104	pathogenic	PATHOGENIC	PVS1 | PS1 | PM2 | PP5	HRD deficient
BRCA2	32912958AAATACTGA>ATGTTTTT	4467_4474delinsTGTTTTT	K1489fs	frameshift variant	rs886040533	pathogenic	PATHOGENIC	PVS1 | PS1 | PM2 | PP5	HRD deficient
BRCA2	32912962A>AA	4470dup	L1491fs	frameshift variant	rs397507334	pathogenic	PATHOGENIC	PVS1 | PS1 | PM2 | PP5	HRD deficient
BRCA2	32912962ACTGA>A	4471_4474del	L1491fs	frameshift variant	rs80359451	pathogenic	PATHOGENIC	PVS1 | PS1 | PM2 | PP5	HRD deficient
BRCA2	32912963C>T	4471C>T	L1491=	synonymous codon	rs748982373	likely benign	VUS	PM2
BRCA2	32912963CTGAA>C	4472_4475del	L1491fs	frameshift variant	rs80359452	pathogenic	PATHOGENIC	PVS1 | PS1 | PM2 | PP5	HRD deficient
BRCA2	32912965GAAAG>G	4478_4481del	E1493fs	frameshift variant	rs80359454	pathogenic	PATHOGENIC	PVS1 | PS1 | PS3 | PP5	HRD deficient
BRCA2	32912967AA>A	4476del	E1493fs	frameshift variant	rs886040534	pathogenic	PATHOGENIC	PVS1 | PS1 | PM2 | PP5	HRD deficient
BRCA2	32912968A>AA	4476dup	E1493fs	frameshift variant	rs886040534	pathogenic	PATHOGENIC	PVS1 | PS1 | PS3 | PM2 | PP5	HRD deficient
BRCA2	32912968AGA>A	4477_4478del	E1493fs	frameshift variant	rs786203492	pathogenic	PATHOGENIC	PVS1 | PS1 | PM2 | PP5	HRD deficient
BRCA2	32912972A>AA	4480dup	S1494fs	frameshift variant	rs80359453	pathogenic	PATHOGENIC	PVS1 | PS1 | PM2 | PP5	HRD deficient
BRCA2	32912972AGT>A	4483_4484del	V1495fs	frameshift variant	rs886038105	pathogenic	PATHOGENIC	PVS1 | PS1 | PM2 | PP5	HRD deficient
BRCA2	32912977C>A	4485C>A	V1495=	synonymous codon	rs863224307	likely benign	VUS	PM2
BRCA2	32912977C>T	4485C>T	V1495=	synonymous codon	rs863224307	likely benign	VUS	PM2
BRCA2	32912986T>A	4494T>A	G1498=	synonymous codon	rs373160367	likely benign	VUS	-
BRCA2	32912995T>C	4503T>C	N1501=	synonymous codon	rs752976575	likely benign	VUS	PM2
BRCA2	32912997A>AT	4505_4506insT	Q1502fs	frameshift variant	rs1555283813	pathogenic	PATHOGENIC	PVS1 | PS1 | PM2 | PP5	HRD deficient
BRCA2	32913004G>A	4512G>A	V1504=	synonymous codon	rs876660462	likely benign	VUS	PM2
BRCA2	32913004GA>G	4513del	T1505fs	frameshift variant	rs886040536	pathogenic	PATHOGENIC	PVS1 | PS1 | PM2 | PP5	HRD deficient
BRCA2	32913006CCTTCCAGGGAC>C	4515_4525del	F1506fs	frameshift variant	rs863224827	pathogenic	PATHOGENIC	PVS1 | PS1 | PM2 | PP5	HRD deficient
BRCA2	32913010CC>C	4519del	Q1507fs	frameshift variant	rs431825321	pathogenic	PATHOGENIC	PVS1 | PS1 | PM2 | PP5	HRD deficient
BRCA2	32913016A>T	4524A>T	G1508=	synonymous codon	rs876658560	likely benign	VUS	PM2
BRCA2	32913017C>T	4525C>T	Q1509*	stop gained	rs80358683	pathogenic	PATHOGENIC	PVS1 | PS1 | PM2 | PP5	HRD deficient
BRCA2	32913021CC>C	4530del	E1511fs	frameshift variant	rs886040537	pathogenic	PATHOGENIC	PVS1 | PS1 | PM2 | PP5	HRD deficient
BRCA2	32913022C>G	4530C>G	P1510=	synonymous codon	rs757731214	likely benign	LIKELY BENIGN	BS1
BRCA2	32913022C>T	4530C>T	P1510=	synonymous codon	rs757731214	likely benign	VUS	-
BRCA2	32913024AA>A	4533del	E1511fs	frameshift variant	rs886038106	pathogenic	PATHOGENIC	PVS1 | PS1 | PM2 | PP5	HRD deficient
BRCA2	32913026CG>C	4535del	R1512fs	frameshift variant	rs397507723	pathogenic	PATHOGENIC	PVS1 | PS1 | PM2 | PP5	HRD deficient
BRCA2	32913031T>TCGAT	4539_4540insCGAT	E1514fs	frameshift variant	rs1555283829	pathogenic	PATHOGENIC	PVS1 | PS1 | PM2 | PP5	HRD deficient
BRCA2	32913031T>TTGAT	4536_4539dup	E1514*	stop gained	rs397507724	pathogenic	PATHOGENIC	PVS1 | PS1 | PM2 | PP5	HRD deficient
BRCA2	32913032G>GCGAT	4540_4541insCGAT	E1514fs	frameshift variant	rs886040538	pathogenic	PATHOGENIC	PVS1 | PS1 | PM2 | PP5	HRD deficient
BRCA2	32913035AA>A	4544del	K1515fs	frameshift variant	rs397507725	pathogenic	PATHOGENIC	PVS1 | PS1 | PM2 | PP5	HRD deficient
BRCA2	32913036A>AA	4544dup	I1516fs	frameshift variant	rs397507725	pathogenic	PATHOGENIC	PVS1 | PS1 | PM2 | PP5	HRD deficient
BRCA2	32913038A>AA	4546dup	I1516fs	frameshift variant	rs80359456	pathogenic	PATHOGENIC	PVS1 | PS1 | PM2 | PP5	HRD deficient
BRCA2	32913039TCA>T	4548_4549del	K1517fs	frameshift variant	rs1064793413	pathogenic	PATHOGENIC	PVS1 | PS1 | PM2 | PP5	HRD deficient
BRCA2	32913042AAGAA>A	4551_4554del	K1517fs	frameshift variant	rs80359457	pathogenic	PATHOGENIC	PVS1 | PS1 | PM2 | PP5	HRD deficient
BRCA2	32913043AG>A	4552del	E1518fs	frameshift variant	rs398122783	pathogenic	PATHOGENIC	PVS1 | PS1 | PP5 | BS1	HRD deficient
BRCA2	32913044G>T	4552G>T	E1518*	stop gained	rs397507727	pathogenic	PATHOGENIC	PVS1 | PS1 | PM2 | PP5	HRD deficient
BRCA2	32913045AA>A	4554del	E1518fs	frameshift variant	rs80359458	pathogenic	PATHOGENIC	PVS1 | PS1 | PM2 | PP5	HRD deficient
BRCA2	32913046A>G	4554A>G	E1518=	synonymous codon	rs200185407	likely benign	VUS	PM2
BRCA2	32913047CC>C	4556del	P1519fs	frameshift variant	rs397507728	pathogenic	PATHOGENIC	PVS1 | PS1 | PM2 | PP5	HRD deficient
BRCA2	32913053C>T	4561C>T	L1521=	synonymous codon	rs370723514	likely benign	VUS	-
BRCA2	32913054TAT>T	4563_4564del	L1522fs	frameshift variant	rs483353115	pathogenic	PATHOGENIC	PVS1 | PS1 | PP5	HRD deficient
BRCA2	32913055A>C	4563A>C	L1521=	synonymous codon	rs206075	likely benign	VUS	PM2
BRCA2	32913055A>G	4563A>G	L1521=	synonymous codon	rs206075	benign	BENIGN	BA1 | BP6	neutral
BRCA2	32913056T>C	4564T>C	L1522=	synonymous codon	rs876660588	likely benign	VUS	PM2
BRCA2	32913062T>G	4570T>G	F1524V	missense	rs56386506	benign	BENIGN	BA1 | BS3 | BP6 | PP3	neutral
BRCA2	32913067T>C	4575T>C	H1525=	synonymous codon	rs762189076	likely benign	VUS	PM2
BRCA2	32913068A>AA	4576dup	T1526fs	frameshift variant	rs886040539	pathogenic	PATHOGENIC	PVS1 | PS1 | PM2 | PP5	HRD deficient
BRCA2	32913070A>G	4578A>G	T1526=	synonymous codon	rs202022822	benign	LIKELY BENIGN	BS1 | BP6
BRCA2	32913076C>T	4584C>T	S1528=	synonymous codon	rs80359788	likely benign	LIKELY BENIGN	BS1
BRCA2	32913077G>A	4585G>A	G1529R	missense	rs28897728	benign	BENIGN	BA1 | BS1 | BS3 | BP6 | PP3	neutral
BRCA2	32913079G>GG	4587dup	K1530fs	frameshift variant	rs745456776	pathogenic	PATHOGENIC	PVS1 | PS1 | PM2 | PP5	HRD deficient
BRCA2	32913079G>T	4587G>T	G1529=	synonymous codon	rs1060502489	likely benign	VUS	PM2
BRCA2	32913080A>T	4588A>T	K1530*	stop gained	rs80358692	pathogenic	PATHOGENIC	PVS1 | PS1 | PM2 | PP5	HRD deficient
BRCA2	32913084AA>A	4593del	V1532fs	frameshift variant	rs397507731	pathogenic	PATHOGENIC	PVS1 | PS1 | PM2 | PP5	HRD deficient
BRCA2	32913085A>AA	4593dup	V1532fs	frameshift variant	rs397507731	pathogenic	PATHOGENIC	PVS1 | PS1 | PM2 | PP5	HRD deficient
BRCA2	32913085AGTTA>A	4594_4597del	V1532fs	frameshift variant	rs886038107	pathogenic	PATHOGENIC	PVS1 | PS1 | PM2 | PP5	HRD deficient
BRCA2	32913085AGTTAA>A	4594_4598del	V1532fs	frameshift variant	rs879254138	pathogenic	PATHOGENIC	PVS1 | PS1 | PM2 | PP5	HRD deficient
BRCA2	32913100G>A	4608G>A	K1536=	synonymous codon	rs786201740	likely benign	VUS	PM2
BRCA2	32913101G>A	4609G>A	E1537K	missense	rs753244927	benign	LIKELY BENIGN	BP1 | BP4 | BP6 | PM2
BRCA2	32913106T>C	4614T>C	S1538=	synonymous codon	rs45520945	likely benign	LIKELY BENIGN	BS1
BRCA2	32913106TTT>T	4615_4616del	L1539fs	frameshift variant	rs869320783	pathogenic	PATHOGENIC	PVS1 | PS1 | PM2 | PP5	HRD deficient
BRCA2	32913110GACAAA>G	4619_4623del	D1540fs	frameshift variant	rs869320793	pathogenic	PATHOGENIC	PVS1 | PS1 | PM2 | PP5	HRD deficient
BRCA2	32913116GT>G	4625del	V1542fs	frameshift variant	rs886040540	pathogenic	PATHOGENIC	PVS1 | PS1 | PM2 | PP5	HRD deficient
BRCA2	32913118G>T	4626G>T	V1542=	synonymous codon	rs772004723	likely benign	VUS	PM2
BRCA2	32913122AA>A	4631del	N1544fs	frameshift variant	rs80359460	pathogenic	PATHOGENIC	PVS1 | PS1 | PM2 | PP5	HRD deficient
BRCA2	32913123A>AA	4631dup	N1544fs	frameshift variant	rs80359460	pathogenic	PATHOGENIC	PVS1 | PS1 | PM2 | PP5	HRD deficient
BRCA2	32913124CC>C	4633del	L1545fs	frameshift variant	rs876658654	pathogenic	PATHOGENIC	PVS1 | PS1 | PM2 | PP5	HRD deficient
BRCA2	32913129TT>T	4638del	F1546fs	frameshift variant	rs80359462	pathogenic	PATHOGENIC	PVS1 | PS1 | PM2 | PP5	HRD deficient
BRCA2	32913129TTGA>TGG	4638_4640delinsGG	F1546fs	frameshift variant	rs886040541	pathogenic	PATHOGENIC	PVS1 | PS1 | PM2 | PP5	HRD deficient
BRCA2	32913130T>TT	4638dup	D1547*	stop gained	rs80359462	pathogenic	PATHOGENIC	PVS1 | PS1 | PM2 | PP5	HRD deficient
BRCA2	32913138AAGAG>A	4647_4650del	K1549fs	frameshift variant	rs397507734	pathogenic	PATHOGENIC	PVS1 | PS1 | PM2 | PP5	HRD deficient
BRCA2	32913140G>T	4648G>T	E1550*	stop gained	rs80358695	pathogenic	PATHOGENIC	PVS1 | PS1 | PM2 | PP5	HRD deficient
BRCA2	32913143C>T	4651C>T	Q1551*	stop gained	rs876661062	pathogenic	PATHOGENIC	PVS1 | PS1 | PM2 | PP5	HRD deficient
BRCA2	32913145AGGTA>A	4654_4657del	G1552fs	frameshift variant	rs1555283889	pathogenic	PATHOGENIC	PVS1 | PS1 | PM2 | PP5	HRD deficient
BRCA2	32913148T>C	4656T>C	G1552=	synonymous codon	rs41293491	likely benign	LIKELY BENIGN	BS1
BRCA2	32913168TT>T	4677del	F1559fs	frameshift variant	rs1064794708	pathogenic	PATHOGENIC	PVS1 | PS1 | PM2 | PP5	HRD deficient
BRCA2	32913169T>C	4677T>C	F1559=	synonymous codon	rs786201540	likely benign	VUS	PM2
BRCA2	32913175T>C	4683T>C	H1561=	synonymous codon	rs876659377	likely benign	VUS	PM2
BRCA2	32913176C>T	4684C>T	Q1562*	stop gained	rs397507737	pathogenic	PATHOGENIC	PVS1 | PS1 | PM2 | PP5	HRD deficient
BRCA2	32913178A>G	4686A>G	Q1562=	synonymous codon	rs28897730	likely benign	LIKELY BENIGN	BS1
BRCA2	32913181G>A	4689G>A	W1563*	stop gained	rs886038108	pathogenic	PATHOGENIC	PVS1 | PS1 | PM2 | PP5 | BS1	HRD deficient
BRCA2	32913183C>CC	4691dup	T1566fs	frameshift variant	rs786204209	pathogenic	PATHOGENIC	PVS1 | PS1 | PM2 | PP5	HRD deficient
BRCA2	32913190C>CGACC	4695_4698dup	L1567fs	frameshift variant	rs397507738	pathogenic	PATHOGENIC	PVS1 | PS1 | PM2 | PP5	HRD deficient
BRCA2	32913190C>T	4698C>T	T1566=	synonymous codon	rs750813972	likely benign	VUS	-
BRCA2	32913191C>T	4699C>T	L1567=	synonymous codon	rs146514381	likely benign	VUS	-
BRCA2	32913192T>TT	4700dup	Y1569fs	frameshift variant	rs1555283907	pathogenic	PATHOGENIC	PVS1 | PS1 | PM2 | PP5	HRD deficient
BRCA2	32913198ACA>A	4707_4708del	Y1569*	stop gained	rs1555283911	pathogenic	PATHOGENIC	PVS1 | PS1 | PM2 | PP5	HRD deficient
BRCA2	32913199C>A	4707C>A	Y1569*	stop gained	rs878853585	pathogenic	PATHOGENIC	PVS1 | PS1 | PM2 | PP5	HRD deficient
BRCA2	32913199CAG>C	4712_4713del	E1571fs	frameshift variant	rs80359464	pathogenic	PATHOGENIC	PVS1 | PS1 | PM2 | PP5	HRD deficient
BRCA2	32913201GA>G	4710del	E1571fs	frameshift variant	rs1555283915	pathogenic	PATHOGENIC	PVS1 | PS1 | PM2 | PP5	HRD deficient
BRCA2	32913205G>A	4713G>A	E1571=	synonymous codon	rs431825322	likely benign	VUS	PM2
BRCA2	32913214A>AA	4722dup	D1575fs	frameshift variant	rs879255453	pathogenic	PATHOGENIC	PVS1 | PS1 | PM2 | PP5	HRD deficient
BRCA2	32913217C>T	4725C>T	D1575=	synonymous codon	rs752402938	likely benign	VUS	-
BRCA2	32913222AA>A	4731del	E1577fs	frameshift variant	rs397507740	pathogenic	PATHOGENIC	PVS1 | PS1 | PM2 | PP5	HRD deficient
BRCA2	32913222AATTAGC>AG	4731_4736delinsG	L1578fs	frameshift variant	rs276174846	pathogenic	PATHOGENIC	PVS1 | PS1 | PM2 | PP5	HRD deficient
BRCA2	32913223A>AA	4731dup	L1578fs	frameshift variant	rs397507740	pathogenic	PATHOGENIC	PVS1 | PS1 | PM2 | PP5	HRD deficient
BRCA2	32913229ATG>A	4740_4741del	C1580*	stop gained	rs864622401	pathogenic	LIKELY PATHOGENIC	PVS1 | PM2	HRD deficient
BRCA2	32913232TG>TAA	4741delinsAA	E1581fs	frameshift variant	rs886040547	pathogenic	PATHOGENIC	PVS1 | PS1 | PM2 | PP5	HRD deficient
BRCA2	32913234A>ATG	4742_4743insTG	E1581fs	frameshift variant	rs276174847	pathogenic	PATHOGENIC	PVS1 | PS1 | PM2 | PP5	HRD deficient
BRCA2	32913240TT>T	4749del	I1583fs	frameshift variant	rs1555283928	pathogenic	PATHOGENIC	PVS1 | PS1 | PM2 | PP5	HRD deficient
BRCA2	32913257CC>C	4766del	P1589fs	frameshift variant	rs397507741	pathogenic	PATHOGENIC	PVS1 | PS1 | PM2 | PP5	HRD deficient
BRCA2	32913259A>G	4767A>G	P1589=	synonymous codon	rs755818549	likely benign	VUS	PM2
BRCA2	32913260AA>A	4769del	K1590fs	frameshift variant	rs879255328	pathogenic	PATHOGENIC	PVS1 | PS1 | PM2 | PP5	HRD deficient
BRCA2	32913266A>T	4774A>T	K1592*	stop gained	rs886040548	pathogenic	PATHOGENIC	PVS1 | PS1 | PM2 | PP5	HRD deficient
BRCA2	32913271AA>A	4780del	M1594fs	frameshift variant	rs397507742	pathogenic	PATHOGENIC	PVS1 | PS1 | PM2 | PP5	HRD deficient
BRCA2	32913275C>T	4783C>T	Q1595*	stop gained	rs886040549	pathogenic	PATHOGENIC	PVS1 | PS1 | PM2 | PP5	HRD deficient
BRCA2	32913283T>C	4791T>C	S1597=	synonymous codon	rs786201728	likely benign	LIKELY BENIGN	BS1
BRCA2	32913285TCAAT>T	4794_4797del	N1599fs	frameshift variant	rs747418290	pathogenic	PATHOGENIC	PVS1 | PS1 | PM2 | PP5	HRD deficient
BRCA2	32913288AT>A	4797del	N1599fs	frameshift variant	rs80359465	pathogenic	PATHOGENIC	PVS1 | PS1 | PM2 | PP5	HRD deficient
BRCA2	32913289T>C	4797T>C	N1599=	synonymous codon	rs543172402	likely benign	VUS	PM2
BRCA2	32913290AA>A	4799del	N1600fs	frameshift variant	rs886040550	pathogenic	PATHOGENIC	PVS1 | PS1 | PM2 | PP5	HRD deficient
BRCA2	32913299AA>A	4808del	N1603fs	frameshift variant	rs80359466	pathogenic	PATHOGENIC	PVS1 | PS1 | PM2 | PP5	HRD deficient
BRCA2	32913300A>AA	4808dup	N1603fs	frameshift variant	rs80359466	pathogenic	PATHOGENIC	PVS1 | PS1 | PP5	HRD deficient
BRCA2	32913301C>CA	4809_4810insA	L1604fs	frameshift variant	rs80359467	pathogenic	PATHOGENIC	PVS1 | PS1 | PM2 | PP5	HRD deficient
BRCA2	32913312TTG>T	4821_4822del	E1608fs	frameshift variant	rs769017108	pathogenic	PATHOGENIC	PVS1 | PS1 | PP5	HRD deficient
BRCA2	32913312TTGA>TC	4821_4823delinsC	E1608fs	frameshift variant	rs587782854	pathogenic	PATHOGENIC	PVS1 | PS1 | PM2 | PP5	HRD deficient
BRCA2	32913313TGA>T	4824_4825del	E1608fs	frameshift variant	rs730881610	pathogenic	PATHOGENIC	PVS1 | PS1 | PM2 | PP5	HRD deficient
BRCA2	32913318CTG>C	4829_4830del	V1610fs	frameshift variant	rs80359468	pathogenic	PATHOGENIC	PVS1 | PS1 | PM2 | PP5 | BS1	HRD deficient
BRCA2	32913320G>GG	4828dup	V1610fs	frameshift variant	rs397507744	pathogenic	PATHOGENIC	PVS1 | PS1 | PM2 | PP5	HRD deficient
BRCA2	32913322G>A	4830G>A	V1610=	synonymous codon	rs80359789	likely benign	VUS	-
BRCA2	32913322G>T	4830G>T	V1610=	synonymous codon	rs80359789	likely benign	VUS	PM2
BRCA2	32913331T>G	4839T>G	P1613=	synonymous codon	rs752311184	likely benign	VUS	PM2
BRCA2	32913334GCT>G	4845_4846del	L1616fs	frameshift variant	rs80359469	pathogenic	PATHOGENIC	PVS1 | PS1 | PM2 | PP5	HRD deficient
BRCA2	32913337C>T	4845C>T	L1615=	synonymous codon	rs876658816	likely benign	VUS	PM2
BRCA2	32913339T>G	4847T>G	L1616*	stop gained	rs398122786	pathogenic	PATHOGENIC	PVS1 | PS1 | PM2 | PP5	HRD deficient
BRCA2	32913339TAA>T	4848_4849del	S1617*	stop gained	rs397507746	pathogenic	PATHOGENIC	PVS1 | PS1 | PM2 | PP5	HRD deficient
BRCA2	32913339TAAGT>T	4848_4851del	S1617fs	frameshift variant	rs1135401903	pathogenic	PATHOGENIC	PVS1 | PS1 | PM2 | PP5	HRD deficient
BRCA2	32913340A>G	4848A>G	L1616=	synonymous codon	rs876659259	likely benign	VUS	PM2
BRCA2	32913344GA>GGCTCT	4853delinsGCTCT	D1618fs	frameshift variant	rs886040551	pathogenic	PATHOGENIC	PVS1 | PM2 | PP5	HRD deficient
BRCA2	32913350T>C	4858T>C	L1620=	synonymous codon	rs528771743	likely benign	VUS	-
BRCA2	32913351T>G	4859T>G	L1620*	stop gained	rs80358710	pathogenic	PATHOGENIC	PVS1 | PS1 | PM2 | PP5	HRD deficient
BRCA2	32913367AAA>A	4876_4877del	N1626fs	frameshift variant	rs80359470	pathogenic	PATHOGENIC	PVS1 | PS1 | PM2 | PP5	HRD deficient
BRCA2	32913369A>AA	4877dup	N1626fs	frameshift variant	rs80359470	pathogenic	PATHOGENIC	PVS1 | PS1 | PM2 | PP5	HRD deficient
BRCA2	32913373C>G	4881C>G	L1627=	synonymous codon	rs756104738	likely benign	VUS	-
BRCA2	32913381C>A	4889C>A	S1630*	stop gained	rs80358711	pathogenic	PATHOGENIC	PVS1 | PS1 | PM2 | PP5	HRD deficient
BRCA2	32913381C>G	4889C>G	S1630*	stop gained	rs80358711	pathogenic	PATHOGENIC	PVS1 | PS1 | PP5	HRD deficient
BRCA2	32913385AA>A	4894del	S1632fs	frameshift variant	rs1555283980	pathogenic	PATHOGENIC	PVS1 | PS1 | PM2 | PP5	HRD deficient
BRCA2	32913385AAG>A	4894_4895del	S1632fs	frameshift variant	rs397507748	pathogenic	PATHOGENIC	PVS1 | PS1 | PM2 | PP5	HRD deficient
BRCA2	32913396T>A	4904T>A	L1635*	stop gained	rs886038110	pathogenic	PATHOGENIC	PVS1 | PS1 | PM2 | PP5	HRD deficient
BRCA2	32913396T>TT	4904dup	L1635fs	frameshift variant	rs80359471	pathogenic	PATHOGENIC	PVS1 | PS1 | PM2 | PP5	HRD deficient
BRCA2	32913400AG>A	4909del	V1637fs	frameshift variant	rs1064794377	pathogenic	PATHOGENIC	PVS1 | PS1 | PM2 | PP5	HRD deficient
BRCA2	32913404A>T	4912A>T	K1638*	stop gained	rs886040553	pathogenic	PATHOGENIC	PVS1 | PS1 | PM2 | PP5	HRD deficient
BRCA2	32913406A>AA	4914dup	V1639fs	frameshift variant	rs786203494	pathogenic	PATHOGENIC	PVS1 | PS1 | PM2 | PP5	HRD deficient
BRCA2	32913408TA>T	4917del	H1640fs	frameshift variant	rs397507749	pathogenic	PATHOGENIC	PVS1 | PS1 | PM2 | PP5	HRD deficient
BRCA2	32913412TGAAA>T	4921_4924del	E1641fs	frameshift variant	rs397507344	pathogenic	PATHOGENIC	PVS1 | PS1 | PM2 | PP5	HRD deficient
BRCA2	32913417ATGTAGAAAAA>A	4926_4935del	N1642fs	frameshift variant	rs397507750	pathogenic	PATHOGENIC	PVS1 | PS1 | PM2 | PP5	HRD deficient
BRCA2	32913421A>G	4929A>G	V1643=	synonymous codon	rs876658757	likely benign	VUS	PM2
BRCA2	32913421AGAAAAAGA>A	4930_4937del	E1644fs	frameshift variant	rs886040554	pathogenic	PATHOGENIC	PVS1 | PS1 | PM2 | PP5	HRD deficient
BRCA2	32913425A>T	4933A>T	K1645*	stop gained	rs80358719	pathogenic	PATHOGENIC	PVS1 | PS1 | PM2 | PP5	HRD deficient
BRCA2	32913426AA>A	4935del	E1646fs	frameshift variant	rs80359472	pathogenic	PATHOGENIC	PVS1 | PS1 | PM2 | PP5	HRD deficient
BRCA2	32913427AG>A	4936del	E1646fs	frameshift variant	rs773286595	pathogenic	PATHOGENIC	PVS1 | PS1 | PM2 | PP5	HRD deficient
BRCA2	32913427AGA>A	4936_4937del	E1646fs	frameshift variant	rs431825323	pathogenic	PATHOGENIC	PVS1 | PS1 | PM2 | PP5	HRD deficient
BRCA2	32913427AGAAA>A	4936_4939del	E1646fs	frameshift variant	rs80359473	pathogenic	PATHOGENIC	PVS1 | PS1 | PM2 | PP5	HRD deficient
BRCA2	32913428G>T	4936G>T	E1646*	stop gained	rs886038111	pathogenic	PATHOGENIC	PVS1 | PS1 | PM2 | PP5	HRD deficient
BRCA2	32913430A>G	4938A>G	E1646=	synonymous codon	rs864622359	likely benign	VUS	PM2
BRCA2	32913431A>AA	4939dup	T1647fs	frameshift variant	rs886040555	pathogenic	PATHOGENIC	PVS1 | PS1 | PM2 | PP5	HRD deficient
BRCA2	32913431AC>A	4940del	T1647fs	frameshift variant	rs886038112	pathogenic	PATHOGENIC	PVS1 | PS1 | PM2 | PP5	HRD deficient
BRCA2	32913431ACA>A	4940_4941del	T1647fs	frameshift variant	rs397507751	pathogenic	PATHOGENIC	PVS1 | PS1 | PM2 | PP5	HRD deficient
BRCA2	32913433A>G	4941A>G	T1647=	synonymous codon	rs876659398	likely benign	VUS	PM2
BRCA2	32913438AAA>A	4947_4948del	P1651fs	frameshift variant	rs80359474	pathogenic	PATHOGENIC	PVS1 | PS1 | PM2 | PP5	HRD deficient
BRCA2	32913443CC>C	4952del	P1651fs	frameshift variant	rs397507752	pathogenic	PATHOGENIC	PVS1 | PS1 | PM2 | PP5	HRD deficient
BRCA2	32913452T>TT	4960dup	C1654fs	frameshift variant	rs886040556	pathogenic	PATHOGENIC	PVS1 | PS1 | PM2 | PP5	HRD deficient
BRCA2	32913454T>A	4962T>A	C1654*	stop gained	rs1057518638	pathogenic	PATHOGENIC	PVS1 | PS1 | PM2 | PP5	HRD deficient
BRCA2	32913454TT>T	4963del	Y1655fs	frameshift variant	rs886040557	pathogenic	PATHOGENIC	PVS1 | PS1 | PM2 | PP5	HRD deficient
BRCA2	32913456A>AA	4964dup	Y1655*	stop gained	rs398122789	pathogenic	PATHOGENIC	PVS1 | PS1 | PM2 | PP5	HRD deficient
BRCA2	32913456AC>A	4965del	Y1655*	stop gained	rs80359475	pathogenic	PATHOGENIC	PVS1 | PS1 | PM2 | PP5	HRD deficient
BRCA2	32913456AC>AGA	4965delinsGA	Y1655*	stop gained	rs886038113	pathogenic	PATHOGENIC	PVS1 | PS1 | PM2 | PP5	HRD deficient
BRCA2	32913457C>A	4965C>A	Y1655*	stop gained	rs80358721	pathogenic	PATHOGENIC	PVS1 | PS1 | PM2 | PP5	HRD deficient
BRCA2	32913457C>G	4965C>G	Y1655*	stop gained	rs80358721	pathogenic	PATHOGENIC	PVS1 | PS1 | PP5	HRD deficient
BRCA2	32913464C>T	4972C>T	Q1658*	stop gained	rs886038114	pathogenic	PATHOGENIC	PVS1 | PS1 | PM2 | PP5	HRD deficient
BRCA2	32913467T>TG	4975_4976insG	S1659fs	frameshift variant	rs1555284014	pathogenic	PATHOGENIC	PVS1 | PS1 | PM2 | PP5	HRD deficient
BRCA2	32913469C>T	4977C>T	S1659=	synonymous codon	rs45484897	likely benign	LIKELY BENIGN	BS1
BRCA2	32913472T>TG	4980_4981insG	Y1661fs	frameshift variant	rs1555284020	pathogenic	PATHOGENIC	PVS1 | PS1 | PM2 | PP5	HRD deficient
BRCA2	32913472TT>T	4981del	Y1661fs	frameshift variant	rs886040558	pathogenic	PATHOGENIC	PVS1 | PS1 | PM2 | PP5	HRD deficient
BRCA2	32913473T>TG	4981_4982insG	Y1661*	stop gained	rs80359476	pathogenic	PATHOGENIC	PVS1 | PS1 | PM2 | PP5	HRD deficient
BRCA2	32913475T>G	4983T>G	Y1661*	stop gained	rs1060499833	pathogenic	PATHOGENIC	PVS1 | PS1 | PM2 | PP5	HRD deficient
BRCA2	32913477C>G	4985C>G	S1662*	stop gained	rs886040559	pathogenic	PATHOGENIC	PVS1 | PS1 | PM2 | PP5	HRD deficient
BRCA2	32913478A>C	4986A>C	S1662=	synonymous codon	rs786202043	likely benign	VUS	PM2
BRCA2	32913478AGTCA>A	4987_4990del	V1663fs	frameshift variant	rs397507753	pathogenic	PATHOGENIC	PVS1 | PS1 | PM2 | PP5	HRD deficient
BRCA2	32913481CAT>C	4990_4991del	I1664*	stop gained	rs398122790	pathogenic	PATHOGENIC	PVS1 | PS1 | PM2 | PP5	HRD deficient
BRCA2	32913491T>TT	4999dup	S1667fs	frameshift variant	rs397507754	pathogenic	PATHOGENIC	PVS1 | PS1 | PM2 | PP5	HRD deficient
BRCA2	32913492C>G	5000C>G	S1667*	stop gained	rs397507346	pathogenic	PATHOGENIC	PVS1 | PS1 | PM2 | PP5	HRD deficient
BRCA2	32913506T>TT	5014dup	Y1672fs	frameshift variant	rs397507755	pathogenic	PATHOGENIC	PVS1 | PS1 | PM2 | PP5	HRD deficient
BRCA2	32913508C>G	5016C>G	Y1672*	stop gained	rs864622073	pathogenic	PATHOGENIC	PVS1 | PS1 | PM2 | PP5	HRD deficient
BRCA2	32913517T>C	5025T>C	C1675=	synonymous codon	rs370591460	likely benign	VUS	PM2
BRCA2	32913520T>C	5028T>C	S1676=	synonymous codon	rs762458631	likely benign	LIKELY BENIGN	BS1
BRCA2	32913526AA>A	5035del	T1679fs	frameshift variant	rs80359477	pathogenic	PATHOGENIC	PVS1 | PS1 | PM2 | PP5	HRD deficient
BRCA2	32913530TCT>T	5039_5040del	S1680fs	frameshift variant	rs886040560	pathogenic	PATHOGENIC	PVS1 | PS1 | PM2 | PP5	HRD deficient
BRCA2	32913531CTG>C	5042_5043del	V1681fs	frameshift variant	rs80359478	pathogenic	PATHOGENIC	PVS1 | PS1 | PM2 | PP5	HRD deficient
BRCA2	32913536AG>A	5045del	S1682fs	frameshift variant	rs397507756	pathogenic	PATHOGENIC	PVS1 | PS1 | PM2 | PP5	HRD deficient
BRCA2	32913540AGA>A	5049_5050del	Q1683fs	frameshift variant	rs886040561	pathogenic	PATHOGENIC	PVS1 | PS1 | PM2 | PP5	HRD deficient
BRCA2	32913541G>A	5049G>A	Q1683=	synonymous codon	rs773973434	likely benign	VUS	-
BRCA2	32913541GACTTCATTACTTGAAG>G	5050_5065del	T1684fs	frameshift variant	rs886040562	pathogenic	PATHOGENIC	PVS1 | PS1 | PM2 | PP5	HRD deficient
BRCA2	32913546C>A	5054C>A	S1685*	stop gained	rs398122791	pathogenic	PATHOGENIC	PVS1 | PS1 | PM2 | PP5	HRD deficient
BRCA2	32913547A>G	5055A>G	S1685=	synonymous codon	rs587780654	likely benign	VUS	PM2
BRCA2	32913549T>A	5057T>A	L1686*	stop gained	rs886038115	pathogenic	PATHOGENIC	PVS1 | PS1 | PM2 | PP5	HRD deficient
BRCA2	32913556AGC>AAAA	5065_5066delinsAAA	A1689fs	frameshift variant	rs276174852	pathogenic	PATHOGENIC	PVS1 | PS1 | PM2 | PP5	HRD deficient
BRCA2	32913561AAAAA>A	5070_5073del	K1690fs	frameshift variant	rs80359479	pathogenic	PATHOGENIC	PVS1 | PS1 | PM2 | PP5	HRD deficient
BRCA2	32913562A>C	5070A>C	K1690N	missense	rs56087561	benign	BENIGN	BA1 | BS1 | BS3 | BP6	neutral
BRCA2	32913563A>T	5071A>T	K1691*	stop gained	rs886038116	pathogenic	PATHOGENIC	PVS1 | PS1 | PM2 | PP5	HRD deficient
BRCA2	32913564AA>A	5073del	K1691fs	frameshift variant	rs80359479	pathogenic	PATHOGENIC	PVS1 | PS1 | PM2 | PP5	HRD deficient
BRCA2	32913565A>AA	5073dup	W1692fs	frameshift variant	rs80359479	pathogenic	PATHOGENIC	PVS1 | PS1 | PP5	HRD deficient
BRCA2	32913566T>TA	5074_5075insA	W1692*	stop gained	rs80359482	pathogenic	PATHOGENIC	PVS1 | PS1 | PM2 | PP5	HRD deficient
BRCA2	32913567GG>G	5076del	W1692fs	frameshift variant	rs876660524	pathogenic	PATHOGENIC	PVS1 | PS1 | PM2 | PP5	HRD deficient
BRCA2	32913572A>T	5080A>T	R1694*	stop gained	rs200265692	pathogenic	PATHOGENIC	PVS1 | PS1 | PM2 | PP5	HRD deficient
BRCA2	32913577A>AA	5085dup	G1696fs	frameshift variant	rs1555284062	pathogenic	PATHOGENIC	PVS1 | PS1 | PM2 | PP5	HRD deficient
BRCA2	32913578G>GA	5086_5087insA	G1696fs	frameshift variant	rs397507757	pathogenic	PATHOGENIC	PVS1 | PS1 | PM2 | PP5	HRD deficient
BRCA2	32913593C>T	5101C>T	Q1701*	stop gained	rs397507758	pathogenic	PATHOGENIC	PVS1 | PS1 | PM2 | PP5	HRD deficient
BRCA2	32913597CAGAA>C	5110_5113del	R1704*	stop gained	rs879254123	pathogenic	PATHOGENIC	PVS1 | PS1 | PM2 | PP5 | BS1	HRD deficient
BRCA2	32913598A>G	5106A>G	P1702=	synonymous codon	rs781587561	likely benign	VUS	-
BRCA2	32913599G>T	5107G>T	E1703*	stop gained	rs80358735	pathogenic	PATHOGENIC	PVS1 | PS1 | PM2 | PP5	HRD deficient
BRCA2	32913601AA>A	5110del	R1704fs	frameshift variant	rs886040564	pathogenic	PATHOGENIC	PVS1 | PS1 | PM2 | PP5	HRD deficient
BRCA2	32913602A>T	5110A>T	R1704*	stop gained	rs1064795652	pathogenic	PATHOGENIC	PVS1 | PS1 | PM2 | PP5	HRD deficient
BRCA2	32913603GAATA>G	5116_5119del	N1706fs	frameshift variant	rs276174853	pathogenic	PATHOGENIC	PVS1 | PS1 | PM2 | PP5	HRD deficient
BRCA2	32913606TAAATA>T	5115_5119del	N1706fs	frameshift variant	rs397507759	pathogenic	PATHOGENIC	PVS1 | PS1 | PM2 | PP5	HRD deficient
BRCA2	32913606TAAATA>TG	5115_5119delinsG	I1705fs	frameshift variant	rs886040565	pathogenic	PATHOGENIC	PVS1 | PM2 | PP5	HRD deficient
BRCA2	32913610TACTG>T	5119_5122del	T1707fs	frameshift variant	rs886040566	pathogenic	PATHOGENIC	PVS1 | PS1 | PM2 | PP5	HRD deficient
BRCA2	32913611A>AA	5119dup	T1707fs	frameshift variant	rs886040567	pathogenic	PATHOGENIC	PVS1 | PS1 | PM2 | PP5	HRD deficient
BRCA2	32913611AC>A	5120del	T1707fs	frameshift variant	rs886039318	pathogenic	PATHOGENIC	PVS1 | PS1 | PM2 | PP5	HRD deficient
BRCA2	32913616A>T	5124A>T	A1708=	synonymous codon	rs780535833	likely benign	VUS	PM2
BRCA2	32913616AGATTA>A	5125_5129del	D1709fs	frameshift variant	rs886040568	pathogenic	PATHOGENIC	PVS1 | PS1 | PM2 | PP5	HRD deficient
BRCA2	32913621AT>A	5130del	Y1710*	stop gained	rs886038118	pathogenic	PATHOGENIC	PVS1 | PS1 | PM2 | PP5	HRD deficient
BRCA2	32913621ATGTA>A	5130_5133del	Y1710*	stop gained	rs80359484	pathogenic	PATHOGENIC	PVS1 | PS1 | PM2 | PP5	HRD deficient
BRCA2	32913622TG>T	5131del	V1711*	stop gained	rs397507760	pathogenic	PATHOGENIC	PVS1 | PS1 | PM2 | PP5	HRD deficient
BRCA2	32913623GTAGG>G	5132_5135del	V1711fs	frameshift variant	rs80359486	pathogenic	PATHOGENIC	PVS1 | PS1 | PM2 | PP5	HRD deficient
BRCA2	32913625A>G	5133A>G	V1711=	synonymous codon	rs749748066	likely benign	VUS	PM2
BRCA2	32913626G>T	5134G>T	G1712*	stop gained	rs876661056	pathogenic	PATHOGENIC	PVS1 | PS1 | PM2 | PP5	HRD deficient
BRCA2	32913629AA>A	5138del	N1713fs	frameshift variant	rs886038120	pathogenic	PATHOGENIC	PVS1 | PS1 | PM2 | PP5	HRD deficient
BRCA2	32913632TATTT>T	5141_5144del	Y1714fs	frameshift variant	rs80359487	pathogenic	PATHOGENIC	PVS1 | PS1 | PM2 | PP5	HRD deficient
BRCA2	32913637GTATG>G	5146_5149del	Y1716fs	frameshift variant	rs276174854	pathogenic	PATHOGENIC	PVS1 | PS1 | PM2 | PP5	HRD deficient
BRCA2	32913640TG>T	5149del	E1717fs	frameshift variant	rs886040569	pathogenic	PATHOGENIC	PVS1 | PS1 | PM2 | PP5	HRD deficient
BRCA2	32913645ATAATT>A	5154_5158del	N1719fs	frameshift variant	rs886040570	pathogenic	PATHOGENIC	PVS1 | PS1 | PM2 | PP5	HRD deficient
BRCA2	32913648ATTCA>A	5157_5160del	N1719fs	frameshift variant	rs886040571	pathogenic	PATHOGENIC	PVS1 | PS1 | PM2 | PP5	HRD deficient
BRCA2	32913648ATTCAA>A	5157_5161del	N1719fs	frameshift variant	rs80359488	pathogenic	PATHOGENIC	PVS1 | PS1 | PM2 | PP5	HRD deficient
BRCA2	32913650T>TT	5158dup	S1720fs	frameshift variant	rs80359489	pathogenic	PATHOGENIC	PVS1 | PS1 | PM2 | PP5	HRD deficient
BRCA2	32913651C>A	5159C>A	S1720*	stop gained	rs80358740	pathogenic	PATHOGENIC	PVS1 | PS1 | PM2 | PP5	HRD deficient
BRCA2	32913651C>G	5159C>G	S1720*	stop gained	rs80358740	pathogenic	PATHOGENIC	PVS1 | PS1 | PM2 | PP5	HRD deficient
BRCA2	32913651CAAACAGTAC>CTACAA	5160_5168delinsTACAA	N1721fs	frameshift variant	rs886040572	pathogenic	PATHOGENIC	PVS1 | PS1 | PM2 | PP5	HRD deficient
BRCA2	32913652AAACA>A	5161_5164del	N1721fs	frameshift variant	rs1057519559	pathogenic	PATHOGENIC	PVS1 | PS1 | PM2 | PP5	HRD deficient
BRCA2	32913655CAG>C	5164_5165del	S1722fs	frameshift variant	rs80359490	pathogenic	PATHOGENIC	PVS1 | PS1 | PP5 | BS1	HRD deficient
BRCA2	32913658T>TT	5166dup	T1723fs	frameshift variant	rs869320794	pathogenic	PATHOGENIC	PVS1 | PS1 | PM2 | PP5	HRD deficient
BRCA2	32913660C>CAGTAC	5164_5168dup	I1724fs	frameshift variant	rs397507765	pathogenic	PATHOGENIC	PVS1 | PS1 | PM2 | PP5	HRD deficient
BRCA2	32913660CTA>C	5171_5172del	I1724fs	frameshift variant	rs587782075	pathogenic	PATHOGENIC	PVS1 | PS1 | PM2	HRD deficient
BRCA2	32913662A>AA	5170dup	I1724fs	frameshift variant	rs886038121	pathogenic	PATHOGENIC	PVS1 | PS1 | PM2 | PP5	HRD deficient
BRCA2	32913662AT>A	5171del	I1724fs	frameshift variant	rs397507767	pathogenic	PATHOGENIC	PVS1 | PS1 | PM2 | PP5	HRD deficient
BRCA2	32913671AA>A	5180del	N1727fs	frameshift variant	rs80359491	pathogenic	PATHOGENIC	PVS1 | PS1 | PM2 | PP5	HRD deficient
BRCA2	32913672A>AA	5180dup	N1727fs	frameshift variant	rs80359491	pathogenic	PATHOGENIC	PVS1 | PS1 | PM2 | PP5	HRD deficient
BRCA2	32913675ACA>A	5184_5185del	D1728fs	frameshift variant	rs1555284094	pathogenic	PATHOGENIC	PVS1 | PS1 | PM2 | PP5	HRD deficient
BRCA2	32913684ATC>A	5197_5198del	S1733fs	frameshift variant	rs876660228	pathogenic	PATHOGENIC	PVS1 | PS1 | PM2 | PP5	HRD deficient
BRCA2	32913686CT>C	5195del	L1732fs	frameshift variant	rs587779363	pathogenic	PATHOGENIC	PVS1 | PS1 | PM2 | PP5	HRD deficient
BRCA2	32913689T>TT	5197dup	S1733fs	frameshift variant	rs397507771	pathogenic	PATHOGENIC	PVS1 | PS1 | PM2 | PP5	HRD deficient
BRCA2	32913690C>T	5198C>T	S1733F	missense	rs55639415	benign	BENIGN	BS1 | BS3 | BP1 | BP4 | BP6	neutral
BRCA2	32913691C>CCC	5198_5199dup	E1734fs	frameshift variant	rs886040573	pathogenic	PATHOGENIC	PVS1 | PS1 | PM2 | PP5	HRD deficient
BRCA2	32913691C>T	5199C>T	S1733=	synonymous codon	rs28897734	benign	BENIGN	BA1 | BP6	neutral
BRCA2	32913692G>T	5200G>T	E1734*	stop gained	rs786202543	pathogenic	PATHOGENIC	PVS1 | PS1 | PM2 | PP5	HRD deficient
BRCA2	32913692GAAAAA>GGAAAAG	5201_5205delinsGAAAAG	E1734fs	frameshift variant	rs483353082	pathogenic	PATHOGENIC	PVS1 | PS1 | PM2 | PP5	HRD deficient
BRCA2	32913696AA>A	5205del	K1735fs	frameshift variant	rs483353082	pathogenic	PATHOGENIC	PVS1 | PS1 | PM2 | PP5	HRD deficient
BRCA2	32913696AACAA>A	5205_5208del	Q1736fs	frameshift variant	rs886040575	pathogenic	PATHOGENIC	PVS1 | PS1 | PM2 | PP5	HRD deficient
BRCA2	32913697A>G	5205A>G	K1735=	synonymous codon	rs1131692115	likely benign	VUS	PM2
BRCA2	32913698C>T	5206C>T	Q1736*	stop gained	rs886037802	pathogenic	PATHOGENIC	PVS1 | PS1 | PM2 | PP5	HRD deficient
BRCA2	32913698CAA>C	5207_5208del	Q1736fs	frameshift variant	rs397507773	pathogenic	PATHOGENIC	PVS1 | PS1 | PM2 | PP5	HRD deficient
BRCA2	32913699AA>A	5208del	D1737fs	frameshift variant	rs397507774	pathogenic	PATHOGENIC	PVS1 | PS1 | PM2 | PP5	HRD deficient
BRCA2	32913704AC>A	5213del	T1738fs	frameshift variant	rs886040577	pathogenic	PATHOGENIC	PVS1 | PS1 | PM2 | PP5	HRD deficient
BRCA2	32913704ACTTA>A	5213_5216del	T1738fs	frameshift variant	rs80359493	pathogenic	PATHOGENIC	PVS1 | PS1 | PM2 | PP5	HRD deficient
BRCA2	32913706T>G	5214T>G	T1738=	synonymous codon	rs864622338	likely benign	LIKELY BENIGN	BS1
BRCA2	32913706TT>T	5215del	Y1739fs	frameshift variant	rs398122796	pathogenic	PATHOGENIC	PVS1 | PS1 | PM2 | PP5	HRD deficient
BRCA2	32913708A>AA	5216dup	Y1739*	stop gained	rs886040578	pathogenic	PATHOGENIC	PVS1 | PS1 | PM2 | PP5	HRD deficient
BRCA2	32913708ATT>AA	5217_5218delinsA	Y1739*	stop gained	rs886040579	pathogenic	PATHOGENIC	PVS1 | PS1 | PM2 | PP5	HRD deficient
BRCA2	32913708ATTTA>A	5217_5220del	Y1739*	stop gained	rs80359494	pathogenic	PATHOGENIC	PVS1 | PS1 | PM2 | PP5	HRD deficient
BRCA2	32913708ATTTAA>A	5217_5221del	Y1739*	stop gained	rs80359495	pathogenic	PATHOGENIC	PVS1 | PS1 | PM2 | PP5	HRD deficient
BRCA2	32913708ATTTAAGT>A	5217_5223del	Y1739*	stop gained	rs80359496	pathogenic	PATHOGENIC	PVS1 | PS1 | PM2 | PP5	HRD deficient
BRCA2	32913708ATTTAAGTA>A	5217_5224del	Y1739*	stop gained	rs80359497	pathogenic	PATHOGENIC	PVS1 | PS1 | PM2 | PP5	HRD deficient
BRCA2	32913709T>A	5217T>A	Y1739*	stop gained	rs80358746	pathogenic	PATHOGENIC	PVS1 | PS1 | PM2 | PP5	HRD deficient
BRCA2	32913709T>C	5217T>C	Y1739=	synonymous codon	rs80358746	likely benign	VUS	PM2
BRCA2	32913709TTTAAGTA>T	5218_5224del	L1740fs	frameshift variant	rs886040580	pathogenic	PATHOGENIC	PVS1 | PS1 | PM2 | PP5	HRD deficient
BRCA2	32913709TTTAAGTAACAGTAGCAT>T	5218_5234del	L1740fs	frameshift variant	rs886040581	pathogenic	PATHOGENIC	PVS1 | PS1 | PM2 | PP5	HRD deficient
BRCA2	32913710TT>T	5219del	L1740*	stop gained	rs886040582	pathogenic	PATHOGENIC	PVS1 | PS1 | PM2 | PP5	HRD deficient
BRCA2	32913711T>TT	5219dup	L1740fs	frameshift variant	rs886040582	pathogenic	PATHOGENIC	PVS1 | PS1 | PM2 | PP5	HRD deficient
BRCA2	32913712A>ATA	5219_5220dup	S1741*	stop gained	rs1555284115	pathogenic	PATHOGENIC	PVS1 | PS1 | PM2 | PP5	HRD deficient
BRCA2	32913712AAGTAA>AC	5221_5225delinsC	S1741fs	frameshift variant	rs786202798	pathogenic	PATHOGENIC	PVS1 | PS1 | PM2 | PP5	HRD deficient
BRCA2	32913713AGTAA>A	5222_5225del	S1741fs	frameshift variant	rs80359498	pathogenic	PATHOGENIC	PVS1 | PS1 | PM2 | PP5	HRD deficient
BRCA2	32913730T>TCT	5237_5238dup	N1747fs	frameshift variant	rs1555284127	pathogenic	PATHOGENIC	PVS1 | PS1 | PM2 | PP5	HRD deficient
BRCA2	32913730T>TT	5238dup	N1747*	stop gained	rs80359499	pathogenic	PATHOGENIC	PVS1 | PS1 | PM2 | PP5	HRD deficient
BRCA2	32913731A>AT	5239_5240insT	N1747fs	frameshift variant	rs80359500	pathogenic	PATHOGENIC	PVS1 | PS1 | PM2 | PP5	HRD deficient
BRCA2	32913732A>ATA	5240_5241insTA	S1748fs	frameshift variant	rs1555284129	pathogenic	PATHOGENIC	PVS1 | PS1 | PM2 | PP5	HRD deficient
BRCA2	32913732AC>A	5241del	N1747fs	frameshift variant	rs879255457	pathogenic	PATHOGENIC	PVS1 | PS1 | PM2 | PP5	HRD deficient
BRCA2	32913733C>CTA	5241_5242insTA	S1748*	stop gained	rs749980674	pathogenic	PATHOGENIC	PVS1 | PS1 | PM2 | PP5	HRD deficient
BRCA2	32913736C>T	5244C>T	S1748=	synonymous codon	rs398122528	likely benign	VUS	PM2
BRCA2	32913741CC>C	5250del	Y1751fs	frameshift variant	rs397507776	pathogenic	PATHOGENIC	PVS1 | PS1 | PM2 | PP5	HRD deficient
BRCA2	32913745C>A	5253C>A	Y1751*	stop gained	rs1555284133	pathogenic	PATHOGENIC	PVS1 | PS1 | PM2 | PP5	HRD deficient
BRCA2	32913745CC>C	5254del	H1752fs	frameshift variant	rs397507777	pathogenic	PATHOGENIC	PVS1 | PS1 | PM2 | PP5	HRD deficient
BRCA2	32913755G>T	5263G>T	E1755*	stop gained	rs886040584	pathogenic	PATHOGENIC	PVS1 | PS1 | PM2 | PP5	HRD deficient
BRCA2	32913757G>A	5265G>A	E1755=	synonymous codon	rs746649823	likely benign	VUS	PM2
BRCA2	32913757GGTAT>G	5266_5269del	V1756fs	frameshift variant	rs80359501	pathogenic	PATHOGENIC	PVS1 | PS1 | PM2 | PP5	HRD deficient
BRCA2	32913760A>G	5268A>G	V1756=	synonymous codon	rs199879914	likely benign	LIKELY BENIGN	BS1
BRCA2	32913761TATAA>T	5270_5273del	Y1757fs	frameshift variant	rs886040585	pathogenic	PATHOGENIC	PVS1 | PS1 | PM2 | PP5	HRD deficient
BRCA2	32913761TATAATGATTCAGGATAT>T	5270_5286del	Y1757fs	frameshift variant	rs80359502	pathogenic	PATHOGENIC	PVS1 | PS1 | PM2 | PP5	HRD deficient
BRCA2	32913771C>G	5279C>G	S1760*	stop gained	rs80358751	pathogenic	PATHOGENIC	PVS1 | PS1 | PM2 | PP5	HRD deficient
BRCA2	32913773G>T	5281G>T	G1761*	stop gained	rs886038122	pathogenic	PATHOGENIC	PVS1 | PS1 | PM2 | PP5	HRD deficient
BRCA2	32913777ATC>A	5290_5291del	S1764fs	frameshift variant	rs80359503	pathogenic	PATHOGENIC	PVS1 | PS1 | PM2 | PP5	HRD deficient
BRCA2	32913778T>A	5286T>A	Y1762*	stop gained	rs80358754	pathogenic	PATHOGENIC	PVS1 | PS1 | PM2 | PP5	HRD deficient
BRCA2	32913781C>T	5289C>T	L1763=	synonymous codon	rs763052573	likely benign	VUS	-
BRCA2	32913783C>G	5291C>G	S1764*	stop gained	rs397507778	pathogenic	PATHOGENIC	PVS1 | PS1 | PM2 | PP5	HRD deficient
BRCA2	32913785A>T	5293A>T	K1765*	stop gained	rs879255458	pathogenic	PATHOGENIC	PVS1 | PS1 | PM2 | PP5	HRD deficient
BRCA2	32913789AT>A	5298del	N1766fs	frameshift variant	rs886040586	pathogenic	PATHOGENIC	PVS1 | PS1 | PM2 | PP5	HRD deficient
BRCA2	32913789ATAAA>A	5298_5301del	K1767fs	frameshift variant	rs1064795500	pathogenic	PATHOGENIC	PVS1 | PS1 | PM2 | PP5	HRD deficient
BRCA2	32913790T>C	5298T>C	N1766=	synonymous codon	rs276174856	likely benign	VUS	PM2
BRCA2	32913794CTT>C	5303_5304del	L1768fs	frameshift variant	rs80359505	pathogenic	PATHOGENIC	PVS1 | PS1 | PM2 | PP5	HRD deficient
BRCA2	32913794CTTGATTCTG>CA	5303_5311delinsA	L1768fs	frameshift variant	rs886040587	pathogenic	PATHOGENIC	PVS1 | PS1 | PM2 | PP5	HRD deficient
BRCA2	32913795TT>T	5304del	D1769fs	frameshift variant	rs886038123	pathogenic	PATHOGENIC	PVS1 | PS1 | PM2 | PP5	HRD deficient
BRCA2	32913799T>C	5307T>C	D1769=	synonymous codon	rs767693329	likely benign	VUS	PM2
BRCA2	32913799TT>T	5308del	S1770fs	frameshift variant	rs876659236	pathogenic	PATHOGENIC	PVS1 | PS1 | PM2 | PP5	HRD deficient
BRCA2	32913804G>A	5312G>A	G1771D	missense	rs80358755	benign	BENIGN	BS1 | BS3 | BP1 | BP4 | BP6	neutral
BRCA2	32913811G>A	5319G>A	E1773=	synonymous codon	rs376257217	likely benign	VUS	-
BRCA2	32913817A>G	5325A>G	V1775=	synonymous codon	rs766659380	likely benign	LIKELY BENIGN	BS1
BRCA2	32913819T>TT	5327dup	L1776fs	frameshift variant	rs1555284173	pathogenic	PATHOGENIC	PVS1 | PS1 | PM2 | PP5	HRD deficient
BRCA2	32913820GAAGAAT>GG	5329_5334delinsG	K1777fs	frameshift variant	rs886040588	pathogenic	PATHOGENIC	PVS1 | PM2 | PP5	HRD deficient
BRCA2	32913825ATGTTGAA>A	5334_5340del	N1778fs	frameshift variant	rs876658888	pathogenic	PATHOGENIC	PVS1 | PS1 | PM2 | PP5	HRD deficient
BRCA2	32913830G>GG	5338dup	E1780fs	frameshift variant	rs886040589	pathogenic	PATHOGENIC	PVS1 | PS1 | PM2 | PP5	HRD deficient
BRCA2	32913834A>AA	5342dup	D1781fs	frameshift variant	rs1555284179	pathogenic	PATHOGENIC	PVS1 | PS1 | PM2 | PP5	HRD deficient
BRCA2	32913835TCA>T	5344_5345del	Q1782fs	frameshift variant	rs80359506	pathogenic	PATHOGENIC	PVS1 | PS1 | PM2 | PP5	HRD deficient
BRCA2	32913836C>T	5344C>T	Q1782*	stop gained	rs80358757	pathogenic	PATHOGENIC	PVS1 | PS1 | PM2 | PP5	HRD deficient
BRCA2	32913841AAA>A	5350_5351del	N1784fs	frameshift variant	rs80359507	pathogenic	PATHOGENIC	PVS1 | PS1 | PM2 | PP5	HRD deficient
BRCA2	32913841AAA>AT	5350_5351delinsT	N1784fs	frameshift variant	rs397507779	pathogenic	PATHOGENIC	PVS1 | PS1 | PM2 | PP5	HRD deficient
BRCA2	32913842AA>A	5351del	N1784fs	frameshift variant	rs80359507	pathogenic	PATHOGENIC	PVS1 | PS1 | PM2 | PP5	HRD deficient
BRCA2	32913842AAC>A	5353_5354del	T1785*	stop gained	rs397507780	pathogenic	PATHOGENIC	PVS1 | PS1 | PM2 | PP5	HRD deficient
BRCA2	32913843A>AA	5351dup	N1784fs	frameshift variant	rs80359507	pathogenic	PATHOGENIC	PVS1 | PS1 | PM2 | PP5	HRD deficient
BRCA2	32913843A>AAA	5350_5351dup	N1784fs	frameshift variant	rs80359507	pathogenic	PATHOGENIC	PVS1 | PS1 | PM2 | PP5	HRD deficient
BRCA2	32913843AC>A	5352del	N1784fs	frameshift variant	rs398122531	pathogenic	PATHOGENIC	PVS1 | PS1 | PM2 | PP5	HRD deficient
BRCA2	32913844C>CC	5352dup	T1785fs	frameshift variant	rs1555284188	pathogenic	PATHOGENIC	PVS1 | PS1 | PM2 | PP5	HRD deficient
BRCA2	32913844CA>C	5353del	T1785fs	frameshift variant	rs786202385	pathogenic	PATHOGENIC	PVS1 | PS1 | PM2 | PP5	HRD deficient
BRCA2	32913845A>AA	5353dup	T1785fs	frameshift variant	rs886040590	pathogenic	PATHOGENIC	PVS1 | PS1 | PM2 | PP5	HRD deficient
BRCA2	32913846CTA>C	5355_5356del	S1786fs	frameshift variant	rs1555284191	pathogenic	PATHOGENIC	PVS1 | PS1 | PM2 | PP5	HRD deficient
BRCA2	32913847T>TT	5355dup	S1786*	stop gained	rs397507781	pathogenic	PATHOGENIC	PVS1 | PS1 | PM2 | PP5	HRD deficient
BRCA2	32913848AG>A	5357del	S1786fs	frameshift variant	rs876659482	pathogenic	PATHOGENIC	PVS1 | PS1 | PM2 | PP5	HRD deficient
BRCA2	32913854T>TT	5362dup	S1788fs	frameshift variant	rs587781849	pathogenic	PATHOGENIC	PVS1 | PS1 | PM2 | PP5	HRD deficient
BRCA2	32913856C>CC	5364dup	K1789fs	frameshift variant	rs587779364	pathogenic	PATHOGENIC	PVS1 | PS1 | PM2 | PP5	HRD deficient
BRCA2	32913857A>T	5365A>T	K1789*	stop gained	rs587782240	pathogenic	PATHOGENIC	PVS1 | PS1 | PM2 | PP5	HRD deficient
BRCA2	32913869AA>A	5378del	N1793fs	frameshift variant	rs431825330	pathogenic	PATHOGENIC	PVS1 | PS1 | PM2 | PP5	HRD deficient
BRCA2	32913871T>C	5379T>C	N1793=	synonymous codon	rs146917776	likely benign	LIKELY BENIGN	BS1
BRCA2	32913871T>TTT	5379_5380insTT	V1794fs	frameshift variant	rs879255329	pathogenic	PATHOGENIC	PVS1 | PS1 | PM2 | PP5	HRD deficient
BRCA2	32913871TG>T	5380del	V1794*	stop gained	rs397507782	pathogenic	PATHOGENIC	PVS1 | PS1 | PM2 | PP5	HRD deficient
BRCA2	32913877AG>A	5386del	D1796fs	frameshift variant	rs587776467	pathogenic	PATHOGENIC	PVS1 | PS1 | PM2 | PP5	HRD deficient
BRCA2	32913877AGA>A	5386_5387del	D1796fs	frameshift variant	rs587782598	pathogenic	PATHOGENIC	PVS1 | PS1 | PM2 | PP5	HRD deficient
BRCA2	32913880TGC>T	5389_5390del	A1797fs	frameshift variant	rs397507783	pathogenic	PATHOGENIC	PVS1 | PS1 | PM2 | PP5	HRD deficient
BRCA2	32913881GC>G	5390del	A1797fs	frameshift variant	rs730882168	pathogenic	PATHOGENIC	PVS1 | PS1 | PM2 | PP5	HRD deficient
BRCA2	32913886T>C	5394T>C	N1798=	synonymous codon	rs786204276	likely benign	VUS	PM2
BRCA2	32913892C>G	5400C>G	Y1800*	stop gained	rs780919805	pathogenic	PATHOGENIC	PVS1 | PS1 | PM2 | PP5	HRD deficient
BRCA2	32913892C>T	5400C>T	Y1800=	synonymous codon	rs780919805	likely benign	VUS	PM2
BRCA2	32913896C>T	5404C>T	Q1802*	stop gained	rs80358763	pathogenic	PATHOGENIC	PVS1 | PS1 | PM2 | PP5	HRD deficient
BRCA2	32913901TGT>T	5410_5411del	V1804fs	frameshift variant	rs80359512	pathogenic	PATHOGENIC	PVS1 | PS1 | PM2 | PP5	HRD deficient
BRCA2	32913907T>TT	5415dup	E1806*	stop gained	rs1555284212	pathogenic	PATHOGENIC	PVS1 | PS1 | PM2 | PP5	HRD deficient
BRCA2	32913910A>G	5418A>G	E1806=	synonymous codon	rs34351119	benign	BENIGN	BA1 | BP6	neutral
BRCA2	32913911GAT>G	5422_5423del	I1808fs	frameshift variant	rs587781585	pathogenic	PATHOGENIC	PVS1 | PS1 | PM2 | PP5	HRD deficient
BRCA2	32913919C>T	5427C>T	C1809=	synonymous codon	rs80359791	likely benign	LIKELY BENIGN	BS1
BRCA2	32913924AGGAA>A	5433_5436del	E1811fs	frameshift variant	rs397507784	pathogenic	PATHOGENIC	PVS1 | PS1 | PM2 | PP5	HRD deficient
BRCA2	32913926G>T	5434G>T	E1812*	stop gained	rs80358767	pathogenic	PATHOGENIC	PVS1 | PS1 | PM2 | PP5	HRD deficient
BRCA2	32913927AA>A	5436del	E1812fs	frameshift variant	rs397507351	pathogenic	PATHOGENIC	PVS1 | PS1 | PM2 | PP5	HRD deficient
BRCA2	32913930TT>T	5439del	V1814*	stop gained	rs397507785	pathogenic	PATHOGENIC	PVS1 | PS1 | PM2 | PP5	HRD deficient
BRCA2	32913937T>C	5445T>C	T1815=	synonymous codon	rs878853589	likely benign	VUS	PM2
[truncated: 5,209 more rows]

## Sheet: ARUP
Gene	g.HGVS	c.HGVS	p.HGVS	Type	SNP-ID number	ARUP classification	MH BRCA ACMG	MH BRCA ACMG criteria	MH Guide predicted PARPi response
BRCA2	32890572G>A	-26G>A		utr variant 5 prime	rs1799943	benign	BENIGN	BA1 | BP6	neutral
BRCA2	32890583A>C	-15A>C		utr variant 5 prime	rs138705202	likely benign	LIKELY BENIGN	BS1
BRCA2	32890587C>T	-11C>T		utr variant 5 prime	rs76874770	benign	BENIGN	BA1 | BS3 | BP6	neutral
BRCA2	32890726T>G	67+62T>G		intron variant	rs11571574	benign	LIKELY BENIGN	BS1
BRCA2	32893271A>G	125A>G	Y42C	missense	rs4987046	benign	BENIGN	BS1 | BS3 | BP1 | BP4 | BP6	neutral
BRCA2	32893321C>G	175C>G	P59A	missense	rs56091799	likely benign	BENIGN	BS1 | BS3 | BP1 | BP4	neutral
BRCA2	32893369G>C	223G>C	A75P	missense	rs28897701	likely benign	LIKELY BENIGN	BS1 | BP1 | BP4 | BP6 | PS3	likely HRD proficient
BRCA2	32893377T>G	231T>G	T77=	synonymous codon	rs114446594	benign	BENIGN	BS1 | BS3 | BP6	neutral
BRCA2	32893474A>G	316+12A>G		intron variant	rs186419778	benign	LIKELY BENIGN	BS1
BRCA2	32899239A>G	343A>G	K115E	missense	rs56242644	VUS	LIKELY BENIGN	BP1 | BP4
BRCA2	32899248C>T	352C>T	R118C	missense	rs375125172	VUS	LIKELY BENIGN	BS1 |BP1 | BP4
BRCA2	32900201T>A	426-37T>A		intron variant	rs81002859	benign	LIKELY BENIGN	BS1
BRCA2	32900252A>G	440A>G	Q147R	missense	rs80358674	likely benign	LIKELY BENIGN	BS1 |BP1 | BP4
BRCA2	32900440A>T	516+21A>T		intron variant	rs11571622	benign	BENIGN	BA1 | BS3 | BP6	neutral
BRCA2	32900617C>T	517-19C>T		intron variant	rs11571623	benign	BENIGN	BA1 | BS3 | BP6	neutral
BRCA2	32900690GAT>G	574_575del	M192fs	frameshift variant	rs80359533	pathogenic	PATHOGENIC	PVS1 | PS1 | PM2 | PP5	HRD deficient
BRCA2	32900700G>A	581G>A	W194*	stop gained	rs80358809	pathogenic	PATHOGENIC	PVS1 | PS1 | PM2 | PP5	HRD deficient
BRCA2	32903605TGT>T	658_659del	V220fs	frameshift variant	rs80359604	pathogenic	PATHOGENIC	PVS1 | PS1 | PM2 | PP5	HRD deficient
BRCA2	32905124GACAG>G	755_758del	D252fs	frameshift variant	rs80359659	pathogenic	PATHOGENIC	PVS1 | PS1 | PM2 | PP5	HRD deficient
BRCA2	32906471T>C	856T>C	S286P	missense	rs80359111	likely benign	LIKELY BENIGN	BS1 |BP1 | BP4
BRCA2	32906480A>C	865A>C	N289H	missense	rs766173	benign	BENIGN	BA1 | BS3 | BP1 | BP4 | BP6	neutral
BRCA2	32906544TAT>T	930_931del	C311fs	frameshift variant	rs80359755	pathogenic	PATHOGENIC	PVS1 | PS1 | PM2 | PP5	HRD deficient
BRCA2	32906593C>A	978C>A	S326R	missense	rs28897706	benign	BENIGN	BS1 | BS3 | BP1 | BP4 | BP6	neutral
BRCA2	32906636T>C	1021T>C	C341R	missense	rs55833327	VUS	LIKELY BENIGN	BS1 |BP1 | BP4
BRCA2	32906655A>G	1040A>G	Q347R	missense	rs55800493	likely benign	LIKELY BENIGN	BS1 |BP1 | BP4
BRCA2	32906729A>C	1114A>C	N372H	missense	rs144848	benign	BENIGN	BA1 | BS3 | BP1 | BP4 | BP6	neutral
BRCA2	32906766C>T	1151C>T	S384F	missense	rs41293475	benign	BENIGN	BS1 | BS3 | BP1 | BP4 | BP6	neutral
BRCA2	32906782G>A	1167G>A	P389=	synonymous codon	rs148607710	likely benign	LIKELY BENIGN	BS1
BRCA2	32906803T>TTTAG	1188_1189insTTAG	Q397fs	frameshift variant	rs1555281767	pathogenic	PATHOGENIC	PVS1 | PS1 | PM2 | PP5	HRD deficient
BRCA2	32906879AA>A	1265del	N422fs	frameshift variant	rs80359273	pathogenic	PATHOGENIC	PVS1 | PS1 | PM2 | PP5	HRD deficient
BRCA2	32906890A>G	1275A>G	E425=	synonymous codon	rs34355306	benign	BENIGN	BA1 | BP6	neutral
BRCA2	32906930T>G	1315T>G	F439V	missense	rs80358420	VUS	LIKELY BENIGN	BP1 | BP4
BRCA2	32906943AG>A	1329del	N444fs	frameshift variant	rs869320781	pathogenic	PATHOGENIC	PVS1 | PS1 | PM2 | PP5	HRD deficient
BRCA2	32906977A>G	1362A>G	K454=	synonymous codon	rs55919657	benign	LIKELY BENIGN	BS1 | BP6
BRCA2	32906980A>G	1365A>G	S455=	synonymous codon	rs1801439	benign	BENIGN	BA1 | BP6	neutral
BRCA2	32907010A>C	1395A>C	V465=	synonymous codon	rs11571641	likely benign	BENIGN	BS1 | BS3	neutral
BRCA2	32907075C>A	1460C>A	A487E	missense	rs56390402	likely benign	BENIGN	BS1 | BS3 | BP1 | BP4	neutral
BRCA2	32907129T>C	1514T>C	I505T	missense	rs28897708	likely benign	LIKELY BENIGN	BS1 |BP1 | BP4
BRCA2	32907277T>G	1662T>G	C554W	missense	rs80358451	benign	BENIGN	BS1 | BS3 | BP1 | BP4 | BP6	neutral
BRCA2	32907285T>G	1670T>G	L557*	stop gained	rs80358452	pathogenic	PATHOGENIC	PVS1 | PS1 | PM2 | PP5	HRD deficient
BRCA2	32907334T>C	1719T>C	A573=	synonymous codon	rs1450934154	likely benign	VUS	PM2
BRCA2	32907369AGAAAA>A	1755_1759del	K585fs	frameshift variant	rs80359302	pathogenic	PATHOGENIC	PVS1 | PS1 | PM2 | PP5	HRD deficient
BRCA2	32907377AATAA>A	1763_1766del	N588fs	frameshift variant	rs80359303	pathogenic	PATHOGENIC	PVS1 | PS1 | PM2 | PP5	HRD deficient
BRCA2	32907401G>C	1786G>C	D596H	missense	rs56328701	likely benign	BENIGN	BS1 | BS3 | BP1 | BP4	neutral
BRCA2	32907403T>C	1788T>C	D596=	synonymous codon	rs11571642	benign	BENIGN	BA1 | BS3 | BP6	neutral
BRCA2	32907407A>G	1792A>G	T598A	missense	rs28897710	benign	BENIGN	BS1 | BS3 | BP1 | BP4	neutral
BRCA2	32907413T>C	1798T>C	Y600H	missense	rs75419644	likely benign	LIKELY BENIGN	BS1 |BP1 | BP4
BRCA2	32907440C>G	1825C>G	Q609E	missense	rs80358472	VUS	LIKELY BENIGN	BP1 | BP4 | PM2
BRCA2	32907447C>A	1832C>A	S611*	stop gained	rs80358474	pathogenic	PATHOGENIC	PVS1 | PS1 | PM2 | PP5	HRD deficient
BRCA2	32907500C>G	1885C>G	L629V	missense	rs398122734	VUS	LIKELY BENIGN	BP1 | BP4 | PM2
BRCA2	32907504C>T	1889C>T	T630I	missense	rs80358479	likely benign	BENIGN	BS1 | BS3 | BP1 | BP4 | BP6	neutral
BRCA2	32907545TT>T	1909+22del		intron variant	rs276174816	benign	BENIGN	BA1	neutral
BRCA2	32910403T>C	1911T>C	G637=	splice site extended	rs11571652	likely benign	LIKELY BENIGN	BS1 | BP4 | BP6
BRCA2	32910430C>T	1938C>T	S646=	synonymous codon	rs28897711	benign	LIKELY BENIGN	BS1 | BP6
BRCA2	32910456C>G	1964C>G	P655R	missense	rs28897712	benign	LIKELY BENIGN	BS3 | BP1 | BP4 | BP6	neutral
BRCA2	32910590TTATT>T	2103_2106del	F701fs	frameshift variant	rs80359324	pathogenic	PATHOGENIC	PVS1 | PS1 | PM2 | PP5	HRD deficient
BRCA2	32910596A>G	2104A>G	I702V	missense	rs774968533	VUS	LIKELY BENIGN	BP1 | BP4 | PM2
BRCA2	32910630A>T	2138A>T	Q713L	missense	rs55816687	likely benign	LIKELY BENIGN	BS1 |BP1 | BP4
BRCA2	32910700A>G	2208A>G	A736=	synonymous codon	rs144984153	benign	LIKELY BENIGN	BS1
BRCA2	32910721T>C	2229T>C	H743=	synonymous codon	rs1801499	benign	BENIGN	BA1 | BP6	neutral
BRCA2	32910748C>T	2256C>T	D752=	synonymous codon	rs766384913	likely benign	LIKELY BENIGN	BS1
BRCA2	32910842A>G	2350A>G	M784V	missense	rs11571653	benign	BENIGN	BS1 | BS3 | BP1 | BP4 | BP6	neutral
BRCA2	32911278T>C	2786T>C	L929S	missense	rs2227943	benign	BENIGN	BA1 | BS3 | BP1 | BP4 | BP6	neutral
BRCA2	32911295G>A	2803G>A	D935N	missense	rs28897716	benign	BENIGN	BS1 | BS3 | BP1 | BP4 | BP6	neutral
BRCA2	32911299AACAA>A	2808_2811del	A938fs	frameshift variant	rs80359351	pathogenic	PATHOGENIC	PVS1 | PS1 | PM2 | PP5	HRD deficient
BRCA2	32911312A>G	2820A>G	Q940=	synonymous codon	rs771061558	likely benign	VUS	PM2
BRCA2	32911375G>A	2883G>A	Q961=	synonymous codon	rs11571655	benign	LIKELY BENIGN	BS1 | BP6
BRCA2	32911452A>T	2960A>T	N987I	missense	rs2227944	benign	BENIGN	BA1 | BS3 | BP1 | BP4 | BP6	neutral
BRCA2	32911463A>G	2971A>G	N991D	missense	rs1799944	benign	BENIGN	BA1 | BS3 | BP1 | BP4 | BP6	neutral
BRCA2	32911547C>G	3055C>G	L1019V	missense	rs55638633	benign	BENIGN	BS1 | BS3 | BP1 | BP4 | BP6	neutral
BRCA2	32911595G>T	3103G>T	E1035*	stop gained	rs80358556	pathogenic	PATHOGENIC	PVS1 | PS1 | PM2 | PP5	HRD deficient
BRCA2	32911756T>C	3264T>C	P1088=	synonymous codon	rs36060526	benign	BENIGN	BA1 | BP6	neutral
BRCA2	32911888A>G	3396A>G	K1132=	synonymous codon	rs1801406	benign	BENIGN	BA1 | BP6	neutral
BRCA2	32911909G>A	3417G>A	K1139=	synonymous codon	rs145625991	benign	LIKELY BENIGN	BS1
BRCA2	32911912T>C	3420T>C	S1140=	synonymous codon	rs118093942	benign	LIKELY BENIGN	BS1 | BP6
BRCA2	32912007C>T	3515C>T	S1172L	missense	rs80358600	benign	BENIGN	BA1 | BS3 | BP1 | BP4 | BP6	neutral
BRCA2	32912008G>A	3516G>A	S1172=	synonymous codon	rs1799952	benign	LIKELY BENIGN	BS1 | BP6
BRCA2	32912031A>G	3539A>G	K1180R	missense	rs28897720	VUS	LIKELY BENIGN	BP1 | BP4
BRCA2	32912036TTT>T	3545_3546del	F1182*	stop gained	rs80359388	pathogenic	PATHOGENIC	PVS1 | PS1 | PM2 | PP5	HRD deficient
BRCA2	32912067T>G	3575T>G	F1192C	missense	rs80358606	VUS	LIKELY BENIGN	BS1 |BP1 | BP4
BRCA2	32912153T>C	3661T>C	S1221P	missense	rs80358611	VUS	VUS	BP1 | PP3
BRCA2	32912164C>T	3672C>T	G1224=	synonymous codon	rs587780650	likely benign	LIKELY BENIGN	BS1
BRCA2	32912180TC>T	3689del	S1230fs	frameshift variant	rs80359398	pathogenic	PATHOGENIC	PVS1 | PS1 | PM2 | PP5	HRD deficient
BRCA2	32912299T>C	3807T>C	V1269=	synonymous codon	rs543304	benign	BENIGN	BA1 | BP6	neutral
BRCA2	32912349AAAA>A	3858_3860del	K1286del	cds indel	rs80359406	likely benign	VUS	PM4
BRCA2	32912361G>A	3869G>A	C1290Y	missense	rs41293485	benign	BENIGN	BA1 | BP1 | BP4 | BP6	neutral
BRCA2	32912546G>T	4054G>T	D1352Y	missense	rs80358655	VUS	LIKELY BENIGN	BS3 | BP1 | BP4 | PM2	neutral
BRCA2	32912560G>A	4068G>A	L1356=	synonymous codon	rs28897724	benign	LIKELY BENIGN	BS1 | BP6
BRCA2	32912582A>C	4090A>C	I1364L	missense	rs56248502	benign	BENIGN	BA1 | BP1 | BP4 | BP6	neutral
BRCA2	32912702TCAAAT>T	4211_4215del	S1404*	stop gained	rs786203340	pathogenic	PATHOGENIC	PVS1 | PS1 | PM2 | PP5	HRD deficient
BRCA2	32912733C>T	4241C>T	T1414M	missense	rs70953664	benign	LIKELY BENIGN	BS1 | BP1 | BP4 | BP6
BRCA2	32912749AG>A	4258del	D1420fs	frameshift variant	rs80359436	pathogenic	PATHOGENIC	PVS1 | PS1 | PM2 | PP5	HRD deficient
BRCA2	32912750G>T	4258G>T	D1420Y	missense	rs28897727	benign	BENIGN	BA1 | BS3 | BP1 | BP4 | BP6	neutral
BRCA2	32912763C>G	4271C>G	S1424C	missense	rs80358664	likely benign	LIKELY BENIGN	BS3 | BP1 | BP4	neutral
BRCA2	32912953ACA>A	4464_4465del	H1488fs	frameshift variant	rs397507720	pathogenic	PATHOGENIC	PVS1 | PS1 | PM2 | PP5	HRD deficient
BRCA2	32912965GAAAG>G	4478_4481del	E1493fs	frameshift variant	rs80359454	pathogenic	PATHOGENIC	PVS1 | PS1 | PM2 | PP5	HRD deficient
BRCA2	32913005A>G	4513A>G	T1505A	missense	rs80358682	VUS	LIKELY BENIGN	BP1 | BP4 | PM2
BRCA2	32913026C>T	4534C>T	R1512C	missense	rs80358684	VUS	LIKELY BENIGN	BP1 | BP4
BRCA2	32913055A>G	4563A>G	L1521=	synonymous codon	rs206075	benign	BENIGN	BA1 | BP6	neutral
BRCA2	32913076C>T	4584C>T	S1528=	synonymous codon	rs80359788	benign	LIKELY BENIGN	BS1
BRCA2	32913077G>A	4585G>A	G1529R	missense	rs28897728	likely benign	BENIGN	BS1 | BS3 | BP1 | BP6 | PP3	neutral
BRCA2	32913122AA>A	4631del	N1544fs	frameshift variant	rs80359460	pathogenic	PATHOGENIC	PVS1 | PS1 | PM2 | PP5	HRD deficient
BRCA2	32913173C>A	4681C>A	H1561N	missense	rs2219594	benign	LIKELY BENIGN	BS1 |BP1 | BP4
BRCA2	32913178A>G	4686A>G	Q1562=	synonymous codon	rs28897730	benign	LIKELY BENIGN	BS1
BRCA2	32913181G>A	4689G>A	W1563*	stop gained	rs886038108	pathogenic	PATHOGENIC	PVS1 | PS1 | PP5 | BS1	HRD deficient
BRCA2	32913457C>G	4965C>G	Y1655*	stop gained	rs80358721	pathogenic	PATHOGENIC	PVS1 | PS1 | PP5	HRD deficient
BRCA2	32913562A>C	5070A>C	K1690N	missense	rs56087561	benign	BENIGN	BS1 | BS3 | BP1 | BP6	neutral
BRCA2	32913690C>T	5198C>T	S1733F	missense	rs55639415	likely benign	BENIGN	BS1 | BS3 | BP1 | BP4 | BP6	neutral
BRCA2	32913691C>T	5199C>T	S1733=	synonymous codon	rs28897734	benign	BENIGN	BA1 | BP6	neutral
BRCA2	32913708ATTTAAGT>A	5217_5223del	Y1739*	stop gained	rs80359496	pathogenic	PATHOGENIC	PVS1 | PS1 | PM2 | PP5	HRD deficient
BRCA2	32913804G>A	5312G>A	G1771D	missense	rs80358755	benign	BENIGN	BS1 | BS3 | BP1 | BP4 | BP6	neutral
BRCA2	32913841AAA>A	5350_5351del	N1784fs	frameshift variant	rs80359507	pathogenic	PATHOGENIC	PVS1 | PS1 | PM2 | PP5	HRD deficient
BRCA2	32913906A>G	5414A>G	N1805S	missense	rs80358765	VUS	LIKELY BENIGN	BS1 |BP1 | BP4
BRCA2	32913910A>G	5418A>G	E1806=	synonymous codon	rs34351119	benign	BENIGN	BA1 | BP6	neutral
BRCA2	32913919C>T	5427C>T	C1809=	synonymous codon	rs80359791	likely benign	LIKELY BENIGN	BS1
BRCA2	32913947C>T	5455C>T	P1819S	missense	rs80358768	benign	BENIGN	BS1 | BS3 | BP1 | BP4 | BP6	neutral
BRCA2	32914067ATTAA>A	5576_5579del	I1859fs	frameshift variant	rs80359520	pathogenic	PATHOGENIC	PVS1 | PS1 | PM2 | PP5	HRD deficient
BRCA2	32914076GTGAA>G	5585_5588del	V1862fs	frameshift variant	rs80359523	pathogenic	PATHOGENIC	PVS1 | PS1 | PM2 | PP5	HRD deficient
BRCA2	32914104G>A	5612G>A	S1871N	missense	rs80358782	VUS	LIKELY BENIGN	BS1 |BP1 | BP4
BRCA2	32914127G>A	5635G>A	E1879K	missense	rs55996097	likely benign	LIKELY BENIGN	BS1 |BP1 | BP4
BRCA2	32914132T>G	5640T>G	N1880K	missense	rs11571657	benign	BENIGN	BS1 | BS3 | BP1 | BP4	neutral
BRCA2	32914196G>A	5704G>A	D1902N	missense	rs4987048	benign	BENIGN	BA1 | BP1 | BP4 | BP6	neutral
BRCA2	32914236C>T	5744C>T	T1915M	missense	rs4987117	benign	BENIGN	BA1 | BP1 | BP4 | BP6	neutral
BRCA2	32914260A>C	5768A>C	D1923A	missense	rs45491005	likely benign	LIKELY BENIGN	BS1 |BP1 | BP4
BRCA2	32914277A>G	5785A>G	I1929V	missense	rs79538375	likely benign	BENIGN	BS1 | BS3 | BP1 | BP4 | BP6	neutral
BRCA2	32914342TAGTT>T	5851_5854del	S1951fs	frameshift variant	rs80359543	pathogenic	PATHOGENIC	PVS1 | PS1 | PM2 | PP5	HRD deficient
BRCA2	32914356C>A	5864C>A	S1955*	stop gained	rs80358815	pathogenic	PATHOGENIC	PVS1 | PS1 | PP5 | BS1	HRD deficient
BRCA2	32914361A>G	5869A>G	I1957V	missense	rs80358817	VUS	LIKELY BENIGN	BP1 | BP4
BRCA2	32914371G>A	5879G>A	C1960Y	missense	rs56157628	likely benign	LIKELY BENIGN	BS1 |BP1 | BP4
BRCA2	32914437GT>G	5946del	S1982fs	frameshift variant	rs80359550	pathogenic	PATHOGENIC	PVS1 | PS1 | PP5 | BS1	HRD deficient
BRCA2	32914484C>T	5992C>T	Q1998*	stop gained	rs397507819	pathogenic	PATHOGENIC	PVS1 | PS1 | PM2 | PP5	HRD deficient
BRCA2	32914529A>T	6037A>T	K2013*	stop gained	rs80358840	pathogenic	PATHOGENIC	PVS1 | PS1 | PM2 | PP5	HRD deficient
BRCA2	32914549C>T	6057C>T	N2019=	synonymous codon	rs147961615	benign	LIKELY BENIGN	BS1 | BP6
BRCA2	32914592C>T	6100C>T	R2034C	missense	rs1799954	benign	BENIGN	BS1 | BS3 | BP1 | BP4 | BP6	neutral
BRCA2	32914635A>T	6143A>T	N2048I	missense	rs80358853	likely benign	LIKELY BENIGN	BS3 | BP1 | BP4 | BP6	neutral
BRCA2	32914712C>A	6220C>A	H2074N	missense	rs34309943	benign	BENIGN	BS1 | BS3 | BP1 | BP4 | BP6	neutral
BRCA2	32914747A>T	6255A>T	L2085F	missense	rs730881579	VUS	LIKELY BENIGN	BP1 | BP4 | PM2
BRCA2	32914766CTT>C	6275_6276del	L2092fs	frameshift variant	rs11571658	pathogenic	PATHOGENIC	PVS1 | PS1 | PP5 | BS1	HRD deficient
BRCA2	32914815G>A	6323G>A	R2108H	missense	rs35029074	benign	BENIGN	BS1 | BS3 | BP1 | BP4 | BP6	neutral
BRCA2	32914839A>G	6347A>G	H2116R	missense	rs55953736	benign	BENIGN	BA1 | BS3 | BP1 | BP4 | BP6	neutral
BRCA2	32914904G>T	6412G>T	V2138F	missense	rs11571659	benign	BENIGN	BA1 | BP1 | BP4	neutral
BRCA2	32914935C>T	6443C>T	S2148F	missense	rs80358880	VUS	LIKELY BENIGN	BP1 | BP4 | PM2
BRCA2	32915005G>C	6513G>C	V2171=	synonymous codon	rs206076	benign	BENIGN	BA1 | BP6	neutral
BRCA2	32915026T>TA	6534_6535insA	V2179fs	frameshift variant	rs1555284746	pathogenic	PATHOGENIC	PVS1 | PS1 | PM2 | PP5	HRD deficient
BRCA2	32915135TACTC>T	6644_6647del	Y2215fs	frameshift variant	rs80359616	pathogenic	PATHOGENIC	PVS1 | PS1 | PM2 | PP5	HRD deficient
BRCA2	32918706A>G	6853A>G	I2285V	missense	rs56272235	benign	BENIGN	BS1 | BS3 | BP1 | BP4 | BP6	neutral
BRCA2	32918728A>G	6875A>G	E2292G	missense	rs397507378	VUS	VUS	BP1 | PP3
BRCA2	32918774A>G	6921A>G	S2307=	synonymous codon	rs181183366	likely benign	LIKELY BENIGN	BS1
BRCA2	32919637T>G	6937+847T>G		intron variant	rs9567576	benign	BENIGN	BA1 | BP6	neutral
BRCA2	32929007G>C	7017G>C	K2339N	missense	rs45574331	benign	BENIGN	BA1 | BP1 | BP4 | BP6	neutral
BRCA2	32929042C>G	7052C>G	A2351G	missense	rs80358932	benign	BENIGN	BS1 | BS3 | BP1 | BP4	neutral
BRCA2	32929058TCT>T	7069_7070del	L2357fs	frameshift variant	rs80359636	pathogenic	PATHOGENIC	PVS1 | PS1 | PM2 | PP5	HRD deficient
BRCA2	32929140C>A	7150C>A	Q2384K	missense	rs55977008	benign	BENIGN	BS1 | BS3 | BP1 | BP4 | BP6	neutral
BRCA2	32929232A>G	7242A>G	S2414=	synonymous codon	rs1799955	benign	BENIGN	BA1 | BP6	neutral
BRCA2	32929232A>T	7242A>T	S2414=	synonymous codon	rs1799955	likely benign	VUS	BS3	neutral
BRCA2	32929307A>G	7317A>G	G2439=	synonymous codon	rs587780660	benign	VUS	-
BRCA2	32929309A>G	7319A>G	H2440R	missense	rs4986860	benign	BENIGN	BA1 | BS3 | BP1 | BP4 | BP6	neutral
BRCA2	32929387T>C	7397T>C	V2466A	missense	rs169547	benign	BENIGN	BA1 | BP1 | BP4 | BP6	neutral
BRCA2	32930535T>G	7436-30T>G		intron variant	rs925773518	likely benign	VUS	PM2
BRCA2	32930598T>C	7469T>C	I2490T	missense	rs11571707	benign	BENIGN	BA1 | BS3 | BP1 | BP4 | BP6 | PM1	neutral
BRCA2	32930633C>T	7504C>T	R2502C	missense	rs55716624	VUS	BENIGN	BS1 | BS3 | BP1 | BP4 | PM1	neutral
BRCA2	32930634G>A	7505G>A	R2502H	missense	rs56070345	likely benign	LIKELY BENIGN	BS1 | BP1 | BP4 | PM1
BRCA2	32930651G>A	7522G>A	G2508S	missense	rs80358978	VUS	BENIGN	BS1 | BS3 | BP1 | PM1 | PP3	neutral
BRCA2	32930673C>T	7544C>T	T2515I	missense	rs28897744	benign	BENIGN	BS1 | BS3 | BP1 | BP6 | PM1 | PP3	neutral
BRCA2	32930687C>T	7558C>T	R2520*	stop gained	rs80358981	pathogenic	PATHOGENIC	PVS1 | PS1 | PM1 | PP5 | BS1	HRD deficient
BRCA2	32930784A>G	7617+38A>G		intron variant	rs1555286323	likely benign	VUS	PM2
BRCA2	32931887G>A	7626G>A	T2542=	synonymous codon	rs61754138	benign	BENIGN	BS1 | BS3 | BP6 | PM1	neutral
BRCA2	32931891G>A	7630G>A	G2544S	missense	rs587781485	VUS	VUS	PM1 | PM2 | PP3 | BP1
BRCA2	32931942C>T	7681C>T	Q2561*	stop gained	rs80358994	pathogenic	PATHOGENIC	PVS1 | PS1 | PM1 | PM2 | PP5	HRD deficient
BRCA2	32932072C>G	7805+6C>G		splice site extended	rs81002819	benign	BENIGN	BS1 | BS3 | BP4	neutral
BRCA2	32936620A>G	7806-40A>G		intron variant	rs9590939	benign	BENIGN	BA1 | BS3 | BP6	neutral
BRCA2	32936630T>A	7806-30T>A		intron variant	rs1555286796	likely benign	VUS	PM2
BRCA2	32936646T>C	7806-14T>C		intron variant	rs9534262	benign	BENIGN	BA1 | BP6	neutral
BRCA2	32936665T>C	7811T>C	L2604P	missense	rs431825357	VUS	VUS	PM1 | PM2 | PP3 | BP1
BRCA2	32936766TTTCCT>T	7913_7917del	F2638*	stop gained	rs80359686	pathogenic	PATHOGENIC	PVS1 | PS1 | PM2 | PP5	HRD deficient
BRCA2	32936842G>A	7976+12G>A		intron variant	rs81002827	benign	LIKELY BENIGN	BS1
BRCA2	32937315G>C	7977-1G>C		splice acceptor variant	rs81002874	pathogenic	PATHOGENIC	PVS1 | PS3 | PP3 | PP5	HRD deficient
BRCA2	32937396T>C	8057T>C	L2686P	missense	rs28897746	likely pathogenic	LIKELY PATHOGENIC	PS3 | PM1 | PM2 | PP3 | BP1	HRD deficient
BRCA2	32937431G>A	8092G>A	A2698T	missense	rs80359052	VUS	LIKELY BENIGN	BS1 | BP1 | BP4 | PM1
BRCA2	32937463T>G	8124T>G	T2708=	synonymous codon	rs587780662	benign	VUS	PM1 | PM2
BRCA2	32937488G>T	8149G>T	A2717S	missense	rs28897747	benign	BENIGN	BS1 | BS3 | BP1 | BP6 | PM1	neutral
BRCA2	32937493T>C	8154T>C	I2718=	synonymous codon	rs148880015	benign	VUS	BS1 | PM1
BRCA2	32937506G>C	8167G>C	D2723H	missense	rs41293511	pathogenic	PATHOGENIC	PS1 | PS3 | PM1 | PM2 | PM5 | PP3 | PP5 | BP1	HRD deficient
BRCA2	32937521G>A	8182G>A	V2728I	missense	rs28897749	benign	BENIGN	BS1 | BS3 | BP1 | BP4 | PM1	neutral
BRCA2	32944559G>T	8352G>T	R2784=	synonymous codon	rs747664806	likely benign	VUS	BS1 | PM1
BRCA2	32944667A>C	8460A>C	V2820=	synonymous codon	rs9590940	benign	BENIGN	BA1 | BS3 | BP6 | PM1	neutral
BRCA2	32944713A>G	8487+19A>G		intron variant	rs11571743	benign	BENIGN	BA1 | BP6	neutral
BRCA2	32945108T>C	8503T>C	S2835P	missense	rs11571746	likely benign	LIKELY BENIGN	BS1 |BP1 | BP4
BRCA2	32945152GGAAG>G	8548_8551del	E2850fs	frameshift variant	rs397507406	pathogenic	PATHOGENIC	PVS1 | PS1 | PM2 | PP5	HRD deficient
BRCA2	32945172A>C	8567A>C	E2856A	missense	rs11571747	likely benign	BENIGN	BS1 | BS3 | BP1 | BP4	neutral
BRCA2	32950846CAA>C	8673_8674del	R2892fs	frameshift variant	rs80359724	pathogenic	PATHOGENIC	PVS1 | PS1 | PM2 | PP5	HRD deficient
BRCA2	32950860C>T	8686C>T	R2896C	missense	rs373203204	VUS	LIKELY BENIGN	BS1 |BP1 | BP4
BRCA2	32950869C>T	8695C>T	Q2899*	stop gained	rs397507411	pathogenic	PATHOGENIC	PVS1 | PS1 | PM2 | PP5	HRD deficient
BRCA2	32953182A>G	8755-272A>G		intron variant	rs4942485	benign	BENIGN	BA1 | BP6	neutral
BRCA2	32953529A>T	8830A>T	I2944F	missense	rs4987047	benign	BENIGN	BA1 | BS3 | BP1 | BP4 | BP6	neutral
BRCA2	32953536T>A	8837T>A	L2946*	stop gained	rs431825371	pathogenic	PATHOGENIC	PVS1 | PS1 | PM2 | PP5	HRD deficient
BRCA2	32953549G>T	8850G>T	K2950N	missense	rs28897754	likely benign	BENIGN	BS1 | BS3 | BP1 | BP4 | BP6	neutral
BRCA2	32953550G>A	8851G>A	A2951T	missense	rs11571769	benign	BENIGN	BA1 | BS3 | BP1 | BP4 | BP6	neutral
BRCA2	32953559T>C	8860T>C	S2954P	missense	rs886041145	VUS	LIKELY BENIGN	BP1 | BP4 | PM2
BRCA2	32953596TCA>T	8900_8901del	T2967fs	frameshift variant		pathogenic	LIKELY PATHOGENIC	PVS1 | PM2	HRD deficient
BRCA2	32953604G>A	8905G>A	V2969M	missense	rs59004709	likely benign	BENIGN	BS1 | BS3 | BP1 | BP4 | BP6	neutral
BRCA2	32953616C>T	8917C>T	R2973C	missense	rs45469092	benign	LIKELY BENIGN	BS3 | BP1 | BP6 | PP3	neutral
BRCA2	32953937G>A	9004G>A	E3002K	missense	rs80359152	pathogenic	LIKELY PATHOGENIC	PS3 | PM2 | PP3 | BP1	HRD deficient
BRCA2	32953971C>T	9038C>T	T3013I	missense	rs28897755	likely benign	BENIGN	BS1 | BS3 | BP1 | BP4	neutral
BRCA2	32954009C>T	9076C>T	Q3026*	stop gained	rs80359159	pathogenic	PATHOGENIC	PVS1 | PS1 | PM2 | PP5	HRD deficient
BRCA2	32954222C>T	9196C>T	Q3066*	stop gained	rs80359180	pathogenic	PATHOGENIC	PVS1 | PS1 | PM2 | PP5	HRD deficient
BRCA2	32954260CG>C	9235del	V3079fs	frameshift variant	rs397507422	pathogenic	PATHOGENIC	PVS1 | PS1 | PP5 | BS1	HRD deficient
BRCA2	32954261G>A	9235G>A	V3079I	missense	rs55933907	likely benign	BENIGN	BS1 | BS3 | BP1 | BP4 | BP6	neutral
BRCA2	32954279A>C	9253A>C	T3085P	missense	rs397507423	likely benign	LIKELY BENIGN	BS1 |BP1 | BP4
BRCA2	32968810T>C	9257-16T>C		intron variant	rs11571818	benign	BENIGN	BA1 | BS3 | BP6	neutral
BRCA2	32968844A>G	9275A>G	Y3092C	missense	rs80359195	likely benign	BENIGN	BS1 | BS3 | BP1 | PP3	neutral
BRCA2	32968853A>G	9284A>G	D3095G	missense	rs1060502443	VUS	VUS	PM2 | PP3 | BP1
BRCA2	32968861T>C	9292T>C	Y3098H	missense	rs41293521	likely benign	BENIGN	BS1 | BS3 | BP1 | BP4 | BP6	neutral
BRCA2	32968863C>G	9294C>G	Y3098*	stop gained	rs80359200	pathogenic	PATHOGENIC	PVS1 | PS1 | PP5	HRD deficient
BRCA2	32969062A>G	9493A>G	T3165A	missense	rs587782568	VUS	LIKELY BENIGN	BS1 |BP1 | BP4
BRCA2	32969078T>C	9501+8T>C		splice site extended	rs1555289625	VUS	VUS	PM2 | BP4
BRCA2	32969079A>C	9501+9A>C		intron variant	rs81002867	benign	BENIGN	BS1 | BS3	neutral
BRCA2	32971042A>G	9509A>G	D3170G	missense	rs80359224	benign	LIKELY BENIGN	BS3 | BP1 | BP4 | BP6 | PM2	neutral
BRCA2	32971125T>C	9592T>C	C3198R	missense	rs80359229	benign	BENIGN	BS1 | BS3 | BP1 | BP4 | BP6	neutral
BRCA2	32971167G>C	9634G>C	G3212R	missense	rs55775473	likely benign	LIKELY BENIGN	BS1 |BP1 | BP4
BRCA2	32972279C>T	9649-20C>T		intron variant	rs56177715	benign	BENIGN	BS1 | BS3 | BP6	neutral
BRCA2	32972280G>A	9649-19G>A		intron variant	rs11571830	benign	BENIGN	BA1 | BP6	neutral
BRCA2	32972369T>G	9719T>G	V3240G	missense	rs1566260882	VUS	LIKELY BENIGN	BP1 | BP4 | PM2
BRCA2	32972378C>T	9728C>T	P3243L	missense	rs80359241	VUS	LIKELY BENIGN	BS1 |BP1 | BP4
BRCA2	32972380G>A	9730G>A	V3244I	missense	rs11571831	benign	BENIGN	BA1 | BP1 | BP4 | BP6	neutral
BRCA2	32972420A>G	9770A>G	K3257R	missense	rs55847618	VUS	LIKELY BENIGN	BS1 |BP1 | BP4
BRCA2	32972520TT>T	9871del	S3291fs	frameshift variant	rs886040854	pathogenic	PATHOGENIC	PVS1 | PS1 | PM2 | PP5	HRD deficient
BRCA2	32972525C>T	9875C>T	P3292L	missense	rs56121817	VUS	BENIGN	BS1 | BS3 | BP1 | BP4	neutral
BRCA2	32972574C>T	9924C>T	Y3308=	synonymous codon	rs4987049	benign	LIKELY BENIGN	BS1 | BP6
BRCA2	32972626A>T	9976A>T	K3326*	stop gained	rs11571833	benign	BENIGN	BA1 | BS3 | BP6	neutral
BRCA2	32972760G>A	10110G>A	R3370=	synonymous codon	rs28897762	likely benign	BENIGN	BS1 | BS3 | BP6	neutral
BRCA2	32972761A>G	10111A>G	T3371A	missense	rs80358393	likely benign	LIKELY BENIGN	BS1 |BP1 | BP4
BRCA2	32972852C>T	10202C>T	T3401M	missense	rs55853199	VUS	LIKELY BENIGN	BP1 | BP4
BRCA2	32972853G>A	10203G>A	T3401=	synonymous codon	rs147854265	likely benign	LIKELY BENIGN	BS1
BRCA2	32972884A>G	10234A>G	I3412V	missense	rs1801426	benign	BENIGN	BA1 | BS3 | BP1 | BP4 | BP6	neutral
BRCA2	32972921C>T	*14C>T		utr variant 3 prime	rs373436334	likely benign	LIKELY BENIGN	BS1
BRCA2	32973012A>C	*105A>C		utr variant 3 prime	rs15869	benign	BENIGN	BA1 | BP6	neutral
BRCA1	41197659G>C	*36C>G		utr variant 3 prime	rs3092995	benign	BENIGN	BA1 | BP6	neutral
BRCA1	41197829G>T	5468-10C>A		splice site extended	rs8176316	benign	BENIGN	BA1 | BS3 |BP4 | BP6	neutral
BRCA1	41199671T>C	5456A>G	N1819S	missense	rs80357286	likely benign	BENIGN	BS1 | BS3 | BP4 | PM1	neutral
BRCA1	41201105T>A	5406+33A>T		intron variant	rs80358092	benign	BENIGN	BS1 | BS3 | BP6	neutral
BRCA1	41201162C>G	5382G>C	E1794D	missense	rs397509275	likely benign	LIKELY BENIGN	BS3 | BP4 | PM1	neutral
BRCA1	41209068C>T	5277+1G>A		splice donor variant	rs80358150	pathogenic	PATHOGENIC	PVS1 | PS3 | PM2 | PP3 | PP5	HRD deficient
BRCA1	41209139A>G	5207T>C	V1736A	missense	rs45553935	likely pathogenic	PATHOGENIC	PS3 | PM1 | PM2 | PP3 | PP5	HRD deficient
BRCA1	41215366CTTTC>C	5177_5180del	R1726fs	frameshift variant	rs80357867	pathogenic	PATHOGENIC	PVS1 | PS1 | PM2 | PP5	HRD deficient
BRCA1	41215905A>G	5138T>C	V1713A	missense	rs80357132	VUS	LIKELY PATHOGENIC	PS3 | PM2 | PP3	HRD deficient
BRCA1	41219674A>G	5025T>C	T1675=	synonymous codon	rs876658226	likely benign	VUS	PM2
BRCA1	41219711A>T	4988T>A	M1663K	missense	rs80357205	VUS	LIKELY PATHOGENIC	PS3 | PM2 | BP4	HRD deficient
BRCA1	41219713C>T	4987-1G>A		splice acceptor variant	rs730881495	pathogenic	PATHOGENIC	PVS1 | PS3 | PM2 | PP3 | PP5	HRD deficient
BRCA1	41222975C>T	4956G>A	M1652I	missense	rs1799967	benign	BENIGN	BA1 | BS3 |BP4 | BP6	neutral
BRCA1	41223094T>C	4837A>G	S1613G	missense	rs1799966	benign	BENIGN	BA1 | BS3 |BP4 | BP6	neutral
BRCA1	41223119T>C	4812A>G	Q1604=	synonymous codon	rs28897693	benign	BENIGN	BS1 | BS3 | BP6	neutral
BRCA1	41223214CAGAGA>C	4712_4716del	F1571*	stop gained	rs80357718	pathogenic	PATHOGENIC	PVS1 | PS1 | PM2 | PP5	HRD deficient
BRCA1	41223249G>A	4682C>T	T1561I	missense	rs56158747	benign	BENIGN	BS1 | BS3 | PP3	neutral
BRCA1	41226387C>T	4636G>A	D1546N	missense	rs28897691	benign	BENIGN	BS1 | BS3 | BP4 | BP6	neutral
BRCA1	41226388G>A	4635C>T	H1545=	synonymous codon	rs373686790	likely benign	LIKELY BENIGN	BS1
BRCA1	41226423C>T	4600G>A	V1534M	missense	rs55815649	benign	BENIGN	BS1 | BS3 | BP4 | BP6	neutral
BRCA1	41226488C>A	4535G>T	S1512I	missense	rs1800744	benign	BENIGN	BS1 | BS3 | BP6	neutral
BRCA1	41228491T>C	4484+14A>G		intron variant	rs80358022	benign	BENIGN	BS1 | BS3 | BP6	neutral
BRCA1	41234404T>C	4357+17A>G		intron variant	rs80358180	benign	LIKELY BENIGN	BS1
BRCA1	41234451G>A	4327C>T	R1443*	stop gained	rs41293455	pathogenic	PATHOGENIC	PVS1 | PS1 | PP5	HRD deficient
BRCA1	41234451G>C	4327C>G	R1443G	missense	rs41293455	likely benign	LIKELY BENIGN	BS1 | BP4 | PS3	likely HRD proficient
BRCA1	41234470A>G	4308T>C	S1436=	synonymous codon	rs1060915	benign	BENIGN	BA1 | BP6	neutral
BRCA1	41234534TC>T	4243del	E1415fs	frameshift variant	rs80357981	pathogenic	PATHOGENIC	PVS1 | PS1 | PM2 | PP5	HRD deficient
BRCA1	41242931C>T	4185+30G>A		intron variant	rs80358139	likely benign	LIKELY BENIGN	BS1
BRCA1	41242937T>C	4185+24A>G		intron variant	rs763074389	likely benign	LIKELY BENIGN	BS1
BRCA1	41243033C>T	4113G>A	G1371=	synonymous codon	rs147448807	likely benign	LIKELY BENIGN	BS1
BRCA1	41243422G>A	4096+30C>T		intron variant	rs369055904	likely benign	LIKELY BENIGN	BS1
BRCA1	41243509T>C	4039A>G	R1347G	missense	rs28897689	benign	BENIGN	BS1 | BS3 | BP4 | BP6	neutral
BRCA1	41243583T>G	3965A>C	K1322T	missense	rs80357042	VUS	VUS	PM2 | BP4
BRCA1	41243703T>A	3845A>T	E1282V	missense	rs80357217	VUS	LIKELY BENIGN	BS3 | BP4 | PM2	neutral
BRCA1	41243800C>A	3748G>T	E1250*	stop gained	rs28897686	pathogenic	PATHOGENIC	PVS1 | PS1 | PP5	HRD deficient
BRCA1	41243849T>C	3699A>G	K1233=	synonymous codon	rs368690455	benign	LIKELY BENIGN	BS1
BRCA1	41243882C>G	3666G>C	E1222D	missense	rs1555587312	VUS	VUS	PM2 | BP4
BRCA1	41243948C>G	3600G>C	Q1200H	missense	rs56214134	benign	BENIGN	BS1 | BS3	neutral
BRCA1	41243951A>T	3597T>A	A1199=	synonymous codon	rs1555587434	likely benign	VUS	PM2
BRCA1	41244000T>C	3548A>G	K1183R	missense	rs16942	benign	BENIGN	BA1 | BS3 |BP4 | BP6	neutral
BRCA1	41244130T>C	3418A>G	S1140G	missense	rs2227945	benign	BENIGN	BA1 | BS3 |BP4 | BP6	neutral
BRCA1	41244429C>T	3119G>A	S1040N	missense	rs4986852	benign	BENIGN	BA1 | BS3 |BP4 | BP6	neutral
BRCA1	41244435T>C	3113A>G	E1038G	missense	rs16941	benign	BENIGN	BA1 | BS3 |BP4 | BP6	neutral
BRCA1	41244607GT>G	2940del	P981fs	frameshift variant	rs80357876	pathogenic	PATHOGENIC	PVS1 | PS1 | PM2 | PP5	HRD deficient
BRCA1	41244835G>A	2713C>T	Q905*	stop gained	rs397509002	pathogenic	PATHOGENIC	PVS1 | PS1 | PM2 | PP5	HRD deficient
BRCA1	41244879C>A	2669G>T	G890V	missense	rs80356874	likely benign	BENIGN	BS1 | BS3 | BP4 | BP6	neutral
BRCA1	41244936G>A	2612C>T	P871L	missense	rs799917	benign	BENIGN	BA1 | BS3 |BP4 | BP6	neutral
BRCA1	41244952G>A	2596C>T	R866C	missense	rs41286300	benign	BENIGN	BS1 | BS3 | BP6 | PP3	neutral
BRCA1	41244953CT>C	2594del	K865fs	frameshift variant	rs80357756	pathogenic	PATHOGENIC	PVS1 | PS1 | PM2 | PP5	HRD deficient
BRCA1	41244982A>G	2566T>C	Y856H	missense	rs80356892	benign	BENIGN	BA1 | BS3 | BP6 | PP3	neutral
BRCA1	41244997C>T	2551G>A	E851K	missense	rs398122662	VUS	VUS	PM2 | PP3
BRCA1	41245090T>C	2458A>G	K820E	missense	rs56082113	benign	BENIGN	BA1 | BS3 |BP4 | BP6	neutral
BRCA1	41245145A>C	2403T>G	C801W	missense	rs80357381	VUS	VUS	PM2
BRCA1	41245233A>G	2315T>C	V772A	missense	rs80357467	benign	BENIGN	BS1 | BS3 | BP6	neutral
BRCA1	41245237A>G	2311T>C	L771=	synonymous codon	rs16940	benign	BENIGN	BA1 | BS3 | BP6	neutral
BRCA1	41245316A>C	2232T>G	A744=	synonymous codon	rs4986846	benign	VUS	-
BRCA1	41245326G>C	2222C>G	S741C	missense	rs80357051	VUS	VUS	PM2
BRCA1	41245341T>G	2207A>C	E736A	missense	rs397507196	likely benign	LIKELY BENIGN	BS3 | BP4	neutral
BRCA1	41245439T>C	2109A>G	T703=	synonymous codon	rs4986844	benign	LIKELY BENIGN	BS1 | BP6
BRCA1	41245466G>A	2082C>T	S694=	synonymous codon	rs1799949	benign	BENIGN	BA1 | BS3 | BP6	neutral
BRCA1	41245471C>T	2077G>A	D693N	missense	rs4986850	benign	BENIGN	BA1 | BS3 |BP4 | BP6	neutral
BRCA1	41245513T>A	2035A>T	K679*	stop gained	rs80357082	pathogenic	PATHOGENIC	PVS1 | PS1 | PM2 | PP5	HRD deficient
BRCA1	41245577T>C	1971A>G	Q657=	synonymous codon	rs28897679	benign	BENIGN	BA1 | BP6	neutral
BRCA1	41245702AAGA>A	1846_1848del	S616del	cds indel	rs80358329	likely benign	VUS	PM4 | PP5
BRCA1	41245844A>C	1704T>G	P568=	synonymous codon	rs587780795	likely benign	LIKELY BENIGN	BS1
BRCA1	41245936G>A	1612C>T	Q538*	stop gained	rs80356893	pathogenic	PATHOGENIC	PVS1 | PS1 | PM2 | PP5	HRD deficient
BRCA1	41246061C>T	1487G>A	R496H	missense	rs28897677	benign	BENIGN	BS1 | BS3 | BP4 | BP6	neutral
BRCA1	41246437GA>G	1110del	P371fs	frameshift variant	rs1555592474	pathogenic	PATHOGENIC	PVS1 | PS1 | PM2 | PP5	HRD deficient
BRCA1	41246455TAGGATTCTCTG>T	1082_1092del	S361*	stop gained	rs80359880	pathogenic	PATHOGENIC	PVS1 | PS1 | PM2 | PP5	HRD deficient
BRCA1	41246481T>C	1067A>G	Q356R	missense	rs1799950	benign	BENIGN	BA1 | BS3 |BP4 | BP6	neutral
BRCA1	41246561A>G	987T>C	N329=	synonymous codon	rs774849810	likely benign	LIKELY BENIGN	BS1
BRCA1	41246748GAA>G	798_799del	S267fs	frameshift variant	rs80357724	pathogenic	PATHOGENIC	PVS1 | PS1 | PM2 | PP5	HRD deficient
BRCA1	41246783C>T	765G>A	E255=	synonymous codon	rs62625299	likely benign	LIKELY BENIGN	BS1
BRCA1	41246809T>C	739A>G	N247D	missense	rs767720128	likely benign	VUS	PM2 | BP4
BRCA1	41246812A>C	736T>G	L246V	missense	rs28897675	benign	BENIGN	BS1 | BS3 | BP6 | PP3	neutral
BRCA1	41247837G>C	670+26C>G		intron variant	rs368134697	likely benign	LIKELY BENIGN	BS1
BRCA1	41249258C>T	593+3G>A		splice site extended	rs80358013	likely benign	LIKELY BENIGN	BS1 | BP4
BRCA1	41249263G>A	591C>T	C197=	splice site extended	rs1799965	benign	BENIGN	BS1 | BS3 | BP4 | BP6	neutral
BRCA1	41249283C>T	571G>A	V191I	missense	rs80357090	benign	BENIGN	BS1 | BS3 | BP6 | PP3	neutral
BRCA1	41249284G>A	570C>T	T190=	synonymous codon	rs201536070	likely benign	LIKELY BENIGN	BS1
BRCA1	41249297G>T	557C>A	S186Y	missense	rs55688530	benign	BENIGN	BS1 | BS3 | BP6 | PP3	neutral
BRCA1	41249323C>A	548-17G>T		intron variant	rs80358014	benign	BENIGN	BS1 | BS3 | BP6	neutral
BRCA1	41249324A>C	548-18T>G		intron variant	rs397507251	likely benign	VUS	-
BRCA1	41251931G>A	442-34C>T		intron variant	rs799923	benign	BENIGN	BA1 | BP6	neutral
BRCA1	41256088AAAAAAAAAAGAAAAG>A	441+36_441+50del		intron variant	rs1168113546	benign	VUS	PM2 | BP6
BRCA1	41256089AAAAAAAAAGAAAAG>A	441+36_441+49del		intron variant	rs373413425	benign	BENIGN	BA1 | BP6	neutral
BRCA1	41256153C>A	427G>T	E143*	stop gained	rs80356991	pathogenic	PATHOGENIC	PVS1 | PS1 | PM2 | PP5	HRD deficient
BRCA1	41256153C>T	427G>A	E143K	missense	rs80356991	VUS	BENIGN	BS1 | BS3 | BP6 | PP3	neutral
BRCA1	41256155G>T	425C>A	P142H	missense	rs55971303	likely benign	BENIGN	BS1 | BS3 | BP6	neutral
BRCA1	41256943T>C	243A>G	Q81=	synonymous codon	rs863224418	likely benign	VUS	BS3 | PM2	neutral
BRCA1	41256984A>C	213-11T>G		splice site extended	rs80358061	pathogenic	LIKELY PATHOGENIC	PS3 | PP3 | PP5 |	HRD deficient
BRCA1	41256985T>C	213-12A>G		splice site extended	rs80358163	pathogenic	LIKELY PATHOGENIC	PS3 | PM2 | PP3 | PP5	HRD deficient
BRCA1	41258450A>T	212+23T>A		intron variant	rs8176128	benign	BENIGN	BA1 | BS3 | BP6	neutral
BRCA1	41258452C>T	212+21G>A		intron variant	rs80358147	likely benign	LIKELY BENIGN	BS1
BRCA1	41258470T>C	212+3A>G		splice site extended	rs80358083	pathogenic	LIKELY PATHOGENIC	PS3 | PP3 | PP5 |	HRD deficient
BRCA1	41258474T>C	211A>G	R71G	missense	rs80357382	pathogenic	LIKELY PATHOGENIC	PS3 | PM2 | PP3 | PP5	HRD deficient
BRCA1	41258486C>A	199G>T	D67Y	missense	rs80357102	likely benign	BENIGN	BS1 | BS3 | BP6	neutral
BRCA1	41258504A>C	181T>G	C61G	missense	rs28897672	pathogenic	PATHOGENIC	PS1 | PS3 | PM1 | PP3 | PP5	HRD deficient
BRCA1	41267763C>T	114G>A	K38=	synonymous codon	rs1800062	benign	BENIGN	BA1 | BS3 | BP6 | PM1	neutral
BRCA1	41267809G>T	81-13C>A		intron variant	rs56328013	likely benign	BENIGN	BS1 | BS3	neutral
BRCA1	41267810G>A	81-14C>T		intron variant	rs80358006	benign	BENIGN	BS1 | BS3	neutral
BRCA1	41276039G>A	75C>T	P25=	synonymous codon	rs80356839	benign	VUS	BS1 | PM1
BRCA1	41276046TCT>T	68_69del	E23fs	frameshift variant	rs80357914	pathogenic	PATHOGENIC	PVS1 | PS1 | PM2 | PP5	HRD deficient
BRCA1	41276093G>A	21C>T	R7=	synonymous codon	rs149402012	benign	BENIGN	BS1 | BS3 | BP6	neutral
BRCA1	41276142A>G	-19-10T>C		splice site extended	rs201866997	benign	BENIGN	BS1 | BS3 | BP4	neutral

## Sheet: GCC
Gene	g.HGVS	c.HGVS	p.HGVS	Type	SNP-ID number	GCC classification	MH BRCA ACMG	MH BRCA ACMG criteria	MH Guide predicted PARPi response
BRCA2	32893346GGAAACCATCTTATAATCAG>G	201_219del	R67fs	frameshift variant	rs1566215870	pathogenic	PATHOGENIC	PVS1 | PM2 | PP5	HRD deficiency
BRCA2	32905096AGA>ACT	723_724delinsCT	K241_K242delinsN*	stop gained	rs1566221377	pathogenic	PATHOGENIC	PVS1 | PM2 | PP5	HRD deficiency
BRCA2	32906916AAAGA>A	1310_1313del	K437fs	frameshift variant	rs80359277	pathogenic	PATHOGENIC	PVS1 | PS1 | PM2 | PP5	HRD deficiency
BRCA2	32907113GG>G	1499del	G500fs	frameshift variant	rs397507591	pathogenic	PATHOGENIC	PVS1 | PS1 | PM2 | PP5	HRD deficiency
BRCA2	32907419GG>G	1805del	G602fs	frameshift variant	rs397507608	pathogenic	PATHOGENIC	PVS1 | PS1 | PM2 | PP5	HRD deficiency
BRCA2	32910891G>GG	2399dup	N801*	stop gained	rs886040423	pathogenic	PATHOGENIC	PVS1 | PS1 | PM2 | PP5	HRD deficiency
BRCA2	32911322A>T	2830A>T	K944*	stop gained	rs80358533	pathogenic	PATHOGENIC	PVS1 | PS1 | PP5	HRD deficiency
BRCA2	32911693TGTATCTGCACATTTACAGAGTAGTGTAGTTGTTTCTGATTGTAA>T	3202_3245del	V1068fs	frameshift variant	rs1566228017	pathogenic	PATHOGENIC	PVS1 | PS1 | PM2 | PP5	HRD deficiency
BRCA2	32911756T>TT	3264dup	Q1089fs	frameshift variant	rs80359380	pathogenic	PATHOGENIC	PVS1 | PS1 | PP5	HRD deficiency
BRCA2	32912338TGT>T	3847_3848del	V1283fs	frameshift variant	rs80359405	pathogenic	PATHOGENIC	PVS1 | PS1 | PP5	HRD deficiency
BRCA2	32912940CA>C	4449del	D1484fs	frameshift variant	rs80359448	pathogenic	PATHOGENIC	PVS1 | PS1 | PM2 | PP5	HRD deficiency
BRCA2	32913386AGTATCTTTTTGAAAGTTAAAGTACATGAAAATGTAGAAAAAGAA>A	4895_4938del	S1632fs	frameshift variant	rs1566231316	pathogenic	PATHOGENIC	PVS1 | PS1 | PM2 | PP5	HRD deficiency
BRCA2	32913457C>G	4965C>G	Y1655*	stop gained	rs80358721	pathogenic	PATHOGENIC	PVS1 | PS1 | PP5	HRD deficiency
BRCA2	32913829TG>T	5338del	E1780fs	frameshift variant	rs1566232230	pathogenic	PATHOGENIC	PVS1 | PS1 | PM2 | PP5	HRD deficiency
BRCA2	32913843A>AA	5351dup	N1784fs	frameshift variant	rs80359507	pathogenic	PATHOGENIC	PVS1 | PS1 | PM2 | PP5	HRD deficiency
BRCA2	32913988T>TT	5496dup	N1833*	stop gained	rs786203853	pathogenic	PATHOGENIC	PVS1 | PS1 | PM2 | PP5	HRD deficiency
BRCA2	32914137C>A	5645C>A	S1882*	stop gained	rs80358785	pathogenic	PATHOGENIC	PVS1 | PS1 | PP5	HRD deficiency
BRCA2	32914174C>G	5682C>G	Y1894*	stop gained	rs41293497	pathogenic	PATHOGENIC	PVS1 | PS1 | PM2 | PP5	HRD deficiency
BRCA2	32914437GT>G	5946del	S1982fs	frameshift variant	rs80359550	pathogenic	PATHOGENIC	PVS1 | PS1 | PP5 | BS1	HRD deficiency
BRCA2	32914707CC>C	4210del	L1404*	stop gained	rs80359567	pathogenic	PATHOGENIC	PVS1 | PS1 | PM2 | PP5	HRD deficiency
BRCA2	32914758AGCA>AC	6267_6269delinsC	E2089fs	frameshift variant	rs276174868	pathogenic	PATHOGENIC	PVS1 | PS1 | PM2 | PP5	HRD deficiency
BRCA2	32914877G>T	6385G>T	E2129*	stop gained	rs886040653	pathogenic	PATHOGENIC	PVS1 | PS1 | PM2 | PP5	HRD deficiency
BRCA2	32914953ATC>A	6468_6469del	Q2157fs	frameshift variant	rs80359596	pathogenic	PATHOGENIC	PVS1 | PS1 | PM2 | PP5	HRD deficiency
BRCA2	32920978C>T	6952C>T	R2318*	stop gained	rs80358920	pathogenic	PATHOGENIC	PVS1 | PS1 | PM2 | PP5	HRD deficiency
BRCA2	32936731G>A	7877G>A	W2626*	stop gained	rs587781506	pathogenic	PATHOGENIC	PVS1 | PS1 | PM1 | PM2 | PP5	HRD deficiency
BRCA2	32936818AA>A	7965del	Q2655fs	frameshift variant	rs1566244975	pathogenic	PATHOGENIC	PVS1 | PS1 | PM1 | PM2 | PP5	HRD deficiency
BRCA2	32936830G>A	7976G>A	R2659K	missense	rs80359027	pathogenic	PATHOGENIC	PS3 | PM1 | PM2 | PM5 | PP3 | PP5 | BP1	HRD deficiency
BRCA2	32954030A>AA	9097dup	T3033fs	frameshift variant	rs397507419	pathogenic	PATHOGENIC	PVS1 | PS1 | PP5	HRD deficiency
BRCA2	32954279A>AA	9253dup	T3085fs	frameshift variant	rs80359752	pathogenic	PATHOGENIC	PVS1 | PS1 | PP5	HRD deficiency
BRCA2	32971183T>C	9648+2T>C		splice donor variant	rs1566260318	likely pathogenic	PATHOGENIC	PVS1 | PM2 | PP3	HRD deficiency
BRCA2	32972315GT>G	9666del	C3222fs	frameshift variant	rs80359772	pathogenic	PATHOGENIC	PVS1 | PS1 | PM2 | PP5	HRD deficiency
BRCA1	41197784G>A	5503C>T	R1835*	stop gained	rs41293465	pathogenic	PATHOGENIC	PVS1 | PS1 | PM1 | PP5	HRD deficiency
BRCA1	41199683C>T	5444G>A	W1815*	stop gained	rs80356962	pathogenic	PATHOGENIC	PVS1 | PS1 | PM1 | PM2 | PP5	HRD deficiency
BRCA1	41201212C>A	5333-1G>T		splice acceptor variant	rs80358126	likely pathogenic	PATHOGENIC	PVS1 | PS3 | PM2 | PP3 | PP5	HRD deficiency
BRCA1	41209079T>TG	5266dup	Q1756fs	frameshift variant	rs80357906	pathogenic	PATHOGENIC	PVS1 | PS1 | PS3 | PM1 | PP5 | BS1	HRD deficiency
BRCA1	41215348AC>A	5193+1del		splice donor variant	rs397509236	pathogenic	PATHOGENIC	PVS1 | PS3 | PM2 | PP5	HRD deficiency
BRCA1	41215366CTTTC>C	5177_5180del	R1726fs	frameshift variant	rs80357867	pathogenic	PATHOGENIC	PVS1 | PS1 | PP5	HRD deficiency
BRCA1	41215391CT>C	5153-2del		splice acceptor variant	rs273901746	pathogenic	PATHOGENIC	PVS1 | PS3 | PM2 | PP5	HRD deficiency
BRCA1	41215947C>T	5096G>A	R1699Q	missense	rs41293459	likely pathogenic	LIKELY PATHOGENIC	PS3 | PM5 | PP3	HRD deficiency
BRCA1	41215957CAA>C	5084_5085del	F1695fs	frameshift variant	rs80357760	pathogenic	PATHOGENIC	PVS1 | PS1 | PM2 | PP5	HRD deficiency
BRCA1	41219625C>G	5074G>C	D1692H	missense	rs80187739	likely pathogenic	LIKELY PATHOGENIC	PS3 | PP3 | PP5	HRD deficiency
BRCA1	41222948TTCTTCTGGGGTCAGGCCAG>T	4964_4982del	S1655fs	frameshift variant	rs80359876	pathogenic	PATHOGENIC	PVS1 | PS1 | PM2 | PP5	HRD deficiency
BRCA1	41222985CT>C	4945del	R1649fs	frameshift variant	rs80357655	pathogenic	PATHOGENIC	PVS1 | PS1 | PM2 | PP5	HRD deficiency
BRCA1	41222994AC>A	4936del	V1646fs	frameshift variant	rs80357653	pathogenic	PATHOGENIC	PVS1 | PS1 | PM2 | PP5	HRD deficiency
BRCA1	41222998T>TTT	4932_4933dup	R1645fs	frameshift variant	rs80357833	pathogenic	PATHOGENIC	PVS1 | PS1 | PM2 | PP5	HRD deficiency
BRCA1	41223242G>C	4689C>G	Y1563*	stop gained	rs80357433	pathogenic	PATHOGENIC	PVS1 | PS1 | PP5	HRD deficiency
BRCA1	41226490GTG>G	4533_4534del	H1511fs	frameshift variant	rs80357534	pathogenic	PATHOGENIC	PVS1 | PS1 | PM2 | PP5	HRD deficiency
BRCA1	41226536G>T	4487C>A	S1496*	stop gained	rs80356953	pathogenic	PATHOGENIC	PVS1 | PS1 | PM2 | PP5	HRD deficiency
BRCA1	41234556G>A	4222C>T	Q1408*	stop gained	rs80356989	pathogenic	PATHOGENIC	PVS1 | PS1 | PM2 | PP5	HRD deficiency
BRCA1	41234567AG>A	6216del	L2073fs	frameshift variant	rs80357765	pathogenic	PATHOGENIC	PVS1 | PS1 | PM2 | PP5	HRD deficiency
BRCA1	41243455A>C	4093T>G	L1365V	missense	rs1567788936	likely pathogenic	VUS	PM2 | PP3
BRCA1	41243778TCT>T	3770_3771del	E1257fs	frameshift variant	rs80357579	pathogenic	PATHOGENIC	PVS1 | PS1 | PP5	HRD deficiency
BRCA1	41243778TCTGTGTTCTTAGACAGACA>T	3751_3769del	C1251fs	frameshift variant	rs1567790190	pathogenic	PATHOGENIC	PVS1 | PM2 | PP5	HRD deficiency
BRCA1	41243792CAGAC>C	3756_3759del	S1253fs	frameshift variant	rs80357868	pathogenic	PATHOGENIC	PVS1 | PS1 | PP5	HRD deficiency
BRCA1	41243848CTTTAC>C	3700_3704del	V1234fs	frameshift variant	rs80357609	pathogenic	PATHOGENIC	PVS1 | PS1 | PM2 | PP5	HRD deficiency
BRCA1	41243941G>A	3607C>T	R1203*	stop gained	rs62625308	pathogenic	PATHOGENIC	PVS1 | PS1 | PP5	HRD deficiency
BRCA1	41244056ACTAGTATCTTC>A	3481_3491del	E1161fs	frameshift variant	rs80357877	pathogenic	PATHOGENIC	PVS1 | PS1 | PM2 | PP5	HRD deficiency
BRCA1	41244196G>A	3352C>T	Q1118*	stop gained	rs397507215	pathogenic	PATHOGENIC	PVS1 | PS1 | PM2 | PP5	HRD deficiency
BRCA1	41244280G>A	3268C>T	Q1090*	stop gained	rs80357402	pathogenic	PATHOGENIC	PVS1 | PS1 | PM2 | PP5	HRD deficiency
BRCA1	41244439T>TA	3108dup	K1037*	stop gained	rs80357841	pathogenic	PATHOGENIC	PVS1 | PS1 | PM2 | PP5	HRD deficiency
BRCA1	41244451CT>C	3096del	E1033fs	frameshift variant	rs1567792938	pathogenic	LIKELY PATHOGENIC	PVS1 | PM2	HRD deficiency
BRCA1	41244526TTGAA>T	3018_3021del	H1006fs	frameshift variant	rs80357749	pathogenic	PATHOGENIC	PVS1 | PS1 | PM2 | PP5	HRD deficiency
BRCA1	41244877AC>A	2670del	S891fs	frameshift variant	rs80357659	pathogenic	PATHOGENIC	PVS1 | PS1 | PM2 | PP5	HRD deficiency
BRCA1	41245032TG>T	2515del	H839fs	frameshift variant	rs80357607	pathogenic	PATHOGENIC	PVS1 | PS1 | PM2 | PP5	HRD deficiency
BRCA1	41245072TG>T	2475del	D825fs	frameshift variant	rs80357970	pathogenic	PATHOGENIC	PVS1 | PS1 | PM2 | PP5	HRD deficiency
BRCA1	41245210G>A	2338C>T	Q780*	stop gained	rs80356945	pathogenic	PATHOGENIC	PVS1 | PS1 | PM2 | PP5	HRD deficiency
BRCA1	41245338GT>G	2209del	T737fs	frameshift variant	rs1060502333	pathogenic	PATHOGENIC	PVS1 | PS1 | PM2 | PP5	HRD deficiency
BRCA1	41245591TTTTC>T	1953_1956del	K653fs	frameshift variant	rs80357526	pathogenic	PATHOGENIC	PVS1 | PS1 | PM2 | PP5	HRD deficiency
BRCA1	41245608CTGCTAGAACAACTATCAATT>C	1920_1939del	I641*	stop gained	rs1567797661	pathogenic	PATHOGENIC	PVS1 | PM2 | PP5	HRD deficiency
BRCA1	41245645T>TA	1902dup	N635*	stop gained	rs1567797787	pathogenic	LIKELY PATHOGENIC	PVS1 | PM2	HRD deficiency
BRCA1	41245673T>TACTA	1874_1875insTAGT	V626fs	frameshift variant	rs80357516	pathogenic	LIKELY PATHOGENIC	PVS1 | PM2	HRD deficiency
BRCA1	41245692TG>T	1855del	H619fs	frameshift variant	rs1567798003	pathogenic	LIKELY PATHOGENIC	PVS1 | PM2	HRD deficiency
BRCA1	41245861G>A	1687C>T	Q563*	stop gained	rs80356898	pathogenic	PATHOGENIC	PVS1 | PS1 | PP5	HRD deficiency
BRCA1	41245927G>A	1621C>T	Q541*	stop gained	rs80356904	pathogenic	PATHOGENIC	PVS1 | PS1 | PM2 | PP5	HRD deficiency
BRCA1	41246276A>ACTGGCCAGTAAGTCTATTTTCTCTGAAGAAC	1271_1272insGTTCTTCAGAGAAAATAGACTTACTGGCCAG	S425fs	frameshift variant	rs1567800087	pathogenic	PATHOGENIC	PVS1 | PS1 | PM2	HRD deficiency
BRCA1	41246334G>T	1214C>A	S405*	stop gained	rs80357481	pathogenic	PATHOGENIC	PVS1 | PS1 | PM2 | PP5	HRD deficiency
BRCA1	41246355G>C	1193C>G	S398*	stop gained	rs80357068	pathogenic	PATHOGENIC	PVS1 | PS1 | PM2 | PP5	HRD deficiency
BRCA1	41246420AT>A	1127del	N376fs	frameshift variant	rs80357821	pathogenic	PATHOGENIC	PVS1 | PS1 | PM2 | PP5	HRD deficiency
BRCA1	41246432C>T	1116G>A	W372*	stop gained	rs80357468	pathogenic	PATHOGENIC	PVS1 | PS1 | PM2 | PP5	HRD deficiency
BRCA1	41246531C>CT	1016dup	V340fs	frameshift variant	rs80357569	pathogenic	PATHOGENIC	PVS1 | PS1 | PM2 | PP5	HRD deficiency
BRCA1	41246640TC>T	907del	E303fs	frameshift variant	rs1567801576	pathogenic	PATHOGENIC	PVS1 | PS1 | PM2	HRD deficiency
BRCA1	41256182CG>C	397del	R133fs	frameshift variant	rs886037973	pathogenic	PATHOGENIC	PVS1 | PS1 | PM2 | PP5	HRD deficiency
BRCA1	41256234C>A	346G>T	E116*	stop gained	rs397509071	pathogenic	PATHOGENIC	PVS1 | PM2 | PP5	HRD deficiency
BRCA1	41256237GA>G	342del	P115fs	frameshift variant	rs886040129	pathogenic	PATHOGENIC	PVS1 | PS1 | PM2 | PP5	HRD deficiency
BRCA1	41256985T>C	213-12A>G		splice site extended	rs80358163	pathogenic	LIKELY PATHOGENIC	PS3 | PM2 | PP3 | PP5	HRD deficiency
BRCA1	41258473C>G	212G>C	R71T	missense	rs80356913	pathogenic	LIKELY PATHOGENIC	PS3 | PM2 | PP3	likely HRD proficient
BRCA1	41258504A>C	181T>G	C61G	missense	rs28897672	pathogenic	PATHOGENIC	PS1 | PS3 | PM1 | PP3 | PP5	HRD deficiency
BRCA1	41276046TCT>T	68_69del	E23fs	frameshift variant	rs80357914	pathogenic	PATHOGENIC	PVS1 | PS1 | PM1 | PP5	HRD deficiency
BRCA1	41276047C>CT	66dup	E23fs	frameshift variant	rs80357783	pathogenic	PATHOGENIC	PVS1 | PS1 | PM1 | PM2 | PP5	HRD deficiency
BRCA1	41276080G>A	34C>T	Q12*	stop gained	rs80357134	pathogenic	PATHOGENIC	PVS1 | PS1 | PM2 | PP5	HRD deficiency

## Sheet: YCH
Gene	g.HGVS	c.HGVS	p.HGVS	Type	SNP-ID number	YCH classification	MH BRCA DB onsensus	MH BRCA ACMG	MH BRCA Consolidated	ToMMo PF>1%	MH BRCA ACMG criteria	MH Guide predicted PARPi response
BRCA2	32890572G>A	-26G>A		utr variant 5 prime	rs1799943	benign	BENIGN	BENIGN	BENIGN	0.4665	BA1 | BP6	neutral
BRCA2	32890650G>A	53G>A	R18H	missense	rs80358762	benign	BENIGN	BENIGN	BENIGN		BS1 |BS3 | BP1 | BP4 | BP6	neutral
BRCA2	32899388A>C	425+67A>C		intron variant	rs11571610	benign	BENIGN	BENIGN	BENIGN	0.1261	BA1 | BP6	neutral
BRCA2	32900372C>A	476-7C>A		intron variant	-	VUS	-	VUS	VUS		PM2
BRCA2	32906480A>C	865A>C	N289H	missense	rs766173	benign	BENIGN	BENIGN	BENIGN	0.1263	BA1 | BS3 | BP1 | BP6	neutral
BRCA2	32906579A>C	964A>C	K322Q	missense	rs11571640	benign	VUS	BENIGN	BENIGN	0.0135	BA1 | BP1	neutral
BRCA2	32906729A>C	1114A>C	N372H	missense	rs144848	benign	BENIGN	BENIGN	BENIGN	0.2144	BA1 | BS3 | BP1 | BP6	neutral
BRCA2	32906980A>G	1365A>G	S455=	synonymous codon	rs1801439	benign	BENIGN	BENIGN	BENIGN	0.1263	BA1 | BP6	neutral
BRCA2	32907440C>T	1825C>T	Q609*	stop gained	rs80358472	pathogenic	PATHOGENIC	PATHOGENIC	PATHOGENIC		PVS1 | PS1 | PM2 | PP5	HRD deficient (high)
BRCA2	32910678T>C	2186T>C	I729T	missense	rs431825296	VUS	VUS	LIKELY BENIGN	LIKELY BENIGN		BS1 | BP1 | BP4
BRCA2	32910721T>C	2229T>C	H743=	synonymous codon	rs1801499	benign	BENIGN	BENIGN	BENIGN	0.1263	BA1 | BP6	neutral
BRCA2	32910842A>G	2350A>G	M784V	missense	rs11571653	benign	BENIGN	BENIGN	BENIGN	0.0991	BA1 | BS3 | BP1 | BP4 | BP6	neutral
BRCA2	32910859AG>A	2368delG	E790fs	frameshift variant	-	pathogenic	PATHOGENIC	PATHOGENIC	PATHOGENIC		PVS1 | PM2 | PP5	HRD deficient (high)
BRCA2	32911039A>ACC	2547_2548insCC	Q850fs	frameshift variant	-	pathogenic	PATHOGENIC	PATHOGENIC	PATHOGENIC		PVS1 | PM2 | PP5	HRD deficient (high)
BRCA2	32911080AT>A	2589delT	Q864fs	frameshift variant	rs397507632	pathogenic	PATHOGENIC	PATHOGENIC	PATHOGENIC		PVS1 | PS1 | PP5	HRD deficient (high)
BRCA2	32911463A>G	2971A>G	N991D	missense	rs1799944	benign	BENIGN	BENIGN	BENIGN	0.1263	BA1 | BS3 | BP1 | BP4 | BP6	neutral
BRCA2	32911676C>T	3184C>T	P1062S	missense	rs1555283083	VUS	VUS	LIKELY BENIGN	LIKELY BENIGN		BP1 | BP4 | PM2
BRCA2	32911888A>G	3396A>G	K1132=	synonymous codon	rs1801406	benign	BENIGN	BENIGN	BENIGN	0.4824	BA1 | BP6	neutral
BRCA2	32912299T>C	3807T>C	V1269=	synonymous codon	rs543304	benign	BENIGN	BENIGN	BENIGN	0.1419	BA1 | BP6	neutral
BRCA2	32912345GA>G	3854delA	N1287fs	frameshift variant	-	pathogenic	PATHOGENIC	PATHOGENIC	PATHOGENIC		PVS1 | PM2 | PP5	HRD deficient (high)
BRCA2	32912650TTTAAC>T	4159_4163delTTAAC	T1388fs	frameshift variant	-	pathogenic	PATHOGENIC	PATHOGENIC	PATHOGENIC		PVS1 | PM2 | PP5	HRD deficient (high)
BRCA2	32913055A>G	4563A>G	L1521=	synonymous codon	rs206075	benign	BENIGN	BENIGN	BENIGN		BA1 | BP6	neutral
BRCA2	32913407G>A	4915G>A	V1639I	missense	rs80358716	VUS	VUS	VUS	VUS		BP1 | PM2
BRCA2	32913571TAGAG>T	5080_5083delAGAG	G2281fs	frameshift variant	-	pathogenic	-	LIKELY PATHOGENIC	LIKELY PATHOGENIC		PVS1 | PM2	HRD deficient (high)
BRCA2	32914137C>A	5645C>A	S1882*	stop gained	rs80358785	pathogenic	PATHOGENIC	PATHOGENIC	PATHOGENIC		PVS1 | PS1 | PP5	HRD deficient (high)
BRCA2	32914175G>A	5683G>A	E1895K	missense	rs146351301	VUS	VUS	LIKELY BENIGN	LIKELY BENIGN		BS1 | BP1 | BP4
BRCA2	32914200T>C	5708T>C	I1903T	missense	rs149474191	VUS	VUS	VUS	VUS		BP1
BRCA2	32914277A>G	5785A>G	I1929V	missense	rs79538375	benign	BENIGN	BENIGN	BENIGN		BS1 | BS3 | BP1 | BP4 | BP6	neutral
BRCA2	32914461A>C	5969A>C	D1990A	missense	rs148618542	VUS	VUS	LIKELY BENIGN	LIKELY BENIGN		BS1 | BP1
BRCA2	32914521T>G	6029T>G	V2010G	missense	-	VUS	VUS	LIKELY BENIGN	LIKELY BENIGN		BS1 | BP1 | BP4
BRCA2	32914623G>T	6131G>T	G2044V	missense	rs56191579	benign	LIKELY PATHOGENIC	BENIGN	BENIGN	0.0144	BA1 | BP1 | PP5	neutral
BRCA2	32914817G>A	6325G>A	V2109I	missense	rs79456940	VUS	VUS	LIKELY BENIGN	LIKELY BENIGN		BS1 | BP1 | BP4
BRCA2	32914893ATAACT>A	6402_6406delTAACT	N2135fs	frameshift variant	-	pathogenic	PATHOGENIC	PATHOGENIC	PATHOGENIC		PVS1 | PS1 | PP5 | BS1	HRD deficient (high)
BRCA2	32914935CTA>C	6445_6446delAT	I2149fs	frameshift variant	-	pathogenic	PATHOGENIC	PATHOGENIC	PATHOGENIC		PVS1 | PM2 | PP5	HRD deficient (high)
BRCA2	32915005G>C	6513G>C	V2171=	synonymous codon	rs206076	benign	BENIGN	BENIGN	BENIGN		BA1 | BP6	neutral
BRCA2	32915048T>TA	6556_6557insA	S2186fs	frameshift variant	-	pathogenic	-	LIKELY PATHOGENIC	LIKELY PATHOGENIC		PVS1 | PM2	HRD deficient (high)
BRCA2	32920978C>T	6952C>T	R2318*	stop gained	rs80358920	pathogenic	PATHOGENIC	PATHOGENIC	PATHOGENIC		PVS1 | PS1 | PM2 | PP5	HRD deficient (high)
BRCA2	32929232A>G	7242A>G	S2414=	synonymous codon	rs1799955	benign	BENIGN	BENIGN	BENIGN	0.48	BA1 | BP6	neutral
BRCA2	32929387T>C	7397T>C	V2466A	missense	rs169547	benign	BENIGN	BENIGN	BENIGN		BA1 | BP6	neutral
BRCA2	32929478C>T	7435+53C>T		intron variant	rs11147489	benign	BENIGN	BENIGN	BENIGN	0.1303	BA1 | BP6	neutral
BRCA2	32930636G>A	7507G>A	V2503I	missense	rs587782191	VUS	VUS	LIKELY BENIGN	LIKELY BENIGN		BP1 | BP4
BRCA2	32936646T>C	7806-14T>C		intron variant	rs9534262	benign	BENIGN	BENIGN	BENIGN	0.6433	BA1 | BP6	neutral
BRCA2	32937362A>G	8023A>G	I2675V	missense	rs397507954	likely pathogenic	LIKELY PATHOGENIC	LIKELY PATHOGENIC	LIKELY PATHOGENIC		PS3 | PM2 | PP3 | PP5 | BP1	likely HRD proficient (low)
BRCA2	32937526G>T	8187G>T	K2729N	missense	rs80359065	benign	BENIGN	BENIGN	BENIGN	0.0139	BA1 | BS3 | BP1 | BP6 | PP3	neutral
BRCA2	32937635A>G	8296A>G	T2766A	missense	-	VUS	-	LIKELY BENIGN	LIKELY BENIGN		BP1 | BP4
BRCA2	32953388T>C	8755-66T>C		intron variant	rs4942486	benign	BENIGN	BENIGN	BENIGN	0.6401	BA1 | BP6	neutral
BRCA2	32954022CAAAA>C	9094_9097delAAAA	K3032fs	frameshift variant	-	pathogenic	PATHOGENIC	PATHOGENIC	PATHOGENIC		PVS1 | PM2 | PP5	HRD deficient (high)
BRCA2	32954192C>T	9166C>T	H3056Y	missense	-	VUS	-	LIKELY BENIGN	LIKELY BENIGN		BP1 | BP4 | PM2
BRCA1	41209091G>C	5255C>G	A1752G	missense	rs80357028	VUS	VUS	VUS	VUS		BS3 | PM2	neutral
BRCA1	41215825C>T	5152+66G>A		intron variant	rs3092994	benign	BENIGN	BENIGN	BENIGN	0.3246	BA1 | BP6	neutral
BRCA1	41219780T>C	4987-68A>G		intron variant	rs8176234	benign	BENIGN	BENIGN	BENIGN	0.323	BA1 | BP6	neutral
BRCA1	41219804T>C	4987-92A>G		intron variant	rs8176233	benign	BENIGN	BENIGN	BENIGN	0.3222	BA1 | BP6	neutral
BRCA1	41222974C>A	4957G>T	V1653L	missense	rs80357261	VUS	-	LIKELY PATHOGENIC	LIKELY PATHOGENIC		PS3 | PM2	HRD deficient (high)
BRCA1	41223048A>G	4883T>C	M1628T	missense	rs4986854	benign	BENIGN	BENIGN	BENIGN	0.019	BA1 | BS3 | BP4 | BP6	neutral
BRCA1	41223094T>C	4837A>G	S1613G	missense	rs1799966	benign	BENIGN	BENIGN	BENIGN	0.3239	BA1 | BS3 | BP6	neutral
BRCA1	41223202A>G	4729T>C	S1577P	missense	rs80356909	VUS	VUS	BENIGN	BENIGN		BS1 | BS3 | BP4	neutral
BRCA1	41231516C>T	4358-2885G>A		intron variant	rs8176193	benign	BENIGN	BENIGN	BENIGN	0.3238	BA1 | BP6	neutral
BRCA1	41234451G>A	4327C>T	R1443*	stop gained	rs41293455	pathogenic	PATHOGENIC	PATHOGENIC	PATHOGENIC		PVS1 | PS1 | PP5	HRD deficient (high)
BRCA1	41234470A>G	4308T>C	S1436=	synonymous codon	rs1060915	benign	BENIGN	BENIGN	BENIGN	0.3239	BA1 | BP6	neutral
BRCA1	41243655G>T	3893C>A	S1298*	stop gained	rs80357440	pathogenic	PATHOGENIC	PATHOGENIC	PATHOGENIC		PVS1 | PS1 | PM2 | PP5	HRD deficient (high)
BRCA1	41243776CCT>C	3770_3771delAG	E1257fs	frameshift variant	-	pathogenic	PATHOGENIC	PATHOGENIC	PATHOGENIC		PVS1 | PS1 | PP5	HRD deficient (high)
BRCA1	41243841T>C	3707A>G	N1236S	missense	rs863224760	VUS	VUS	VUS	VUS		BP4 | PM2
BRCA1	41244000T>C	3548A>G	K1183R	missense	rs16942	benign	BENIGN	BENIGN	BENIGN	0.324	BA1 | BS3 | BP4 | BP6	neutral
BRCA1	41244100G>A	3448C>T	P1150S	missense	rs80357272	VUS	LIKELY PATHOGENIC	BENIGN	BENIGN		BS1 | BS3 | PP3 | PP5	neutral
BRCA1	41244175A>T	3373T>A	S1125T	missense	-	VUS	-	VUS	VUS		PM2
BRCA1	41244435T>C	3113A>G	E1038G	missense	rs16941	benign	BENIGN	BENIGN	BENIGN	0.3239	BA1 | BS3 | BP6	neutral
BRCA1	41244495T>C	3053A>G	N1018S	missense	rs1567793093	VUS	-	VUS	VUS		BP4 | PM2
BRCA1	41244748G>A	2800C>T	Q934*	stop gained	rs80357223	pathogenic	PATHOGENIC	PATHOGENIC	PATHOGENIC		PVS1 | PS1 | PM2 | PP5	HRD deficient (high)
BRCA1	41244936G>A	2612C>T	P871L	missense	rs799917	benign	BENIGN	BENIGN	BENIGN	0.3239	BA1 | BS3 | BP4 | BP6	neutral
BRCA1	41244982A>G	2566T>C	Y856H	missense	rs80356892	benign	BENIGN	BENIGN	BENIGN		BA1 | BS3 | BP6	neutral
BRCA1	41245237A>G	2311T>C	L771=	synonymous codon	rs16940	benign	BENIGN	BENIGN	BENIGN	0.3238	BA1 | BS3 | BP6	neutral
BRCA1	41245466G>A	2082C>T	S694=	synonymous codon	rs1799949	benign	BENIGN	BENIGN	BENIGN	0.3239	BA1 | BS3 | BP6	neutral
BRCA1	41245583G>C	1965C>G	Y655*	stop gained	-	pathogenic	-	PATHOGENIC	PATHOGENIC		PVS1 | PS1 | PM2	HRD deficient (high)
BRCA1	41245594T>TC	1953dupG	K652fs	frameshift variant	rs80357753	pathogenic	PATHOGENIC	PATHOGENIC	PATHOGENIC		PVS1 | PM2 | PP5	HRD deficient (high)
BRCA1	41246346C>T	1202G>A	G401E	missense	rs397507184	VUS	VUS	VUS	VUS		BP4 | PM2
BRCA1	41246696C>G	852G>C	Q284H	missense	-	VUS	-	VUS	VUS		PM2
BRCA1	41246724C>T	824G>A	G275D	missense	rs397509327	VUS	LIKELY PATHOGENIC	BENIGN	BENIGN		BS1 | BS3 | PP3 | PP5	neutral
BRCA1	41246737C>T	811G>A	V271M	missense	rs80357244	VUS	LIKELY PATHOGENIC	BENIGN	BENIGN		BS1 | BS3 | PP5	neutral
BRCA1	41246885T>C	671-8A>G		intron variant	-	VUS	VUS	LIKELY BENIGN	LIKELY BENIGN		BS1
BRCA1	41256084A>G	441+55T>C		intron variant	-	likely benign	-	VUS	VUS		PM2
BRCA1	41256852T>C	301+33A>G		intron variant	-	likely benign	-	VUS	VUS		-
BRCA1	41256904C>A	282G>T	Q94H	missense	-	VUS	-	LIKELY BENIGN	LIKELY BENIGN		BS3 | BP4 | PM2	neutral
BRCA1	41258497A>T	188T>A	L63*	stop gained	rs80357086	pathogenic	PATHOGENIC	PATHOGENIC	PATHOGENIC		PVS1 | PS1 | PP5	HRD deficient (high)
BRCA1	41258531G>A	154C>T	L52F	missense	rs80357084	VUS	VUS	BENIGN	BENIGN		BS1 | BS3 | PM1 |PP3	neutral
