# Supplementary material for: Consolidated BRCA1/2 Variant Interpretation by MH BRCA Correlates with Predicted PARP Inhibitor Efficacy Association by MH Guide
Source: Int J Mol Sci. 2020 May 29;21(11):3895. doi: 10.3390/ijms21113895 (PMC7312854; doi:10.3390/ijms21113895)
Supplement: Supplementary file 1 [file ijms-21-03895-s001.zip › Supplemental Table 3.pdf]

**Table S3: Comparison of population-frequencies in ToMMo, 1000G, ExAC, or GnomAD**

Selected examples of diversity in PF data between the investigated databases. Color code used for visualization: PF>5% (dark green), PF>1% (green), PF>0.1% (light green), and PF<0.1 % (white). Abbreviations: PF=population-frequency; JPN=Japan; EAS=East Asia

| GENE  | HGVS p. | SNP-ID number | ToMMo    | 1000G       | 1000G    | ExAC        | ExAC     | GnomAD      | GnomAD   |
|-------|---------|---------------|----------|-------------|----------|-------------|----------|-------------|----------|
|       |         |               | PF (JPN) | PF (Global) | PF (JPN) | PF (Global) | PF (EAS) | PF (Global) | PF (EAS) |
| BRCA2 | S455=   | rs1801439     | 12.63%   | 7.37%       | 8.65%    | 5.18%       | 10.03%   | 4.99%       | 10.12%   |
| BRCA2 | N289H   | rs766173      | 12.63%   | 7.37%       | 8.65%    | 5.18%       | 10.02%   | 4.96%       | 10.19%   |
| BRCA2 | N991D   | rs1799944     | 12.63%   | 8.00%       | 8.65%    | 5.34%       | 10.02%   | 5.22%       | 10.12%   |
| BRCA2 | H743=   | rs1801499     | 12.63%   | 7.35%       | 8.65%    | 5.16%       | 10.02%   | 5.03%       | 10.13%   |
| BRCA2 | M784V   | rs11571653    | 9.91%    | 0.36%       | 8.65%    | 0.03%       | 0.44%    | 0.02%       | 0.29%    |
| BRCA1 | K38=    | rs1800062     | 7.88%    | 1.26%       | 10.10%   | 0.41%       | 4.14%    | 0.42%       | 3.91%    |
| BRCA1 | M1628T  | rs4986854     | 1.90%    | 0.26%       | 5.29%    | 0.15%       | 0.64%    | 0.14%       | 0.42%    |
| BRCA2 | I3412V  | rs1801426     | 1.89%    | 4.49%       | 0.96%    | 2.27%       | 2.60%    | 2.48%       | 2.43%    |
| BRCA2 | G2044V  | rs56191579    | 1.44%    | 0.06%       | 1.44%    | 0.00%       | 0.06%    | 0.00%       | 0.05%    |
| BRCA2 | K2729N  | rs80359065    | 1.39%    | 0.26%       | 1.44%    | 0.08%       | 0.97%    | 0.08%       | 0.92%    |
| BRCA2 | K322Q   | rs11571640    | 1.35%    | 0.06%       | 1.44%    | 0.01%       | 0.08%    | 0.00%       | 0.05%    |
| BRCA1 | Y856H   | rs80356892    | -        | 0.30%       | 2.40%    | 0.15%       | 2.08%    | 0.16%       | 2.23%    |
