# Supplementary material for: Consolidated BRCA1/2 Variant Interpretation by MH BRCA Correlates with Predicted PARP Inhibitor Efficacy Association by MH Guide
Source: Int J Mol Sci. 2020 May 29;21(11):3895. doi: 10.3390/ijms21113895 (PMC7312854; doi:10.3390/ijms21113895)
Supplement: Supplementary file 1 [file ijms-21-03895-s001.zip › Supplemental Table 4.xlsx]

## Sheet: ClinVar submitter_Discordance
ClinVar submitter	GENE	GENOMIC	TRANSCRIPT	PROTEIN	TYPE	SNP-ID number	Submitter CLASSIFICATION	Submitter Comment	Interpretation Last evaluated	MH BRCA CLASSIFICATION	ACMG_CRITERIA	REF.	FUNCTIONAL IMPACT ON PROTEIN
GCC	BRCA1	41243455A>C	4093T>G	L1365V	SNV	rs1567788936	Likely Pathogenic		2018-12-01	VUS	PM2 | PP3
ENIGMA	BRCA1	41256955C>A	231G>T	T77=	silent SNV	rs80356847	Likely benign	Splicing prior probability (PRIORS).	2017-06-29	Likely pathogenic	PS3 | PM2	[1] [2]	impaired in HRD-dependent cell survival assay; exon 6 skipping (>60%) in minigene assay
ENIGMA	BRCA1	41256925C>T	261G>A	L87=	silent SNV	rs757971617	Likely benign	Splicing prior probability (PRIORS).	2017-06-29	Likely pathogenic	PS3 | PM2	[1]	impaired in HRD-dependent cell survival assay
ENIGMA	BRCA1	41246762C>T	786G>A	Q262=	silent SNV	rs397509317	Likely benign	Splicing prior probability (PRIORS).	2017-06-29	Likely pathogenic	PS3 | PM2	[3] [4]	increased amount of BRCA1 Δ11q isoform (>70%); cytoplasmic localization due to disrupted NLS motif
ENIGMA	BRCA2	32937331T>A	7992T>A	I2664=	silent SNV	rs80359800	Likely benign	Splicing prior probability (PRIORS).	2017-06-29	Likely pathogenic	PS3 | PM1	[5] [6]	partial exon 18 skipping (>30%) results in p.Y2660fs; partial exon 18 skipping (~50%)
ENIGMA	BRCA1	41243451C>T	4096+1G>A		Splice site	rs80358178	VUS	Clinical data collected by ENIGMA demostrates no high-risk variant. No clinically relevant domain in exon 11.	2018-04-12	Pathogenic	PVS1 | PS3 | PP3 | PP5	[7] [4]	increased amount of BRCA1 Δ11q isoform (~75%); cytoplasmic localization due to disrupted NLS motif
ENIGMA	BRCA2	32953453G>A	8755-1G>A		Splice site	rs81002812	VUS*	Insufficient evidence to determine clinical significance	2016-04-15	Pathogenic	PVS1 | PS3 | PM2 | PP3 | PP5	[8] [9] [10]	exon 22 skipping results in p.G2919fs; exon 22 skipping (17%) and exon 22 del1 (83%) multifactorial likelihood quantitative analysis
ENIGMA	BRCA2	32972575G>T	9925G>T	E3309*	nonsense SNV	rs80359251	VUS	Premature stop codon is located between the high-risk variant p.Tyr3308Ter and the known low-risk variant p.Lys3326Ter. Functional assay result similar to (Likely) Benign variants (Mesman 2019).	2019-06-05	Pathogenic	PVS1 | PM2 | PP5	[11] [12]	Inconclusive / conflicting data: reduced viability and hypersensitivity to various DNA damaging agents complementation of cell lethal phenotype, HDR activity (75%), cisplatin-sensitivity (145%)
ENIGMA	BRCA2	32972596G>T	9946G>T	E3316*	nonsense SNV	rs758051959	VUS	Premature stop codon is located between the high-risk variant p.Tyr3308Ter and the known low-risk variant p.Lys3326Ter.	2019-06-05	Pathogenic	PVS1 | PM2 | PP5
ENIGMA	BRCA1	41243449T>C	4096+3A>G		IVS	rs80358015	VUS	Identified in a healthy homozygous carrier (Byrjalsen et al., 2018). Clinical data collected by ENIGMA demonstrates no high-risk pathogenic variant. No clinically relevant domain in exon 11.	2018-04-12	Likely pathogenic	PS3 | PM2 | PP3 | PP5	[13] [4]	enhanced splicing of BRCA1 Δ11q and Δ11 isoforms; cytoplasmic localization due to disrupted NLS motif
ARUP	BRCA1	41219711A>T	4988T>A	M1663K	SNV	rs80357205	VUS	not provided	2017-11-10	Likely pathogenic	PS3 | PM2 | BP4	[1] [14]	impaired in HRD-dependent cell survival assay; exon 17 skipping (>97%) results in p.F1662fs
ARUP	BRCA1	41215905A>G	5138T>C	V1713A	SNV	rs80357132	VUS	Variant (rs80357132) is described in HBOC family (Struewing 1995). Functional analyses: altered substrate binding and specificity as well as altered transcriptional activity (Carvalho 2007, Lee 2010). Absent from the general population databases. The valine at codon 1713 is highly conserved. Computational analyses predict that the variant is deleterious. However, due to limited information, the c…	2018-05-21	Likely pathogenic	PS3 | PM2 | PP3	[1] [15]	impaired in HRD-dependent cell survival assay; loss of transcriptional activity and compromised protein binding affinity and specifity
ARUP	BRCA1	41256153C>T	427G>A	E143K	SNV	rs80356991	VUS**	Variant (rs80356991) has been reported in patients with breast and/or ovarian cancer (Easton 2007, Lindor 2012). Multi-factorial analysis has indicated low probability of causation or pathogenicity (Easton 2007, Lindor 2012). Observed at a frequency of 0.007955 percent (22/276560 alleles) in GnomAD. The glutamate at residue 143 is moderately conserved. Computational algorithms predict no impact o…	2017-09-14	Benign	BS1 | BS3 | BP6 | PP3	[16]	HDR activity like WT and low impaired SSA activity
ARUP	BRCA2	32930633C>T	7504C>T	R2502C	SNV	rs55716624	VUS**		2017-11-17	Benign	BS1 | BS3 | BP1 | BP4 | PM1	[17]	HDR activity like WT
ARUP	BRCA2	32930651G>A	7522G>A	G2508S	SNV	rs80358978	VUS		2017-06-30	Benign	BS1 | BS3 | BP1 | PM1 | PP3	[17] [12]	HDR activity like WT complementation of cell lethal phenotype, HRD activity (50%), cisplatin-sensitivity (37%)
ARUP	BRCA2	32972525C>T	9875C>T	P3292L	SNV	rs56121817	VUS	Variant (rs56121817) is described in breast cancer families (Borg 2010, Francies 2015, Riahi 2015, Chao2016). Observed in 20/245936 alleles in GnomAD. The proline at this position is conserved across species. Computational algorithms predict that variant is deleterious. Functional studies: no effect on at least some functions (Eashi 2005, Hucl 2008). Considering available information, this varian…	2018-10-10	Benign	BS1 | BS3 | BP1 | BP4	[18]	HDR activity like WT
ARUP	BRCA1	41243703T>A	3845A>T	E1282V	SNV	rs80357217	VUS		2018-10-10	Likely benign	BS3 | BP4 | PM2	[19]	complementation of cell lethal phenotype
ARUP	BRCA2	32899239A>G	343A>G	K115E	SNV	rs56242644	VUS		2017-06-30	Likely benign	BP1 | BP4
ARUP	BRCA2	32899248C>T	352C>T	R118C	SNV	rs375125172	VUS	Variant (rs375125172) is reported in one individual affected with breast cancer (Zhong 2016). Found in the African population with an overall allele frequency of 0.03% (4/15,298 alleles) in GnomAD. The arginine at codon 118 is weakly conserved. Computational analyses predict that this variant is tolerated. Due to limited information, the clinical significance of the variant is uncertain at this t…	2019-08-05	Likely benign	BS1 |BP1 | BP4
ARUP	BRCA2	32906636T>C	1021T>C	C341R	SNV	rs55833327	VUS		2017-06-30	Likely benign	BS1 |BP1 | BP4
ARUP	BRCA2	32906930T>G	1315T>G	F439V	SNV	rs80358420	VUS	Variant (rs80358420) is not described in the medical literature. Observed in 1/30962 alleles in GnomAD. The phenylalanine at this position is weakly conserved across species. Computational algorithms predict this variant is tolerated. Considering available information, there is insufficient evidence to classify this variant with certainty.	2018-10-10	Likely benign	BP1 | BP4
ARUP	BRCA2	32907440C>G	1825C>G	Q609E	SNV	rs80358472	VUS		2017-06-30	Likely benign	BP1 | BP4 | PM2
ARUP	BRCA2	32907500C>G	1885C>G	L629V	SNV	rs398122734	VUS	Variant is not reported in the literature. Absent from the general population databases. The leucine at codon 629 is weakly conserved. Computational algorithms predict this variant to be tolerated. Considering available information, this variant cannot be classified with certainty.	2018-10-10	Likely benign	BP1 | BP4 | PM2
ARUP	BRCA2	32910596A>G	2104A>G	I702V	SNV	rs774968533	VUS	Variant (rs774968533) is not reported in the literature. Observed at a low overall frequency of 0.0004% (1/245908 alleles) in GnomAD. The isoleucine at codon 702 is weakly conserved. Computational algorithms predict this variant to be tolerated. However, given the lack of clinical and functional data regarding this variant, its clinical significance cannot be determined with certainty.	2018-10-10	Likely benign	BP1 | BP4 | PM2
ARUP	BRCA2	32912031A>G	3539A>G	K1180R	SNV	rs28897720	VUS		2017-06-30	Likely benign	BP1 | BP4
ARUP	BRCA2	32912067T>G	3575T>G	F1192C	SNV	rs80358606	VUS	Variant (rs80358606) is observed in general population databases with an allele frequency of 0.13 percent (45/34404 alleles) in Latinos. The phenylalanine at codon 1192 is weakly conserved across species. Computational algorithms predict this variant to be tolerated. However, with the limited information, the clinical significance is uncertain at this time.	2018-10-10	Likely benign	BS1 |BP1 | BP4
ARUP	BRCA2	32912546G>T	4054G>T	D1352Y	SNV	rs80358655	VUS		2018-10-10	Likely benign	BS3 | BP1 | BP4 | PM2	[20]	multifactorial likelihood probability analysis
ARUP	BRCA2	32913005A>G	4513A>G	T1505A	SNV	rs80358682	VUS		2017-06-30	Likely benign	BP1 | BP4 | PM2
ARUP	BRCA2	32913026C>T	4534C>T	R1512C	SNV	rs80358684	VUS		2018-10-10	Likely benign	BP1 | BP4
ARUP	BRCA2	32913906A>G	5414A>G	N1805S	SNV	rs80358765	VUS		2018-10-10	Likely benign	BS1 |BP1 | BP4
ARUP	BRCA2	32914104G>A	5612G>A	S1871N	SNV	rs80358782	VUS	Variant (rs80358782) has been reported in individuals with early-onset prostate cancer or breast cancer (Edwards 2003, El Saghir 2015, Lee 2008). Observed in general population databases with overall allele frequencies of 0.006 percent (17/273156 alleles). The serine at codon 1871 is weakly conserved. Computational algorithms predict this variant to be tolerated. However, due to the limited infor…	2018-10-10	Likely benign	BS1 |BP1 | BP4
ARUP	BRCA2	32914361A>G	5869A>G	I1957V	SNV	rs80358817	VUS	Variant (rs80358817) has been reported in at least one individual affected with hereditary breast and ovarian cancer (Schenkel 2016). Observed in the European population at an overall frequency of 0.004% (5/126572) in GnomAD. Computational algorithms predict that this variant does not affect protein structure and/or function. Splice predictors predict that this variant creates a cryptic donor spl…	2019-08-05	Likely benign	BP1 | BP4
ARUP	BRCA2	32914747A>T	6255A>T	L2085F	SNV	rs730881579	VUS		2018-10-10	Likely benign	BP1 | BP4 | PM2
ARUP	BRCA2	32914935C>T	6443C>T	S2148F	SNV	rs80358880	VUS	Variant is not reported in the medical literature. Absent from the general population databases. The serine at codon 2148 is moderately conserved. Computational analyses predict that this variant is tolerated. However, given the lack of clinical and functional data, the significance of the variant is uncertain at this time.	2018-10-10	Likely benign	BP1 | BP4 | PM2
ARUP	BRCA2	32937431G>A	8092G>A	A2698T	SNV	rs80359052	VUS	Variant (rs80359052) has been described in an individual with breast cancer and a family history of cancer (Manguoglu 2010). Observed with an allele frequency of 0.004331 percent (12/277058 alleles) in GnomAD. The amino acid at this position is weakly conserved across species, with several mammalian species with threonine at this position. Computational algorithms predict this variant is tolerate…	2018-10-10	Likely benign	BS1 | BP1 | BP4 | PM1
ARUP	BRCA2	32950860C>T	8686C>T	R2896C	SNV	rs373203204	VUS		2017-06-30	Likely benign	BS1 |BP1 | BP4
ARUP	BRCA2	32953559T>C	8860T>C	S2954P	SNV	rs886041145	VUS		2017-06-30	Likely benign	BP1 | BP4 | PM2
ARUP	BRCA2	32969062A>G	9493A>G	T3165A	SNV	rs587782568	VUS		2018-10-10	Likely benign	BS1 |BP1 | BP4
ARUP	BRCA2	32972369T>G	9719T>G	V3240G	SNV	rs1566260882	VUS		2018-10-10	Likely benign	BP1 | BP4 | PM2
ARUP	BRCA2	32972378C>T	9728C>T	P3243L	SNV	rs80359241	VUS		2017-06-30	Likely benign	BS1 |BP1 | BP4
ARUP	BRCA2	32972420A>G	9770A>G	K3257R	SNV	rs55847618	VUS	Variant (rs55847618) is reported in individuals affected with breast cancer (Fackenthal 2012, Pal 2013). Found in the African population with an allele frequency of 0.072% (18/24972 alleles) in GnomAD. The lysine at codon 3257 is weakly conserved. Computational analyses predict that this variant is tolerated. However, due to limited information, the clinical significance of the variant is uncerta…	2019-08-05	Likely benign	BS1 |BP1 | BP4
ARUP	BRCA2	32972852C>T	10202C>T	T3401M	SNV	rs55853199	VUS	Variant (rs55853199) found in the general population with an overall allele frequency of 0.002% (6/276618 alleles) in GnomAD. The threonine at codon 3401 is weakly conserved. Computational analyses predict conflicting effects of this variant on protein structure/function. Given the lack of clinical and functional data, the significance of the variant is uncertain at this time.	2018-10-10	Likely benign	BP1 | BP4
All data were extracted by using ClinVar Miner (version of ClinVar 2019-12-31)
[1]	Findlay, G. M. et al. Accurate classification of BRCA1 variants with saturation genome editing. Nature 562, 217-222, doi:10.1038/s41586-018-0461-z (2018).
[2]	Raponi, M. et al. Prediction of single-nucleotide substitutions that result in exon skipping: identification of a splicing silencer in BRCA1 exon 6. Human mutation 32, 436-444, doi:10.1002/humu.21458 (2011).
[3]	Anczukow, O. et al. Unclassified variants identified in BRCA1 exon 11: Consequences on splicing. Genes, chromosomes & cancer 47, 418-426, doi:10.1002/gcc.20546 (2008).
[4]	Wilson, C. A. et al. Differential subcellular localization, expression and biological toxicity of BRCA1 and the splice variant BRCA1-delta11b. Oncogene 14, 1-16, doi:10.1038/sj.onc.1200924 (1997).
[5]	Fraile-Bethencourt, E. et al. Functional classification of DNA variants by hybrid minigenes: Identification of 30 spliceogenic variants of BRCA2 exons 17 and 18. PLoS genetics 13, e1006691, doi:10.1371/journal.pgen.1006691 (2017).
[6]	Thery, J. C. et al. Contribution of bioinformatics predictions and functional splicing assays to the interpretation of unclassified variants of the BRCA genes. European journal of human genetics : EJHG 19, 1052-1058, doi:10.1038/ejhg.2011.100 (2011).
[7]	Bonatti, F. et al. RNA-based analysis of BRCA1 and BRCA2 gene alterations. Cancer genetics and cytogenetics 170, 93-101, doi:10.1016/j.cancergencyto.2006.05.005 (2006).
[8]	Machackova, E. et al. Spectrum and characterisation of BRCA1 and BRCA2 deleterious mutations in high-risk Czech patients with breast and/or ovarian cancer. BMC cancer 8, 140, doi:10.1186/1471-2407-8-140 (2008).
[9]	Acedo, A., Hernandez-Moro, C., Curiel-Garcia, A., Diez-Gomez, B. & Velasco, E. A. Functional classification of BRCA2 DNA variants by splicing assays in a large minigene with 9 exons. Human mutation 36, 210-221, doi:10.1002/humu.22725 (2015).
[10]	Parsons, M. T. et al. Large scale multifactorial likelihood quantitative analysis of BRCA1 and BRCA2 variants: An ENIGMA resource to support clinical variant classification. Human mutation 40, 1557-1578, doi:10.1002/humu.23818 (2019).
[11]	Kuznetsov, S. G., Liu, P. & Sharan, S. K. Mouse embryonic stem cell-based functional assay to evaluate mutations in BRCA2. Nature medicine 14, 875-881, doi:10.1038/nm.1719 (2008).
[12]	Mesman, R. L. S. et al. The functional impact of variants of uncertain significance in BRCA2. Genetics in medicine : official journal of the American College of Medical Genetics 21, 293-302, doi:10.1038/s41436-018-0052-2 (2019).
[13]	Wappenschmidt, B. et al. Analysis of 30 putative BRCA1 splicing mutations in hereditary breast and ovarian cancer families identifies exonic splice site mutations that escape in silico prediction. PloS one 7, e50800, doi:10.1371/journal.pone.0050800 (2012).
[14]	Ahlborn, L. B. et al. Splicing analysis of 14 BRCA1 missense variants classifies nine variants as pathogenic. Breast cancer research and treatment 150, 289-298, doi:10.1007/s10549-015-3313-7 (2015).
[15]	Lee, M. S. et al. Comprehensive analysis of missense variations in the BRCT domain of BRCA1 by structural and functional assays. Cancer research 70, 4880-4890, doi:10.1158/0008-5472.Can-09-4563 (2010).
[16]	Towler, W. I. et al. Analysis of BRCA1 variants in double-strand break repair by homologous recombination and single-strand annealing. Human mutation 34, 439-445, doi:10.1002/humu.22251 (2013).
[17]	Guidugli, L. et al. Assessment of the Clinical Relevance of BRCA2 Missense Variants by Functional and Computational Approaches. American journal of human genetics 102, 233-248, doi:10.1016/j.ajhg.2017.12.013 (2018).
[18]	Hucl, T. et al. A syngeneic variance library for functional annotation of human variation: application to BRCA2. Cancer research 68, 5023-5030, doi:10.1158/0008-5472.Can-07-6189 (2008).
[19]	Bouwman, P. et al. A high-throughput functional complementation assay for classification of BRCA1 missense variants. Cancer discovery 3, 1142-1155, doi:10.1158/2159-8290.Cd-13-0094 (2013).
[20]	Lindor, N. M. et al. A review of a multifactorial probability-based model for classification of BRCA1 and BRCA2 variants of uncertain significance (VUS). Human mutation 33, 8-21, doi:10.1002/humu.21627 (2012).
*	this variant is classified as VUS in BRCA exchange and ClinVar Miner content (last check 2020-02-24) but has been reclassified as pathogenic in ClinVar by ENIGMA based on Ref. [10] on the 2019-10-22.
**	this variant is classified as VUS in ClinVar Miner content (last check 2020-02-24) but has been reclassified as likely benign in ClinVar by ARUP on the 2019-08-05.
