# Supplementary material for: Consolidated BRCA1/2 Variant Interpretation by MH BRCA Correlates with Predicted PARP Inhibitor Efficacy Association by MH Guide
Source: Int J Mol Sci. 2020 May 29;21(11):3895. doi: 10.3390/ijms21113895 (PMC7312854; doi:10.3390/ijms21113895)
Supplement: Supplementary file 1 [file ijms-21-03895-s001.zip › Supplemental Table 5.xlsx]

## Sheet: Patients_Variants
Nr.	Case-ID	Gene	HGVS g.	HGVS c.	HGVS p.	SNP-ID number	YCH	MH BRCA
1	BRCA102	BRCA2	32914461A>C	5969A>C	D1990A	rs148618542	VUS	LIKELY BENIGN
2	BRCA062	BRCA1	41246737C>T	811G>A	V271M	rs80357244	VUS	BENIGN
3	BRCA337CG	BRCA1	41246737C>T	811G>A	V271M	rs80357244	VUS	BENIGN
		BRCA1	41246885T>C	671-8A>G	-	-	VUS	LIKELY BENIGN
		BRCA2	32906579A>C	964A>C	K322Q	rs11571640	BENIGN	BENIGN
		BRCA2	32910842A>G	2350A>G	M784V	rs11571653	BENIGN	BENIGN
		BRCA1	41223094T>C	4837A>G	S1613G	rs1799966	BENIGN	BENIGN
		BRCA2	32890572G>A	-26G>A	-	rs1799943	BENIGN	BENIGN
		BRCA2	32929232A>G	7242A>G	S2414=	rs1799955	BENIGN	BENIGN
		BRCA1	41219804T>C	4987-92A>G	-	rs8176233	BENIGN	BENIGN
		BRCA1	41231516C>T	4358-2885G>A	-	rs8176193	BENIGN	BENIGN
		BRCA1	41245237A>G	2311T>C	L771=	rs16940	BENIGN	BENIGN
		BRCA1	41244435T>C	3113A>G	E1038G	rs16941	BENIGN	BENIGN
		BRCA2	32929387T>C	7397T>C	V2466A	rs169547	BENIGN	BENIGN
		BRCA1	41219780T>C	4987-68A>G	-	rs8176234	BENIGN	BENIGN
		BRCA2	32953388T>C	8755-66T>C	-	rs4942486	BENIGN	BENIGN
		BRCA2	32936646T>C	7806-14T>C	-	rs9534262	BENIGN	BENIGN
		BRCA2	32915005G>C	6513G>C	V2171=	rs206076	BENIGN	BENIGN
		BRCA2	32913055A>G	4563A>G	L1521=	rs206075	BENIGN	BENIGN
		BRCA2	32911888A>G	3396A>G	K1132=	rs1801406	BENIGN	BENIGN
		BRCA1	41245466G>A	2082C>T	S694=	rs1799949	BENIGN	BENIGN
		BRCA1	41234470A>G	4308T>C	S1436=	rs1060915	BENIGN	BENIGN
		BRCA1	41215825C>T	5152+66G>A	-	rs3092994	BENIGN	BENIGN
		BRCA1	41244000T>C	3548A>G	K1183R	rs16942	BENIGN	BENIGN
4	BRCA304	BRCA2	32914817G>A	6325G>A	V2109I	rs79456940	VUS	LIKELY BENIGN
5	BRCA282	BRCA2	32914817G>A	6325G>A	V2109I	rs79456940	VUS	LIKELY BENIGN
6	BRCA106	BRCA2	32914817G>A	6325G>A	V2109I	rs79456940	VUS	LIKELY BENIGN
7	BRCA215	BRCA2	32930636G>A	7507G>A	V2503I	rs587782191	VUS	LIKELY BENIGN
		BRCA2	32910842A>G	2350A>G	M784V	rs11571653	BENIGN	BENIGN
8	BRCA211	BRCA2	32930636G>A	7507G>A	V2503I	rs587782191	VUS	LIKELY BENIGN
		BRCA1	41223048A>G	4883T>C	M1628T	rs4986854	BENIGN	BENIGN
		BRCA2	32910842A>G	2350A>G	M784V	rs11571653	BENIGN	BENIGN
9	BRCA034	BRCA2	32930636G>A	7507G>A	V2503I	rs587782191	VUS	LIKELY BENIGN
10	BRCA163	BRCA2	32954192C>T	9166C>T	H3056Y	-	VUS	LIKELY BENIGN
11	PrC8	BRCA2	32914175G>A	5683G>A	E1895K	rs146351301	VUS	LIKELY BENIGN
12	PrC2	BRCA1	41244100G>A	3448C>T	P1150S	rs80357272	VUS	BENIGN
13	BRCA125	BRCA1	41258531G>A	154C>T	L52F	rs80357084	VUS	BENIGN
14	BRCA275	BRCA2	32914521T>G	6029T>G	V2010G	-	VUS	LIKELY BENIGN
		BRCA1	41223048A>G	4883T>C	M1628T	rs4986854	BENIGN	BENIGN
15	BRCA216	BRCA1	41223202A>G	4729T>C	S1577P	rs80356909	VUS	BENIGN
16	BRCA144	BRCA1	41223202A>G	4729T>C	S1577P	rs80356909	VUS	BENIGN
17	BRCA138	BRCA1	41223202A>G	4729T>C	S1577P	rs80356909	VUS	BENIGN
18	BRCA283	BRCA1	41256904C>A	282G>T	Q94H	-	VUS	LIKELY BENIGN
		BRCA2	32910842A>G	2350A>G	M784V	rs11571653	BENIGN	BENIGN
19	BRCA185	BRCA2	32910678T>C	2186T>C	I729T	rs431825296	VUS	LIKELY BENIGN
20	BRCA218	BRCA2	32911676C>T	3184C>T	P1062S	rs1555283083	VUS	LIKELY BENIGN
21	BRCA152	BRCA2	32937635A>G	8296A>G	T2766A	-	VUS	LIKELY BENIGN
22	BRCA301	BRCA1	41246724C>T	824G>A	G275D	rs397509327	VUS	BENIGN
23	BRCA236	BRCA1	41243841T>C	3707A>G	N1236S	rs863224760	VUS	VUS
		BRCA2	32910842A>G	2350A>G	M784V	rs11571653	BENIGN	BENIGN
24	BRCA010	BRCA1	41243841T>C	3707A>G	N1236S	rs863224760	VUS	VUS
		BRCA2	32910842A>G	2350A>G	M784V	rs11571653	BENIGN	BENIGN
25	BRCA019	BRCA1	41244495T>C	3053A>G	N1018S	rs1567793093	VUS	VUS
26	BRCA174	BRCA1	41209091G>C	5255C>G	A1752G	rs80357028	VUS	VUS
		BRCA2	32914817G>A	6325G>A	V2109I	rs79456940	VUS	LIKELY BENIGN
		BRCA2	32910842A>G	2350A>G	M784V	rs11571653	BENIGN	BENIGN
27	BRCA331CG	BRCA2	32913407G>A	4915G>A	V1639I	rs80358716	VUS	VUS
		BRCA2	32910721T>C	2229T>C	H743=	rs1801499	BENIGN	BENIGN
		BRCA1	41223094T>C	4837A>G	S1613G	rs1799966	BENIGN	BENIGN
		BRCA2	32890572G>A	-26G>A	-	rs1799943	BENIGN	BENIGN
		BRCA2	32929232A>G	7242A>G	S2414=	rs1799955	BENIGN	BENIGN
		BRCA1	41244936G>A	2612C>T	P871L	rs799917	BENIGN	BENIGN
		BRCA1	41219804T>C	4987-92A>G	-	rs8176233	BENIGN	BENIGN
		BRCA1	41231516C>T	4358-2885G>A	-	rs8176193	BENIGN	BENIGN
		BRCA1	41245237A>G	2311T>C	L771=	rs16940	BENIGN	BENIGN
		BRCA1	41244435T>C	3113A>G	E1038G	rs16941	BENIGN	BENIGN
		BRCA2	32929387T>C	7397T>C	V2466A	rs169547	BENIGN	BENIGN
		BRCA1	41219780T>C	4987-68A>G	-	rs8176234	BENIGN	BENIGN
		BRCA2	32953388T>C	8755-66T>C	-	rs4942486	BENIGN	BENIGN
		BRCA2	32906980A>G	1365A>G	S455=	rs1801439	BENIGN	BENIGN
		BRCA2	32936646T>C	7806-14T>C	-	rs9534262	BENIGN	BENIGN
		BRCA2	32911463A>G	2971A>G	N991D	rs1799944	BENIGN	BENIGN
		BRCA2	32915005G>C	6513G>C	V2171=	rs206076	BENIGN	BENIGN
		BRCA2	32913055A>G	4563A>G	L1521=	rs206075	BENIGN	BENIGN
		BRCA2	32911888A>G	3396A>G	K1132=	rs1801406	BENIGN	BENIGN
		BRCA1	41245466G>A	2082C>T	S694=	rs1799949	BENIGN	BENIGN
		BRCA1	41234470A>G	4308T>C	S1436=	rs1060915	BENIGN	BENIGN
		BRCA1	41215825C>T	5152+66G>A	-	rs3092994	BENIGN	BENIGN
		BRCA2	32906480A>C	865A>C	N289H	rs766173	BENIGN	BENIGN
		BRCA1	41244000T>C	3548A>G	K1183R	rs16942	BENIGN	BENIGN
		BRCA2	32899388A>C	425+67A>C		rs11571610	BENIGN	BENIGN
		BRCA2	32929478C>T	7435+53C>T		rs11147489	BENIGN	BENIGN
28	BRCA259	BRCA1	41246346C>T	1202G>A	G401E	rs397507184	VUS	VUS
29	BRCA270	BRCA1	41244175A>T	3373T>A	S1125T	-	VUS	VUS
30	BRCA172	BRCA2	32914200T>C	5708T>C	I1903T	rs149474191	VUS	VUS
		BRCA2	32910842A>G	2350A>G	M784V	rs11571653	BENIGN	BENIGN
31	BRCA294	BRCA1	41246696C>G	852G>C	Q284H	-	VUS	VUS
